# Supplementary material for: Reprogramming of cancer invasiveness and macrophage education via a nanostructured antagonist of the TGFβ receptor
Source: Royal Society of Chemistry journal article supplement (doi:10.1039/c9mh00388f), 2019-01-01
Supplement: c9mh00388f1.xlsx [file c9mh00388f1.xlsx]

## Sheet: R20180100087_1
	Reference	PepCount	UniquePepCount	CoverPercent	MW	PI
	FileScan	Sequence	MH+	Diff(MH+)	Charge	Rank	Score	DeltaScore	ExpectValue	Ions	Reference	DIFF_MODIFIED_CANDIDATE	PI	MissCleavage	Modification	MatchedTIC	NumProteaseTermini	Engine	Tag	Decoy
$1-1	tr|A0A024R889|A0A024R889_HUMAN Spectrin, alpha, non-erythrocytic 1 (Alpha-fodrin), isoform CRA_g OS=Homo sapiens GN=SPTAN1 PE=4 SV=1	72	64	0.3381	282246	5.21
	R20180100087_1,30479	K.ALINADELASDVAGAEALLDR.H	2127.09	-0.00412	3	1	103.86	0	4.9e-09	0|0	sp|Q13813|SPTN1_HUMAN/tr|A0A024R889|A0A024R889_HUMAN/tr|A0A0D9SF54|A0A0D9SF54_HUMAN/tr|A0A0D9SGF6|A0A0D9SGF6_HUMAN/tr|B4DGT1|B4DGT1_HUMAN/tr|B4DTV8|B4DTV8_HUMAN		3.77	0		0	2	MASCOT		T
	R20180100087_1,22082	K.DLASVNNLLK.K	1086.62	0.00238	2	1	22.35	0	0.532	0|0	sp|Q13813|SPTN1_HUMAN/tr|A0A024R889|A0A024R889_HUMAN/tr|A0A0D9SF54|A0A0D9SF54_HUMAN/tr|A0A0D9SGF6|A0A0D9SGF6_HUMAN/tr|Q9UG16|Q9UG16_HUMAN		5.84	0		0	2	MASCOT		T
	R20180100087_1,26951	K.DLIGVQNLLK.K	1112.67	0.00089	2	1	40.92	0	0.00255	0|0	sp|Q13813|SPTN1_HUMAN/tr|A0A024R889|A0A024R889_HUMAN/tr|A0A0D9SF54|A0A0D9SF54_HUMAN/tr|A0A0D9SGF6|A0A0D9SGF6_HUMAN/tr|B4DGT1|B4DGT1_HUMAN/tr|B4DTV8|B4DTV8_HUMAN		5.84	0		0	2	MASCOT		T
	R20180100087_1,12330	K.DLTNVQNLQK.K	1172.63	-0.00116	2	1	42	0	0.00459	0|0	sp|Q13813|SPTN1_HUMAN/tr|A0A024R889|A0A024R889_HUMAN/tr|A0A0D9SF54|A0A0D9SF54_HUMAN/tr|A0A0D9SGF6|A0A0D9SGF6_HUMAN/tr|B4DGT1|B4DGT1_HUMAN/tr|B4DTV8|B4DTV8_HUMAN		5.84	0		0	2	MASCOT		T
	R20180100087_1,21853	K.EFSMMFK.H	919.405	-0.00147	2	1	26.38	0	0.0445	0|0	sp|Q13813|SPTN1_HUMAN/tr|A0A024R889|A0A024R889_HUMAN/tr|A0A0D9SF54|A0A0D9SF54_HUMAN/tr|A0A0D9SGF6|A0A0D9SGF6_HUMAN/tr|Q9UG16|Q9UG16_HUMAN		6.1	0		0	2	MASCOT		T
	R20180100087_1,26177	K.ELVLALYDYQEK.S	1483.77	-0.00447	2	1	70.54	0	6.83e-06	0|0	sp|Q13813|SPTN1_HUMAN/tr|A0A024R889|A0A024R889_HUMAN/tr|A0A0D9SF54|A0A0D9SF54_HUMAN/tr|A0A0D9SGF6|A0A0D9SGF6_HUMAN/tr|B4DGT1|B4DGT1_HUMAN/tr|B4DTV8|B4DTV8_HUMAN		4.14	0		0	2	MASCOT		T
	R20180100087_1,15457	K.EQLMASDDFGR.D	1268.56	0.00116	2	1	41.17	0	0.00189	0|0	sp|Q13813|SPTN1_HUMAN/tr|A0A024R889|A0A024R889_HUMAN/tr|A0A0D9SF54|A0A0D9SF54_HUMAN/tr|A0A0D9SGF6|A0A0D9SGF6_HUMAN/tr|B4DGT1|B4DGT1_HUMAN/tr|B4DTV8|B4DTV8_HUMAN		4.03	0		0	2	MASCOT		T
	R20180100087_1,22562	K.FMLFR.E	713.38	-0.0008	2	1	23.48	0	0.458	0|0	sp|Q13813|SPTN1_HUMAN/tr|A0A024R889|A0A024R889_HUMAN/tr|A0A0D9SF54|A0A0D9SF54_HUMAN/tr|A0A0D9SGF6|A0A0D9SGF6_HUMAN/tr|B4DGT1|B4DGT1_HUMAN/tr|Q9UG16|Q9UG16_HUMAN/tr|B4DTV8|B4DTV8_HUMAN		9.75	0		0	2	MASCOT		T
	R20180100087_1,14185	K.GNAMVEEGHFAAEDVK.A	1703.77	0.00582	2	1	76.95	0	2.34e-06	0|0	sp|Q13813|SPTN1_HUMAN/tr|A0A024R889|A0A024R889_HUMAN/tr|A0A0D9SF54|A0A0D9SF54_HUMAN/tr|A0A0D9SGF6|A0A0D9SGF6_HUMAN/tr|B4DGT1|B4DGT1_HUMAN/tr|B4DTV8|B4DTV8_HUMAN		4.4	0		0	2	MASCOT		T
	R20180100087_1,14215	K.GNAMVEEGHFAAEDVK.A	1703.77	-0.00029	3	1	48.81	0	0.000732	0|0	sp|Q13813|SPTN1_HUMAN/tr|A0A024R889|A0A024R889_HUMAN/tr|A0A0D9SF54|A0A0D9SF54_HUMAN/tr|A0A0D9SGF6|A0A0D9SGF6_HUMAN/tr|B4DGT1|B4DGT1_HUMAN/tr|B4DTV8|B4DTV8_HUMAN		4.4	0		0	2	MASCOT		T
	R20180100087_1,9800	K.HALLEADVAAHQDR.I	1545.78	0.00046	3	1	54.85	0	0.000297	0|0	sp|Q13813|SPTN1_HUMAN/tr|A0A024R889|A0A024R889_HUMAN/tr|A0A0D9SF54|A0A0D9SF54_HUMAN/tr|A0A0D9SGF6|A0A0D9SGF6_HUMAN/tr|B4DGT1|B4DGT1_HUMAN/tr|B4DTV8|B4DTV8_HUMAN		5.21	0		0	2	MASCOT		T
	R20180100087_1,11323	K.HQAFEAELSANQSR.I	1587.75	-0.00535	2	1	37.52	0	0.0437	0|0	sp|Q13813|SPTN1_HUMAN/tr|A0A024R889|A0A024R889_HUMAN/tr|A0A0D9SF54|A0A0D9SF54_HUMAN/tr|A0A0D9SGF6|A0A0D9SGF6_HUMAN/tr|B4DGT1|B4DGT1_HUMAN/tr|B4DTV8|B4DTV8_HUMAN		5.4	0		0	2	MASCOT		T
	R20180100087_1,10151	K.HQALQAEIAGHEPR.I	1556.79	-0.00095	3	1	62.44	0	4.32e-05	0|0	sp|Q13813|SPTN1_HUMAN/tr|A0A024R889|A0A024R889_HUMAN/tr|A0A0D9SF54|A0A0D9SF54_HUMAN/tr|A0A0D9SGF6|A0A0D9SGF6_HUMAN/tr|B4DGT1|B4DGT1_HUMAN/tr|B4DTV8|B4DTV8_HUMAN		6	0		0	2	MASCOT		T
	R20180100087_1,29449	K.IAALQAFADQLIAAGHYAK.G	1972.07	-0.00094	3	1	71.78	0	3.55e-06	0|0	sp|Q13813|SPTN1_HUMAN/tr|A0A024R889|A0A024R889_HUMAN/tr|A0A0D9SF54|A0A0D9SF54_HUMAN/tr|A0A0D9SGF6|A0A0D9SGF6_HUMAN/tr|Q9UG16|Q9UG16_HUMAN		6.74	0		0	2	MASCOT		T
	R20180100087_1,18825	K.ITALDEFATK.L	1108.59	0.00165	2	1	49.83	0	0.000811	0|0	sp|Q13813|SPTN1_HUMAN/tr|A0A024R889|A0A024R889_HUMAN/tr|A0A0D9SF54|A0A0D9SF54_HUMAN/tr|A0A0D9SGF6|A0A0D9SGF6_HUMAN/tr|B4DGT1|B4DGT1_HUMAN/tr|B4DTV8|B4DTV8_HUMAN		4.37	0		0	2	MASCOT		T
	R20180100087_1,22227	K.KGDILTLLNSTNK.D	1416.81	0.0002	3	1	68.01	0	9.61e-06	0|0	sp|Q13813|SPTN1_HUMAN/tr|A0A024R889|A0A024R889_HUMAN/tr|A0A0D9SF54|A0A0D9SF54_HUMAN/tr|A0A0D9SGF6|A0A0D9SGF6_HUMAN/tr|B4DGT1|B4DGT1_HUMAN/tr|B4DTV8|B4DTV8_HUMAN		8.59	1		0	2	MASCOT		T
	R20180100087_1,24908	K.KHEALMSDLSAYGSSIQALR.E	2177.1	-0.02147	3	1	44.12	0	0.017	0|0	sp|Q13813|SPTN1_HUMAN/tr|A0A024R889|A0A024R889_HUMAN/tr|A0A0D9SF54|A0A0D9SF54_HUMAN/tr|A0A0D9SGF6|A0A0D9SGF6_HUMAN/tr|B4DGT1|B4DGT1_HUMAN/tr|B4DTV8|B4DTV8_HUMAN		6.75	1		0	2	MASCOT		T
	R20180100087_1,3693	K.KLDPAQSASR.E	1072.57	0.00206	2	1	44.63	0	0.00572	0|0	sp|Q13813|SPTN1_HUMAN/tr|A0A024R889|A0A024R889_HUMAN/tr|A0A0D9SF54|A0A0D9SF54_HUMAN/tr|A0A0D9SGF6|A0A0D9SGF6_HUMAN/tr|B4DGT1|B4DGT1_HUMAN/tr|Q9UG16|Q9UG16_HUMAN/tr|B4DTV8|B4DTV8_HUMAN		8.75	1		0	2	MASCOT		T
	R20180100087_1,23459	K.LDETGNLMISEGHFASETIR.T	2220.06	-0.00162	2	1	79.11	0	2.55e-06	0|0	sp|Q13813|SPTN1_HUMAN/tr|A0A024R889|A0A024R889_HUMAN/tr|A0A0D9SF54|A0A0D9SF54_HUMAN/tr|A0A0D9SGF6|A0A0D9SGF6_HUMAN/tr|B4DGT1|B4DGT1_HUMAN/tr|B4DTV8|B4DTV8_HUMAN/tr|A0A0D9SFF6|A0A0D9SFF6_HUMAN		4.4	0		0	2	MASCOT		T
	R20180100087_1,15971	K.LDILDQER.A	1001.53	0.00318	2	1	57.46	0	0.000143	0|0	sp|Q13813|SPTN1_HUMAN/tr|A0A024R889|A0A024R889_HUMAN/tr|A0A0D9SF54|A0A0D9SF54_HUMAN/tr|A0A0D9SGF6|A0A0D9SGF6_HUMAN/tr|Q9UG16|Q9UG16_HUMAN		4.03	0		0	2	MASCOT		T
	R20180100087_1,4457	K.LDPAQSASR.E	944.48	-0.00076	2	1	26.91	0	0.117	0|0	sp|Q13813|SPTN1_HUMAN/tr|A0A024R889|A0A024R889_HUMAN/tr|A0A0D9SF54|A0A0D9SF54_HUMAN/tr|A0A0D9SGF6|A0A0D9SGF6_HUMAN/tr|B4DGT1|B4DGT1_HUMAN/tr|Q9UG16|Q9UG16_HUMAN/tr|B4DTV8|B4DTV8_HUMAN		5.84	0		0	2	MASCOT		T
	R20180100087_1,13196	K.LFGAAEVQR.F	990.537	0.00089	2	1	43.62	0	0.00445	0|0	sp|Q13813|SPTN1_HUMAN/tr|A0A024R889|A0A024R889_HUMAN/tr|A0A0D9SF54|A0A0D9SF54_HUMAN/tr|A0A0D9SGF6|A0A0D9SGF6_HUMAN/tr|B4DGT1|B4DGT1_HUMAN/tr|B4DTV8|B4DTV8_HUMAN		6	0		0	2	MASCOT		T
	R20180100087_1,4635	K.LGDSHDLQR.F	1040.51	-0.0008	3	1	35.96	0	0.0139	0|0	sp|Q13813|SPTN1_HUMAN/tr|A0A024R889|A0A024R889_HUMAN/tr|A0A0D9SF54|A0A0D9SF54_HUMAN/tr|A0A0D9SGF6|A0A0D9SGF6_HUMAN/tr|Q9UG16|Q9UG16_HUMAN		5.21	0		0	2	MASCOT		T
	R20180100087_1,13921	K.LIQEQHPEEELIK.T	1605.85	-0.00091	2	1	46.17	0	0.00637	0|0	sp|Q13813|SPTN1_HUMAN/tr|A0A024R889|A0A024R889_HUMAN/tr|A0A0D9SF54|A0A0D9SF54_HUMAN/tr|A0A0D9SGF6|A0A0D9SGF6_HUMAN/tr|B4DGT1|B4DGT1_HUMAN/tr|B4DTV8|B4DTV8_HUMAN		4.48	0		0	2	MASCOT		T
	R20180100087_1,13139	K.LIQNNHYAMEDVATR.R	1774.85	0.00431	3	1	27.04	0	0.356	0|0	sp|Q13813|SPTN1_HUMAN/tr|A0A024R889|A0A024R889_HUMAN/tr|A0A0D9SF54|A0A0D9SF54_HUMAN/tr|A0A0D9SGF6|A0A0D9SGF6_HUMAN/tr|B4DGT1|B4DGT1_HUMAN/tr|B4DTV8|B4DTV8_HUMAN		5.32	0		0	2	MASCOT		T
	R20180100087_1,13176	K.LIQNNHYAMEDVATR.R	1774.85	0.00029	3	1	35.93	0	0.0167	0|0	sp|Q13813|SPTN1_HUMAN/tr|A0A024R889|A0A024R889_HUMAN/tr|A0A0D9SF54|A0A0D9SF54_HUMAN/tr|A0A0D9SGF6|A0A0D9SGF6_HUMAN/tr|B4DGT1|B4DGT1_HUMAN/tr|B4DTV8|B4DTV8_HUMAN		5.32	0		0	2	MASCOT		T
	R20180100087_1,13205	K.LIQNNHYAMEDVATR.R	1774.85	0.00034	2	1	84.84	0	2.15e-07	0|0	sp|Q13813|SPTN1_HUMAN/tr|A0A024R889|A0A024R889_HUMAN/tr|A0A0D9SF54|A0A0D9SF54_HUMAN/tr|A0A0D9SGF6|A0A0D9SGF6_HUMAN/tr|B4DGT1|B4DGT1_HUMAN/tr|B4DTV8|B4DTV8_HUMAN		5.32	0		0	2	MASCOT		T
	R20180100087_1,9640	K.LLEAQSHFR.K	1100.58	-0.00035	2	1	38.99	0	0.0103	0|0	sp|Q13813|SPTN1_HUMAN/tr|A0A024R889|A0A024R889_HUMAN/tr|A0A1B0GUH3|A0A1B0GUH3_HUMAN/tr|A0A0D9SF54|A0A0D9SF54_HUMAN/tr|A0A0D9SGF6|A0A0D9SGF6_HUMAN/tr|Q9UG16|Q9UG16_HUMAN/tr|Q14917|Q14917_HUMAN		6.75	0		0	2	MASCOT		T
	R20180100087_1,9644	K.LLEAQSHFR.K	1100.58	-0.00068	3	1	37.39	0	0.0151	0|0	sp|Q13813|SPTN1_HUMAN/tr|A0A024R889|A0A024R889_HUMAN/tr|A0A1B0GUH3|A0A1B0GUH3_HUMAN/tr|A0A0D9SF54|A0A0D9SF54_HUMAN/tr|A0A0D9SGF6|A0A0D9SGF6_HUMAN/tr|Q9UG16|Q9UG16_HUMAN/tr|Q14917|Q14917_HUMAN		6.75	0		0	2	MASCOT		T
	R20180100087_1,14509	K.LQIASDENYKDPTNLQGK.L	2034.01	-0.00302	3	1	60.4	0	8.92e-05	0|0	sp|Q13813|SPTN1_HUMAN/tr|A0A024R889|A0A024R889_HUMAN/tr|A0A0D9SF54|A0A0D9SF54_HUMAN/tr|A0A0D9SGF6|A0A0D9SGF6_HUMAN/tr|B4DGT1|B4DGT1_HUMAN/tr|B4DTV8|B4DTV8_HUMAN/tr|A0A0D9SFF6|A0A0D9SFF6_HUMAN		4.56	1		0	2	MASCOT		T
	R20180100087_1,14541	K.LQIASDENYKDPTNLQGK.L	2034.01	0.00527	2	1	87.9	0	3.58e-07	0|0	sp|Q13813|SPTN1_HUMAN/tr|A0A024R889|A0A024R889_HUMAN/tr|A0A0D9SF54|A0A0D9SF54_HUMAN/tr|A0A0D9SGF6|A0A0D9SGF6_HUMAN/tr|B4DGT1|B4DGT1_HUMAN/tr|B4DTV8|B4DTV8_HUMAN/tr|A0A0D9SFF6|A0A0D9SFF6_HUMAN		4.56	1		0	2	MASCOT		T
	R20180100087_1,9926	K.LQTASDESYKDPTNIQSK.H	2024.98	-0.00235	2	1	86.53	0	1.54e-07	0|0	sp|Q13813|SPTN1_HUMAN/tr|A0A024R889|A0A024R889_HUMAN/tr|Q9UG16|Q9UG16_HUMAN		4.56	1		0	2	MASCOT		T
	R20180100087_1,9944	K.LQTASDESYKDPTNIQSK.H	2024.98	-0.00064	3	1	33.21	0	0.0345	0|0	sp|Q13813|SPTN1_HUMAN/tr|A0A024R889|A0A024R889_HUMAN/tr|Q9UG16|Q9UG16_HUMAN		4.56	1		0	2	MASCOT		T
	R20180100087_1,11778	K.LVQYLR.E	791.477	0.00166	2	1	25.48	0	0.23	0|0	sp|Q13813|SPTN1_HUMAN/tr|A0A024R889|A0A024R889_HUMAN/tr|A0A0D9SF54|A0A0D9SF54_HUMAN/tr|A0A0D9SGF6|A0A0D9SGF6_HUMAN/tr|B4DGT1|B4DGT1_HUMAN/tr|B4DTV8|B4DTV8_HUMAN		8.75	0		0	2	MASCOT		T
	R20180100087_1,19919	K.NQALNTDNYGHDLASVQALQR.K	2328.13	0.00248	3	1	78.63	0	9.59e-07	0|0	sp|Q13813|SPTN1_HUMAN/tr|A0A024R889|A0A024R889_HUMAN/tr|A0A0D9SF54|A0A0D9SF54_HUMAN/tr|A0A0D9SGF6|A0A0D9SGF6_HUMAN/tr|Q9UG16|Q9UG16_HUMAN		5.21	0		0	2	MASCOT		T
	R20180100087_1,11165	K.QDEVNAAWQR.L	1216.57	0.00058	2	1	69.78	0	3.03e-06	0|0	sp|Q13813|SPTN1_HUMAN/tr|A0A024R889|A0A024R889_HUMAN/tr|A0A0D9SF54|A0A0D9SF54_HUMAN/tr|A0A0D9SGF6|A0A0D9SGF6_HUMAN/tr|B4DGT1|B4DGT1_HUMAN/tr|B4DTV8|B4DTV8_HUMAN		4.37	0		0	2	MASCOT		T
	R20180100087_1,31195	K.QEAFLLNEDLGDSLDSVEALLK.K	2419.22	-0.00916	2	1	87.87	0	1.11e-07	0|0	sp|Q13813|SPTN1_HUMAN/tr|A0A024R889|A0A024R889_HUMAN/tr|A0A0D9SF54|A0A0D9SF54_HUMAN/tr|A0A0D9SGF6|A0A0D9SGF6_HUMAN/tr|B4DGT1|B4DGT1_HUMAN/tr|B4DTV8|B4DTV8_HUMAN		3.71	0		0	2	MASCOT		T
	R20180100087_1,28858	K.QETFDAGLQAFQQEGIANITALK.D	2493.26	0.00465	2	1	30.57	0	0.0599	0|0	sp|Q13813|SPTN1_HUMAN/tr|A0A024R889|A0A024R889_HUMAN/tr|A0A0D9SF54|A0A0D9SF54_HUMAN/tr|A0A0D9SGF6|A0A0D9SGF6_HUMAN/tr|Q9UG16|Q9UG16_HUMAN/tr|Q14917|Q14917_HUMAN		4.14	0		0	2	MASCOT		T
	R20180100087_1,21347	K.REELITNWEQIR.T	1586.83	-0.00274	3	1	38.7	0	0.0126	0|0	sp|Q13813|SPTN1_HUMAN/tr|A0A024R889|A0A024R889_HUMAN/tr|A0A0D9SF54|A0A0D9SF54_HUMAN/tr|A0A0D9SGF6|A0A0D9SGF6_HUMAN/tr|B4DGT1|B4DGT1_HUMAN/tr|B4DTV8|B4DTV8_HUMAN		4.79	1		0	2	MASCOT		T
	R20180100087_1,19943	K.SADESGQALLAAGHYASDEVR.E	2147	0.00175	3	1	65.2	0	3.01e-05	0|0	sp|Q13813|SPTN1_HUMAN/tr|A0A024R889|A0A024R889_HUMAN/tr|A0A0D9SF54|A0A0D9SF54_HUMAN/tr|A0A0D9SGF6|A0A0D9SGF6_HUMAN/tr|B4DGT1|B4DGT1_HUMAN/tr|B4DTV8|B4DTV8_HUMAN		4.31	0		0	2	MASCOT		T
	R20180100087_1,14643	K.SSEEIESAFR.A	1154.53	0.00345	2	1	55.14	0	0.000119	0|0	sp|Q13813|SPTN1_HUMAN/tr|A0A024R889|A0A024R889_HUMAN/tr|A0A0D9SFH4|A0A0D9SFH4_HUMAN/tr|A0A0D9SF54|A0A0D9SF54_HUMAN/tr|A0A0D9SGF6|A0A0D9SGF6_HUMAN		4.25	0		0	2	MASCOT		T
	R20180100087_1,8451	K.TATDEAYKDPSNLQGK.V	1737.83	-0.00296	2	1	103.38	0	7.76e-09	0|0	sp|Q13813|SPTN1_HUMAN/tr|A0A024R889|A0A024R889_HUMAN/tr|A0A0D9SF54|A0A0D9SF54_HUMAN/tr|A0A0D9SGF6|A0A0D9SGF6_HUMAN/tr|B4DGT1|B4DGT1_HUMAN/tr|B4DTV8|B4DTV8_HUMAN		4.56	1		0	2	MASCOT		T
	R20180100087_1,11268	K.VLETAEDIQER.R	1302.65	0.00266	2	1	75.66	0	2.13e-06	0|0	sp|Q13813|SPTN1_HUMAN/tr|A0A024R889|A0A024R889_HUMAN/tr|A0A1B0GTB7|A0A1B0GTB7_HUMAN/tr|A0A0D9SF54|A0A0D9SF54_HUMAN/tr|A0A0D9SGF6|A0A0D9SGF6_HUMAN/tr|B4DGT1|B4DGT1_HUMAN/tr|B4DTV8|B4DTV8_HUMAN/tr|A0A0D9SFF6|A0A0D9SFF6_HUMAN		4	0		0	2	MASCOT		T
	R20180100087_1,28675	R.AGTFQAFEQFGQQLLAHGHYASPEIK.Q	2875.42	0.00118	3	1	75.1	0	1.95e-06	0|0	sp|Q13813|SPTN1_HUMAN/tr|A0A024R889|A0A024R889_HUMAN/tr|A0A0D9SF54|A0A0D9SF54_HUMAN/tr|A0A0D9SGF6|A0A0D9SGF6_HUMAN/tr|Q9UG16|Q9UG16_HUMAN		6.01	0		0	2	MASCOT		T
	R20180100087_1,6665	R.ALSSEGKPYVTK.E	1279.69	-0.00012	2	1	31.63	0	0.0525	0|0	sp|Q13813|SPTN1_HUMAN/tr|A0A024R889|A0A024R889_HUMAN/tr|A0A0D9SFH4|A0A0D9SFH4_HUMAN/tr|A0A0D9SF54|A0A0D9SF54_HUMAN/tr|A0A0D9SGF6|A0A0D9SGF6_HUMAN/tr|B4DGT1|B4DGT1_HUMAN		8.54	0		0	2	MASCOT		T
	R20180100087_1,16390	R.DCEQAENWMAAR.E	1480.59	0.00122	2	1	49.45	0	7.15e-05	0|0	sp|Q13813|SPTN1_HUMAN/tr|A0A024R889|A0A024R889_HUMAN/tr|A0A0D9SF54|A0A0D9SF54_HUMAN/tr|A0A0D9SGF6|A0A0D9SGF6_HUMAN/tr|Q9UG16|Q9UG16_HUMAN		4.14	0		0	2	MASCOT		T
	R20180100087_1,26280	R.DLASVQALLR.K	1085.63	-0.00067	2	1	57.14	0	0.000122	0|0	sp|Q13813|SPTN1_HUMAN/tr|A0A024R889|A0A024R889_HUMAN/tr|A0A0D9SF54|A0A0D9SF54_HUMAN/tr|A0A0D9SGF6|A0A0D9SGF6_HUMAN/tr|B4DGT1|B4DGT1_HUMAN/tr|B4DTV8|B4DTV8_HUMAN		5.84	0		0	2	MASCOT		T
	R20180100087_1,24145	R.DLSSVQTLLTK.Q	1204.68	-0.00306	2	1	29.35	0	0.0789	0|0	sp|Q13813|SPTN1_HUMAN/tr|A0A024R889|A0A024R889_HUMAN/tr|A0A0D9SF54|A0A0D9SF54_HUMAN/tr|A0A0D9SGF6|A0A0D9SGF6_HUMAN/tr|Q9UG16|Q9UG16_HUMAN/tr|Q14917|Q14917_HUMAN		5.84	0		0	2	MASCOT		T
	R20180100087_1,13728	R.DLTGVQNLR.K	1015.55	0.00036	2	1	30.83	0	0.187	0|0	sp|Q13813|SPTN1_HUMAN/tr|A0A024R889|A0A024R889_HUMAN/tr|A0A0D9SF54|A0A0D9SF54_HUMAN/tr|A0A0D9SGF6|A0A0D9SGF6_HUMAN/tr|Q9UG16|Q9UG16_HUMAN/tr|Q14917|Q14917_HUMAN		5.84	0		0	2	MASCOT		T
	R20180100087_1,27207	R.DLTSWVTEMK.A	1209.58	-3e-05	2	1	38.67	0	0.00825	0|0	sp|Q13813|SPTN1_HUMAN/tr|A0A024R889|A0A024R889_HUMAN/tr|A0A0D9SF54|A0A0D9SF54_HUMAN/tr|A0A0D9SGF6|A0A0D9SGF6_HUMAN/tr|B4DGT1|B4DGT1_HUMAN/tr|B4DTV8|B4DTV8_HUMAN		4.37	0		0	2	MASCOT		T
	R20180100087_1,16114	R.DTEQVDNWMSK.Q	1352.58	-0.0014	2	1	43.31	0	0.0016	0|0	sp|Q13813|SPTN1_HUMAN/tr|A0A024R889|A0A024R889_HUMAN/tr|A0A0D9SF54|A0A0D9SF54_HUMAN/tr|A0A0D9SGF6|A0A0D9SGF6_HUMAN/tr|B4DGT1|B4DGT1_HUMAN/tr|B4DTV8|B4DTV8_HUMAN		4.03	0		0	2	MASCOT		T
	R20180100087_1,18702	R.DVEDEETWIR.E	1291.58	-0.00253	2	1	22.61	0	0.158	0|0	sp|Q13813|SPTN1_HUMAN/tr|A0A024R889|A0A024R889_HUMAN/tr|A0A0D9SF54|A0A0D9SF54_HUMAN/tr|A0A0D9SGF6|A0A0D9SGF6_HUMAN/tr|B4DGT1|B4DGT1_HUMAN/tr|B4DTV8|B4DTV8_HUMAN		3.83	0		0	2	MASCOT		T
	R20180100087_1,27055	R.EAFLNTEDKGDSLDSVEALIK.K	2294.14	0.00893	3	1	77.8	0	4.98e-06	0|0	sp|Q13813|SPTN1_HUMAN/tr|A0A024R889|A0A024R889_HUMAN/tr|A0A0D9SF54|A0A0D9SF54_HUMAN/tr|A0A0D9SGF6|A0A0D9SGF6_HUMAN/tr|Q9UG16|Q9UG16_HUMAN		4.02	1		0	2	MASCOT		T
	R20180100087_1,4276	R.EANQQQQFNR.N	1262.59	0.00195	2	1	51.45	0	0.000295	0|0	sp|Q13813|SPTN1_HUMAN/tr|A0A024R889|A0A024R889_HUMAN/tr|A0A0D9SF54|A0A0D9SF54_HUMAN/tr|A0A0D9SGF6|A0A0D9SGF6_HUMAN/tr|B4DGT1|B4DGT1_HUMAN/tr|B4DTV8|B4DTV8_HUMAN		6.1	0		0	2	MASCOT		T
	R20180100087_1,24486	R.EELITNWEQIR.T	1430.73	-0.00014	2	1	29.42	0	0.0803	0|0	sp|Q13813|SPTN1_HUMAN/tr|A0A024R889|A0A024R889_HUMAN/tr|A0A0D9SF54|A0A0D9SF54_HUMAN/tr|A0A0D9SGF6|A0A0D9SGF6_HUMAN/tr|B4DGT1|B4DGT1_HUMAN/tr|B4DTV8|B4DTV8_HUMAN		4.25	0		0	2	MASCOT		T
	R20180100087_1,4055	R.EKEPIAASTNR.G	1215.63	0.00271	2	1	51.38	0	0.000659	0|0	sp|Q13813|SPTN1_HUMAN/tr|A0A024R889|A0A024R889_HUMAN/tr|A0A0D9SF54|A0A0D9SF54_HUMAN/tr|A0A0D9SGF6|A0A0D9SGF6_HUMAN/tr|B4DGT1|B4DGT1_HUMAN/tr|B4DTV8|B4DTV8_HUMAN		6.24	1		0	2	MASCOT		T
	R20180100087_1,19698	R.EKEPIVGSTDYGKDEDSAEALLK.K	2494.22	0.00063	3	1	58.24	0	0.000126	0|0	sp|Q13813|SPTN1_HUMAN/tr|A0A024R889|A0A024R889_HUMAN/tr|A0A0D9SF54|A0A0D9SF54_HUMAN/tr|A0A0D9SGF6|A0A0D9SGF6_HUMAN/tr|B4DGT1|B4DGT1_HUMAN/tr|B4DTV8|B4DTV8_HUMAN		4.2	2		0	2	MASCOT		T
	R20180100087_1,27584	R.ELPTAFDYVEFTR.S	1587.77	0.00104	2	1	61.22	0	7.11e-05	0|0	sp|Q13813|SPTN1_HUMAN/tr|A0A024R889|A0A024R889_HUMAN/tr|A0A0D9SF54|A0A0D9SF54_HUMAN/tr|A0A0D9SGF6|A0A0D9SGF6_HUMAN/tr|B4DGT1|B4DGT1_HUMAN		4.14	0		0	2	MASCOT		T
	R20180100087_1,19824	R.FQFFQR.D	872.441	0.00087	2	1	30.22	0	0.0332	0|0	sp|Q13813|SPTN1_HUMAN/tr|A0A024R889|A0A024R889_HUMAN/tr|A0A0D9SF54|A0A0D9SF54_HUMAN/tr|A0A0D9SGF6|A0A0D9SGF6_HUMAN/tr|B4DGT1|B4DGT1_HUMAN/tr|B4DTV8|B4DTV8_HUMAN/tr|A0A0D9SFF6|A0A0D9SFF6_HUMAN		9.75	0		0	2	MASCOT		T
	R20180100087_1,11785	R.GLVSSDELAK.D	1018.54	0.00214	2	1	33.58	0	0.0693	0|0	sp|Q13813|SPTN1_HUMAN/tr|A0A024R889|A0A024R889_HUMAN/tr|A0A0D9SF54|A0A0D9SF54_HUMAN/tr|A0A0D9SGF6|A0A0D9SGF6_HUMAN/tr|Q9UG16|Q9UG16_HUMAN		4.37	0		0	2	MASCOT		T
	R20180100087_1,26590	R.KVEDLFLTFAK.K	1310.74	-0.00063	2	1	59.31	0	5.13e-05	0|0	sp|Q13813|SPTN1_HUMAN/tr|A0A024R889|A0A024R889_HUMAN/tr|A0A0D9SF54|A0A0D9SF54_HUMAN/tr|A0A0D9SGF6|A0A0D9SGF6_HUMAN/tr|Q9UG16|Q9UG16_HUMAN		6.07	1		0	2	MASCOT		T
	R20180100087_1,28068	R.LAALADQWQFLVQK.S	1630.9	0.00027	2	1	96.96	0	1.32e-08	0|0	sp|Q13813|SPTN1_HUMAN/tr|A0A024R889|A0A024R889_HUMAN/tr|A0A0D9SF54|A0A0D9SF54_HUMAN/tr|A0A0D9SGF6|A0A0D9SGF6_HUMAN/tr|Q9UG16|Q9UG16_HUMAN		5.84	0		0	2	MASCOT		T
	R20180100087_1,12441	R.LQQSHPLSATQIQVK.R	1677.93	-0.00222	3	1	25.41	0	0.157	0|0	sp|Q13813|SPTN1_HUMAN/tr|A0A024R889|A0A024R889_HUMAN/tr|A0A0D9SF54|A0A0D9SF54_HUMAN/tr|A0A0D9SGF6|A0A0D9SGF6_HUMAN/tr|B4DGT1|B4DGT1_HUMAN/tr|B4DTV8|B4DTV8_HUMAN		8.76	0		0	2	MASCOT		T
	R20180100087_1,12463	R.LQQSHPLSATQIQVK.R	1677.93	0.00023	2	1	56.74	0	0.000121	0|0	sp|Q13813|SPTN1_HUMAN/tr|A0A024R889|A0A024R889_HUMAN/tr|A0A0D9SF54|A0A0D9SF54_HUMAN/tr|A0A0D9SGF6|A0A0D9SGF6_HUMAN/tr|B4DGT1|B4DGT1_HUMAN/tr|B4DTV8|B4DTV8_HUMAN		8.76	0		0	2	MASCOT		T
	R20180100087_1,10187	R.MQHNLEQQIQAR.N	1495.74	0.00119	3	1	41.29	0	0.00657	0|0	sp|Q13813|SPTN1_HUMAN/tr|A0A024R889|A0A024R889_HUMAN/tr|A0A0D9SF54|A0A0D9SF54_HUMAN/tr|A0A0D9SGF6|A0A0D9SGF6_HUMAN/tr|Q9UG16|Q9UG16_HUMAN		6.5	0		0	2	MASCOT		T
	R20180100087_1,30861	R.NVEDIELWLYEVEGHLASDDYGK.D	2694.26	0.00154	3	1	61.44	0	3.33e-05	0|0	sp|Q13813|SPTN1_HUMAN/tr|A0A024R889|A0A024R889_HUMAN/tr|A0A0D9SF54|A0A0D9SF54_HUMAN/tr|A0A0D9SGF6|A0A0D9SGF6_HUMAN/tr|B4DGT1|B4DGT1_HUMAN/tr|B4DTV8|B4DTV8_HUMAN		3.95	0		0	2	MASCOT		T
	R20180100087_1,22269	R.QEQIDNQYHSLLELGEK.R	2044	0.00301	2	1	50.73	0	0.00162	0|0	tr|A0A024R889|A0A024R889_HUMAN/tr|A0A0D9SF54|A0A0D9SF54_HUMAN/tr|Q9UG16|Q9UG16_HUMAN/tr|B4DTV8|B4DTV8_HUMAN		4.4	0		0	2	MASCOT		T
	R20180100087_1,22284	R.QEQIDNQYHSLLELGEK.R	2044	0.00759	3	1	21.02	0	0.521	0|0	tr|A0A024R889|A0A024R889_HUMAN/tr|A0A0D9SF54|A0A0D9SF54_HUMAN/tr|Q9UG16|Q9UG16_HUMAN/tr|B4DTV8|B4DTV8_HUMAN		4.4	0		0	2	MASCOT		T
	R20180100087_1,14199	R.QFQDAGHFDAENIK.K	1619.74	-0.00175	2	1	82.36	0	2.47e-07	0|0	sp|Q13813|SPTN1_HUMAN/tr|A0A024R889|A0A024R889_HUMAN/tr|A0A0D9SF54|A0A0D9SF54_HUMAN/tr|A0A0D9SGF6|A0A0D9SGF6_HUMAN/tr|B4DGT1|B4DGT1_HUMAN/tr|B4DTV8|B4DTV8_HUMAN		4.54	0		0	2	MASCOT		T
	R20180100087_1,4505	R.QQVAPTDDETGK.E	1288.6	-0.00036	2	1	53.04	0	0.000202	0|0	sp|Q13813|SPTN1_HUMAN/tr|A0A024R889|A0A024R889_HUMAN/tr|A0A0D9SF54|A0A0D9SF54_HUMAN/tr|A0A0D9SGF6|A0A0D9SGF6_HUMAN/tr|B4DGT1|B4DGT1_HUMAN/tr|B4DTV8|B4DTV8_HUMAN		4.03	0		0	2	MASCOT		T
	R20180100087_1,25434	R.QWELLLEK.M	1058.59	0.00098	2	1	55.09	0	0.000319	0|0	sp|Q13813|SPTN1_HUMAN/tr|A0A024R889|A0A024R889_HUMAN/tr|A0A0D9SF54|A0A0D9SF54_HUMAN/tr|A0A0D9SGF6|A0A0D9SGF6_HUMAN/tr|B4DGT1|B4DGT1_HUMAN/tr|B4DTV8|B4DTV8_HUMAN/tr|A0A0D9SFF6|A0A0D9SFF6_HUMAN		4.53	0		0	2	MASCOT		T
	R20180100087_1,15786	R.WSQLLANSAAR.K	1216.64	-0.01486	2	1	33.7	0	0.0429	0|0	sp|Q13813|SPTN1_HUMAN/tr|A0A024R889|A0A024R889_HUMAN/tr|A0A0D9SF54|A0A0D9SF54_HUMAN/tr|A0A0D9SGF6|A0A0D9SGF6_HUMAN/tr|Q9UG16|Q9UG16_HUMAN/tr|Q14917|Q14917_HUMAN		9.75	0		0	2	MASCOT		T
$2-1	tr|Q5HY54|Q5HY54_HUMAN Filamin-A OS=Homo sapiens GN=FLNA PE=1 SV=1	62	54	0.3	276547	5.69
$2-2	sp|P21333|FLNA_HUMAN Filamin-A OS=Homo sapiens GN=FLNA PE=1 SV=4	62	54	0.2954	280736	5.7
	R20180100087_1,4642	K.AEGPGLSR.T	786.41	-0.00032	2	1	42.35	0	0.00215	0|0	sp|P21333|FLNA_HUMAN/tr|A0A087WWY3|A0A087WWY3_HUMAN/tr|Q60FE5|Q60FE5_HUMAN/tr|Q5HY54|Q5HY54_HUMAN/tr|A6NDY9|A6NDY9_HUMAN/tr|Q60FE6|Q60FE6_HUMAN		6.05	0		0	2	MASCOT		T
	R20180100087_1,12416	K.AEISFEDR.K	966.453	-0.00156	2	1	35.11	0	0.0144	0|0	sp|P21333|FLNA_HUMAN/tr|Q96C61|Q96C61_HUMAN/tr|Q60FE5|Q60FE5_HUMAN/tr|Q6NXF2|Q6NXF2_HUMAN/tr|Q8TES4|Q8TES4_HUMAN/tr|B4DTD5|B4DTD5_HUMAN/tr|Q5HY54|Q5HY54_HUMAN/tr|Q60FE6|Q60FE6_HUMAN/tr|Q2VP91|Q2VP91_HUMAN/tr|B4E2F9|B4E2F9_HUMAN/tr|H0Y5C6|H0Y5C6_HUMAN		4.14	0		0	2	MASCOT		T
	R20180100087_1,27553	K.ASGPGLNTTGVPASLPVEFTIDAK.D	2342.22	0.00091	2	1	99.55	0	2e-08	0|0	sp|P21333|FLNA_HUMAN/tr|A0A087WWY3|A0A087WWY3_HUMAN/tr|Q60FE5|Q60FE5_HUMAN/tr|Q8TES4|Q8TES4_HUMAN/tr|Q5HY54|Q5HY54_HUMAN/tr|A6NDY9|A6NDY9_HUMAN/tr|Q60FE6|Q60FE6_HUMAN		4.37	0		0	2	MASCOT		T
	R20180100087_1,4915	K.ATCAPQHGAPGPGPADASK.V	1789.83	-0.00215	2	1	89.25	0	5.4e-08	0|0	sp|P21333|FLNA_HUMAN/tr|Q96C61|Q96C61_HUMAN/tr|A0A087WWY3|A0A087WWY3_HUMAN/tr|Q60FE5|Q60FE5_HUMAN/tr|Q6NXF2|Q6NXF2_HUMAN/tr|Q8TES4|Q8TES4_HUMAN/tr|Q5HY54|Q5HY54_HUMAN/tr|A6NDY9|A6NDY9_HUMAN/tr|Q60FE6|Q60FE6_HUMAN/tr|Q86TQ3|Q86TQ3_HUMAN/tr|B4E2F9|B4E2F9_HUMAN		6.78	0		0	2	MASCOT		T
	R20180100087_1,4945	K.ATCAPQHGAPGPGPADASK.V	1789.83	-0.0026	3	1	63.86	0	1.87e-05	0|0	sp|P21333|FLNA_HUMAN/tr|Q96C61|Q96C61_HUMAN/tr|A0A087WWY3|A0A087WWY3_HUMAN/tr|Q60FE5|Q60FE5_HUMAN/tr|Q6NXF2|Q6NXF2_HUMAN/tr|Q8TES4|Q8TES4_HUMAN/tr|Q5HY54|Q5HY54_HUMAN/tr|A6NDY9|A6NDY9_HUMAN/tr|Q60FE6|Q60FE6_HUMAN/tr|Q86TQ3|Q86TQ3_HUMAN/tr|B4E2F9|B4E2F9_HUMAN		6.78	0		0	2	MASCOT		T
	R20180100087_1,27655	K.CAPGVVGPAEADIDFDIIR.N	2014.99	-0.00626	2	1	91.49	0	5.75e-08	0|0	sp|P21333|FLNA_HUMAN/tr|A0A087WWY3|A0A087WWY3_HUMAN/tr|Q60FE5|Q60FE5_HUMAN/tr|Q5HY54|Q5HY54_HUMAN/tr|A6NDY9|A6NDY9_HUMAN/tr|Q60FE6|Q60FE6_HUMAN		3.84	0		0	2	MASCOT		T
	R20180100087_1,4914	K.CSGPGLER.A	875.404	0.00031	2	1	35.09	0	0.0088	0|0	sp|P21333|FLNA_HUMAN/tr|A0A087WWY3|A0A087WWY3_HUMAN/tr|Q60FE5|Q60FE5_HUMAN/tr|Q5HY54|Q5HY54_HUMAN/tr|A6NDY9|A6NDY9_HUMAN/tr|Q60FE6|Q60FE6_HUMAN		6	0		0	2	MASCOT		T
	R20180100087_1,12992	K.CSGPGLSPGMVR.A	1217.58	0.00591	2	1	55.1	0	0.000133	0|0	sp|P21333|FLNA_HUMAN/tr|A0A087WWY3|A0A087WWY3_HUMAN/tr|Q60FE5|Q60FE5_HUMAN/tr|Q8TES4|Q8TES4_HUMAN/tr|Q5HY54|Q5HY54_HUMAN/tr|A6NDY9|A6NDY9_HUMAN/tr|Q60FE6|Q60FE6_HUMAN		8.25	0		0	2	MASCOT		T
	R20180100087_1,20171	K.DAGEGGLSLAIEGPSK.A	1500.75	-0.00291	2	1	80	0	7.77e-07	0|0	sp|P21333|FLNA_HUMAN/tr|Q96C61|Q96C61_HUMAN/tr|A0A087WWY3|A0A087WWY3_HUMAN/tr|Q60FE5|Q60FE5_HUMAN/tr|Q6NXF2|Q6NXF2_HUMAN/tr|Q8TES4|Q8TES4_HUMAN/tr|B4DTD5|B4DTD5_HUMAN/tr|Q5HY54|Q5HY54_HUMAN/tr|A6NDY9|A6NDY9_HUMAN/tr|Q60FE6|Q60FE6_HUMAN		4.14	0		0	2	MASCOT		T
	R20180100087_1,21828	K.DAGEGLLAVQITDPEGKPK.K	1938.02	-0.00389	2	1	74.71	0	2.44e-06	0|0	sp|P21333|FLNA_HUMAN/tr|A0A087WWY3|A0A087WWY3_HUMAN/tr|Q60FE5|Q60FE5_HUMAN/tr|Q8TES4|Q8TES4_HUMAN/tr|Q5HY54|Q5HY54_HUMAN/tr|A6NDY9|A6NDY9_HUMAN/tr|Q60FE6|Q60FE6_HUMAN		4.32	0		0	2	MASCOT		T
	R20180100087_1,21960	K.DGSCGVAYVVQEPGDYEVSVK.F	2258.03	-0.01014	2	1	42.4	0	0.00706	0|0	sp|P21333|FLNA_HUMAN/tr|Q96C61|Q96C61_HUMAN/tr|A0A087WWY3|A0A087WWY3_HUMAN/tr|Q60FE5|Q60FE5_HUMAN/tr|Q6NXF2|Q6NXF2_HUMAN/tr|Q8TES4|Q8TES4_HUMAN/tr|B4DTD5|B4DTD5_HUMAN/tr|Q5HY54|Q5HY54_HUMAN/tr|A6NDY9|A6NDY9_HUMAN/tr|Q60FE6|Q60FE6_HUMAN/tr|Q2VP91|Q2VP91_HUMAN/tr|B4E2F9|B4E2F9_HUMAN/tr|H0Y5C6|H0Y5C6_HUMAN		3.92	0		0	2	MASCOT		T
	R20180100087_1,12039	K.DKGEYTLVVK.W	1151.63	-0.00208	2	1	40.19	0	0.00565	0|0	sp|P21333|FLNA_HUMAN/tr|Q96C61|Q96C61_HUMAN/tr|A0A087WWY3|A0A087WWY3_HUMAN/tr|Q60FE5|Q60FE5_HUMAN/tr|Q6NXF2|Q6NXF2_HUMAN/tr|Q8TES4|Q8TES4_HUMAN/tr|Q5HY54|Q5HY54_HUMAN/tr|A6NDY9|A6NDY9_HUMAN/tr|Q60FE6|Q60FE6_HUMAN/tr|Q86TQ3|Q86TQ3_HUMAN/tr|B4E2F9|B4E2F9_HUMAN		6.07	1		0	2	MASCOT		T
	R20180100087_1,12009	K.DNGNGTYSCSYVPR.K	1589.66	-0.00222	2	1	80.1	0	3.76e-07	0|0	sp|P21333|FLNA_HUMAN/tr|A0A087WWY3|A0A087WWY3_HUMAN/tr|Q60FE5|Q60FE5_HUMAN/tr|Q5HY54|Q5HY54_HUMAN/tr|A6NDY9|A6NDY9_HUMAN/tr|Q60FE6|Q60FE6_HUMAN		5.83	0		0	2	MASCOT		T
	R20180100087_1,4988	K.ETGEHLVHVK.K	1148.61	-0.00028	2	1	47.74	0	0.00128	0|0	sp|P21333|FLNA_HUMAN/tr|Q96C61|Q96C61_HUMAN/tr|Q60FE5|Q60FE5_HUMAN/tr|Q6NXF2|Q6NXF2_HUMAN/tr|Q8TES4|Q8TES4_HUMAN/tr|B4DTD5|B4DTD5_HUMAN/tr|Q5HY54|Q5HY54_HUMAN/tr|Q60FE6|Q60FE6_HUMAN/tr|B4E2F9|B4E2F9_HUMAN		6.01	0		0	2	MASCOT		T
	R20180100087_1,25359	K.FNEEHIPDSPFVVPVASPSGDAR.R	2467.19	-0.00271	3	1	41.61	0	0.00483	0|0	sp|P21333|FLNA_HUMAN/tr|Q96C61|Q96C61_HUMAN/tr|A0A087WWY3|A0A087WWY3_HUMAN/tr|Q60FE5|Q60FE5_HUMAN/tr|Q6NXF2|Q6NXF2_HUMAN/tr|Q8TES4|Q8TES4_HUMAN/tr|B4DTD5|B4DTD5_HUMAN/tr|Q5HY54|Q5HY54_HUMAN/tr|A6NDY9|A6NDY9_HUMAN/tr|Q60FE6|Q60FE6_HUMAN/tr|Q2VP91|Q2VP91_HUMAN/tr|B4E2F9|B4E2F9_HUMAN/tr|H0Y5C6|H0Y5C6_HUMAN		4.31	0		0	2	MASCOT		T
	R20180100087_1,25385	K.FNEEHIPDSPFVVPVASPSGDAR.R	2467.19	-0.00888	2	1	43.19	0	0.00344	0|0	sp|P21333|FLNA_HUMAN/tr|Q96C61|Q96C61_HUMAN/tr|A0A087WWY3|A0A087WWY3_HUMAN/tr|Q60FE5|Q60FE5_HUMAN/tr|Q6NXF2|Q6NXF2_HUMAN/tr|Q8TES4|Q8TES4_HUMAN/tr|B4DTD5|B4DTD5_HUMAN/tr|Q5HY54|Q5HY54_HUMAN/tr|A6NDY9|A6NDY9_HUMAN/tr|Q60FE6|Q60FE6_HUMAN/tr|Q2VP91|Q2VP91_HUMAN/tr|B4E2F9|B4E2F9_HUMAN/tr|H0Y5C6|H0Y5C6_HUMAN		4.31	0		0	2	MASCOT		T
	R20180100087_1,23805	K.GLVEPVDVVDNADGTQTVNYVPSR.E	2544.26	0.00975	2	1	75.38	0	5.41e-06	0|0	sp|P21333|FLNA_HUMAN/tr|A0A087WWY3|A0A087WWY3_HUMAN/tr|Q60FE5|Q60FE5_HUMAN/tr|Q8TES4|Q8TES4_HUMAN/tr|Q5HY54|Q5HY54_HUMAN/tr|A6NDY9|A6NDY9_HUMAN/tr|Q60FE6|Q60FE6_HUMAN		3.84	0		0	2	MASCOT		T
	R20180100087_1,23840	K.GLVEPVDVVDNADGTQTVNYVPSR.E	2544.26	0.00692	3	1	32.92	0	0.0375	0|0	sp|P21333|FLNA_HUMAN/tr|A0A087WWY3|A0A087WWY3_HUMAN/tr|Q60FE5|Q60FE5_HUMAN/tr|Q8TES4|Q8TES4_HUMAN/tr|Q5HY54|Q5HY54_HUMAN/tr|A6NDY9|A6NDY9_HUMAN/tr|Q60FE6|Q60FE6_HUMAN		3.84	0		0	2	MASCOT		T
	R20180100087_1,4241	K.IECDDKGDGSCDVR.Y	1625.65	-0.00144	3	1	40.88	0	0.000539	0|0	sp|Q14315|FLNC_HUMAN/sp|P21333|FLNA_HUMAN/tr|A0A087WWY3|A0A087WWY3_HUMAN/tr|Q60FE5|Q60FE5_HUMAN/tr|Q5HY54|Q5HY54_HUMAN/tr|A6NDY9|A6NDY9_HUMAN/tr|Q60FE6|Q60FE6_HUMAN		4.04	1		0	2	MASCOT		T
	R20180100087_1,4243	K.IECDDKGDGSCDVR.Y	1625.65	0.0003	2	1	75.93	0	1.44e-07	0|0	sp|Q14315|FLNC_HUMAN/sp|P21333|FLNA_HUMAN/tr|A0A087WWY3|A0A087WWY3_HUMAN/tr|Q60FE5|Q60FE5_HUMAN/tr|Q5HY54|Q5HY54_HUMAN/tr|A6NDY9|A6NDY9_HUMAN/tr|Q60FE6|Q60FE6_HUMAN		4.04	1		0	2	MASCOT		T
	R20180100087_1,4401	K.KGEITGEVR.M	988.542	0.00033	2	1	50	0	0.00109	0|0	sp|P21333|FLNA_HUMAN/tr|A0A087WWY3|A0A087WWY3_HUMAN/tr|Q60FE5|Q60FE5_HUMAN/tr|Q6NXF2|Q6NXF2_HUMAN/tr|Q8TES4|Q8TES4_HUMAN/tr|Q5HY54|Q5HY54_HUMAN/tr|A6NDY9|A6NDY9_HUMAN/tr|Q60FE6|Q60FE6_HUMAN/tr|H0Y5F3|H0Y5F3_HUMAN		6.14	1		0	2	MASCOT		T
	R20180100087_1,20188	K.LDVQFSGLTK.G	1107.6	-0.00126	2	1	65.96	0	5.53e-05	0|0	sp|P21333|FLNA_HUMAN/tr|A0A087WWY3|A0A087WWY3_HUMAN/tr|Q60FE5|Q60FE5_HUMAN/tr|Q5HY54|Q5HY54_HUMAN/tr|A6NDY9|A6NDY9_HUMAN/tr|Q60FE6|Q60FE6_HUMAN		5.84	0		0	2	MASCOT		T
	R20180100087_1,25278	K.LQVEPAVDTSGVQCYGPGIEGQGVFR.E	2763.34	-0.00363	2	1	68.37	0	1.75e-05	0|0	sp|P21333|FLNA_HUMAN/tr|A0A087WWY3|A0A087WWY3_HUMAN/tr|Q60FE5|Q60FE5_HUMAN/tr|Q8TES4|Q8TES4_HUMAN/tr|Q5HY54|Q5HY54_HUMAN/tr|A6NDY9|A6NDY9_HUMAN/tr|Q60FE6|Q60FE6_HUMAN		4.14	0		0	2	MASCOT		T
	R20180100087_1,7988	K.MDCQECPEGYR.V	1444.53	0.00047	2	1	55.85	0	2.26e-05	0|0	sp|P21333|FLNA_HUMAN/tr|Q96C61|Q96C61_HUMAN/tr|A0A087WWY3|A0A087WWY3_HUMAN/tr|Q60FE5|Q60FE5_HUMAN/tr|Q6NXF2|Q6NXF2_HUMAN/tr|Q8TES4|Q8TES4_HUMAN/tr|Q5HY54|Q5HY54_HUMAN/tr|A6NDY9|A6NDY9_HUMAN/tr|Q60FE6|Q60FE6_HUMAN/tr|Q86TQ3|Q86TQ3_HUMAN/tr|B4E2F9|B4E2F9_HUMAN		4.14	0		0	2	MASCOT		T
	R20180100087_1,25039	K.SPFSVAVSPSLDLSK.I	1533.82	-0.0015	2	1	68.11	0	1.25e-05	0|0	sp|P21333|FLNA_HUMAN/tr|A0A087WWY3|A0A087WWY3_HUMAN/tr|Q60FE5|Q60FE5_HUMAN/tr|Q5HY54|Q5HY54_HUMAN/tr|A6NDY9|A6NDY9_HUMAN/tr|Q60FE6|Q60FE6_HUMAN		5.55	0		0	2	MASCOT		T
	R20180100087_1,14085	K.TGVAVNKPAEFTVDAK.H	1646.87	-0.00165	2	1	74.93	0	2.74e-06	0|0	sp|P21333|FLNA_HUMAN/tr|A0A087WWY3|A0A087WWY3_HUMAN/tr|Q60FE5|Q60FE5_HUMAN/tr|Q5HY54|Q5HY54_HUMAN/tr|A6NDY9|A6NDY9_HUMAN/tr|Q60FE6|Q60FE6_HUMAN		5.73	0		0	2	MASCOT		T
	R20180100087_1,14098	K.TGVAVNKPAEFTVDAK.H	1646.87	-0.00138	3	1	40.4	0	0.0078	0|0	sp|P21333|FLNA_HUMAN/tr|A0A087WWY3|A0A087WWY3_HUMAN/tr|Q60FE5|Q60FE5_HUMAN/tr|Q5HY54|Q5HY54_HUMAN/tr|A6NDY9|A6NDY9_HUMAN/tr|Q60FE6|Q60FE6_HUMAN		5.73	0		0	2	MASCOT		T
	R20180100087_1,11526	K.VDVGKDQEFTVK.S	1364.71	0.0012	2	1	83.26	0	6.71e-07	0|0	sp|P21333|FLNA_HUMAN/tr|A0A087WWY3|A0A087WWY3_HUMAN/tr|Q60FE5|Q60FE5_HUMAN/tr|Q5HY54|Q5HY54_HUMAN/tr|A6NDY9|A6NDY9_HUMAN/tr|Q60FE6|Q60FE6_HUMAN		4.56	1		0	2	MASCOT		T
	R20180100087_1,12690	K.VEPGLGADNSVVR.F	1312.69	0	2	1	55.93	0	0.000195	0|0	sp|P21333|FLNA_HUMAN/tr|A0A087WWY3|A0A087WWY3_HUMAN/tr|Q60FE5|Q60FE5_HUMAN/tr|Q5HY54|Q5HY54_HUMAN/tr|A6NDY9|A6NDY9_HUMAN/tr|Q60FE6|Q60FE6_HUMAN		4.37	0		0	2	MASCOT		T
	R20180100087_1,3307	K.VLPTHDASK.V	967.521	-0.00102	2	1	51.57	0	0.000449	0|0	sp|P21333|FLNA_HUMAN/tr|A0A087WWY3|A0A087WWY3_HUMAN/tr|Q60FE5|Q60FE5_HUMAN/tr|Q8TES4|Q8TES4_HUMAN/tr|Q5HY54|Q5HY54_HUMAN/tr|A6NDY9|A6NDY9_HUMAN/tr|Q60FE6|Q60FE6_HUMAN		6.71	0		0	2	MASCOT		T
	R20180100087_1,3310	K.VLPTHDASK.V	967.521	-0.00107	3	1	36.67	0	0.0139	0|0	sp|P21333|FLNA_HUMAN/tr|A0A087WWY3|A0A087WWY3_HUMAN/tr|Q60FE5|Q60FE5_HUMAN/tr|Q8TES4|Q8TES4_HUMAN/tr|Q5HY54|Q5HY54_HUMAN/tr|A6NDY9|A6NDY9_HUMAN/tr|Q60FE6|Q60FE6_HUMAN		6.71	0		0	2	MASCOT		T
	R20180100087_1,18501	K.VNQPASFAVSLNGAK.G	1502.8	-0.00037	2	1	61.25	0	8.28e-05	0|0	sp|P21333|FLNA_HUMAN/tr|Q96C61|Q96C61_HUMAN/tr|A0A087WWY3|A0A087WWY3_HUMAN/tr|Q60FE5|Q60FE5_HUMAN/tr|Q6NXF2|Q6NXF2_HUMAN/tr|Q8TES4|Q8TES4_HUMAN/tr|B4DTD5|B4DTD5_HUMAN/tr|Q5HY54|Q5HY54_HUMAN/tr|A6NDY9|A6NDY9_HUMAN/tr|Q60FE6|Q60FE6_HUMAN/tr|B4E2F9|B4E2F9_HUMAN		8.72	0		0	2	MASCOT		T
	R20180100087_1,5180	K.VPVHDVTDASK.V	1167.6	0.00041	3	1	43	0	0.00496	0|0	sp|P21333|FLNA_HUMAN/tr|A0A087WWY3|A0A087WWY3_HUMAN/tr|Q60FE5|Q60FE5_HUMAN/tr|Q8TES4|Q8TES4_HUMAN/tr|Q5HY54|Q5HY54_HUMAN/tr|A6NDY9|A6NDY9_HUMAN/tr|Q60FE6|Q60FE6_HUMAN		5.21	0		0	2	MASCOT		T
	R20180100087_1,11970	K.VTAQGPGLEPSGNIANK.T	1652.86	0.00429	2	1	69.19	0	1e-05	0|0	sp|P21333|FLNA_HUMAN/tr|A0A087WWY3|A0A087WWY3_HUMAN/tr|Q60FE5|Q60FE5_HUMAN/tr|Q5HY54|Q5HY54_HUMAN/tr|F8WE98|F8WE98_HUMAN/tr|A6NDY9|A6NDY9_HUMAN/tr|Q60FE6|Q60FE6_HUMAN		5.97	0		0	2	MASCOT		T
	R20180100087_1,21618	K.YGGDEIPFSPYR.V	1400.65	-0.00113	2	1	34.93	0	0.0143	0|0	sp|P21333|FLNA_HUMAN/tr|A0A087WWY3|A0A087WWY3_HUMAN/tr|Q60FE5|Q60FE5_HUMAN/tr|Q8TES4|Q8TES4_HUMAN/tr|Q5HY54|Q5HY54_HUMAN/tr|A6NDY9|A6NDY9_HUMAN/tr|Q60FE6|Q60FE6_HUMAN		4.37	0		0	2	MASCOT		T
	R20180100087_1,16517	K.YGGPYHIGGSPFK.A	1379.67	0.00048	3	1	24.88	0	0.247	0|0	sp|P21333|FLNA_HUMAN/tr|Q96C61|Q96C61_HUMAN/tr|A0A087WWY3|A0A087WWY3_HUMAN/tr|Q60FE5|Q60FE5_HUMAN/tr|Q6NXF2|Q6NXF2_HUMAN/tr|Q8TES4|Q8TES4_HUMAN/tr|Q5HY54|Q5HY54_HUMAN/tr|A6NDY9|A6NDY9_HUMAN/tr|Q60FE6|Q60FE6_HUMAN/tr|Q86TQ3|Q86TQ3_HUMAN/tr|B4E2F9|B4E2F9_HUMAN		8.5	0		0	2	MASCOT		T
	R20180100087_1,13000	K.YNEQHVPGSPFTAR.V	1602.77	0.00128	3	1	27.52	0	0.105	0|0	sp|P21333|FLNA_HUMAN/tr|Q96C61|Q96C61_HUMAN/tr|A0A087WWY3|A0A087WWY3_HUMAN/tr|Q60FE5|Q60FE5_HUMAN/tr|Q6NXF2|Q6NXF2_HUMAN/tr|Q8TES4|Q8TES4_HUMAN/tr|Q5HY54|Q5HY54_HUMAN/tr|A6NDY9|A6NDY9_HUMAN/tr|Q60FE6|Q60FE6_HUMAN		6.75	0		0	2	MASCOT		T
	R20180100087_1,13046	K.YNEQHVPGSPFTAR.V	1602.77	0.00046	2	1	33.19	0	0.0287	0|0	sp|P21333|FLNA_HUMAN/tr|Q96C61|Q96C61_HUMAN/tr|A0A087WWY3|A0A087WWY3_HUMAN/tr|Q60FE5|Q60FE5_HUMAN/tr|Q6NXF2|Q6NXF2_HUMAN/tr|Q8TES4|Q8TES4_HUMAN/tr|Q5HY54|Q5HY54_HUMAN/tr|A6NDY9|A6NDY9_HUMAN/tr|Q60FE6|Q60FE6_HUMAN		6.75	0		0	2	MASCOT		T
	R20180100087_1,21563	K.YTPVQQGPVGVNVTYGGDPIPK.S	2286.18	-0.00721	2	1	52.31	0	0.00111	0|0	sp|P21333|FLNA_HUMAN/tr|A0A087WWY3|A0A087WWY3_HUMAN/tr|Q60FE5|Q60FE5_HUMAN/tr|Q5HY54|Q5HY54_HUMAN/tr|A6NDY9|A6NDY9_HUMAN/tr|Q60FE6|Q60FE6_HUMAN		5.83	0		0	2	MASCOT		T
	R20180100087_1,5543	R.AGQSAAGAAPGGGVDTR.D	1442.7	-0.00047	2	1	52.45	0	0.000334	0|0	sp|P21333|FLNA_HUMAN/tr|Q5HY54|Q5HY54_HUMAN		5.88	0		0	2	MASCOT		T
	R20180100087_1,4751	R.ALTQTGGPHVK.A	1108.61	-0.0008	2	1	49.71	0	0.000685	0|0	sp|P21333|FLNA_HUMAN/tr|A0A087WWY3|A0A087WWY3_HUMAN/tr|Q60FE5|Q60FE5_HUMAN/tr|Q8TES4|Q8TES4_HUMAN/tr|Q5HY54|Q5HY54_HUMAN/tr|A6NDY9|A6NDY9_HUMAN/tr|Q60FE6|Q60FE6_HUMAN		8.8	0		0	2	MASCOT		T
	R20180100087_1,18575	R.AWGPGLEGGVVGK.S	1226.65	0.00091	2	1	62.47	0	4.74e-05	0|0	sp|P21333|FLNA_HUMAN/tr|A0A087WWY3|A0A087WWY3_HUMAN/tr|Q60FE5|Q60FE5_HUMAN/tr|Q5HY54|Q5HY54_HUMAN/tr|A6NDY9|A6NDY9_HUMAN/tr|Q60FE6|Q60FE6_HUMAN		6.05	0		0	2	MASCOT		T
	R20180100087_1,16988	R.EAGAGGLAIAVEGPSK.A	1426.75	0.00225	2	1	98.94	0	1.35e-08	0|0	sp|P21333|FLNA_HUMAN/tr|Q96C61|Q96C61_HUMAN/tr|Q60FE5|Q60FE5_HUMAN/tr|Q6NXF2|Q6NXF2_HUMAN/tr|Q8TES4|Q8TES4_HUMAN/tr|B4DTD5|B4DTD5_HUMAN/tr|Q5HY54|Q5HY54_HUMAN/tr|Q60FE6|Q60FE6_HUMAN/tr|Q2VP91|Q2VP91_HUMAN/tr|B4E2F9|B4E2F9_HUMAN/tr|H0Y5C6|H0Y5C6_HUMAN		4.53	0		0	2	MASCOT		T
	R20180100087_1,12591	R.EATTEFSVDAR.A	1225.57	-0.00161	2	1	56.27	0	0.000238	0|0	sp|P21333|FLNA_HUMAN/tr|A0A087WWY3|A0A087WWY3_HUMAN/tr|Q60FE5|Q60FE5_HUMAN/tr|Q8TES4|Q8TES4_HUMAN/tr|Q5HY54|Q5HY54_HUMAN/tr|A6NDY9|A6NDY9_HUMAN/tr|Q60FE6|Q60FE6_HUMAN		4.14	0		0	2	MASCOT		T
	R20180100087_1,19847	R.ENGVYLIDVK.F	1149.62	0.00028	2	1	21.28	0	2.1	0|0	sp|P21333|FLNA_HUMAN/tr|Q96C61|Q96C61_HUMAN/tr|A0A087WWY3|A0A087WWY3_HUMAN/tr|Q60FE5|Q60FE5_HUMAN/tr|Q6NXF2|Q6NXF2_HUMAN/tr|Q8TES4|Q8TES4_HUMAN/tr|B4DTD5|B4DTD5_HUMAN/tr|Q5HY54|Q5HY54_HUMAN/tr|A6NDY9|A6NDY9_HUMAN/tr|Q60FE6|Q60FE6_HUMAN/tr|B4E2F9|B4E2F9_HUMAN		4.37	0		0	2	MASCOT		T
	R20180100087_1,7593	R.FTVETR.G ! K.FTVETR.G	752.394	5e-05	2	1	23.65	0	0.174	0|0	sp|Q14315|FLNC_HUMAN ! sp|P21333|FLNA_HUMAN/tr|A0A087WWY3|A0A087WWY3_HUMAN/tr|Q60FE5|Q60FE5_HUMAN/tr|Q8TES4|Q8TES4_HUMAN/tr|Q5HY54|Q5HY54_HUMAN/tr|A6NDY9|A6NDY9_HUMAN/tr|Q60FE6|Q60FE6_HUMAN		6	0		0	2	MASCOT		T
	R20180100087_1,14174	R.FVPAEMGTHTVSVK.Y	1502.77	-0.00415	3	1	28.69	0	0.111	0|0	sp|P21333|FLNA_HUMAN/tr|Q96C61|Q96C61_HUMAN/tr|Q60FE5|Q60FE5_HUMAN/tr|Q6NXF2|Q6NXF2_HUMAN/tr|Q8TES4|Q8TES4_HUMAN/tr|B4DTD5|B4DTD5_HUMAN/tr|Q5HY54|Q5HY54_HUMAN/tr|Q60FE6|Q60FE6_HUMAN/tr|Q2VP91|Q2VP91_HUMAN/tr|B4E2F9|B4E2F9_HUMAN/tr|H0Y5C6|H0Y5C6_HUMAN		6.75	0		0	2	MASCOT		T
	R20180100087_1,16549	R.GAGTGGLGLAVEGPSEAK.M	1570.81	-0.001	2	1	108.03	0	1.2e-09	0|0	sp|P21333|FLNA_HUMAN/tr|A0A087WWY3|A0A087WWY3_HUMAN/tr|Q60FE5|Q60FE5_HUMAN/tr|Q8TES4|Q8TES4_HUMAN/tr|Q5HY54|Q5HY54_HUMAN/tr|A6NDY9|A6NDY9_HUMAN/tr|Q60FE6|Q60FE6_HUMAN		4.53	0		0	2	MASCOT		T
	R20180100087_1,29597	R.LIALLEVLSQK.R ! R.LIALLEVLSQK.K	1226.77	0.00063	2	1	62.79	0	1.03e-05	0|0	sp|Q14315|FLNC_HUMAN/sp|O75369|FLNB_HUMAN/tr|A0A024R321|A0A024R321_HUMAN ! sp|P21333|FLNA_HUMAN/tr|A0A087WWY3|A0A087WWY3_HUMAN/tr|Q60FE5|Q60FE5_HUMAN/tr|Q5HY54|Q5HY54_HUMAN/tr|F8WE98|F8WE98_HUMAN/tr|A6NDY9|A6NDY9_HUMAN/tr|Q60FE6|Q60FE6_HUMAN		6	0		0	2	MASCOT		T
	R20180100087_1,19762	R.LVSNHSLHETSSVFVDSLTK.A	2200.12	-0.0071	3	1	33.54	0	0.0339	0|0	sp|P21333|FLNA_HUMAN/tr|Q96C61|Q96C61_HUMAN/tr|A0A087WWY3|A0A087WWY3_HUMAN/tr|Q60FE5|Q60FE5_HUMAN/tr|Q6NXF2|Q6NXF2_HUMAN/tr|Q8TES4|Q8TES4_HUMAN/tr|Q5HY54|Q5HY54_HUMAN/tr|A6NDY9|A6NDY9_HUMAN/tr|Q60FE6|Q60FE6_HUMAN/tr|Q86TQ3|Q86TQ3_HUMAN/tr|B4E2F9|B4E2F9_HUMAN		5.99	0		0	2	MASCOT		T
	R20180100087_1,14218	R.NGHVGISFVPK.E	1154.63	-0.0007	2	1	22.19	0	0.788	0|0	sp|P21333|FLNA_HUMAN/tr|Q96C61|Q96C61_HUMAN/tr|Q60FE5|Q60FE5_HUMAN/tr|Q6NXF2|Q6NXF2_HUMAN/tr|Q8TES4|Q8TES4_HUMAN/tr|B4DTD5|B4DTD5_HUMAN/tr|Q5HY54|Q5HY54_HUMAN/tr|Q60FE6|Q60FE6_HUMAN/tr|B4E2F9|B4E2F9_HUMAN		8.76	0		0	2	MASCOT		T
	R20180100087_1,18888	R.SAGQGEVLVYVEDPAGHQEEAK.V	2313.1	0.00361	2	1	43.95	0	0.0021	0|0	sp|P21333|FLNA_HUMAN/tr|A0A087WWY3|A0A087WWY3_HUMAN/tr|Q60FE5|Q60FE5_HUMAN/tr|Q5HY54|Q5HY54_HUMAN/tr|F8WE98|F8WE98_HUMAN/tr|A6NDY9|A6NDY9_HUMAN/tr|Q60FE6|Q60FE6_HUMAN		4.25	0		0	2	MASCOT		T
	R20180100087_1,13652	R.SPYTVTVGQACNPSACR.A	1867.84	-0.01497	2	1	67.46	0	2.4e-05	0|0	sp|P21333|FLNA_HUMAN/tr|A0A087WWY3|A0A087WWY3_HUMAN/tr|Q60FE5|Q60FE5_HUMAN/tr|Q5HY54|Q5HY54_HUMAN/tr|F8WE98|F8WE98_HUMAN/tr|A6NDY9|A6NDY9_HUMAN/tr|Q60FE6|Q60FE6_HUMAN		7.79	0		0	2	MASCOT		T
	R20180100087_1,13536	R.TPCEEILVK.H	1088.57	-0.00413	2	1	29.64	0	0.108	0|0	sp|P21333|FLNA_HUMAN/tr|Q96C61|Q96C61_HUMAN/tr|A0A087WWY3|A0A087WWY3_HUMAN/tr|Q60FE5|Q60FE5_HUMAN/tr|Q6NXF2|Q6NXF2_HUMAN/tr|Q8TES4|Q8TES4_HUMAN/tr|Q5HY54|Q5HY54_HUMAN/tr|A6NDY9|A6NDY9_HUMAN/tr|Q60FE6|Q60FE6_HUMAN/tr|Q86TQ3|Q86TQ3_HUMAN/tr|B4E2F9|B4E2F9_HUMAN		4.53	0		0	2	MASCOT		T
	R20180100087_1,15098	R.VANPSGNLTETYVQDR.G	1763.86	-0.00326	2	1	85.71	0	6.4e-07	0|0	sp|P21333|FLNA_HUMAN/tr|A0A087WWY3|A0A087WWY3_HUMAN/tr|Q60FE5|Q60FE5_HUMAN/tr|Q8TES4|Q8TES4_HUMAN/tr|Q5HY54|Q5HY54_HUMAN/tr|A6NDY9|A6NDY9_HUMAN/tr|Q60FE6|Q60FE6_HUMAN		4.37	0		0	2	MASCOT		T
	R20180100087_1,3843	R.VHGPGIQSGTTNKPNK.F	1634.86	0.0003	3	1	24.97	0	0.24	0|0	sp|P21333|FLNA_HUMAN/tr|A0A087WWY3|A0A087WWY3_HUMAN/tr|Q60FE5|Q60FE5_HUMAN/tr|Q8TES4|Q8TES4_HUMAN/tr|Q5HY54|Q5HY54_HUMAN/tr|A6NDY9|A6NDY9_HUMAN/tr|Q60FE6|Q60FE6_HUMAN		10	0		0	2	MASCOT		T
	R20180100087_1,2506	R.VKVEPSHDASK.V	1196.63	-0.00053	3	1	43.46	0	0.00287	0|0	sp|P21333|FLNA_HUMAN/tr|A0A087WWY3|A0A087WWY3_HUMAN/tr|Q60FE5|Q60FE5_HUMAN/tr|Q5HY54|Q5HY54_HUMAN/tr|A6NDY9|A6NDY9_HUMAN/tr|Q60FE6|Q60FE6_HUMAN		6.72	1		0	2	MASCOT		T
	R20180100087_1,2526	R.VKVEPSHDASK.V	1196.63	-0.00056	2	1	59.29	0	7.5e-05	0|0	sp|P21333|FLNA_HUMAN/tr|A0A087WWY3|A0A087WWY3_HUMAN/tr|Q60FE5|Q60FE5_HUMAN/tr|Q5HY54|Q5HY54_HUMAN/tr|A6NDY9|A6NDY9_HUMAN/tr|Q60FE6|Q60FE6_HUMAN		6.72	1		0	2	MASCOT		T
	R20180100087_1,18835	R.VQVQDNEGCPVEALVK.D	1784.88	0.00301	2	1	76.52	0	1.59e-06	0|0	sp|P21333|FLNA_HUMAN/tr|A0A087WWY3|A0A087WWY3_HUMAN/tr|Q60FE5|Q60FE5_HUMAN/tr|Q5HY54|Q5HY54_HUMAN/tr|A6NDY9|A6NDY9_HUMAN/tr|Q60FE6|Q60FE6_HUMAN		4.14	0		0	2	MASCOT		T
	R20180100087_1,3412	R.VTGDDSMR.M	880.383	0.00037	2	1	45.24	0	0.000706	0|0	sp|P21333|FLNA_HUMAN/tr|Q96C61|Q96C61_HUMAN/tr|A0A087WWY3|A0A087WWY3_HUMAN/tr|Q60FE5|Q60FE5_HUMAN/tr|Q6NXF2|Q6NXF2_HUMAN/tr|Q8TES4|Q8TES4_HUMAN/tr|B4DTD5|B4DTD5_HUMAN/tr|Q5HY54|Q5HY54_HUMAN/tr|H7C2E7|H7C2E7_HUMAN/tr|A6NDY9|A6NDY9_HUMAN/tr|Q60FE6|Q60FE6_HUMAN		4.21	0		0	2	MASCOT		T
	R20180100087_1,15827	R.YAPSEAGLHEMDIR.Y	1588.74	-0.00054	2	1	81.68	0	3.02e-07	0|0	sp|P21333|FLNA_HUMAN/tr|Q96C61|Q96C61_HUMAN/tr|A0A087WWY3|A0A087WWY3_HUMAN/tr|Q60FE5|Q60FE5_HUMAN/tr|Q6NXF2|Q6NXF2_HUMAN/tr|Q8TES4|Q8TES4_HUMAN/tr|B4DTD5|B4DTD5_HUMAN/tr|Q5HY54|Q5HY54_HUMAN/tr|A6NDY9|A6NDY9_HUMAN/tr|Q60FE6|Q60FE6_HUMAN/tr|H0Y5F3|H0Y5F3_HUMAN/tr|B4E2F9|B4E2F9_HUMAN		4.65	0		0	2	MASCOT		T
	R20180100087_1,28065	R.YWPQEAGEYAVHVLCNSEDIR.L	2536.16	-0.00848	3	1	30.97	0	0.0333	0|0	sp|P21333|FLNA_HUMAN/tr|A0A087WWY3|A0A087WWY3_HUMAN/tr|Q60FE5|Q60FE5_HUMAN/tr|Q5HY54|Q5HY54_HUMAN/tr|A6NDY9|A6NDY9_HUMAN/tr|Q60FE6|Q60FE6_HUMAN		4.4	0		0	2	MASCOT		T
$3-1	sp|Q9Y490|TLN1_HUMAN Talin-1 OS=Homo sapiens GN=TLN1 PE=1 SV=3	56	47	0.266	269764	5.77
$3-2	tr|A0A1S5UZ07|A0A1S5UZ07_HUMAN Talin-1 OS=Homo sapiens GN=TLN1 PE=2 SV=1	56	47	0.2643	271417	5.8
	R20180100087_1,2764	K.AAGHPGDPESQQR.L	1349.62	2e-05	2	1	25.43	0	0.158	0|0	sp|Q9Y490|TLN1_HUMAN/tr|A0A1S5UZ07|A0A1S5UZ07_HUMAN		5.32	0		0	2	MASCOT		T
	R20180100087_1,12749	K.ALDGAFTEENR.A	1222.57	-0.00433	2	1	29.37	0	0.0621	0|0	sp|Q9Y490|TLN1_HUMAN/tr|A0A1S5UZ07|A0A1S5UZ07_HUMAN		4.14	0		0	2	MASCOT		T
	R20180100087_1,18034	K.ALGDLISATK.A	988.567	0.00059	2	1	53.44	0	0.000422	0|0	sp|Q9Y490|TLN1_HUMAN/tr|A0A1S5UZ07|A0A1S5UZ07_HUMAN		5.88	0		0	2	MASCOT		T
	R20180100087_1,13569	K.ASAGPQPLLVQSCK.A	1455.76	0.00365	2	1	47.93	0	0.00121	0|0	sp|Q9Y490|TLN1_HUMAN/tr|A0A1S5UZ07|A0A1S5UZ07_HUMAN		8.27	0		0	2	MASCOT		T
	R20180100087_1,9307	K.ASSLIEEAK.K	947.504	-0.00436	2	1	55.3	0	0.00115	0|0	sp|Q9Y490|TLN1_HUMAN/tr|A0A1S5UZ07|A0A1S5UZ07_HUMAN		4.53	0		0	2	MASCOT		T
	R20180100087_1,19277	K.ASVPTIQDQASAMQLSQCAK.N	2134.03	0.01418	2	1	90.14	0	1.57e-07	0|0	sp|Q9Y490|TLN1_HUMAN/tr|A0A1S5UZ07|A0A1S5UZ07_HUMAN		5.87	0		0	2	MASCOT		T
	R20180100087_1,3348	K.CTQDLGNSTK.A	1123.5	0.00033	2	1	51.19	0	0.000255	0|0	sp|Q9Y490|TLN1_HUMAN/tr|A0A1S5UZ07|A0A1S5UZ07_HUMAN		5.83	0		0	2	MASCOT		T
	R20180100087_1,10558	K.EAAYHPEVAPDVR.L	1453.71	0.00367	2	1	42.73	0	0.00925	0|0	sp|Q9Y490|TLN1_HUMAN/tr|A0A1S5UZ07|A0A1S5UZ07_HUMAN		4.65	0		0	2	MASCOT		T
	R20180100087_1,9045	K.EVANSTANLVK.T	1145.62	-0.00129	2	1	54.95	0	0.000313	0|0	sp|Q9Y4G6|TLN2_HUMAN/sp|Q9Y490|TLN1_HUMAN/tr|G1UI21|G1UI21_HUMAN/tr|H0YMT1|H0YMT1_HUMAN/tr|A0A1S5UZ07|A0A1S5UZ07_HUMAN/tr|A0A1B0GVU7|A0A1B0GVU7_HUMAN		6.1	0		0	2	MASCOT		T
	R20180100087_1,24732	K.EVIQEWNLTNIK.R	1486.79	0.00043	2	1	64.72	0	7.35e-05	0|0	sp|Q9Y490|TLN1_HUMAN/tr|A0A1S5UZ07|A0A1S5UZ07_HUMAN		4.53	0		0	2	MASCOT		T
	R20180100087_1,14655	K.FFYSDQNVDSR.D	1377.61	9e-05	2	1	52.26	0	0.000131	0|0	sp|Q9Y4G6|TLN2_HUMAN/sp|Q9Y490|TLN1_HUMAN/tr|A0A1S5UZ07|A0A1S5UZ07_HUMAN		4.21	0		0	2	MASCOT		T
	R20180100087_1,2471	K.GAAAHPDSEEQQQR.L	1523.68	-0.00255	3	1	49.67	0	0.000341	0|0	sp|Q9Y490|TLN1_HUMAN/tr|A0A1S5UZ07|A0A1S5UZ07_HUMAN		4.65	0		0	2	MASCOT		T
	R20180100087_1,2481	K.GAAAHPDSEEQQQR.L	1523.68	0.001	2	1	63.4	0	1.36e-05	0|0	sp|Q9Y490|TLN1_HUMAN/tr|A0A1S5UZ07|A0A1S5UZ07_HUMAN		4.65	0		0	2	MASCOT		T
	R20180100087_1,2072	K.GISM*SSSK.L	812.382	0.00291	2	1	20.04	0	0.27	0|0	sp|Q9Y490|TLN1_HUMAN/tr|A0A1S5UZ07|A0A1S5UZ07_HUMAN		8.75	0	15.994919 Oxidation (M)	0	2	MASCOT		T
	R20180100087_1,4403	K.GISMSSSK.L	796.387	-0.00075	2	1	27.43	0	0.116	0|0	sp|Q9Y490|TLN1_HUMAN/tr|A0A1S5UZ07|A0A1S5UZ07_HUMAN		8.75	0		0	2	MASCOT		T
	R20180100087_1,5335	K.ILADATAK.M	802.467	-0.00025	2	1	24.79	0	0.442	0|0	sp|Q9Y490|TLN1_HUMAN/tr|A0A1S5UZ07|A0A1S5UZ07_HUMAN		5.84	0		0	2	MASCOT		T
	R20180100087_1,12287	K.LAQAAQSSVATITR.L	1416.78	0.0005	2	1	85.18	0	2.57e-07	0|0	sp|Q9Y490|TLN1_HUMAN/tr|A0A1S5UZ07|A0A1S5UZ07_HUMAN		9.75	0		0	2	MASCOT		T
	R20180100087_1,4912	K.LEQLKPR.A	883.536	0.00044	2	1	28.91	0	0.0376	0|0	sp|Q9Y4G6|TLN2_HUMAN/sp|Q9Y490|TLN1_HUMAN/tr|G1UI21|G1UI21_HUMAN/tr|H0YMT1|H0YMT1_HUMAN/tr|A0A1S5UZ07|A0A1S5UZ07_HUMAN/tr|A0A1B0GVU7|A0A1B0GVU7_HUMAN		8.75	0		0	2	MASCOT		T
	R20180100087_1,19106	K.LHTDDELNWLDHGR.T	1720.8	0.00172	3	1	26.45	0	0.291	0|0	sp|Q9Y490|TLN1_HUMAN/tr|A0A1S5UZ07|A0A1S5UZ07_HUMAN		4.64	0		0	2	MASCOT		T
	R20180100087_1,9970	K.LKPLPGETMEK.C	1242.68	-0.00026	2	1	24.82	0	0.229	0|0	sp|Q9Y490|TLN1_HUMAN/tr|A0A1S5UZ07|A0A1S5UZ07_HUMAN		6.14	0		0	2	MASCOT		T
	R20180100087_1,26181	K.LLAALLEDEGGSGRPLLQAAK.G	2122.19	-0.00075	3	1	65.46	0	8.97e-06	0|0	sp|Q9Y490|TLN1_HUMAN/tr|A0A1S5UZ07|A0A1S5UZ07_HUMAN		4.68	0		0	2	MASCOT		T
	R20180100087_1,26203	K.LLAALLEDEGGSGRPLLQAAK.G	2122.19	-0.00193	2	1	85.33	0	3.39e-07	0|0	sp|Q9Y490|TLN1_HUMAN/tr|A0A1S5UZ07|A0A1S5UZ07_HUMAN		4.68	0		0	2	MASCOT		T
	R20180100087_1,29683	K.MVGGIAQIIAAQEEMLR.K	1829.96	0.00595	3	1	56.45	0	0.000185	0|0	sp|Q9Y490|TLN1_HUMAN/tr|A0A1S5UZ07|A0A1S5UZ07_HUMAN		4.53	0		0	2	MASCOT		T
	R20180100087_1,8511	K.NCGQMSEIEAK.V	1266.55	0.00115	2	1	67.25	0	3.03e-06	0|0	sp|Q9Y490|TLN1_HUMAN/tr|A0A1S5UZ07|A0A1S5UZ07_HUMAN		4.53	0		0	2	MASCOT		T
	R20180100087_1,20555	K.NGNLPEFGDAISTASK.A	1620.79	0.00057	2	1	37.76	0	0.0123	0|0	sp|Q9Y490|TLN1_HUMAN/tr|A0A1S5UZ07|A0A1S5UZ07_HUMAN		4.37	0		0	2	MASCOT		T
	R20180100087_1,22412	K.NLGTALAELR.T	1057.6	-0.00028	2	1	39.81	0	0.00734	0|0	sp|Q9Y490|TLN1_HUMAN/tr|A0A1S5UZ07|A0A1S5UZ07_HUMAN		6	0		0	2	MASCOT		T
	R20180100087_1,14717	K.QAAASATQTIAAAQHAASTPK.A	1995.03	0.00351	3	1	51.03	0	0.000593	0|0	sp|Q9Y490|TLN1_HUMAN/tr|A0A1S5UZ07|A0A1S5UZ07_HUMAN		8.76	0		0	2	MASCOT		T
	R20180100087_1,14738	K.QAAASATQTIAAAQHAASTPK.A	1995.03	0.00803	2	1	103.68	0	3.26e-09	0|0	sp|Q9Y490|TLN1_HUMAN/tr|A0A1S5UZ07|A0A1S5UZ07_HUMAN		8.76	0		0	2	MASCOT		T
	R20180100087_1,17641	K.QVAASTAQLLVACK.V	1459.79	-0.00541	2	1	56.99	0	0.000262	0|0	sp|Q9Y4G6|TLN2_HUMAN/sp|Q9Y490|TLN1_HUMAN/tr|G1UI21|G1UI21_HUMAN/tr|H0YMT1|H0YMT1_HUMAN/tr|A0A1S5UZ07|A0A1S5UZ07_HUMAN/tr|A0A1B0GVU7|A0A1B0GVU7_HUMAN/tr|B4DGF3|B4DGF3_HUMAN		8.22	0		0	2	MASCOT		T
	R20180100087_1,15587	K.TLSHPQQMALLDQTK.T	1710.88	-0.00018	2	1	56.84	0	0.000162	0|0	sp|Q9Y490|TLN1_HUMAN/tr|A0A1S5UZ07|A0A1S5UZ07_HUMAN		6.41	0		0	2	MASCOT		T
	R20180100087_1,15627	K.TLSHPQQMALLDQTK.T	1710.88	-0.00105	3	1	21.8	0	0.515	0|0	sp|Q9Y490|TLN1_HUMAN/tr|A0A1S5UZ07|A0A1S5UZ07_HUMAN		6.41	0		0	2	MASCOT		T
	R20180100087_1,21350	K.TMLESAGGLIQTAR.A	1447.76	-0.0046	2	1	71.02	0	1.8e-05	0|0	sp|Q9Y490|TLN1_HUMAN/tr|A0A1S5UZ07|A0A1S5UZ07_HUMAN		5.66	0		0	2	MASCOT		T
	R20180100087_1,22958	K.TMQFEPSTMVYDACR.I	1835.78	-0.00102	2	1	54.69	0	0.000109	0|0	sp|Q9Y490|TLN1_HUMAN/tr|A0A1S5UZ07|A0A1S5UZ07_HUMAN		4.37	0		0	2	MASCOT		T
	R20180100087_1,27351	K.VGAIPANALDDGQWSQGLISAAR.M	2310.18	-0.00308	2	1	116.45	0	1.58e-10	0|0	sp|Q9Y490|TLN1_HUMAN/tr|A0A1S5UZ07|A0A1S5UZ07_HUMAN		4.21	0		0	2	MASCOT		T
	R20180100087_1,27368	K.VGAIPANALDDGQWSQGLISAAR.M	2310.18	-0.00858	3	1	37.49	0	0.0125	0|0	sp|Q9Y490|TLN1_HUMAN/tr|A0A1S5UZ07|A0A1S5UZ07_HUMAN		4.21	0		0	2	MASCOT		T
	R20180100087_1,6042	K.VLVQNAAGSQEK.L	1243.66	-0.00085	2	1	59.38	0	0.0001	0|0	sp|Q9Y490|TLN1_HUMAN/tr|A0A1S5UZ07|A0A1S5UZ07_HUMAN		5.97	0		0	2	MASCOT		T
	R20180100087_1,29075	K.VSQMAQYFEPLTLAAVGAASK.T	2182.12	-0.00132	2	1	66.67	0	1.66e-05	0|0	sp|Q9Y490|TLN1_HUMAN/tr|A0A1S5UZ07|A0A1S5UZ07_HUMAN		5.97	0		0	2	MASCOT		T
	R20180100087_1,21216	K.VVAPTISSPVCQEQLVEAGR.L	2140.11	-0.00056	3	1	77.5	0	1.26e-06	0|0	sp|Q9Y490|TLN1_HUMAN/tr|A0A1S5UZ07|A0A1S5UZ07_HUMAN		4.53	0		0	2	MASCOT		T
	R20180100087_1,7354	R.ALEATTEHIR.Q	1140.6	0.00022	3	1	56.07	0	0.000195	0|0	sp|Q9Y490|TLN1_HUMAN/tr|A0A1S5UZ07|A0A1S5UZ07_HUMAN		5.4	0		0	2	MASCOT		T
	R20180100087_1,7364	R.ALEATTEHIR.Q	1140.6	-0.00035	2	1	73.25	0	3.74e-06	0|0	sp|Q9Y490|TLN1_HUMAN/tr|A0A1S5UZ07|A0A1S5UZ07_HUMAN		5.4	0		0	2	MASCOT		T
	R20180100087_1,7961	R.CVSCLPGQR.D	1076.5	-0.00081	2	1	38.56	0	0.00483	0|0	sp|Q9Y490|TLN1_HUMAN/tr|A0A1S5UZ07|A0A1S5UZ07_HUMAN		8.07	0		0	2	MASCOT		T
	R20180100087_1,5308	R.EGTETFADHR.E	1162.51	0.00162	2	1	76.66	0	2.2e-06	0|0	sp|Q9Y490|TLN1_HUMAN/tr|A0A1S5UZ07|A0A1S5UZ07_HUMAN		4.65	0		0	2	MASCOT		T
	R20180100087_1,30411	R.GVAALTSDPAVQAIVLDTASDVLDK.A	2469.31	-0.01908	3	1	27.96	0	0.0761	0|0	sp|Q9Y490|TLN1_HUMAN/tr|A0A1S5UZ07|A0A1S5UZ07_HUMAN		3.77	0		0	2	MASCOT		T
	R20180100087_1,31359	R.GVGAAATAVTQALNELLQHVK.A	2091.16	-0.00106	3	1	92.97	0	2.05e-08	0|0	sp|Q9Y490|TLN1_HUMAN/tr|A0A1S5UZ07|A0A1S5UZ07_HUMAN		6.75	0		0	2	MASCOT		T
	R20180100087_1,31365	R.GVGAAATAVTQALNELLQHVK.A	2091.16	0.00514	2	1	68.32	0	6.83e-06	0|0	sp|Q9Y490|TLN1_HUMAN/tr|A0A1S5UZ07|A0A1S5UZ07_HUMAN		6.75	0		0	2	MASCOT		T
	R20180100087_1,16142	R.IGITNHDEYSLVR.E	1516.78	-0.00413	3	1	44.83	0	0.00751	0|0	sp|Q9Y490|TLN1_HUMAN/tr|A0A1S5UZ07|A0A1S5UZ07_HUMAN		5.32	0		0	2	MASCOT		T
	R20180100087_1,25321	R.ILAQATSDLVNAIK.A	1456.84	-0.00374	2	1	85.28	0	1.36e-07	0|0	sp|Q9Y490|TLN1_HUMAN/tr|A0A1S5UZ07|A0A1S5UZ07_HUMAN		5.84	0		0	2	MASCOT		T
	R20180100087_1,12957	R.LLGITK.D ! R.LLGITK.E	644.434	0	2	1	43.63	0	0.000965	0|0	sp|Q9Y4G6|TLN2_HUMAN ! sp|Q9Y490|TLN1_HUMAN/tr|A0A1S5UZ07|A0A1S5UZ07_HUMAN		8.75	0		0	2	MASCOT		T
	R20180100087_1,26762	R.LNEAAAGLNQAATELVQASR.G	2027.05	-0.00015	2	1	133.9	0	3.96e-12	0|0	sp|Q9Y490|TLN1_HUMAN/tr|A0A1S5UZ07|A0A1S5UZ07_HUMAN		4.53	0		0	2	MASCOT		T
	R20180100087_1,26767	R.LNEAAAGLNQAATELVQASR.G	2027.05	-0.00219	3	1	93.32	0	1.26e-07	0|0	sp|Q9Y490|TLN1_HUMAN/tr|A0A1S5UZ07|A0A1S5UZ07_HUMAN		4.53	0		0	2	MASCOT		T
	R20180100087_1,18582	R.MVAAATNNLCEAANAAVQGHASQEK.L	2556.19	0.00845	3	1	63.79	0	2.37e-05	0|0	sp|Q9Y490|TLN1_HUMAN/tr|A0A1S5UZ07|A0A1S5UZ07_HUMAN		5.38	0		0	2	MASCOT		T
	R20180100087_1,14380	R.QEDVIATANLSR.K ! R.QEDVIATANLSR.R	1316.68	-0.00078	2	1	24.78	0	1.31	0|0	sp|Q9Y4G6|TLN2_HUMAN/tr|G1UI21|G1UI21_HUMAN/tr|H0YMT1|H0YMT1_HUMAN/tr|A0A1B0GVU7|A0A1B0GVU7_HUMAN ! sp|Q9Y490|TLN1_HUMAN/tr|A0A1S5UZ07|A0A1S5UZ07_HUMAN		4.37	0		0	2	MASCOT		T
	R20180100087_1,19265	R.QELAVFCSPEPPAK.T	1572.77	0.00052	2	1	81.79	0	6.42e-07	0|0	sp|Q9Y490|TLN1_HUMAN/tr|A0A1S5UZ07|A0A1S5UZ07_HUMAN		4.53	0		0	2	MASCOT		T
	R20180100087_1,28567	R.VAGSVTELIQAAEAMK.G	1617.85	0.002	2	1	100.64	0	6.95e-09	0|0	sp|Q9Y490|TLN1_HUMAN/tr|A0A1S5UZ07|A0A1S5UZ07_HUMAN		4.53	0		0	2	MASCOT		T
	R20180100087_1,10916	R.VQELGHGCAALVTK.A	1482.77	-0.00188	2	1	60.75	0	5.25e-05	0|0	sp|Q9Y490|TLN1_HUMAN/tr|A0A1S5UZ07|A0A1S5UZ07_HUMAN		6.71	0		0	2	MASCOT		T
	R20180100087_1,32824	R.YDQATDTILTVTENIFSSMGDAGEMVR.Q	2964.36	0.00157	3	1	71.62	0	5.77e-06	0|0	sp|Q9Y490|TLN1_HUMAN/tr|A0A1S5UZ07|A0A1S5UZ07_HUMAN		3.77	0		0	2	MASCOT		T
$4-1	tr|K9JA46|K9JA46_HUMAN Epididymis luminal secretory protein 52 OS=Homo sapiens GN=EL52 PE=2 SV=1	95	45	0.6202	84658.7	4.94
$4-2	sp|P07900|HS90A_HUMAN Heat shock protein HSP 90-alpha OS=Homo sapiens GN=HSP90AA1 PE=1 SV=5	95	45	0.6202	84658.7	4.94
	R20180100087_1,22014	K.ADLINNLGTIAK.F ! K.ADLINNLGTIAK.S	1242.71	0.00143	2	1	76.58	0	3.04e-06	0|0	sp|Q58FF8|H90B2_HUMAN ! sp|Q14568|HS902_HUMAN/sp|P07900|HS90A_HUMAN/sp|P08238|HS90B_HUMAN/tr|A0A024RD80|A0A024RD80_HUMAN/tr|B4DGL0|B4DGL0_HUMAN/tr|Q6PK50|Q6PK50_HUMAN/tr|Q2VPJ6|Q2VPJ6_HUMAN/tr|K9JA46|K9JA46_HUMAN/tr|O14942|O14942_HUMAN/tr|Q8TBA7|Q8TBA7_HUMAN/tr|B4DTA5|B4DTA5_HUMAN/tr|Q86SX1|Q86SX1_HUMAN/tr|B4DMA2|B4DMA2_HUMAN		5.88	0		0	2	MASCOT		T
	R20180100087_1,21025	K.ADLINNLGTIAKSGTK.A	1615.9	-0.00529	3	1	35.49	0	0.0158	0|0	sp|Q14568|HS902_HUMAN/sp|P07900|HS90A_HUMAN/sp|P08238|HS90B_HUMAN/tr|A0A024RD80|A0A024RD80_HUMAN/tr|B4DGL0|B4DGL0_HUMAN/tr|Q6PK50|Q6PK50_HUMAN/tr|Q2VPJ6|Q2VPJ6_HUMAN/tr|K9JA46|K9JA46_HUMAN/tr|O14942|O14942_HUMAN/tr|Q8TBA7|Q8TBA7_HUMAN/tr|B4DTA5|B4DTA5_HUMAN/tr|Q86SX1|Q86SX1_HUMAN/tr|B4DMA2|B4DMA2_HUMAN		8.64	1		0	2	MASCOT		T
	R20180100087_1,32844	K.AFMEALQAGADISMIGQFGVGFYSAYLVAEK.V	3284.6	-0.00042	3	1	63.87	0	2.47e-05	0|0	sp|P07900|HS90A_HUMAN/sp|P08238|HS90B_HUMAN/tr|A0A024RD80|A0A024RD80_HUMAN/tr|Q6PK50|Q6PK50_HUMAN/tr|Q2VPJ6|Q2VPJ6_HUMAN/tr|K9JA46|K9JA46_HUMAN/tr|Q8TBA7|Q8TBA7_HUMAN/tr|B4DTA5|B4DTA5_HUMAN/tr|B4DMA2|B4DMA2_HUMAN		4.14	0		0	2	MASCOT		T
	R20180100087_1,21238	K.AILFVPR.R ! R.ALLFVPR.R	815.514	-0.00121	2	1	36.84	0	0.00735	0|0	sp|Q9NQH7|XPP3_HUMAN ! sp|P07900|HS90A_HUMAN/tr|Q2VPJ6|Q2VPJ6_HUMAN/tr|O75322|O75322_HUMAN/tr|Q96HX7|Q96HX7_HUMAN/tr|K9JA46|K9JA46_HUMAN/tr|Q8TBA7|Q8TBA7_HUMAN/tr|Q86U12|Q86U12_HUMAN		9.8	0		0	2	MASCOT		T
	R20180100087_1,27749	K.CLELFTELAEDK.E	1467.7	-0.00029	2	1	53.77	0	0.000245	0|0	sp|P07900|HS90A_HUMAN/tr|Q2VPJ6|Q2VPJ6_HUMAN/tr|O75322|O75322_HUMAN/tr|Q96HX7|Q96HX7_HUMAN/tr|K9JA46|K9JA46_HUMAN/tr|Q8TBA7|Q8TBA7_HUMAN/tr|Q58FF9|Q58FF9_HUMAN/tr|Q86U12|Q86U12_HUMAN		4	0		0	2	MASCOT		T
	R20180100087_1,26632	K.CLELFTELAEDKENYK.K	2001.95	0.00365	2	1	81.06	0	4.66e-07	0|0	sp|P07900|HS90A_HUMAN/tr|Q2VPJ6|Q2VPJ6_HUMAN/tr|O75322|O75322_HUMAN/tr|Q96HX7|Q96HX7_HUMAN/tr|K9JA46|K9JA46_HUMAN/tr|Q8TBA7|Q8TBA7_HUMAN/tr|Q58FF9|Q58FF9_HUMAN/tr|Q86U12|Q86U12_HUMAN		4.25	1		0	2	MASCOT		T
	R20180100087_1,24123	K.CLELFTELAEDKENYKK.F	2130.04	-0.00132	4	1	21.68	0	0.522	0|0	sp|P07900|HS90A_HUMAN/tr|Q2VPJ6|Q2VPJ6_HUMAN/tr|O75322|O75322_HUMAN/tr|Q96HX7|Q96HX7_HUMAN/tr|K9JA46|K9JA46_HUMAN/tr|Q8TBA7|Q8TBA7_HUMAN/tr|Q58FF9|Q58FF9_HUMAN/tr|Q86U12|Q86U12_HUMAN		4.59	2		0	2	MASCOT		T
	R20180100087_1,24142	K.CLELFTELAEDKENYKK.F	2130.04	0.0002	3	1	50.54	0	0.000673	0|0	sp|P07900|HS90A_HUMAN/tr|Q2VPJ6|Q2VPJ6_HUMAN/tr|O75322|O75322_HUMAN/tr|Q96HX7|Q96HX7_HUMAN/tr|K9JA46|K9JA46_HUMAN/tr|Q8TBA7|Q8TBA7_HUMAN/tr|Q58FF9|Q58FF9_HUMAN/tr|Q86U12|Q86U12_HUMAN		4.59	2		0	2	MASCOT		T
	R20180100087_1,32589	K.DLVILLYETALLSSGFSLEDPQTHANR.I	3002.55	0.00102	3	1	65.13	0	1.86e-05	0|0	sp|P07900|HS90A_HUMAN/tr|O75322|O75322_HUMAN/tr|Q96HX7|Q96HX7_HUMAN/tr|K9JA46|K9JA46_HUMAN/tr|Q8TBA7|Q8TBA7_HUMAN		4.31	0		0	2	MASCOT		T
	R20180100087_1,11448	K.DQVANSAFVER.L	1235.6	0.0004	2	1	81.19	0	5.05e-07	0|0	sp|P07900|HS90A_HUMAN/tr|Q2VPJ6|Q2VPJ6_HUMAN/tr|O75322|O75322_HUMAN/tr|Q96HX7|Q96HX7_HUMAN/tr|K9JA46|K9JA46_HUMAN/tr|Q8TBA7|Q8TBA7_HUMAN/tr|Q86U12|Q86U12_HUMAN		4.37	0		0	2	MASCOT		T
	R20180100087_1,11072	K.EDQTEYLEER.R ! K.EDQTEYLEER.W	1311.57	0.0006	2	1	59.76	0	2.39e-05	0|0	sp|Q58FF7|H90B3_HUMAN/sp|P07900|HS90A_HUMAN/sp|P08238|HS90B_HUMAN/tr|A0A024RD80|A0A024RD80_HUMAN/tr|B4DGL0|B4DGL0_HUMAN/tr|Q6PK50|Q6PK50_HUMAN/tr|Q2VPJ6|Q2VPJ6_HUMAN/tr|G3V2J8|G3V2J8_HUMAN/tr|K9JA46|K9JA46_HUMAN/tr|Q8TBA7|Q8TBA7_HUMAN/tr|Q86U12|Q86U12_HUMAN/tr|B4DMA2|B4DMA2_HUMAN ! sp|Q58FF6|H90B4_HUMAN		3.91	0		0	2	MASCOT		T
	R20180100087_1,15329	K.EGLELPEDEEEK.K	1416.64	0.00267	2	1	31.33	0	0.0206	0|0	sp|Q58FF7|H90B3_HUMAN/sp|P07900|HS90A_HUMAN/sp|Q58FF6|H90B4_HUMAN/sp|Q58FG0|HS905_HUMAN/sp|P08238|HS90B_HUMAN/tr|A0A024RD80|A0A024RD80_HUMAN/tr|B4DGL0|B4DGL0_HUMAN/tr|Q2VPJ6|Q2VPJ6_HUMAN/tr|O75322|O75322_HUMAN/tr|Q96HX7|Q96HX7_HUMAN/tr|K9JA46|K9JA46_HUMAN/tr|Q8TBA7|Q8TBA7_HUMAN/tr|A8K3W9|A8K3W9_HUMAN/tr|Q9H6X9|Q9H6X9_HUMAN/tr|Q86U12|Q86U12_HUMAN/tr|B4DMA2|B4DMA2_HUMAN		3.77	0		0	2	MASCOT		T
	R20180100087_1,12832	K.EGLELPEDEEEKK.K ! K.EGLELPEDEEEKK.I	1544.73	-0.00122	3	1	29.37	0	0.0616	0|0	sp|Q58FF7|H90B3_HUMAN/sp|P07900|HS90A_HUMAN/sp|Q58FG0|HS905_HUMAN/sp|P08238|HS90B_HUMAN/tr|A0A024RD80|A0A024RD80_HUMAN/tr|B4DGL0|B4DGL0_HUMAN/tr|Q2VPJ6|Q2VPJ6_HUMAN/tr|O75322|O75322_HUMAN/tr|Q96HX7|Q96HX7_HUMAN/tr|K9JA46|K9JA46_HUMAN/tr|Q8TBA7|Q8TBA7_HUMAN/tr|A8K3W9|A8K3W9_HUMAN/tr|Q9H6X9|Q9H6X9_HUMAN/tr|Q86U12|Q86U12_HUMAN/tr|B4DMA2|B4DMA2_HUMAN ! sp|Q58FF6|H90B4_HUMAN		4.06	1		0	2	MASCOT		T
	R20180100087_1,10541	K.EGLELPEDEEEKKK.M ! K.EGLELPEDEEEKKK.Q	1672.83	-0.00194	3	1	35.74	0	0.0226	0|0	sp|Q58FF7|H90B3_HUMAN/sp|P08238|HS90B_HUMAN/tr|A0A024RD80|A0A024RD80_HUMAN/tr|B4DGL0|B4DGL0_HUMAN/tr|A8K3W9|A8K3W9_HUMAN/tr|Q9H6X9|Q9H6X9_HUMAN/tr|B4DMA2|B4DMA2_HUMAN ! sp|P07900|HS90A_HUMAN/sp|Q58FG0|HS905_HUMAN/tr|Q2VPJ6|Q2VPJ6_HUMAN/tr|O75322|O75322_HUMAN/tr|Q96HX7|Q96HX7_HUMAN/tr|K9JA46|K9JA46_HUMAN/tr|Q8TBA7|Q8TBA7_HUMAN/tr|Q86U12|Q86U12_HUMAN		4.31	2		0	2	MASCOT		T
	R20180100087_1,10630	K.EGLELPEDEEEKKK.M ! K.EGLELPEDEEEKKK.Q	1672.83	8e-05	2	1	62.02	0	5.04e-05	0|0	sp|Q58FF7|H90B3_HUMAN/sp|P08238|HS90B_HUMAN/tr|A0A024RD80|A0A024RD80_HUMAN/tr|B4DGL0|B4DGL0_HUMAN/tr|A8K3W9|A8K3W9_HUMAN/tr|Q9H6X9|Q9H6X9_HUMAN/tr|B4DMA2|B4DMA2_HUMAN ! sp|P07900|HS90A_HUMAN/sp|Q58FG0|HS905_HUMAN/tr|Q2VPJ6|Q2VPJ6_HUMAN/tr|O75322|O75322_HUMAN/tr|Q96HX7|Q96HX7_HUMAN/tr|K9JA46|K9JA46_HUMAN/tr|Q8TBA7|Q8TBA7_HUMAN/tr|Q86U12|Q86U12_HUMAN		4.31	2		0	2	MASCOT		T
	R20180100087_1,13195	K.EIFLR.E ! R.ELFIR.H	677.398	0.00041	2	1	21.83	0	0.344	0|0	sp|P14625|ENPL_HUMAN/sp|Q14568|HS902_HUMAN/sp|P07900|HS90A_HUMAN/sp|P08238|HS90B_HUMAN/tr|A0A024RD80|A0A024RD80_HUMAN/tr|Q96GW1|Q96GW1_HUMAN/tr|V9HWP2|V9HWP2_HUMAN/tr|Q5CAQ5|Q5CAQ5_HUMAN/tr|A0A1W2PRR1|A0A1W2PRR1_HUMAN/tr|B4DGL0|B4DGL0_HUMAN/tr|Q6PK50|Q6PK50_HUMAN/tr|Q2VPJ6|Q2VPJ6_HUMAN/tr|F8W026|F8W026_HUMAN/tr|Q59FC6|Q59FC6_HUMAN/tr|G3V2J8|G3V2J8_HUMAN/tr|H0YJF5|H0YJF5_HUMAN/tr|K9JA46|K9JA46_HUM…		6.1	0		0	2	MASCOT		T
	R20180100087_1,9461	K.EKYIDQEELNK.T	1408.7	-0.00288	3	1	23.4	0	0.466	0|0	sp|Q58FF8|H90B2_HUMAN/sp|Q14568|HS902_HUMAN/sp|P07900|HS90A_HUMAN/sp|P08238|HS90B_HUMAN/tr|A0A024RD80|A0A024RD80_HUMAN/tr|B4DGL0|B4DGL0_HUMAN/tr|Q6PK50|Q6PK50_HUMAN/tr|Q2VPJ6|Q2VPJ6_HUMAN/tr|O75322|O75322_HUMAN/tr|K9JA46|K9JA46_HUMAN/tr|Q8TBA7|Q8TBA7_HUMAN/tr|Q86U12|Q86U12_HUMAN/tr|B4DMA2|B4DMA2_HUMAN		4.41	1		0	2	MASCOT		T
	R20180100087_1,18844	K.ELHINLIPNK.Q	1190.69	2e-05	2	1	21.35	0	0.322	0|0	sp|Q14568|HS902_HUMAN/sp|P07900|HS90A_HUMAN/tr|Q2VPJ6|Q2VPJ6_HUMAN/tr|G3V2J8|G3V2J8_HUMAN/tr|K9JA46|K9JA46_HUMAN/tr|B4DTA5|B4DTA5_HUMAN/tr|Q86SX1|Q86SX1_HUMAN		6.85	0		0	2	MASCOT		T
	R20180100087_1,18849	K.ELHINLIPNK.Q	1190.69	-3e-05	3	1	27.66	0	0.0753	0|0	sp|Q14568|HS902_HUMAN/sp|P07900|HS90A_HUMAN/tr|Q2VPJ6|Q2VPJ6_HUMAN/tr|G3V2J8|G3V2J8_HUMAN/tr|K9JA46|K9JA46_HUMAN/tr|B4DTA5|B4DTA5_HUMAN/tr|Q86SX1|Q86SX1_HUMAN		6.85	0		0	2	MASCOT		T
	R20180100087_1,16200	K.ELHINLIPNKQDR.T	1589.88	-0.00507	3	1	20.59	0	0.531	0|0	sp|P07900|HS90A_HUMAN/tr|Q2VPJ6|Q2VPJ6_HUMAN/tr|G3V2J8|G3V2J8_HUMAN/tr|K9JA46|K9JA46_HUMAN/tr|B4DTA5|B4DTA5_HUMAN/tr|Q86SX1|Q86SX1_HUMAN		6.85	1		0	2	MASCOT		T
	R20180100087_1,16317	K.ELHINLIPNKQDR.T	1589.88	0.00087	2	1	30.83	0	0.0515	0|0	sp|P07900|HS90A_HUMAN/tr|Q2VPJ6|Q2VPJ6_HUMAN/tr|G3V2J8|G3V2J8_HUMAN/tr|K9JA46|K9JA46_HUMAN/tr|B4DTA5|B4DTA5_HUMAN/tr|Q86SX1|Q86SX1_HUMAN		6.85	1		0	2	MASCOT		T
	R20180100087_1,7119	K.FENLCK.L ! K.FENLCK.F ! K.FENLCK.I	810.381	0.00049	2	1	21.32	0	0.277	0|0	sp|Q58FF7|H90B3_HUMAN/sp|P08238|HS90B_HUMAN/tr|A0A024RD80|A0A024RD80_HUMAN/tr|B4DGL0|B4DGL0_HUMAN/tr|A8K3W9|A8K3W9_HUMAN/tr|Q9H6X9|Q9H6X9_HUMAN/tr|B4DMA2|B4DMA2_HUMAN ! sp|Q58FF8|H90B2_HUMAN ! sp|P07900|HS90A_HUMAN/sp|Q58FG0|HS905_HUMAN/tr|Q2VPJ6|Q2VPJ6_HUMAN/tr|O75322|O75322_HUMAN/tr|Q96HX7|Q96HX7_HUMAN/tr|K9JA46|K9JA46_HUMAN/tr|Q8TBA7|Q8TBA7_HUMAN/tr|Q86U12|Q86U12_HUMAN		5.99	0		0	2	MASCOT		T
	R20180100087_1,19709	K.HFSVEGQLEFR.A	1348.66	0.00096	2	1	41.02	0	0.0225	0|0	sp|Q58FF7|H90B3_HUMAN/sp|Q14568|HS902_HUMAN/sp|P07900|HS90A_HUMAN/sp|Q58FG1|HS904_HUMAN/sp|P08238|HS90B_HUMAN/tr|A0A024RD80|A0A024RD80_HUMAN/tr|B4DGL0|B4DGL0_HUMAN/tr|Q6PK50|Q6PK50_HUMAN/tr|Q2VPJ6|Q2VPJ6_HUMAN/tr|O75322|O75322_HUMAN/tr|Q96HX7|Q96HX7_HUMAN/tr|K9JA46|K9JA46_HUMAN/tr|Q8TBA7|Q8TBA7_HUMAN/tr|Q86U12|Q86U12_HUMAN/tr|B4DMA2|B4DMA2_HUMAN		5.4	0		0	2	MASCOT		T
	R20180100087_1,19788	K.HFSVEGQLEFR.A	1348.66	-0.00019	3	1	35.69	0	0.0768	0|0	sp|Q58FF7|H90B3_HUMAN/sp|Q14568|HS902_HUMAN/sp|P07900|HS90A_HUMAN/sp|Q58FG1|HS904_HUMAN/sp|P08238|HS90B_HUMAN/tr|A0A024RD80|A0A024RD80_HUMAN/tr|B4DGL0|B4DGL0_HUMAN/tr|Q6PK50|Q6PK50_HUMAN/tr|Q2VPJ6|Q2VPJ6_HUMAN/tr|O75322|O75322_HUMAN/tr|Q96HX7|Q96HX7_HUMAN/tr|K9JA46|K9JA46_HUMAN/tr|Q8TBA7|Q8TBA7_HUMAN/tr|Q86U12|Q86U12_HUMAN/tr|B4DMA2|B4DMA2_HUMAN		5.4	0		0	2	MASCOT		T
	R20180100087_1,20505	K.HFSVEGQLEFR.A	1348.66	-0.00166	3	1	28.27	0	0.425	0|0	sp|Q58FF7|H90B3_HUMAN/sp|Q14568|HS902_HUMAN/sp|P07900|HS90A_HUMAN/sp|Q58FG1|HS904_HUMAN/sp|P08238|HS90B_HUMAN/tr|A0A024RD80|A0A024RD80_HUMAN/tr|B4DGL0|B4DGL0_HUMAN/tr|Q6PK50|Q6PK50_HUMAN/tr|Q2VPJ6|Q2VPJ6_HUMAN/tr|O75322|O75322_HUMAN/tr|Q96HX7|Q96HX7_HUMAN/tr|K9JA46|K9JA46_HUMAN/tr|Q8TBA7|Q8TBA7_HUMAN/tr|Q86U12|Q86U12_HUMAN/tr|B4DMA2|B4DMA2_HUMAN		5.4	0		0	2	MASCOT		T
	R20180100087_1,23286	K.HFSVEGQLEFR.A	1348.66	0.00158	3	1	20.19	0	3.78	0|0	sp|Q58FF7|H90B3_HUMAN/sp|Q14568|HS902_HUMAN/sp|P07900|HS90A_HUMAN/sp|Q58FG1|HS904_HUMAN/sp|P08238|HS90B_HUMAN/tr|A0A024RD80|A0A024RD80_HUMAN/tr|B4DGL0|B4DGL0_HUMAN/tr|Q6PK50|Q6PK50_HUMAN/tr|Q2VPJ6|Q2VPJ6_HUMAN/tr|O75322|O75322_HUMAN/tr|Q96HX7|Q96HX7_HUMAN/tr|K9JA46|K9JA46_HUMAN/tr|Q8TBA7|Q8TBA7_HUMAN/tr|Q86U12|Q86U12_HUMAN/tr|B4DMA2|B4DMA2_HUMAN		5.4	0		0	2	MASCOT		T
	R20180100087_1,24750	K.HFSVEGQLEFR.A	1348.66	-0.00022	3	1	20.84	0	3.26	0|0	sp|Q58FF7|H90B3_HUMAN/sp|Q14568|HS902_HUMAN/sp|P07900|HS90A_HUMAN/sp|Q58FG1|HS904_HUMAN/sp|P08238|HS90B_HUMAN/tr|A0A024RD80|A0A024RD80_HUMAN/tr|B4DGL0|B4DGL0_HUMAN/tr|Q6PK50|Q6PK50_HUMAN/tr|Q2VPJ6|Q2VPJ6_HUMAN/tr|O75322|O75322_HUMAN/tr|Q96HX7|Q96HX7_HUMAN/tr|K9JA46|K9JA46_HUMAN/tr|Q8TBA7|Q8TBA7_HUMAN/tr|Q86U12|Q86U12_HUMAN/tr|B4DMA2|B4DMA2_HUMAN		5.4	0		0	2	MASCOT		T
	R20180100087_1,32502	K.HFSVEGQLEFR.A	1348.66	-0.00052	3	1	34.07	0	0.155	0|0	sp|Q58FF7|H90B3_HUMAN/sp|Q14568|HS902_HUMAN/sp|P07900|HS90A_HUMAN/sp|Q58FG1|HS904_HUMAN/sp|P08238|HS90B_HUMAN/tr|A0A024RD80|A0A024RD80_HUMAN/tr|B4DGL0|B4DGL0_HUMAN/tr|Q6PK50|Q6PK50_HUMAN/tr|Q2VPJ6|Q2VPJ6_HUMAN/tr|O75322|O75322_HUMAN/tr|Q96HX7|Q96HX7_HUMAN/tr|K9JA46|K9JA46_HUMAN/tr|Q8TBA7|Q8TBA7_HUMAN/tr|Q86U12|Q86U12_HUMAN/tr|B4DMA2|B4DMA2_HUMAN		5.4	0		0	2	MASCOT		T
	R20180100087_1,27206	K.HGLEVIYM*IEPIDEYCVQQLK.E	2593.27	-0.00147	2	1	72.93	0	7.34e-06	0|0	sp|P07900|HS90A_HUMAN/tr|Q2VPJ6|Q2VPJ6_HUMAN/tr|O75322|O75322_HUMAN/tr|Q96HX7|Q96HX7_HUMAN/tr|K9JA46|K9JA46_HUMAN/tr|Q8TBA7|Q8TBA7_HUMAN/tr|Q86U12|Q86U12_HUMAN		4.4	0	15.994919 Oxidation (M)	0	2	MASCOT		T
	R20180100087_1,28382	K.HGLEVIYMIEPIDEYCVQQLK.E	2577.27	-0.00079	3	1	63.55	0	2.97e-05	0|0	sp|P07900|HS90A_HUMAN/tr|Q2VPJ6|Q2VPJ6_HUMAN/tr|O75322|O75322_HUMAN/tr|Q96HX7|Q96HX7_HUMAN/tr|K9JA46|K9JA46_HUMAN/tr|Q8TBA7|Q8TBA7_HUMAN/tr|Q86U12|Q86U12_HUMAN		4.4	0		0	2	MASCOT		T
	R20180100087_1,10642	K.HIYYITGETK.D	1224.63	-0.00013	2	1	55.43	0	0.000209	0|0	sp|P07900|HS90A_HUMAN/sp|Q58FG0|HS905_HUMAN/tr|Q2VPJ6|Q2VPJ6_HUMAN/tr|O75322|O75322_HUMAN/tr|Q96HX7|Q96HX7_HUMAN/tr|K9JA46|K9JA46_HUMAN/tr|Q8TBA7|Q8TBA7_HUMAN/tr|Q86U12|Q86U12_HUMAN		6.75	0		0	2	MASCOT		T
	R20180100087_1,11226	K.HIYYITGETK.D	1224.63	0.00123	2	1	27.88	0	0.121	0|0	sp|P07900|HS90A_HUMAN/sp|Q58FG0|HS905_HUMAN/tr|Q2VPJ6|Q2VPJ6_HUMAN/tr|O75322|O75322_HUMAN/tr|Q96HX7|Q96HX7_HUMAN/tr|K9JA46|K9JA46_HUMAN/tr|Q8TBA7|Q8TBA7_HUMAN/tr|Q86U12|Q86U12_HUMAN		6.75	0		0	2	MASCOT		T
	R20180100087_1,20229	K.HLEINPDHSIIETLR.Q	1786.94	-0.00506	3	1	45.2	0	0.00532	0|0	sp|P07900|HS90A_HUMAN/tr|O75322|O75322_HUMAN/tr|Q96HX7|Q96HX7_HUMAN/tr|K9JA46|K9JA46_HUMAN/tr|Q8TBA7|Q8TBA7_HUMAN		5.27	0		0	2	MASCOT		T
	R20180100087_1,20358	K.HLEINPDHSIIETLR.Q	1786.94	-0.00153	2	1	85.07	0	2.69e-07	0|0	sp|P07900|HS90A_HUMAN/tr|O75322|O75322_HUMAN/tr|Q96HX7|Q96HX7_HUMAN/tr|K9JA46|K9JA46_HUMAN/tr|Q8TBA7|Q8TBA7_HUMAN		5.27	0		0	2	MASCOT		T
	R20180100087_1,20392	K.HLEINPDHSIIETLR.Q	1786.94	-0.0013	4	1	64.74	0	2.89e-05	0|0	sp|P07900|HS90A_HUMAN/tr|O75322|O75322_HUMAN/tr|Q96HX7|Q96HX7_HUMAN/tr|K9JA46|K9JA46_HUMAN/tr|Q8TBA7|Q8TBA7_HUMAN		5.27	0		0	2	MASCOT		T
	R20180100087_1,20183	K.HNDDEQYAWESSAGGSFTVR.T ! K.HNDDEQYAWESSAGGSFTVR.A	2255.96	-0.0151	2	1	80.25	0	4.62e-07	0|0	sp|Q14568|HS902_HUMAN/sp|P07900|HS90A_HUMAN/tr|Q2VPJ6|Q2VPJ6_HUMAN/tr|K9JA46|K9JA46_HUMAN/tr|Q8TBA7|Q8TBA7_HUMAN ! sp|P08238|HS90B_HUMAN/tr|A0A024RD80|A0A024RD80_HUMAN/tr|B4DGL0|B4DGL0_HUMAN/tr|Q6PK50|Q6PK50_HUMAN		4.31	0		0	2	MASCOT		T
	R20180100087_1,20191	K.HNDDEQYAWESSAGGSFTVR.T ! K.HNDDEQYAWESSAGGSFTVR.A	2255.96	0.00028	3	1	44.38	0	0.00048	0|0	sp|Q14568|HS902_HUMAN/sp|P07900|HS90A_HUMAN/tr|Q2VPJ6|Q2VPJ6_HUMAN/tr|K9JA46|K9JA46_HUMAN/tr|Q8TBA7|Q8TBA7_HUMAN ! sp|P08238|HS90B_HUMAN/tr|A0A024RD80|A0A024RD80_HUMAN/tr|B4DGL0|B4DGL0_HUMAN/tr|Q6PK50|Q6PK50_HUMAN		4.31	0		0	2	MASCOT		T
	R20180100087_1,20815	K.HNDDEQYAWESSAGGSFTVR.T ! K.HNDDEQYAWESSAGGSFTVR.A	2255.96	0.00697	3	1	62.37	0	6.61e-06	0|0	sp|Q14568|HS902_HUMAN/sp|P07900|HS90A_HUMAN/tr|Q2VPJ6|Q2VPJ6_HUMAN/tr|K9JA46|K9JA46_HUMAN/tr|Q8TBA7|Q8TBA7_HUMAN ! sp|P08238|HS90B_HUMAN/tr|A0A024RD80|A0A024RD80_HUMAN/tr|B4DGL0|B4DGL0_HUMAN/tr|Q6PK50|Q6PK50_HUMAN		4.31	0		0	2	MASCOT		T
	R20180100087_1,20816	K.HNDDEQYAWESSAGGSFTVR.T ! K.HNDDEQYAWESSAGGSFTVR.A	2255.96	0.0068	2	1	111.18	0	8.69e-11	0|0	sp|Q14568|HS902_HUMAN/sp|P07900|HS90A_HUMAN/tr|Q2VPJ6|Q2VPJ6_HUMAN/tr|K9JA46|K9JA46_HUMAN/tr|Q8TBA7|Q8TBA7_HUMAN ! sp|P08238|HS90B_HUMAN/tr|A0A024RD80|A0A024RD80_HUMAN/tr|B4DGL0|B4DGL0_HUMAN/tr|Q6PK50|Q6PK50_HUMAN		4.31	0		0	2	MASCOT		T
	R20180100087_1,21462	K.HNDDEQYAWESSAGGSFTVR.T ! K.HNDDEQYAWESSAGGSFTVR.A	2255.96	-0.00071	3	1	24.61	0	0.0457	0|0	sp|Q14568|HS902_HUMAN/sp|P07900|HS90A_HUMAN/tr|Q2VPJ6|Q2VPJ6_HUMAN/tr|K9JA46|K9JA46_HUMAN/tr|Q8TBA7|Q8TBA7_HUMAN ! sp|P08238|HS90B_HUMAN/tr|A0A024RD80|A0A024RD80_HUMAN/tr|B4DGL0|B4DGL0_HUMAN/tr|Q6PK50|Q6PK50_HUMAN		4.31	0		0	2	MASCOT		T
	R20180100087_1,21470	K.HNDDEQYAWESSAGGSFTVR.T ! K.HNDDEQYAWESSAGGSFTVR.A	2255.96	0.00422	2	1	81.7	0	8.21e-08	0|0	sp|Q14568|HS902_HUMAN/sp|P07900|HS90A_HUMAN/tr|Q2VPJ6|Q2VPJ6_HUMAN/tr|K9JA46|K9JA46_HUMAN/tr|Q8TBA7|Q8TBA7_HUMAN ! sp|P08238|HS90B_HUMAN/tr|A0A024RD80|A0A024RD80_HUMAN/tr|B4DGL0|B4DGL0_HUMAN/tr|Q6PK50|Q6PK50_HUMAN		4.31	0		0	2	MASCOT		T
	R20180100087_1,22163	K.HNDDEQYAWESSAGGSFTVR.T ! K.HNDDEQYAWESSAGGSFTVR.A	2255.96	0.0011	2	1	41.08	0	0.00323	0|0	sp|Q14568|HS902_HUMAN/sp|P07900|HS90A_HUMAN/tr|Q2VPJ6|Q2VPJ6_HUMAN/tr|K9JA46|K9JA46_HUMAN/tr|Q8TBA7|Q8TBA7_HUMAN ! sp|P08238|HS90B_HUMAN/tr|A0A024RD80|A0A024RD80_HUMAN/tr|B4DGL0|B4DGL0_HUMAN/tr|Q6PK50|Q6PK50_HUMAN		4.31	0		0	2	MASCOT		T
	R20180100087_1,22769	K.HNDDEQYAWESSAGGSFTVR.T ! K.HNDDEQYAWESSAGGSFTVR.A	2255.96	-0.0029	2	1	49.87	0	0.000439	0|0	sp|Q14568|HS902_HUMAN/sp|P07900|HS90A_HUMAN/tr|Q2VPJ6|Q2VPJ6_HUMAN/tr|K9JA46|K9JA46_HUMAN/tr|Q8TBA7|Q8TBA7_HUMAN ! sp|P08238|HS90B_HUMAN/tr|A0A024RD80|A0A024RD80_HUMAN/tr|B4DGL0|B4DGL0_HUMAN/tr|Q6PK50|Q6PK50_HUMAN		4.31	0		0	2	MASCOT		T
	R20180100087_1,23432	K.HNDDEQYAWESSAGGSFTVR.T ! K.HNDDEQYAWESSAGGSFTVR.A	2255.96	0.0005	2	1	44.99	0	0.00132	0|0	sp|Q14568|HS902_HUMAN/sp|P07900|HS90A_HUMAN/tr|Q2VPJ6|Q2VPJ6_HUMAN/tr|K9JA46|K9JA46_HUMAN/tr|Q8TBA7|Q8TBA7_HUMAN ! sp|P08238|HS90B_HUMAN/tr|A0A024RD80|A0A024RD80_HUMAN/tr|B4DGL0|B4DGL0_HUMAN/tr|Q6PK50|Q6PK50_HUMAN		4.31	0		0	2	MASCOT		T
	R20180100087_1,23953	K.HNDDEQYAWESSAGGSFTVR.T ! K.HNDDEQYAWESSAGGSFTVR.A	2255.96	0.00124	3	1	46.82	0	0.000268	0|0	sp|Q14568|HS902_HUMAN/sp|P07900|HS90A_HUMAN/tr|Q2VPJ6|Q2VPJ6_HUMAN/tr|K9JA46|K9JA46_HUMAN/tr|Q8TBA7|Q8TBA7_HUMAN ! sp|P08238|HS90B_HUMAN/tr|A0A024RD80|A0A024RD80_HUMAN/tr|B4DGL0|B4DGL0_HUMAN/tr|Q6PK50|Q6PK50_HUMAN		4.31	0		0	2	MASCOT		T
	R20180100087_1,24739	K.HNDDEQYAWESSAGGSFTVR.T ! K.HNDDEQYAWESSAGGSFTVR.A	2255.96	0.00178	3	1	36.84	0	0.00264	0|0	sp|Q14568|HS902_HUMAN/sp|P07900|HS90A_HUMAN/tr|Q2VPJ6|Q2VPJ6_HUMAN/tr|K9JA46|K9JA46_HUMAN/tr|Q8TBA7|Q8TBA7_HUMAN ! sp|P08238|HS90B_HUMAN/tr|A0A024RD80|A0A024RD80_HUMAN/tr|B4DGL0|B4DGL0_HUMAN/tr|Q6PK50|Q6PK50_HUMAN		4.31	0		0	2	MASCOT		T
	R20180100087_1,25681	K.HNDDEQYAWESSAGGSFTVR.T ! K.HNDDEQYAWESSAGGSFTVR.A	2255.96	0.0063	2	1	52.1	0	0.000239	0|0	sp|Q14568|HS902_HUMAN/sp|P07900|HS90A_HUMAN/tr|Q2VPJ6|Q2VPJ6_HUMAN/tr|K9JA46|K9JA46_HUMAN/tr|Q8TBA7|Q8TBA7_HUMAN ! sp|P08238|HS90B_HUMAN/tr|A0A024RD80|A0A024RD80_HUMAN/tr|B4DGL0|B4DGL0_HUMAN/tr|Q6PK50|Q6PK50_HUMAN		4.31	0		0	2	MASCOT		T
	R20180100087_1,27994	K.HSQFIGYPITLFVEK.E ! K.HSQFIGYPITLFVEK.K	1778.95	-0.00046	3	1	31.93	0	0.0474	0|0	sp|P07900|HS90A_HUMAN/tr|Q2VPJ6|Q2VPJ6_HUMAN/tr|G3V2J8|G3V2J8_HUMAN/tr|K9JA46|K9JA46_HUMAN/tr|Q8TBA7|Q8TBA7_HUMAN/tr|Q86U12|Q86U12_HUMAN ! sp|Q58FG0|HS905_HUMAN		6.75	0		0	2	MASCOT		T
	R20180100087_1,27999	K.HSQFIGYPITLFVEK.E ! K.HSQFIGYPITLFVEK.K	1778.95	0.0004	2	1	80.42	0	6.59e-07	0|0	sp|P07900|HS90A_HUMAN/tr|Q2VPJ6|Q2VPJ6_HUMAN/tr|G3V2J8|G3V2J8_HUMAN/tr|K9JA46|K9JA46_HUMAN/tr|Q8TBA7|Q8TBA7_HUMAN/tr|Q86U12|Q86U12_HUMAN ! sp|Q58FG0|HS905_HUMAN		6.75	0		0	2	MASCOT		T
	R20180100087_1,22835	K.KCLELFTELAEDKENYK.K	2130.04	-0.00301	3	1	65.6	0	2.14e-05	0|0	sp|P07900|HS90A_HUMAN/tr|Q2VPJ6|Q2VPJ6_HUMAN/tr|O75322|O75322_HUMAN/tr|Q96HX7|Q96HX7_HUMAN/tr|K9JA46|K9JA46_HUMAN/tr|Q8TBA7|Q8TBA7_HUMAN/tr|Q58FF9|Q58FF9_HUMAN/tr|Q86U12|Q86U12_HUMAN		4.59	2		0	2	MASCOT		T
	R20180100087_1,22848	K.KCLELFTELAEDKENYK.K	2130.04	-0.00503	2	1	27.69	0	0.354	0|0	sp|P07900|HS90A_HUMAN/tr|Q2VPJ6|Q2VPJ6_HUMAN/tr|O75322|O75322_HUMAN/tr|Q96HX7|Q96HX7_HUMAN/tr|K9JA46|K9JA46_HUMAN/tr|Q8TBA7|Q8TBA7_HUMAN/tr|Q58FF9|Q58FF9_HUMAN/tr|Q86U12|Q86U12_HUMAN		4.59	2		0	2	MASCOT		T
	R20180100087_1,17431	K.KHLEINPDHSIIETLR.Q	1915.04	-0.0033	4	1	57.95	0	9e-05	0|0	sp|P07900|HS90A_HUMAN/tr|O75322|O75322_HUMAN/tr|Q96HX7|Q96HX7_HUMAN/tr|K9JA46|K9JA46_HUMAN/tr|Q8TBA7|Q8TBA7_HUMAN		6.01	1		0	2	MASCOT		T
	R20180100087_1,17464	K.KHLEINPDHSIIETLR.Q	1915.04	-0.0005	3	1	61.11	0	4.53e-05	0|0	sp|P07900|HS90A_HUMAN/tr|O75322|O75322_HUMAN/tr|Q96HX7|Q96HX7_HUMAN/tr|K9JA46|K9JA46_HUMAN/tr|Q8TBA7|Q8TBA7_HUMAN		6.01	1		0	2	MASCOT		T
	R20180100087_1,17473	K.KHLEINPDHSIIETLR.Q	1915.04	-0.00132	2	1	54.53	0	0.000201	0|0	sp|P07900|HS90A_HUMAN/tr|O75322|O75322_HUMAN/tr|Q96HX7|Q96HX7_HUMAN/tr|K9JA46|K9JA46_HUMAN/tr|Q8TBA7|Q8TBA7_HUMAN		6.01	1		0	2	MASCOT		T
	R20180100087_1,3587	K.LGIHEDSQNRK.K	1296.67	0.00037	4	1	23.89	0	0.319	0|0	sp|P07900|HS90A_HUMAN/tr|Q2VPJ6|Q2VPJ6_HUMAN/tr|O75322|O75322_HUMAN/tr|Q96HX7|Q96HX7_HUMAN/tr|K9JA46|K9JA46_HUMAN/tr|Q8TBA7|Q8TBA7_HUMAN/tr|Q86U12|Q86U12_HUMAN		6.75	1		0	2	MASCOT		T
	R20180100087_1,3594	K.LGIHEDSQNRK.K	1296.67	0.00154	2	1	35.93	0	0.0186	0|0	sp|P07900|HS90A_HUMAN/tr|Q2VPJ6|Q2VPJ6_HUMAN/tr|O75322|O75322_HUMAN/tr|Q96HX7|Q96HX7_HUMAN/tr|K9JA46|K9JA46_HUMAN/tr|Q8TBA7|Q8TBA7_HUMAN/tr|Q86U12|Q86U12_HUMAN		6.75	1		0	2	MASCOT		T
	R20180100087_1,16952	K.SLTNDWEDHLAVK.H	1527.74	0.00314	3	1	36.95	0	0.011	0|0	sp|P07900|HS90A_HUMAN/sp|P08238|HS90B_HUMAN/tr|A0A024RD80|A0A024RD80_HUMAN/tr|B4DGL0|B4DGL0_HUMAN/tr|Q6PK50|Q6PK50_HUMAN/tr|Q2VPJ6|Q2VPJ6_HUMAN/tr|O75322|O75322_HUMAN/tr|Q96HX7|Q96HX7_HUMAN/tr|K9JA46|K9JA46_HUMAN/tr|Q8TBA7|Q8TBA7_HUMAN/tr|Q86U12|Q86U12_HUMAN/tr|B4DMA2|B4DMA2_HUMAN		4.53	0		0	2	MASCOT		T
	R20180100087_1,16965	K.SLTNDWEDHLAVK.H	1527.74	0.00106	2	1	78.49	0	7.65e-07	0|0	sp|P07900|HS90A_HUMAN/sp|P08238|HS90B_HUMAN/tr|A0A024RD80|A0A024RD80_HUMAN/tr|B4DGL0|B4DGL0_HUMAN/tr|Q6PK50|Q6PK50_HUMAN/tr|Q2VPJ6|Q2VPJ6_HUMAN/tr|O75322|O75322_HUMAN/tr|Q96HX7|Q96HX7_HUMAN/tr|K9JA46|K9JA46_HUMAN/tr|Q8TBA7|Q8TBA7_HUMAN/tr|Q86U12|Q86U12_HUMAN/tr|B4DMA2|B4DMA2_HUMAN		4.53	0		0	2	MASCOT		T
	R20180100087_1,19879	K.SLTNDWEDHLAVK.H	1527.74	0.00119	3	1	44.86	0	0.00178	0|0	sp|P07900|HS90A_HUMAN/sp|P08238|HS90B_HUMAN/tr|A0A024RD80|A0A024RD80_HUMAN/tr|B4DGL0|B4DGL0_HUMAN/tr|Q6PK50|Q6PK50_HUMAN/tr|Q2VPJ6|Q2VPJ6_HUMAN/tr|O75322|O75322_HUMAN/tr|Q96HX7|Q96HX7_HUMAN/tr|K9JA46|K9JA46_HUMAN/tr|Q8TBA7|Q8TBA7_HUMAN/tr|Q86U12|Q86U12_HUMAN/tr|B4DMA2|B4DMA2_HUMAN		4.53	0		0	2	MASCOT		T
	R20180100087_1,19881	K.SLTNDWEDHLAVK.H	1527.74	-0.00076	2	1	78.33	0	8.31e-07	0|0	sp|P07900|HS90A_HUMAN/sp|P08238|HS90B_HUMAN/tr|A0A024RD80|A0A024RD80_HUMAN/tr|B4DGL0|B4DGL0_HUMAN/tr|Q6PK50|Q6PK50_HUMAN/tr|Q2VPJ6|Q2VPJ6_HUMAN/tr|O75322|O75322_HUMAN/tr|Q96HX7|Q96HX7_HUMAN/tr|K9JA46|K9JA46_HUMAN/tr|Q8TBA7|Q8TBA7_HUMAN/tr|Q86U12|Q86U12_HUMAN/tr|B4DMA2|B4DMA2_HUMAN		4.53	0		0	2	MASCOT		T
	R20180100087_1,21395	K.SLTNDWEDHLAVK.H	1527.74	-0.00331	3	1	25.01	0	0.184	0|0	sp|P07900|HS90A_HUMAN/sp|P08238|HS90B_HUMAN/tr|A0A024RD80|A0A024RD80_HUMAN/tr|B4DGL0|B4DGL0_HUMAN/tr|Q6PK50|Q6PK50_HUMAN/tr|Q2VPJ6|Q2VPJ6_HUMAN/tr|O75322|O75322_HUMAN/tr|Q96HX7|Q96HX7_HUMAN/tr|K9JA46|K9JA46_HUMAN/tr|Q8TBA7|Q8TBA7_HUMAN/tr|Q86U12|Q86U12_HUMAN/tr|B4DMA2|B4DMA2_HUMAN		4.53	0		0	2	MASCOT		T
	R20180100087_1,32509	K.SLTNDWEDHLAVK.H	1527.74	-0.00187	3	1	24.46	0	0.207	0|0	sp|P07900|HS90A_HUMAN/sp|P08238|HS90B_HUMAN/tr|A0A024RD80|A0A024RD80_HUMAN/tr|B4DGL0|B4DGL0_HUMAN/tr|Q6PK50|Q6PK50_HUMAN/tr|Q2VPJ6|Q2VPJ6_HUMAN/tr|O75322|O75322_HUMAN/tr|Q96HX7|Q96HX7_HUMAN/tr|K9JA46|K9JA46_HUMAN/tr|Q8TBA7|Q8TBA7_HUMAN/tr|Q86U12|Q86U12_HUMAN/tr|B4DMA2|B4DMA2_HUMAN		4.53	0		0	2	MASCOT		T
	R20180100087_1,7692	K.TLVSVTK.E	747.461	0.00038	2	1	45.68	0	0.000945	0|0	sp|P07900|HS90A_HUMAN/sp|Q58FG1|HS904_HUMAN/tr|Q2VPJ6|Q2VPJ6_HUMAN/tr|O75322|O75322_HUMAN/tr|Q96HX7|Q96HX7_HUMAN/tr|K9JA46|K9JA46_HUMAN/tr|Q8TBA7|Q8TBA7_HUMAN/tr|Q86U12|Q86U12_HUMAN		8.41	0		0	2	MASCOT		T
	R20180100087_1,9384	K.YIDQEELNK.T	1151.56	-0.00095	2	1	56.26	0	0.000159	0|0	sp|Q58FF8|H90B2_HUMAN/sp|Q14568|HS902_HUMAN/sp|P07900|HS90A_HUMAN/sp|P08238|HS90B_HUMAN/tr|A0A024RD80|A0A024RD80_HUMAN/tr|B4DGL0|B4DGL0_HUMAN/tr|Q6PK50|Q6PK50_HUMAN/tr|Q2VPJ6|Q2VPJ6_HUMAN/tr|O75322|O75322_HUMAN/tr|K9JA46|K9JA46_HUMAN/tr|Q8TBA7|Q8TBA7_HUMAN/tr|Q86U12|Q86U12_HUMAN/tr|B4DMA2|B4DMA2_HUMAN		4.14	0		0	2	MASCOT		T
	R20180100087_1,24630	R.APFDLFENR.K	1108.54	0.00047	1	1	45.95	0	0.00525	0|0	sp|P07900|HS90A_HUMAN/tr|Q2VPJ6|Q2VPJ6_HUMAN/tr|O75322|O75322_HUMAN/tr|Q96HX7|Q96HX7_HUMAN/tr|K9JA46|K9JA46_HUMAN/tr|Q8TBA7|Q8TBA7_HUMAN/tr|Q86U12|Q86U12_HUMAN		4.37	0		0	2	MASCOT		T
	R20180100087_1,24642	R.APFDLFENR.K	1108.54	-0.00079	2	1	51.46	0	0.000458	0|0	sp|P07900|HS90A_HUMAN/tr|Q2VPJ6|Q2VPJ6_HUMAN/tr|O75322|O75322_HUMAN/tr|Q96HX7|Q96HX7_HUMAN/tr|K9JA46|K9JA46_HUMAN/tr|Q8TBA7|Q8TBA7_HUMAN/tr|Q86U12|Q86U12_HUMAN		4.37	0		0	2	MASCOT		T
	R20180100087_1,4024	R.DNSTM*GYM*AAK.K	1220.49	-0.00294	2	1	34.84	0	0.00243	0|0	sp|P07900|HS90A_HUMAN/tr|O75322|O75322_HUMAN/tr|Q96HX7|Q96HX7_HUMAN/tr|K9JA46|K9JA46_HUMAN/tr|Q8TBA7|Q8TBA7_HUMAN		5.84	0	15.994919 Oxidation (M)	0	2	MASCOT		T
	R20180100087_1,6573	R.DNSTMGYM*AAK.K	1204.5	-0.00086	2	1	20.75	0	0.0555	0|0	sp|P07900|HS90A_HUMAN/tr|O75322|O75322_HUMAN/tr|Q96HX7|Q96HX7_HUMAN/tr|K9JA46|K9JA46_HUMAN/tr|Q8TBA7|Q8TBA7_HUMAN		5.84	0	15.994919 Oxidation (M)	0	2	MASCOT		T
	R20180100087_1,10579	R.DNSTMGYMAAK.K	1188.5	-0.00028	2	1	59.14	0	9.26e-06	0|0	sp|P07900|HS90A_HUMAN/tr|O75322|O75322_HUMAN/tr|Q96HX7|Q96HX7_HUMAN/tr|K9JA46|K9JA46_HUMAN/tr|Q8TBA7|Q8TBA7_HUMAN		5.84	0		0	2	MASCOT		T
	R20180100087_1,12450	R.ELISNSSDALDK.I	1291.64	-0.00105	2	1	75.97	0	1.93e-06	0|0	sp|Q14568|HS902_HUMAN/sp|P07900|HS90A_HUMAN/tr|Q2VPJ6|Q2VPJ6_HUMAN/tr|G3V2J8|G3V2J8_HUMAN/tr|K9JA46|K9JA46_HUMAN/tr|B4DTA5|B4DTA5_HUMAN/tr|Q86SX1|Q86SX1_HUMAN		4.03	0		0	2	MASCOT		T
	R20180100087_1,17067	R.ELISNSSDALDKIR.Y	1560.82	-0.00059	2	1	70.5	0	8.07e-06	0|0	sp|P07900|HS90A_HUMAN/tr|Q2VPJ6|Q2VPJ6_HUMAN/tr|G3V2J8|G3V2J8_HUMAN/tr|K9JA46|K9JA46_HUMAN/tr|B4DTA5|B4DTA5_HUMAN/tr|Q86SX1|Q86SX1_HUMAN		4.56	1		0	2	MASCOT		T
	R20180100087_1,2461	R.EM*LQQSK.I	879.424	0.00038	2	1	38.76	0	0.00778	0|0	sp|Q58FF7|H90B3_HUMAN/sp|P07900|HS90A_HUMAN/sp|P08238|HS90B_HUMAN/tr|A0A024RD80|A0A024RD80_HUMAN/tr|B4DGL0|B4DGL0_HUMAN/tr|Q2VPJ6|Q2VPJ6_HUMAN/tr|O75322|O75322_HUMAN/tr|Q96HX7|Q96HX7_HUMAN/tr|K9JA46|K9JA46_HUMAN/tr|Q8TBA7|Q8TBA7_HUMAN/tr|A8K3W9|A8K3W9_HUMAN/tr|Q9H6X9|Q9H6X9_HUMAN/tr|Q86U12|Q86U12_HUMAN/tr|B4DMA2|B4DMA2_HUMAN		6.1	0	15.994919 Oxidation (M)	0	2	MASCOT		T
	R20180100087_1,3936	R.EMLQQSK.I	863.429	-0.0004	2	1	26.55	0	0.15	0|0	sp|Q58FF7|H90B3_HUMAN/sp|P07900|HS90A_HUMAN/sp|P08238|HS90B_HUMAN/tr|A0A024RD80|A0A024RD80_HUMAN/tr|B4DGL0|B4DGL0_HUMAN/tr|Q2VPJ6|Q2VPJ6_HUMAN/tr|O75322|O75322_HUMAN/tr|Q96HX7|Q96HX7_HUMAN/tr|K9JA46|K9JA46_HUMAN/tr|Q8TBA7|Q8TBA7_HUMAN/tr|A8K3W9|A8K3W9_HUMAN/tr|Q9H6X9|Q9H6X9_HUMAN/tr|Q86U12|Q86U12_HUMAN/tr|B4DMA2|B4DMA2_HUMAN		6.1	0		0	2	MASCOT		T
	R20180100087_1,22015	R.GVVDSEDIPLNLSR.E ! R.GVVDSEDLPLNISR.E	1513.79	0.00345	2	1	57.95	0	0.000135	0|0	sp|Q12931|TRAP1_HUMAN/tr|Q8N9Z3|Q8N9Z3_HUMAN/tr|Q9BV61|Q9BV61_HUMAN/tr|I3L0K7|I3L0K7_HUMAN/tr|Q53G55|Q53G55_HUMAN/tr|A0A140VJY2|A0A140VJY2_HUMAN/tr|I3L239|I3L239_HUMAN/tr|Q53FS6|Q53FS6_HUMAN ! sp|P07900|HS90A_HUMAN/sp|P08238|HS90B_HUMAN/tr|A0A024RD80|A0A024RD80_HUMAN/tr|B4DGL0|B4DGL0_HUMAN/tr|Q2VPJ6|Q2VPJ6_HUMAN/tr|O75322|O75322_HUMAN/tr|Q96HX7|Q96HX7_HUMAN/tr|K9JA46|K9JA46_HUMAN/tr|Q8TBA7|Q8TBA7…		4.03	0		0	2	MASCOT		T
	R20180100087_1,22672	R.GVVDSEDIPLNLSR.E ! R.GVVDSEDLPLNISR.E	1513.79	-0.00247	2	1	61.43	0	0.000151	0|0	sp|Q12931|TRAP1_HUMAN/tr|Q8N9Z3|Q8N9Z3_HUMAN/tr|Q9BV61|Q9BV61_HUMAN/tr|I3L0K7|I3L0K7_HUMAN/tr|Q53G55|Q53G55_HUMAN/tr|A0A140VJY2|A0A140VJY2_HUMAN/tr|I3L239|I3L239_HUMAN/tr|Q53FS6|Q53FS6_HUMAN ! sp|P07900|HS90A_HUMAN/sp|P08238|HS90B_HUMAN/tr|A0A024RD80|A0A024RD80_HUMAN/tr|B4DGL0|B4DGL0_HUMAN/tr|Q2VPJ6|Q2VPJ6_HUMAN/tr|O75322|O75322_HUMAN/tr|Q96HX7|Q96HX7_HUMAN/tr|K9JA46|K9JA46_HUMAN/tr|Q8TBA7|Q8TBA7…		4.03	0		0	2	MASCOT		T
	R20180100087_1,27436	R.LVTSPCCIVTSTYGWTANMER.I	2446.12	-0.00297	2	1	105.81	0	1.17e-09	0|0	sp|P07900|HS90A_HUMAN/tr|O75322|O75322_HUMAN/tr|Q96HX7|Q96HX7_HUMAN/tr|K9JA46|K9JA46_HUMAN/tr|Q8TBA7|Q8TBA7_HUMAN		5.99	0		0	2	MASCOT		T
	R20180100087_1,19023	R.NPDDITNEEYGEFYK.S	1833.78	0.00282	2	1	94.49	0	4.45e-09	0|0	sp|P07900|HS90A_HUMAN/tr|Q2VPJ6|Q2VPJ6_HUMAN/tr|O75322|O75322_HUMAN/tr|K9JA46|K9JA46_HUMAN/tr|Q8TBA7|Q8TBA7_HUMAN/tr|Q86U12|Q86U12_HUMAN		3.83	0		0	2	MASCOT		T
	R20180100087_1,19660	R.NPDDITNEEYGEFYK.S	1833.78	0.00064	2	1	87.87	0	2.09e-08	0|0	sp|P07900|HS90A_HUMAN/tr|Q2VPJ6|Q2VPJ6_HUMAN/tr|O75322|O75322_HUMAN/tr|K9JA46|K9JA46_HUMAN/tr|Q8TBA7|Q8TBA7_HUMAN/tr|Q86U12|Q86U12_HUMAN		3.83	0		0	2	MASCOT		T
	R20180100087_1,22072	R.RAPFDLFENR.K	1264.64	0.00323	3	1	32.47	0	0.0775	0|0	sp|P07900|HS90A_HUMAN/tr|Q2VPJ6|Q2VPJ6_HUMAN/tr|O75322|O75322_HUMAN/tr|Q96HX7|Q96HX7_HUMAN/tr|K9JA46|K9JA46_HUMAN/tr|Q8TBA7|Q8TBA7_HUMAN/tr|Q86U12|Q86U12_HUMAN		6.07	1		0	2	MASCOT		T
	R20180100087_1,2590	R.TDTGEPM*GR.G	979.415	-0.00044	2	1	45.09	0	0.00051	0|0	sp|P07900|HS90A_HUMAN/tr|Q2VPJ6|Q2VPJ6_HUMAN/tr|K9JA46|K9JA46_HUMAN/tr|Q8TBA7|Q8TBA7_HUMAN		4.37	0	15.994919 Oxidation (M)	0	2	MASCOT		T
	R20180100087_1,4279	R.TDTGEPMGR.G	963.42	0.00088	2	1	58.2	0	3.48e-05	0|0	sp|P07900|HS90A_HUMAN/tr|Q2VPJ6|Q2VPJ6_HUMAN/tr|K9JA46|K9JA46_HUMAN/tr|Q8TBA7|Q8TBA7_HUMAN		4.37	0		0	2	MASCOT		T
	R20180100087_1,18602	R.TLTIVDTGIGM*TK.A ! R.TLTLVDTGIGM*TK.A	1365.73	-0.00211	2	1	51.82	0	0.00103	0|0	sp|P07900|HS90A_HUMAN/sp|Q58FG1|HS904_HUMAN/tr|Q2VPJ6|Q2VPJ6_HUMAN/tr|G3V2J8|G3V2J8_HUMAN/tr|K9JA46|K9JA46_HUMAN/tr|B4DTA5|B4DTA5_HUMAN/tr|Q86SX1|Q86SX1_HUMAN ! sp|P08238|HS90B_HUMAN/tr|A0A024RD80|A0A024RD80_HUMAN/tr|B4DGL0|B4DGL0_HUMAN/tr|Q6PK50|Q6PK50_HUMAN/tr|O14942|O14942_HUMAN/tr|B4DMA2|B4DMA2_HUMAN		5.5	0	15.994919 Oxidation (M)	0	2	MASCOT		T
	R20180100087_1,19308	R.TLTIVDTGIGM*TK.A ! R.TLTLVDTGIGM*TK.A	1365.73	-0.00083	2	1	64.99	0	2.28e-05	0|0	sp|P07900|HS90A_HUMAN/sp|Q58FG1|HS904_HUMAN/tr|Q2VPJ6|Q2VPJ6_HUMAN/tr|G3V2J8|G3V2J8_HUMAN/tr|K9JA46|K9JA46_HUMAN/tr|B4DTA5|B4DTA5_HUMAN/tr|Q86SX1|Q86SX1_HUMAN ! sp|P08238|HS90B_HUMAN/tr|A0A024RD80|A0A024RD80_HUMAN/tr|B4DGL0|B4DGL0_HUMAN/tr|Q6PK50|Q6PK50_HUMAN/tr|O14942|O14942_HUMAN/tr|B4DMA2|B4DMA2_HUMAN		5.5	0	15.994919 Oxidation (M)	0	2	MASCOT		T
	R20180100087_1,22077	R.TLTIVDTGIGMTK.A ! R.TLTLVDTGIGMTK.A	1349.73	0.00145	2	1	78.69	0	1.93e-06	0|0	sp|P07900|HS90A_HUMAN/sp|Q58FG1|HS904_HUMAN/tr|Q2VPJ6|Q2VPJ6_HUMAN/tr|G3V2J8|G3V2J8_HUMAN/tr|K9JA46|K9JA46_HUMAN/tr|B4DTA5|B4DTA5_HUMAN/tr|Q86SX1|Q86SX1_HUMAN ! sp|P08238|HS90B_HUMAN/tr|A0A024RD80|A0A024RD80_HUMAN/tr|B4DGL0|B4DGL0_HUMAN/tr|Q6PK50|Q6PK50_HUMAN/tr|O14942|O14942_HUMAN/tr|B4DMA2|B4DMA2_HUMAN		5.5	0		0	2	MASCOT		T
	R20180100087_1,22724	R.TLTIVDTGIGMTK.A ! R.TLTLVDTGIGMTK.A	1349.73	-5e-05	2	1	78.2	0	2.19e-06	0|0	sp|P07900|HS90A_HUMAN/sp|Q58FG1|HS904_HUMAN/tr|Q2VPJ6|Q2VPJ6_HUMAN/tr|G3V2J8|G3V2J8_HUMAN/tr|K9JA46|K9JA46_HUMAN/tr|B4DTA5|B4DTA5_HUMAN/tr|Q86SX1|Q86SX1_HUMAN ! sp|P08238|HS90B_HUMAN/tr|A0A024RD80|A0A024RD80_HUMAN/tr|B4DGL0|B4DGL0_HUMAN/tr|Q6PK50|Q6PK50_HUMAN/tr|O14942|O14942_HUMAN/tr|B4DMA2|B4DMA2_HUMAN		5.5	0		0	2	MASCOT		T
	R20180100087_1,22853	R.TLTIVDTGIGMTK.A ! R.TLTLVDTGIGMTK.A	1349.73	-0.00111	2	1	73.79	0	6.05e-06	0|0	sp|P07900|HS90A_HUMAN/sp|Q58FG1|HS904_HUMAN/tr|Q2VPJ6|Q2VPJ6_HUMAN/tr|G3V2J8|G3V2J8_HUMAN/tr|K9JA46|K9JA46_HUMAN/tr|B4DTA5|B4DTA5_HUMAN/tr|Q86SX1|Q86SX1_HUMAN ! sp|P08238|HS90B_HUMAN/tr|A0A024RD80|A0A024RD80_HUMAN/tr|B4DGL0|B4DGL0_HUMAN/tr|Q6PK50|Q6PK50_HUMAN/tr|O14942|O14942_HUMAN/tr|B4DMA2|B4DMA2_HUMAN		5.5	0		0	2	MASCOT		T
	R20180100087_1,29976	R.VFIM*DNCEELIPEYLNFIR.G	2431.17	0.00046	2	1	109.93	0	7.5e-10	0|0	sp|P07900|HS90A_HUMAN/tr|Q2VPJ6|Q2VPJ6_HUMAN/tr|O75322|O75322_HUMAN/tr|Q96HX7|Q96HX7_HUMAN/tr|K9JA46|K9JA46_HUMAN/tr|Q8TBA7|Q8TBA7_HUMAN/tr|Q86U12|Q86U12_HUMAN		4	0	15.994919 Oxidation (M)	0	2	MASCOT		T
	R20180100087_1,29985	R.VFIM*DNCEELIPEYLNFIR.G	2431.17	0.00326	3	1	57.23	0	0.000115	0|0	sp|P07900|HS90A_HUMAN/tr|Q2VPJ6|Q2VPJ6_HUMAN/tr|O75322|O75322_HUMAN/tr|Q96HX7|Q96HX7_HUMAN/tr|K9JA46|K9JA46_HUMAN/tr|Q8TBA7|Q8TBA7_HUMAN/tr|Q86U12|Q86U12_HUMAN		4	0	15.994919 Oxidation (M)	0	2	MASCOT		T
	R20180100087_1,30684	R.VFIMDNCEELIPEYLNFIR.G	2415.17	-0.00122	2	1	120.82	0	9e-11	0|0	sp|P07900|HS90A_HUMAN/tr|Q2VPJ6|Q2VPJ6_HUMAN/tr|O75322|O75322_HUMAN/tr|Q96HX7|Q96HX7_HUMAN/tr|K9JA46|K9JA46_HUMAN/tr|Q8TBA7|Q8TBA7_HUMAN/tr|Q86U12|Q86U12_HUMAN		4	0		0	2	MASCOT		T
	R20180100087_1,30813	R.VFIMDNCEELIPEYLNFIR.G	2415.17	0.00452	3	1	44.41	0	0.00393	0|0	sp|P07900|HS90A_HUMAN/tr|Q2VPJ6|Q2VPJ6_HUMAN/tr|O75322|O75322_HUMAN/tr|Q96HX7|Q96HX7_HUMAN/tr|K9JA46|K9JA46_HUMAN/tr|Q8TBA7|Q8TBA7_HUMAN/tr|Q86U12|Q86U12_HUMAN		4	0		0	2	MASCOT		T
	R20180100087_1,8073	R.YESLTDPSK.L	1039.49	-9e-05	2	1	47.98	0	0.00118	0|0	sp|Q58FF7|H90B3_HUMAN/sp|Q58FF8|H90B2_HUMAN/sp|P07900|HS90A_HUMAN/sp|Q58FF6|H90B4_HUMAN/sp|P08238|HS90B_HUMAN/tr|A0A024RD80|A0A024RD80_HUMAN/tr|Q6PK50|Q6PK50_HUMAN/tr|Q2VPJ6|Q2VPJ6_HUMAN/tr|G3V2J8|G3V2J8_HUMAN/tr|K9JA46|K9JA46_HUMAN/tr|O14942|O14942_HUMAN/tr|B4DTA5|B4DTA5_HUMAN/tr|Q86SX1|Q86SX1_HUMAN/tr|B4DMA2|B4DMA2_HUMAN		4.37	0		0	2	MASCOT		T
	R20180100087_1,12457	R.YESLTDPSKLDSGK.E	1539.75	0.00013	3	1	36.81	0	0.0151	0|0	sp|Q58FF7|H90B3_HUMAN/sp|Q58FF8|H90B2_HUMAN/sp|P07900|HS90A_HUMAN/sp|P08238|HS90B_HUMAN/tr|A0A024RD80|A0A024RD80_HUMAN/tr|Q6PK50|Q6PK50_HUMAN/tr|Q2VPJ6|Q2VPJ6_HUMAN/tr|G3V2J8|G3V2J8_HUMAN/tr|K9JA46|K9JA46_HUMAN/tr|O14942|O14942_HUMAN/tr|B4DTA5|B4DTA5_HUMAN/tr|Q86SX1|Q86SX1_HUMAN/tr|B4DMA2|B4DMA2_HUMAN		4.56	1		0	2	MASCOT		T
	R20180100087_1,16593	R.YYTSASGDEMVSLK.D	1550.7	0.00596	2	1	88.1	0	5.46e-08	0|0	sp|P07900|HS90A_HUMAN/tr|Q2VPJ6|Q2VPJ6_HUMAN/tr|O75322|O75322_HUMAN/tr|Q96HX7|Q96HX7_HUMAN/tr|K9JA46|K9JA46_HUMAN/tr|Q8TBA7|Q8TBA7_HUMAN/tr|Q86U12|Q86U12_HUMAN		4.37	0		0	2	MASCOT		T
	R20180100087_1,17816	R.YYTSASGDEMVSLK.D	1550.7	-0.00204	2	1	80.83	0	3.37e-07	0|0	sp|P07900|HS90A_HUMAN/tr|Q2VPJ6|Q2VPJ6_HUMAN/tr|O75322|O75322_HUMAN/tr|Q96HX7|Q96HX7_HUMAN/tr|K9JA46|K9JA46_HUMAN/tr|Q8TBA7|Q8TBA7_HUMAN/tr|Q86U12|Q86U12_HUMAN		4.37	0		0	2	MASCOT		T
	R20180100087_1,18565	R.YYTSASGDEMVSLK.D	1550.7	0.01556	2	1	51.94	0	0.00017	0|0	sp|P07900|HS90A_HUMAN/tr|Q2VPJ6|Q2VPJ6_HUMAN/tr|O75322|O75322_HUMAN/tr|Q96HX7|Q96HX7_HUMAN/tr|K9JA46|K9JA46_HUMAN/tr|Q8TBA7|Q8TBA7_HUMAN/tr|Q86U12|Q86U12_HUMAN		4.37	0		0	2	MASCOT		T
$5-1	sp|P08238|HS90B_HUMAN Heat shock protein HSP 90-beta OS=Homo sapiens GN=HSP90AB1 PE=1 SV=4	84	45	0.6354	83263.2	4.97
$5-2	tr|A0A024RD80|A0A024RD80_HUMAN Heat shock protein 90kDa alpha (Cytosolic), class B member 1, isoform CRA_a OS=Homo sapiens GN=HSP90AB1 PE=3 SV=1	84	45	0.6354	83263.2	4.97
	R20180100087_1,22014	K.ADLINNLGTIAK.F ! K.ADLINNLGTIAK.S	1242.71	0.00143	2	1	76.58	0	3.04e-06	0|0	sp|Q58FF8|H90B2_HUMAN ! sp|Q14568|HS902_HUMAN/sp|P07900|HS90A_HUMAN/sp|P08238|HS90B_HUMAN/tr|A0A024RD80|A0A024RD80_HUMAN/tr|B4DGL0|B4DGL0_HUMAN/tr|Q6PK50|Q6PK50_HUMAN/tr|Q2VPJ6|Q2VPJ6_HUMAN/tr|K9JA46|K9JA46_HUMAN/tr|O14942|O14942_HUMAN/tr|Q8TBA7|Q8TBA7_HUMAN/tr|B4DTA5|B4DTA5_HUMAN/tr|Q86SX1|Q86SX1_HUMAN/tr|B4DMA2|B4DMA2_HUMAN		5.88	0		0	2	MASCOT		T
	R20180100087_1,21025	K.ADLINNLGTIAKSGTK.A	1615.9	-0.00529	3	1	35.49	0	0.0158	0|0	sp|Q14568|HS902_HUMAN/sp|P07900|HS90A_HUMAN/sp|P08238|HS90B_HUMAN/tr|A0A024RD80|A0A024RD80_HUMAN/tr|B4DGL0|B4DGL0_HUMAN/tr|Q6PK50|Q6PK50_HUMAN/tr|Q2VPJ6|Q2VPJ6_HUMAN/tr|K9JA46|K9JA46_HUMAN/tr|O14942|O14942_HUMAN/tr|Q8TBA7|Q8TBA7_HUMAN/tr|B4DTA5|B4DTA5_HUMAN/tr|Q86SX1|Q86SX1_HUMAN/tr|B4DMA2|B4DMA2_HUMAN		8.64	1		0	2	MASCOT		T
	R20180100087_1,32844	K.AFMEALQAGADISMIGQFGVGFYSAYLVAEK.V	3284.6	-0.00042	3	1	63.87	0	2.47e-05	0|0	sp|P07900|HS90A_HUMAN/sp|P08238|HS90B_HUMAN/tr|A0A024RD80|A0A024RD80_HUMAN/tr|Q6PK50|Q6PK50_HUMAN/tr|Q2VPJ6|Q2VPJ6_HUMAN/tr|K9JA46|K9JA46_HUMAN/tr|Q8TBA7|Q8TBA7_HUMAN/tr|B4DTA5|B4DTA5_HUMAN/tr|B4DMA2|B4DMA2_HUMAN		4.14	0		0	2	MASCOT		T
	R20180100087_1,26193	K.CLELFSELAEDKENYK.K	1987.93	-0.00198	2	1	81.58	0	3.86e-07	0|0	sp|P08238|HS90B_HUMAN/tr|A0A024RD80|A0A024RD80_HUMAN/tr|B4DGL0|B4DGL0_HUMAN/tr|A8K3W9|A8K3W9_HUMAN/tr|Q9H6X9|Q9H6X9_HUMAN/tr|B4DMA2|B4DMA2_HUMAN		4.25	1		0	2	MASCOT		T
	R20180100087_1,26211	K.CLELFSELAEDKENYK.K	1987.93	-0.00305	3	1	59.75	0	5.94e-05	0|0	sp|P08238|HS90B_HUMAN/tr|A0A024RD80|A0A024RD80_HUMAN/tr|B4DGL0|B4DGL0_HUMAN/tr|A8K3W9|A8K3W9_HUMAN/tr|Q9H6X9|Q9H6X9_HUMAN/tr|B4DMA2|B4DMA2_HUMAN		4.25	1		0	2	MASCOT		T
	R20180100087_1,23412	K.CLELFSELAEDKENYKK.F	2116.03	0.00431	2	1	91.31	0	1.36e-07	0|0	sp|P08238|HS90B_HUMAN/tr|A0A024RD80|A0A024RD80_HUMAN/tr|B4DGL0|B4DGL0_HUMAN/tr|A8K3W9|A8K3W9_HUMAN/tr|Q9H6X9|Q9H6X9_HUMAN/tr|B4DMA2|B4DMA2_HUMAN		4.59	2		0	2	MASCOT		T
	R20180100087_1,23622	K.CLELFSELAEDKENYKK.F	2116.03	-0.00078	3	1	33.34	0	0.0399	0|0	sp|P08238|HS90B_HUMAN/tr|A0A024RD80|A0A024RD80_HUMAN/tr|B4DGL0|B4DGL0_HUMAN/tr|A8K3W9|A8K3W9_HUMAN/tr|Q9H6X9|Q9H6X9_HUMAN/tr|B4DMA2|B4DMA2_HUMAN		4.59	2		0	2	MASCOT		T
	R20180100087_1,11072	K.EDQTEYLEER.R ! K.EDQTEYLEER.W	1311.57	0.0006	2	1	59.76	0	2.39e-05	0|0	sp|Q58FF7|H90B3_HUMAN/sp|P07900|HS90A_HUMAN/sp|P08238|HS90B_HUMAN/tr|A0A024RD80|A0A024RD80_HUMAN/tr|B4DGL0|B4DGL0_HUMAN/tr|Q6PK50|Q6PK50_HUMAN/tr|Q2VPJ6|Q2VPJ6_HUMAN/tr|G3V2J8|G3V2J8_HUMAN/tr|K9JA46|K9JA46_HUMAN/tr|Q8TBA7|Q8TBA7_HUMAN/tr|Q86U12|Q86U12_HUMAN/tr|B4DMA2|B4DMA2_HUMAN ! sp|Q58FF6|H90B4_HUMAN		3.91	0		0	2	MASCOT		T
	R20180100087_1,15329	K.EGLELPEDEEEK.K	1416.64	0.00267	2	1	31.33	0	0.0206	0|0	sp|Q58FF7|H90B3_HUMAN/sp|P07900|HS90A_HUMAN/sp|Q58FF6|H90B4_HUMAN/sp|Q58FG0|HS905_HUMAN/sp|P08238|HS90B_HUMAN/tr|A0A024RD80|A0A024RD80_HUMAN/tr|B4DGL0|B4DGL0_HUMAN/tr|Q2VPJ6|Q2VPJ6_HUMAN/tr|O75322|O75322_HUMAN/tr|Q96HX7|Q96HX7_HUMAN/tr|K9JA46|K9JA46_HUMAN/tr|Q8TBA7|Q8TBA7_HUMAN/tr|A8K3W9|A8K3W9_HUMAN/tr|Q9H6X9|Q9H6X9_HUMAN/tr|Q86U12|Q86U12_HUMAN/tr|B4DMA2|B4DMA2_HUMAN		3.77	0		0	2	MASCOT		T
	R20180100087_1,12832	K.EGLELPEDEEEKK.K ! K.EGLELPEDEEEKK.I	1544.73	-0.00122	3	1	29.37	0	0.0616	0|0	sp|Q58FF7|H90B3_HUMAN/sp|P07900|HS90A_HUMAN/sp|Q58FG0|HS905_HUMAN/sp|P08238|HS90B_HUMAN/tr|A0A024RD80|A0A024RD80_HUMAN/tr|B4DGL0|B4DGL0_HUMAN/tr|Q2VPJ6|Q2VPJ6_HUMAN/tr|O75322|O75322_HUMAN/tr|Q96HX7|Q96HX7_HUMAN/tr|K9JA46|K9JA46_HUMAN/tr|Q8TBA7|Q8TBA7_HUMAN/tr|A8K3W9|A8K3W9_HUMAN/tr|Q9H6X9|Q9H6X9_HUMAN/tr|Q86U12|Q86U12_HUMAN/tr|B4DMA2|B4DMA2_HUMAN ! sp|Q58FF6|H90B4_HUMAN		4.06	1		0	2	MASCOT		T
	R20180100087_1,10541	K.EGLELPEDEEEKKK.M ! K.EGLELPEDEEEKKK.Q	1672.83	-0.00194	3	1	35.74	0	0.0226	0|0	sp|Q58FF7|H90B3_HUMAN/sp|P08238|HS90B_HUMAN/tr|A0A024RD80|A0A024RD80_HUMAN/tr|B4DGL0|B4DGL0_HUMAN/tr|A8K3W9|A8K3W9_HUMAN/tr|Q9H6X9|Q9H6X9_HUMAN/tr|B4DMA2|B4DMA2_HUMAN ! sp|P07900|HS90A_HUMAN/sp|Q58FG0|HS905_HUMAN/tr|Q2VPJ6|Q2VPJ6_HUMAN/tr|O75322|O75322_HUMAN/tr|Q96HX7|Q96HX7_HUMAN/tr|K9JA46|K9JA46_HUMAN/tr|Q8TBA7|Q8TBA7_HUMAN/tr|Q86U12|Q86U12_HUMAN		4.31	2		0	2	MASCOT		T
	R20180100087_1,10630	K.EGLELPEDEEEKKK.M ! K.EGLELPEDEEEKKK.Q	1672.83	8e-05	2	1	62.02	0	5.04e-05	0|0	sp|Q58FF7|H90B3_HUMAN/sp|P08238|HS90B_HUMAN/tr|A0A024RD80|A0A024RD80_HUMAN/tr|B4DGL0|B4DGL0_HUMAN/tr|A8K3W9|A8K3W9_HUMAN/tr|Q9H6X9|Q9H6X9_HUMAN/tr|B4DMA2|B4DMA2_HUMAN ! sp|P07900|HS90A_HUMAN/sp|Q58FG0|HS905_HUMAN/tr|Q2VPJ6|Q2VPJ6_HUMAN/tr|O75322|O75322_HUMAN/tr|Q96HX7|Q96HX7_HUMAN/tr|K9JA46|K9JA46_HUMAN/tr|Q8TBA7|Q8TBA7_HUMAN/tr|Q86U12|Q86U12_HUMAN		4.31	2		0	2	MASCOT		T
	R20180100087_1,13195	K.EIFLR.E ! R.ELFIR.H	677.398	0.00041	2	1	21.83	0	0.344	0|0	sp|P14625|ENPL_HUMAN/sp|Q14568|HS902_HUMAN/sp|P07900|HS90A_HUMAN/sp|P08238|HS90B_HUMAN/tr|A0A024RD80|A0A024RD80_HUMAN/tr|Q96GW1|Q96GW1_HUMAN/tr|V9HWP2|V9HWP2_HUMAN/tr|Q5CAQ5|Q5CAQ5_HUMAN/tr|A0A1W2PRR1|A0A1W2PRR1_HUMAN/tr|B4DGL0|B4DGL0_HUMAN/tr|Q6PK50|Q6PK50_HUMAN/tr|Q2VPJ6|Q2VPJ6_HUMAN/tr|F8W026|F8W026_HUMAN/tr|Q59FC6|Q59FC6_HUMAN/tr|G3V2J8|G3V2J8_HUMAN/tr|H0YJF5|H0YJF5_HUMAN/tr|K9JA46|K9JA46_HUM…		6.1	0		0	2	MASCOT		T
	R20180100087_1,9461	K.EKYIDQEELNK.T	1408.7	-0.00288	3	1	23.4	0	0.466	0|0	sp|Q58FF8|H90B2_HUMAN/sp|Q14568|HS902_HUMAN/sp|P07900|HS90A_HUMAN/sp|P08238|HS90B_HUMAN/tr|A0A024RD80|A0A024RD80_HUMAN/tr|B4DGL0|B4DGL0_HUMAN/tr|Q6PK50|Q6PK50_HUMAN/tr|Q2VPJ6|Q2VPJ6_HUMAN/tr|O75322|O75322_HUMAN/tr|K9JA46|K9JA46_HUMAN/tr|Q8TBA7|Q8TBA7_HUMAN/tr|Q86U12|Q86U12_HUMAN/tr|B4DMA2|B4DMA2_HUMAN		4.41	1		0	2	MASCOT		T
	R20180100087_1,11327	K.EQVANSAFVER.V	1249.62	0.00056	2	1	60.7	0	7.24e-05	0|0	sp|Q58FF7|H90B3_HUMAN/sp|P08238|HS90B_HUMAN/tr|A0A024RD80|A0A024RD80_HUMAN/tr|B4DGL0|B4DGL0_HUMAN/tr|A8K3W9|A8K3W9_HUMAN/tr|Q9H6X9|Q9H6X9_HUMAN/tr|B4DMA2|B4DMA2_HUMAN		4.53	0		0	2	MASCOT		T
	R20180100087_1,7119	K.FENLCK.L ! K.FENLCK.F ! K.FENLCK.I	810.381	0.00049	2	1	21.32	0	0.277	0|0	sp|Q58FF7|H90B3_HUMAN/sp|P08238|HS90B_HUMAN/tr|A0A024RD80|A0A024RD80_HUMAN/tr|B4DGL0|B4DGL0_HUMAN/tr|A8K3W9|A8K3W9_HUMAN/tr|Q9H6X9|Q9H6X9_HUMAN/tr|B4DMA2|B4DMA2_HUMAN ! sp|Q58FF8|H90B2_HUMAN ! sp|P07900|HS90A_HUMAN/sp|Q58FG0|HS905_HUMAN/tr|Q2VPJ6|Q2VPJ6_HUMAN/tr|O75322|O75322_HUMAN/tr|Q96HX7|Q96HX7_HUMAN/tr|K9JA46|K9JA46_HUMAN/tr|Q8TBA7|Q8TBA7_HUMAN/tr|Q86U12|Q86U12_HUMAN		5.99	0		0	2	MASCOT		T
	R20180100087_1,13374	K.FYEAFSK.N	891.425	0.00048	2	1	27.59	0	0.107	0|0	sp|P08238|HS90B_HUMAN/tr|A0A024RD80|A0A024RD80_HUMAN/tr|B4DGL0|B4DGL0_HUMAN/tr|Q58FF4|Q58FF4_HUMAN/tr|A8K3W9|A8K3W9_HUMAN/tr|Q9H6X9|Q9H6X9_HUMAN/tr|B4DMA2|B4DMA2_HUMAN		6	0		0	2	MASCOT		T
	R20180100087_1,1924	K.GEKEEEDKDDEEKPK.I	1804.81	0.00048	4	1	35.6	0	0.00877	0|0	sp|Q58FF7|H90B3_HUMAN/sp|P08238|HS90B_HUMAN/tr|A0A024RD80|A0A024RD80_HUMAN/tr|B4DGL0|B4DGL0_HUMAN/tr|Q6PK50|Q6PK50_HUMAN/tr|B4DMA2|B4DMA2_HUMAN		4.25	2		0	2	MASCOT		T
	R20180100087_1,19709	K.HFSVEGQLEFR.A	1348.66	0.00096	2	1	41.02	0	0.0225	0|0	sp|Q58FF7|H90B3_HUMAN/sp|Q14568|HS902_HUMAN/sp|P07900|HS90A_HUMAN/sp|Q58FG1|HS904_HUMAN/sp|P08238|HS90B_HUMAN/tr|A0A024RD80|A0A024RD80_HUMAN/tr|B4DGL0|B4DGL0_HUMAN/tr|Q6PK50|Q6PK50_HUMAN/tr|Q2VPJ6|Q2VPJ6_HUMAN/tr|O75322|O75322_HUMAN/tr|Q96HX7|Q96HX7_HUMAN/tr|K9JA46|K9JA46_HUMAN/tr|Q8TBA7|Q8TBA7_HUMAN/tr|Q86U12|Q86U12_HUMAN/tr|B4DMA2|B4DMA2_HUMAN		5.4	0		0	2	MASCOT		T
	R20180100087_1,19788	K.HFSVEGQLEFR.A	1348.66	-0.00019	3	1	35.69	0	0.0768	0|0	sp|Q58FF7|H90B3_HUMAN/sp|Q14568|HS902_HUMAN/sp|P07900|HS90A_HUMAN/sp|Q58FG1|HS904_HUMAN/sp|P08238|HS90B_HUMAN/tr|A0A024RD80|A0A024RD80_HUMAN/tr|B4DGL0|B4DGL0_HUMAN/tr|Q6PK50|Q6PK50_HUMAN/tr|Q2VPJ6|Q2VPJ6_HUMAN/tr|O75322|O75322_HUMAN/tr|Q96HX7|Q96HX7_HUMAN/tr|K9JA46|K9JA46_HUMAN/tr|Q8TBA7|Q8TBA7_HUMAN/tr|Q86U12|Q86U12_HUMAN/tr|B4DMA2|B4DMA2_HUMAN		5.4	0		0	2	MASCOT		T
	R20180100087_1,20505	K.HFSVEGQLEFR.A	1348.66	-0.00166	3	1	28.27	0	0.425	0|0	sp|Q58FF7|H90B3_HUMAN/sp|Q14568|HS902_HUMAN/sp|P07900|HS90A_HUMAN/sp|Q58FG1|HS904_HUMAN/sp|P08238|HS90B_HUMAN/tr|A0A024RD80|A0A024RD80_HUMAN/tr|B4DGL0|B4DGL0_HUMAN/tr|Q6PK50|Q6PK50_HUMAN/tr|Q2VPJ6|Q2VPJ6_HUMAN/tr|O75322|O75322_HUMAN/tr|Q96HX7|Q96HX7_HUMAN/tr|K9JA46|K9JA46_HUMAN/tr|Q8TBA7|Q8TBA7_HUMAN/tr|Q86U12|Q86U12_HUMAN/tr|B4DMA2|B4DMA2_HUMAN		5.4	0		0	2	MASCOT		T
	R20180100087_1,23286	K.HFSVEGQLEFR.A	1348.66	0.00158	3	1	20.19	0	3.78	0|0	sp|Q58FF7|H90B3_HUMAN/sp|Q14568|HS902_HUMAN/sp|P07900|HS90A_HUMAN/sp|Q58FG1|HS904_HUMAN/sp|P08238|HS90B_HUMAN/tr|A0A024RD80|A0A024RD80_HUMAN/tr|B4DGL0|B4DGL0_HUMAN/tr|Q6PK50|Q6PK50_HUMAN/tr|Q2VPJ6|Q2VPJ6_HUMAN/tr|O75322|O75322_HUMAN/tr|Q96HX7|Q96HX7_HUMAN/tr|K9JA46|K9JA46_HUMAN/tr|Q8TBA7|Q8TBA7_HUMAN/tr|Q86U12|Q86U12_HUMAN/tr|B4DMA2|B4DMA2_HUMAN		5.4	0		0	2	MASCOT		T
	R20180100087_1,24750	K.HFSVEGQLEFR.A	1348.66	-0.00022	3	1	20.84	0	3.26	0|0	sp|Q58FF7|H90B3_HUMAN/sp|Q14568|HS902_HUMAN/sp|P07900|HS90A_HUMAN/sp|Q58FG1|HS904_HUMAN/sp|P08238|HS90B_HUMAN/tr|A0A024RD80|A0A024RD80_HUMAN/tr|B4DGL0|B4DGL0_HUMAN/tr|Q6PK50|Q6PK50_HUMAN/tr|Q2VPJ6|Q2VPJ6_HUMAN/tr|O75322|O75322_HUMAN/tr|Q96HX7|Q96HX7_HUMAN/tr|K9JA46|K9JA46_HUMAN/tr|Q8TBA7|Q8TBA7_HUMAN/tr|Q86U12|Q86U12_HUMAN/tr|B4DMA2|B4DMA2_HUMAN		5.4	0		0	2	MASCOT		T
	R20180100087_1,32502	K.HFSVEGQLEFR.A	1348.66	-0.00052	3	1	34.07	0	0.155	0|0	sp|Q58FF7|H90B3_HUMAN/sp|Q14568|HS902_HUMAN/sp|P07900|HS90A_HUMAN/sp|Q58FG1|HS904_HUMAN/sp|P08238|HS90B_HUMAN/tr|A0A024RD80|A0A024RD80_HUMAN/tr|B4DGL0|B4DGL0_HUMAN/tr|Q6PK50|Q6PK50_HUMAN/tr|Q2VPJ6|Q2VPJ6_HUMAN/tr|O75322|O75322_HUMAN/tr|Q96HX7|Q96HX7_HUMAN/tr|K9JA46|K9JA46_HUMAN/tr|Q8TBA7|Q8TBA7_HUMAN/tr|Q86U12|Q86U12_HUMAN/tr|B4DMA2|B4DMA2_HUMAN		5.4	0		0	2	MASCOT		T
	R20180100087_1,17915	K.HLEINPDHPIVETLR.Q	1782.95	-0.00221	2	1	68.32	0	1.15e-05	0|0	sp|P08238|HS90B_HUMAN/tr|A0A024RD80|A0A024RD80_HUMAN/tr|B4DGL0|B4DGL0_HUMAN/tr|A8K3W9|A8K3W9_HUMAN/tr|Q9H6X9|Q9H6X9_HUMAN/tr|B4DMA2|B4DMA2_HUMAN		5.27	0		0	2	MASCOT		T
	R20180100087_1,17963	K.HLEINPDHPIVETLR.Q	1782.95	-0.00108	3	1	57.75	0	0.00013	0|0	sp|P08238|HS90B_HUMAN/tr|A0A024RD80|A0A024RD80_HUMAN/tr|B4DGL0|B4DGL0_HUMAN/tr|A8K3W9|A8K3W9_HUMAN/tr|Q9H6X9|Q9H6X9_HUMAN/tr|B4DMA2|B4DMA2_HUMAN		5.27	0		0	2	MASCOT		T
	R20180100087_1,20183	K.HNDDEQYAWESSAGGSFTVR.T ! K.HNDDEQYAWESSAGGSFTVR.A	2255.96	-0.0151	2	1	80.25	0	4.62e-07	0|0	sp|Q14568|HS902_HUMAN/sp|P07900|HS90A_HUMAN/tr|Q2VPJ6|Q2VPJ6_HUMAN/tr|K9JA46|K9JA46_HUMAN/tr|Q8TBA7|Q8TBA7_HUMAN ! sp|P08238|HS90B_HUMAN/tr|A0A024RD80|A0A024RD80_HUMAN/tr|B4DGL0|B4DGL0_HUMAN/tr|Q6PK50|Q6PK50_HUMAN		4.31	0		0	2	MASCOT		T
	R20180100087_1,20191	K.HNDDEQYAWESSAGGSFTVR.T ! K.HNDDEQYAWESSAGGSFTVR.A	2255.96	0.00028	3	1	44.38	0	0.00048	0|0	sp|Q14568|HS902_HUMAN/sp|P07900|HS90A_HUMAN/tr|Q2VPJ6|Q2VPJ6_HUMAN/tr|K9JA46|K9JA46_HUMAN/tr|Q8TBA7|Q8TBA7_HUMAN ! sp|P08238|HS90B_HUMAN/tr|A0A024RD80|A0A024RD80_HUMAN/tr|B4DGL0|B4DGL0_HUMAN/tr|Q6PK50|Q6PK50_HUMAN		4.31	0		0	2	MASCOT		T
	R20180100087_1,20815	K.HNDDEQYAWESSAGGSFTVR.T ! K.HNDDEQYAWESSAGGSFTVR.A	2255.96	0.00697	3	1	62.37	0	6.61e-06	0|0	sp|Q14568|HS902_HUMAN/sp|P07900|HS90A_HUMAN/tr|Q2VPJ6|Q2VPJ6_HUMAN/tr|K9JA46|K9JA46_HUMAN/tr|Q8TBA7|Q8TBA7_HUMAN ! sp|P08238|HS90B_HUMAN/tr|A0A024RD80|A0A024RD80_HUMAN/tr|B4DGL0|B4DGL0_HUMAN/tr|Q6PK50|Q6PK50_HUMAN		4.31	0		0	2	MASCOT		T
	R20180100087_1,20816	K.HNDDEQYAWESSAGGSFTVR.T ! K.HNDDEQYAWESSAGGSFTVR.A	2255.96	0.0068	2	1	111.18	0	8.69e-11	0|0	sp|Q14568|HS902_HUMAN/sp|P07900|HS90A_HUMAN/tr|Q2VPJ6|Q2VPJ6_HUMAN/tr|K9JA46|K9JA46_HUMAN/tr|Q8TBA7|Q8TBA7_HUMAN ! sp|P08238|HS90B_HUMAN/tr|A0A024RD80|A0A024RD80_HUMAN/tr|B4DGL0|B4DGL0_HUMAN/tr|Q6PK50|Q6PK50_HUMAN		4.31	0		0	2	MASCOT		T
	R20180100087_1,21462	K.HNDDEQYAWESSAGGSFTVR.T ! K.HNDDEQYAWESSAGGSFTVR.A	2255.96	-0.00071	3	1	24.61	0	0.0457	0|0	sp|Q14568|HS902_HUMAN/sp|P07900|HS90A_HUMAN/tr|Q2VPJ6|Q2VPJ6_HUMAN/tr|K9JA46|K9JA46_HUMAN/tr|Q8TBA7|Q8TBA7_HUMAN ! sp|P08238|HS90B_HUMAN/tr|A0A024RD80|A0A024RD80_HUMAN/tr|B4DGL0|B4DGL0_HUMAN/tr|Q6PK50|Q6PK50_HUMAN		4.31	0		0	2	MASCOT		T
	R20180100087_1,21470	K.HNDDEQYAWESSAGGSFTVR.T ! K.HNDDEQYAWESSAGGSFTVR.A	2255.96	0.00422	2	1	81.7	0	8.21e-08	0|0	sp|Q14568|HS902_HUMAN/sp|P07900|HS90A_HUMAN/tr|Q2VPJ6|Q2VPJ6_HUMAN/tr|K9JA46|K9JA46_HUMAN/tr|Q8TBA7|Q8TBA7_HUMAN ! sp|P08238|HS90B_HUMAN/tr|A0A024RD80|A0A024RD80_HUMAN/tr|B4DGL0|B4DGL0_HUMAN/tr|Q6PK50|Q6PK50_HUMAN		4.31	0		0	2	MASCOT		T
	R20180100087_1,22163	K.HNDDEQYAWESSAGGSFTVR.T ! K.HNDDEQYAWESSAGGSFTVR.A	2255.96	0.0011	2	1	41.08	0	0.00323	0|0	sp|Q14568|HS902_HUMAN/sp|P07900|HS90A_HUMAN/tr|Q2VPJ6|Q2VPJ6_HUMAN/tr|K9JA46|K9JA46_HUMAN/tr|Q8TBA7|Q8TBA7_HUMAN ! sp|P08238|HS90B_HUMAN/tr|A0A024RD80|A0A024RD80_HUMAN/tr|B4DGL0|B4DGL0_HUMAN/tr|Q6PK50|Q6PK50_HUMAN		4.31	0		0	2	MASCOT		T
	R20180100087_1,22769	K.HNDDEQYAWESSAGGSFTVR.T ! K.HNDDEQYAWESSAGGSFTVR.A	2255.96	-0.0029	2	1	49.87	0	0.000439	0|0	sp|Q14568|HS902_HUMAN/sp|P07900|HS90A_HUMAN/tr|Q2VPJ6|Q2VPJ6_HUMAN/tr|K9JA46|K9JA46_HUMAN/tr|Q8TBA7|Q8TBA7_HUMAN ! sp|P08238|HS90B_HUMAN/tr|A0A024RD80|A0A024RD80_HUMAN/tr|B4DGL0|B4DGL0_HUMAN/tr|Q6PK50|Q6PK50_HUMAN		4.31	0		0	2	MASCOT		T
	R20180100087_1,23432	K.HNDDEQYAWESSAGGSFTVR.T ! K.HNDDEQYAWESSAGGSFTVR.A	2255.96	0.0005	2	1	44.99	0	0.00132	0|0	sp|Q14568|HS902_HUMAN/sp|P07900|HS90A_HUMAN/tr|Q2VPJ6|Q2VPJ6_HUMAN/tr|K9JA46|K9JA46_HUMAN/tr|Q8TBA7|Q8TBA7_HUMAN ! sp|P08238|HS90B_HUMAN/tr|A0A024RD80|A0A024RD80_HUMAN/tr|B4DGL0|B4DGL0_HUMAN/tr|Q6PK50|Q6PK50_HUMAN		4.31	0		0	2	MASCOT		T
	R20180100087_1,23953	K.HNDDEQYAWESSAGGSFTVR.T ! K.HNDDEQYAWESSAGGSFTVR.A	2255.96	0.00124	3	1	46.82	0	0.000268	0|0	sp|Q14568|HS902_HUMAN/sp|P07900|HS90A_HUMAN/tr|Q2VPJ6|Q2VPJ6_HUMAN/tr|K9JA46|K9JA46_HUMAN/tr|Q8TBA7|Q8TBA7_HUMAN ! sp|P08238|HS90B_HUMAN/tr|A0A024RD80|A0A024RD80_HUMAN/tr|B4DGL0|B4DGL0_HUMAN/tr|Q6PK50|Q6PK50_HUMAN		4.31	0		0	2	MASCOT		T
	R20180100087_1,24739	K.HNDDEQYAWESSAGGSFTVR.T ! K.HNDDEQYAWESSAGGSFTVR.A	2255.96	0.00178	3	1	36.84	0	0.00264	0|0	sp|Q14568|HS902_HUMAN/sp|P07900|HS90A_HUMAN/tr|Q2VPJ6|Q2VPJ6_HUMAN/tr|K9JA46|K9JA46_HUMAN/tr|Q8TBA7|Q8TBA7_HUMAN ! sp|P08238|HS90B_HUMAN/tr|A0A024RD80|A0A024RD80_HUMAN/tr|B4DGL0|B4DGL0_HUMAN/tr|Q6PK50|Q6PK50_HUMAN		4.31	0		0	2	MASCOT		T
	R20180100087_1,25681	K.HNDDEQYAWESSAGGSFTVR.T ! K.HNDDEQYAWESSAGGSFTVR.A	2255.96	0.0063	2	1	52.1	0	0.000239	0|0	sp|Q14568|HS902_HUMAN/sp|P07900|HS90A_HUMAN/tr|Q2VPJ6|Q2VPJ6_HUMAN/tr|K9JA46|K9JA46_HUMAN/tr|Q8TBA7|Q8TBA7_HUMAN ! sp|P08238|HS90B_HUMAN/tr|A0A024RD80|A0A024RD80_HUMAN/tr|B4DGL0|B4DGL0_HUMAN/tr|Q6PK50|Q6PK50_HUMAN		4.31	0		0	2	MASCOT		T
	R20180100087_1,27432	K.HSQFIGYPITLYLEK.E ! R.HSQFIGYPITLYLEK.E ! K.HSQFLGYPITLYLEK.E	1808.96	-0.00408	2	1	65.11	0	2.3e-05	0|0	sp|Q58FF7|H90B3_HUMAN/sp|P08238|HS90B_HUMAN/tr|A0A024RD80|A0A024RD80_HUMAN/tr|B4DGL0|B4DGL0_HUMAN/tr|Q6PK50|Q6PK50_HUMAN ! tr|B4DMA2|B4DMA2_HUMAN ! sp|Q58FF8|H90B2_HUMAN		6.75	0		0	2	MASCOT		T
	R20180100087_1,27453	K.HSQFIGYPITLYLEK.E ! R.HSQFIGYPITLYLEK.E ! K.HSQFLGYPITLYLEK.E	1808.96	-0.00066	3	1	37.8	0	0.0125	0|0	sp|Q58FF7|H90B3_HUMAN/sp|P08238|HS90B_HUMAN/tr|A0A024RD80|A0A024RD80_HUMAN/tr|B4DGL0|B4DGL0_HUMAN/tr|Q6PK50|Q6PK50_HUMAN ! tr|B4DMA2|B4DMA2_HUMAN ! sp|Q58FF8|H90B2_HUMAN		6.75	0		0	2	MASCOT		T
	R20180100087_1,17407	K.IDIIPNPQER.T	1194.65	-0.00056	2	1	76.37	0	1.51e-06	0|0	sp|Q58FF7|H90B3_HUMAN/sp|P08238|HS90B_HUMAN/tr|A0A024RD80|A0A024RD80_HUMAN/tr|B4DGL0|B4DGL0_HUMAN/tr|Q6PK50|Q6PK50_HUMAN/tr|O14942|O14942_HUMAN/tr|B4DMA2|B4DMA2_HUMAN		4.37	0		0	2	MASCOT		T
	R20180100087_1,5131	K.IEDVGSDEEDDSGKDK.K	1737.73	-0.0048	2	1	112.39	0	1.99e-10	0|0	sp|Q58FF8|H90B2_HUMAN/sp|P08238|HS90B_HUMAN/tr|A0A024RD80|A0A024RD80_HUMAN/tr|B4DGL0|B4DGL0_HUMAN/tr|Q6PK50|Q6PK50_HUMAN/tr|B4DMA2|B4DMA2_HUMAN		3.8	1		0	2	MASCOT		T
	R20180100087_1,22197	K.KCLELFSELAEDKENYK.K	2116.03	0.00249	3	1	22.21	0	0.505	0|0	sp|P08238|HS90B_HUMAN/tr|A0A024RD80|A0A024RD80_HUMAN/tr|B4DGL0|B4DGL0_HUMAN/tr|A8K3W9|A8K3W9_HUMAN/tr|B4DMA2|B4DMA2_HUMAN		4.59	2		0	2	MASCOT		T
	R20180100087_1,15087	K.KHLEINPDHPIVETLR.Q	1911.04	0.00099	4	1	40.15	0	0.00473	0|0	sp|P08238|HS90B_HUMAN/tr|A0A024RD80|A0A024RD80_HUMAN/tr|B4DGL0|B4DGL0_HUMAN/tr|A8K3W9|A8K3W9_HUMAN/tr|Q9H6X9|Q9H6X9_HUMAN/tr|B4DMA2|B4DMA2_HUMAN		6.01	1		0	2	MASCOT		T
	R20180100087_1,15190	K.KHLEINPDHPIVETLR.Q	1911.04	-0.00428	2	1	45.93	0	0.00118	0|0	sp|P08238|HS90B_HUMAN/tr|A0A024RD80|A0A024RD80_HUMAN/tr|B4DGL0|B4DGL0_HUMAN/tr|A8K3W9|A8K3W9_HUMAN/tr|Q9H6X9|Q9H6X9_HUMAN/tr|B4DMA2|B4DMA2_HUMAN		6.01	1		0	2	MASCOT		T
	R20180100087_1,5087	K.LGIHEDSTNR.R	1141.56	-0.00035	2	1	26.11	0	0.184	0|0	sp|P08238|HS90B_HUMAN/tr|A0A024RD80|A0A024RD80_HUMAN/tr|B4DGL0|B4DGL0_HUMAN/tr|A8K3W9|A8K3W9_HUMAN/tr|Q9H6X9|Q9H6X9_HUMAN/tr|B4DMA2|B4DMA2_HUMAN		5.32	0		0	2	MASCOT		T
	R20180100087_1,16952	K.SLTNDWEDHLAVK.H	1527.74	0.00314	3	1	36.95	0	0.011	0|0	sp|P07900|HS90A_HUMAN/sp|P08238|HS90B_HUMAN/tr|A0A024RD80|A0A024RD80_HUMAN/tr|B4DGL0|B4DGL0_HUMAN/tr|Q6PK50|Q6PK50_HUMAN/tr|Q2VPJ6|Q2VPJ6_HUMAN/tr|O75322|O75322_HUMAN/tr|Q96HX7|Q96HX7_HUMAN/tr|K9JA46|K9JA46_HUMAN/tr|Q8TBA7|Q8TBA7_HUMAN/tr|Q86U12|Q86U12_HUMAN/tr|B4DMA2|B4DMA2_HUMAN		4.53	0		0	2	MASCOT		T
	R20180100087_1,16965	K.SLTNDWEDHLAVK.H	1527.74	0.00106	2	1	78.49	0	7.65e-07	0|0	sp|P07900|HS90A_HUMAN/sp|P08238|HS90B_HUMAN/tr|A0A024RD80|A0A024RD80_HUMAN/tr|B4DGL0|B4DGL0_HUMAN/tr|Q6PK50|Q6PK50_HUMAN/tr|Q2VPJ6|Q2VPJ6_HUMAN/tr|O75322|O75322_HUMAN/tr|Q96HX7|Q96HX7_HUMAN/tr|K9JA46|K9JA46_HUMAN/tr|Q8TBA7|Q8TBA7_HUMAN/tr|Q86U12|Q86U12_HUMAN/tr|B4DMA2|B4DMA2_HUMAN		4.53	0		0	2	MASCOT		T
	R20180100087_1,19879	K.SLTNDWEDHLAVK.H	1527.74	0.00119	3	1	44.86	0	0.00178	0|0	sp|P07900|HS90A_HUMAN/sp|P08238|HS90B_HUMAN/tr|A0A024RD80|A0A024RD80_HUMAN/tr|B4DGL0|B4DGL0_HUMAN/tr|Q6PK50|Q6PK50_HUMAN/tr|Q2VPJ6|Q2VPJ6_HUMAN/tr|O75322|O75322_HUMAN/tr|Q96HX7|Q96HX7_HUMAN/tr|K9JA46|K9JA46_HUMAN/tr|Q8TBA7|Q8TBA7_HUMAN/tr|Q86U12|Q86U12_HUMAN/tr|B4DMA2|B4DMA2_HUMAN		4.53	0		0	2	MASCOT		T
	R20180100087_1,19881	K.SLTNDWEDHLAVK.H	1527.74	-0.00076	2	1	78.33	0	8.31e-07	0|0	sp|P07900|HS90A_HUMAN/sp|P08238|HS90B_HUMAN/tr|A0A024RD80|A0A024RD80_HUMAN/tr|B4DGL0|B4DGL0_HUMAN/tr|Q6PK50|Q6PK50_HUMAN/tr|Q2VPJ6|Q2VPJ6_HUMAN/tr|O75322|O75322_HUMAN/tr|Q96HX7|Q96HX7_HUMAN/tr|K9JA46|K9JA46_HUMAN/tr|Q8TBA7|Q8TBA7_HUMAN/tr|Q86U12|Q86U12_HUMAN/tr|B4DMA2|B4DMA2_HUMAN		4.53	0		0	2	MASCOT		T
	R20180100087_1,21395	K.SLTNDWEDHLAVK.H	1527.74	-0.00331	3	1	25.01	0	0.184	0|0	sp|P07900|HS90A_HUMAN/sp|P08238|HS90B_HUMAN/tr|A0A024RD80|A0A024RD80_HUMAN/tr|B4DGL0|B4DGL0_HUMAN/tr|Q6PK50|Q6PK50_HUMAN/tr|Q2VPJ6|Q2VPJ6_HUMAN/tr|O75322|O75322_HUMAN/tr|Q96HX7|Q96HX7_HUMAN/tr|K9JA46|K9JA46_HUMAN/tr|Q8TBA7|Q8TBA7_HUMAN/tr|Q86U12|Q86U12_HUMAN/tr|B4DMA2|B4DMA2_HUMAN		4.53	0		0	2	MASCOT		T
	R20180100087_1,32509	K.SLTNDWEDHLAVK.H	1527.74	-0.00187	3	1	24.46	0	0.207	0|0	sp|P07900|HS90A_HUMAN/sp|P08238|HS90B_HUMAN/tr|A0A024RD80|A0A024RD80_HUMAN/tr|B4DGL0|B4DGL0_HUMAN/tr|Q6PK50|Q6PK50_HUMAN/tr|Q2VPJ6|Q2VPJ6_HUMAN/tr|O75322|O75322_HUMAN/tr|Q96HX7|Q96HX7_HUMAN/tr|K9JA46|K9JA46_HUMAN/tr|Q8TBA7|Q8TBA7_HUMAN/tr|Q86U12|Q86U12_HUMAN/tr|B4DMA2|B4DMA2_HUMAN		4.53	0		0	2	MASCOT		T
	R20180100087_1,8018	K.SLVSVTK.E	733.445	-3e-05	2	1	20.85	0	0.333	0|0	sp|Q58FF7|H90B3_HUMAN/sp|Q58FF8|H90B2_HUMAN/sp|P08238|HS90B_HUMAN/tr|A0A024RD80|A0A024RD80_HUMAN/tr|B4DGL0|B4DGL0_HUMAN/tr|A8K3W9|A8K3W9_HUMAN/tr|Q9H6X9|Q9H6X9_HUMAN/tr|B4DMA2|B4DMA2_HUMAN		8.47	0		0	2	MASCOT		T
	R20180100087_1,6326	K.VVVITK.H	658.45	-0.00053	2	1	29.16	0	0.011	0|0	sp|P08238|HS90B_HUMAN/tr|A0A024RD80|A0A024RD80_HUMAN/tr|B4DGL0|B4DGL0_HUMAN/tr|Q6PK50|Q6PK50_HUMAN/tr|O14942|O14942_HUMAN		8.72	0		0	2	MASCOT		T
	R20180100087_1,9384	K.YIDQEELNK.T	1151.56	-0.00095	2	1	56.26	0	0.000159	0|0	sp|Q58FF8|H90B2_HUMAN/sp|Q14568|HS902_HUMAN/sp|P07900|HS90A_HUMAN/sp|P08238|HS90B_HUMAN/tr|A0A024RD80|A0A024RD80_HUMAN/tr|B4DGL0|B4DGL0_HUMAN/tr|Q6PK50|Q6PK50_HUMAN/tr|Q2VPJ6|Q2VPJ6_HUMAN/tr|O75322|O75322_HUMAN/tr|K9JA46|K9JA46_HUMAN/tr|Q8TBA7|Q8TBA7_HUMAN/tr|Q86U12|Q86U12_HUMAN/tr|B4DMA2|B4DMA2_HUMAN		4.14	0		0	2	MASCOT		T
	R20180100087_1,3328	R.ADHGEPIGR.G	951.464	-6e-05	3	1	37.03	0	0.0127	0|0	sp|P08238|HS90B_HUMAN/tr|A0A024RD80|A0A024RD80_HUMAN/tr|Q6PK50|Q6PK50_HUMAN		5.32	0		0	2	MASCOT		T
	R20180100087_1,23520	R.ALLFIPR.R	829.529	-0.00151	2	1	24.74	0	0.106	0|0	sp|P08238|HS90B_HUMAN/tr|A0A024RD80|A0A024RD80_HUMAN/tr|B4DGL0|B4DGL0_HUMAN/tr|Q6PK50|Q6PK50_HUMAN/tr|B4DMA2|B4DMA2_HUMAN		9.8	0		0	2	MASCOT		T
	R20180100087_1,24034	R.APFDLFENK.K	1080.54	4e-05	2	1	44.81	0	0.00223	0|0	sp|Q58FF7|H90B3_HUMAN/sp|P08238|HS90B_HUMAN/tr|A0A024RD80|A0A024RD80_HUMAN/tr|B4DGL0|B4DGL0_HUMAN/tr|B4DMA2|B4DMA2_HUMAN		4.37	0		0	2	MASCOT		T
	R20180100087_1,19867	R.APFDLFENKK.K	1208.63	0.00189	3	1	31.61	0	0.085	0|0	sp|Q58FF7|H90B3_HUMAN/sp|P08238|HS90B_HUMAN/tr|A0A024RD80|A0A024RD80_HUMAN/tr|B4DGL0|B4DGL0_HUMAN/tr|B4DMA2|B4DMA2_HUMAN		6.11	1		0	2	MASCOT		T
	R20180100087_1,19941	R.APFDLFENKK.K	1208.63	-0.00599	2	1	28.61	0	0.162	0|0	sp|Q58FF7|H90B3_HUMAN/sp|P08238|HS90B_HUMAN/tr|A0A024RD80|A0A024RD80_HUMAN/tr|B4DGL0|B4DGL0_HUMAN/tr|B4DMA2|B4DMA2_HUMAN		6.11	1		0	2	MASCOT		T
	R20180100087_1,10159	R.DNSTM*GYMMAK.K	1264.5	-0.00149	2	1	20.47	0	0.0467	0|0	sp|Q58FF7|H90B3_HUMAN/sp|P08238|HS90B_HUMAN/tr|A0A024RD80|A0A024RD80_HUMAN/tr|B4DGL0|B4DGL0_HUMAN/tr|A8K3W9|A8K3W9_HUMAN/tr|Q9H6X9|Q9H6X9_HUMAN/tr|B4DMA2|B4DMA2_HUMAN		5.84	0	15.994919 Oxidation (M)	0	2	MASCOT		T
	R20180100087_1,11011	R.DNSTMGYMM*AK.K	1264.5	-3e-05	2	1	45.14	0	0.000145	0|0	sp|Q58FF7|H90B3_HUMAN/sp|P08238|HS90B_HUMAN/tr|A0A024RD80|A0A024RD80_HUMAN/tr|B4DGL0|B4DGL0_HUMAN/tr|A8K3W9|A8K3W9_HUMAN/tr|Q9H6X9|Q9H6X9_HUMAN/tr|B4DMA2|B4DMA2_HUMAN		5.84	0	15.994919 Oxidation (M)	0	2	MASCOT		T
	R20180100087_1,14733	R.DNSTMGYMMAK.K	1248.51	0.001	2	1	62.23	0	4.1e-06	0|0	sp|Q58FF7|H90B3_HUMAN/sp|P08238|HS90B_HUMAN/tr|A0A024RD80|A0A024RD80_HUMAN/tr|B4DGL0|B4DGL0_HUMAN/tr|A8K3W9|A8K3W9_HUMAN/tr|Q9H6X9|Q9H6X9_HUMAN/tr|B4DMA2|B4DMA2_HUMAN		5.84	0		0	2	MASCOT		T
	R20180100087_1,15420	R.ELISNASDALDK.I	1275.64	-0.00139	2	1	60.32	0	7.42e-05	0|0	sp|P14625|ENPL_HUMAN/sp|P08238|HS90B_HUMAN/tr|A0A024RD80|A0A024RD80_HUMAN/tr|Q96GW1|Q96GW1_HUMAN/tr|V9HWP2|V9HWP2_HUMAN/tr|Q5CAQ5|Q5CAQ5_HUMAN/tr|A0A1W2PRR1|A0A1W2PRR1_HUMAN/tr|B4DGL0|B4DGL0_HUMAN/tr|Q6PK50|Q6PK50_HUMAN/tr|F8W026|F8W026_HUMAN/tr|Q59FC6|Q59FC6_HUMAN/tr|B4DQX3|B4DQX3_HUMAN/tr|B4DMA2|B4DMA2_HUMAN		4.03	0		0	2	MASCOT		T
	R20180100087_1,2461	R.EM*LQQSK.I	879.424	0.00038	2	1	38.76	0	0.00778	0|0	sp|Q58FF7|H90B3_HUMAN/sp|P07900|HS90A_HUMAN/sp|P08238|HS90B_HUMAN/tr|A0A024RD80|A0A024RD80_HUMAN/tr|B4DGL0|B4DGL0_HUMAN/tr|Q2VPJ6|Q2VPJ6_HUMAN/tr|O75322|O75322_HUMAN/tr|Q96HX7|Q96HX7_HUMAN/tr|K9JA46|K9JA46_HUMAN/tr|Q8TBA7|Q8TBA7_HUMAN/tr|A8K3W9|A8K3W9_HUMAN/tr|Q9H6X9|Q9H6X9_HUMAN/tr|Q86U12|Q86U12_HUMAN/tr|B4DMA2|B4DMA2_HUMAN		6.1	0	15.994919 Oxidation (M)	0	2	MASCOT		T
	R20180100087_1,3936	R.EMLQQSK.I	863.429	-0.0004	2	1	26.55	0	0.15	0|0	sp|Q58FF7|H90B3_HUMAN/sp|P07900|HS90A_HUMAN/sp|P08238|HS90B_HUMAN/tr|A0A024RD80|A0A024RD80_HUMAN/tr|B4DGL0|B4DGL0_HUMAN/tr|Q2VPJ6|Q2VPJ6_HUMAN/tr|O75322|O75322_HUMAN/tr|Q96HX7|Q96HX7_HUMAN/tr|K9JA46|K9JA46_HUMAN/tr|Q8TBA7|Q8TBA7_HUMAN/tr|A8K3W9|A8K3W9_HUMAN/tr|Q9H6X9|Q9H6X9_HUMAN/tr|Q86U12|Q86U12_HUMAN/tr|B4DMA2|B4DMA2_HUMAN		6.1	0		0	2	MASCOT		T
	R20180100087_1,26506	R.GFEVVYM*TEPIDEYCVQQLK.E	2464.14	-0.00358	2	1	56.38	0	0.000103	0|0	sp|P08238|HS90B_HUMAN/tr|A0A024RD80|A0A024RD80_HUMAN/tr|B4DGL0|B4DGL0_HUMAN/tr|A8K3W9|A8K3W9_HUMAN/tr|Q9H6X9|Q9H6X9_HUMAN/tr|B4DMA2|B4DMA2_HUMAN		4	0	15.994919 Oxidation (M)	0	2	MASCOT		T
	R20180100087_1,22015	R.GVVDSEDIPLNLSR.E ! R.GVVDSEDLPLNISR.E	1513.79	0.00345	2	1	57.95	0	0.000135	0|0	sp|Q12931|TRAP1_HUMAN/tr|Q8N9Z3|Q8N9Z3_HUMAN/tr|Q9BV61|Q9BV61_HUMAN/tr|I3L0K7|I3L0K7_HUMAN/tr|Q53G55|Q53G55_HUMAN/tr|A0A140VJY2|A0A140VJY2_HUMAN/tr|I3L239|I3L239_HUMAN/tr|Q53FS6|Q53FS6_HUMAN ! sp|P07900|HS90A_HUMAN/sp|P08238|HS90B_HUMAN/tr|A0A024RD80|A0A024RD80_HUMAN/tr|B4DGL0|B4DGL0_HUMAN/tr|Q2VPJ6|Q2VPJ6_HUMAN/tr|O75322|O75322_HUMAN/tr|Q96HX7|Q96HX7_HUMAN/tr|K9JA46|K9JA46_HUMAN/tr|Q8TBA7|Q8TBA7…		4.03	0		0	2	MASCOT		T
	R20180100087_1,22672	R.GVVDSEDIPLNLSR.E ! R.GVVDSEDLPLNISR.E	1513.79	-0.00247	2	1	61.43	0	0.000151	0|0	sp|Q12931|TRAP1_HUMAN/tr|Q8N9Z3|Q8N9Z3_HUMAN/tr|Q9BV61|Q9BV61_HUMAN/tr|I3L0K7|I3L0K7_HUMAN/tr|Q53G55|Q53G55_HUMAN/tr|A0A140VJY2|A0A140VJY2_HUMAN/tr|I3L239|I3L239_HUMAN/tr|Q53FS6|Q53FS6_HUMAN ! sp|P07900|HS90A_HUMAN/sp|P08238|HS90B_HUMAN/tr|A0A024RD80|A0A024RD80_HUMAN/tr|B4DGL0|B4DGL0_HUMAN/tr|Q2VPJ6|Q2VPJ6_HUMAN/tr|O75322|O75322_HUMAN/tr|Q96HX7|Q96HX7_HUMAN/tr|K9JA46|K9JA46_HUMAN/tr|Q8TBA7|Q8TBA7…		4.03	0		0	2	MASCOT		T
	R20180100087_1,27183	R.LVSSPCCIVTSTYGWTANMER.I	2432.1	-0.00127	3	1	50.32	0	0.00033	0|0	sp|P08238|HS90B_HUMAN/tr|A0A024RD80|A0A024RD80_HUMAN/tr|B4DGL0|B4DGL0_HUMAN/tr|A8K3W9|A8K3W9_HUMAN/tr|Q9H6X9|Q9H6X9_HUMAN/tr|B4DMA2|B4DMA2_HUMAN		5.99	0		0	2	MASCOT		T
	R20180100087_1,19491	R.NPDDITQEEYGEFYK.S	1847.8	-0.01313	2	1	45.35	0	0.00185	0|0	sp|P08238|HS90B_HUMAN/tr|A0A024RD80|A0A024RD80_HUMAN/tr|B4DGL0|B4DGL0_HUMAN/tr|Q6PK50|Q6PK50_HUMAN/tr|B4DMA2|B4DMA2_HUMAN		3.83	0		0	2	MASCOT		T
	R20180100087_1,20110	R.NPDDITQEEYGEFYK.S	1847.8	0.00279	2	1	84.81	0	5.88e-08	0|0	sp|P08238|HS90B_HUMAN/tr|A0A024RD80|A0A024RD80_HUMAN/tr|B4DGL0|B4DGL0_HUMAN/tr|Q6PK50|Q6PK50_HUMAN/tr|B4DMA2|B4DMA2_HUMAN		3.83	0		0	2	MASCOT		T
	R20180100087_1,21666	R.RAPFDLFENK.K	1236.64	0.00202	3	1	42.93	0	0.00503	0|0	sp|Q58FF7|H90B3_HUMAN/sp|P08238|HS90B_HUMAN/tr|A0A024RD80|A0A024RD80_HUMAN/tr|B4DGL0|B4DGL0_HUMAN/tr|B4DMA2|B4DMA2_HUMAN		6.07	1		0	2	MASCOT		T
	R20180100087_1,18602	R.TLTIVDTGIGM*TK.A ! R.TLTLVDTGIGM*TK.A	1365.73	-0.00211	2	1	51.82	0	0.00103	0|0	sp|P07900|HS90A_HUMAN/sp|Q58FG1|HS904_HUMAN/tr|Q2VPJ6|Q2VPJ6_HUMAN/tr|G3V2J8|G3V2J8_HUMAN/tr|K9JA46|K9JA46_HUMAN/tr|B4DTA5|B4DTA5_HUMAN/tr|Q86SX1|Q86SX1_HUMAN ! sp|P08238|HS90B_HUMAN/tr|A0A024RD80|A0A024RD80_HUMAN/tr|B4DGL0|B4DGL0_HUMAN/tr|Q6PK50|Q6PK50_HUMAN/tr|O14942|O14942_HUMAN/tr|B4DMA2|B4DMA2_HUMAN		5.5	0	15.994919 Oxidation (M)	0	2	MASCOT		T
	R20180100087_1,19308	R.TLTIVDTGIGM*TK.A ! R.TLTLVDTGIGM*TK.A	1365.73	-0.00083	2	1	64.99	0	2.28e-05	0|0	sp|P07900|HS90A_HUMAN/sp|Q58FG1|HS904_HUMAN/tr|Q2VPJ6|Q2VPJ6_HUMAN/tr|G3V2J8|G3V2J8_HUMAN/tr|K9JA46|K9JA46_HUMAN/tr|B4DTA5|B4DTA5_HUMAN/tr|Q86SX1|Q86SX1_HUMAN ! sp|P08238|HS90B_HUMAN/tr|A0A024RD80|A0A024RD80_HUMAN/tr|B4DGL0|B4DGL0_HUMAN/tr|Q6PK50|Q6PK50_HUMAN/tr|O14942|O14942_HUMAN/tr|B4DMA2|B4DMA2_HUMAN		5.5	0	15.994919 Oxidation (M)	0	2	MASCOT		T
	R20180100087_1,22077	R.TLTIVDTGIGMTK.A ! R.TLTLVDTGIGMTK.A	1349.73	0.00145	2	1	78.69	0	1.93e-06	0|0	sp|P07900|HS90A_HUMAN/sp|Q58FG1|HS904_HUMAN/tr|Q2VPJ6|Q2VPJ6_HUMAN/tr|G3V2J8|G3V2J8_HUMAN/tr|K9JA46|K9JA46_HUMAN/tr|B4DTA5|B4DTA5_HUMAN/tr|Q86SX1|Q86SX1_HUMAN ! sp|P08238|HS90B_HUMAN/tr|A0A024RD80|A0A024RD80_HUMAN/tr|B4DGL0|B4DGL0_HUMAN/tr|Q6PK50|Q6PK50_HUMAN/tr|O14942|O14942_HUMAN/tr|B4DMA2|B4DMA2_HUMAN		5.5	0		0	2	MASCOT		T
	R20180100087_1,22724	R.TLTIVDTGIGMTK.A ! R.TLTLVDTGIGMTK.A	1349.73	-5e-05	2	1	78.2	0	2.19e-06	0|0	sp|P07900|HS90A_HUMAN/sp|Q58FG1|HS904_HUMAN/tr|Q2VPJ6|Q2VPJ6_HUMAN/tr|G3V2J8|G3V2J8_HUMAN/tr|K9JA46|K9JA46_HUMAN/tr|B4DTA5|B4DTA5_HUMAN/tr|Q86SX1|Q86SX1_HUMAN ! sp|P08238|HS90B_HUMAN/tr|A0A024RD80|A0A024RD80_HUMAN/tr|B4DGL0|B4DGL0_HUMAN/tr|Q6PK50|Q6PK50_HUMAN/tr|O14942|O14942_HUMAN/tr|B4DMA2|B4DMA2_HUMAN		5.5	0		0	2	MASCOT		T
	R20180100087_1,22853	R.TLTIVDTGIGMTK.A ! R.TLTLVDTGIGMTK.A	1349.73	-0.00111	2	1	73.79	0	6.05e-06	0|0	sp|P07900|HS90A_HUMAN/sp|Q58FG1|HS904_HUMAN/tr|Q2VPJ6|Q2VPJ6_HUMAN/tr|G3V2J8|G3V2J8_HUMAN/tr|K9JA46|K9JA46_HUMAN/tr|B4DTA5|B4DTA5_HUMAN/tr|Q86SX1|Q86SX1_HUMAN ! sp|P08238|HS90B_HUMAN/tr|A0A024RD80|A0A024RD80_HUMAN/tr|B4DGL0|B4DGL0_HUMAN/tr|Q6PK50|Q6PK50_HUMAN/tr|O14942|O14942_HUMAN/tr|B4DMA2|B4DMA2_HUMAN		5.5	0		0	2	MASCOT		T
	R20180100087_1,30057	R.VFIM*DSCDELIPEYLNFIR.G	2390.14	-0.00116	2	1	138.13	0	9.74e-13	0|0	sp|P08238|HS90B_HUMAN/tr|A0A024RD80|A0A024RD80_HUMAN/tr|B4DGL0|B4DGL0_HUMAN/tr|B4DMA2|B4DMA2_HUMAN		3.92	0	15.994919 Oxidation (M)	0	2	MASCOT		T
	R20180100087_1,30666	R.VFIMDSCDELIPEYLNFIR.G	2374.15	-0.00173	3	1	27.49	0	0.123	0|0	sp|P08238|HS90B_HUMAN/tr|A0A024RD80|A0A024RD80_HUMAN/tr|B4DGL0|B4DGL0_HUMAN/tr|B4DMA2|B4DMA2_HUMAN		3.92	0		0	2	MASCOT		T
	R20180100087_1,8073	R.YESLTDPSK.L	1039.49	-9e-05	2	1	47.98	0	0.00118	0|0	sp|Q58FF7|H90B3_HUMAN/sp|Q58FF8|H90B2_HUMAN/sp|P07900|HS90A_HUMAN/sp|Q58FF6|H90B4_HUMAN/sp|P08238|HS90B_HUMAN/tr|A0A024RD80|A0A024RD80_HUMAN/tr|Q6PK50|Q6PK50_HUMAN/tr|Q2VPJ6|Q2VPJ6_HUMAN/tr|G3V2J8|G3V2J8_HUMAN/tr|K9JA46|K9JA46_HUMAN/tr|O14942|O14942_HUMAN/tr|B4DTA5|B4DTA5_HUMAN/tr|Q86SX1|Q86SX1_HUMAN/tr|B4DMA2|B4DMA2_HUMAN		4.37	0		0	2	MASCOT		T
	R20180100087_1,12457	R.YESLTDPSKLDSGK.E	1539.75	0.00013	3	1	36.81	0	0.0151	0|0	sp|Q58FF7|H90B3_HUMAN/sp|Q58FF8|H90B2_HUMAN/sp|P07900|HS90A_HUMAN/sp|P08238|HS90B_HUMAN/tr|A0A024RD80|A0A024RD80_HUMAN/tr|Q6PK50|Q6PK50_HUMAN/tr|Q2VPJ6|Q2VPJ6_HUMAN/tr|G3V2J8|G3V2J8_HUMAN/tr|K9JA46|K9JA46_HUMAN/tr|O14942|O14942_HUMAN/tr|B4DTA5|B4DTA5_HUMAN/tr|Q86SX1|Q86SX1_HUMAN/tr|B4DMA2|B4DMA2_HUMAN		4.56	1		0	2	MASCOT		T
	R20180100087_1,19380	R.YHTSQSGDEMTSLSEYVSR.M	2176.95	0.0005	3	1	86.67	0	5.33e-08	0|0	sp|P08238|HS90B_HUMAN/tr|A0A024RD80|A0A024RD80_HUMAN/tr|B4DGL0|B4DGL0_HUMAN/tr|A8K3W9|A8K3W9_HUMAN/tr|Q9H6X9|Q9H6X9_HUMAN/tr|B4DMA2|B4DMA2_HUMAN		4.65	0		0	2	MASCOT		T
	R20180100087_1,20001	R.YHTSQSGDEMTSLSEYVSR.M	2176.95	0.00089	3	1	31.52	0	0.0174	0|0	sp|P08238|HS90B_HUMAN/tr|A0A024RD80|A0A024RD80_HUMAN/tr|B4DGL0|B4DGL0_HUMAN/tr|A8K3W9|A8K3W9_HUMAN/tr|Q9H6X9|Q9H6X9_HUMAN/tr|B4DMA2|B4DMA2_HUMAN		4.65	0		0	2	MASCOT		T
$6-1	sp|Q02952|AKA12_HUMAN A-kinase anchor protein 12 OS=Homo sapiens GN=AKAP12 PE=1 SV=4	41	36	0.3042	191480	4.37
	R20180100087_1,15111	K.DKTEKPDTVQLLTVK.K ! R.DKTEKPDTVQLLTVK.K	1714.96	-0.00719	3	1	27.04	0	0.0859	0|0	sp|Q02952|AKA12_HUMAN/tr|Q5CZB5|Q5CZB5_HUMAN/tr|Q86TJ9|Q86TJ9_HUMAN ! tr|Q6NSG9|Q6NSG9_HUMAN		6.12	1		0	2	MASCOT		T
	R20180100087_1,14232	K.EDEKGDDVDDPENQNSALADTDASGGLTK.E	3006.29	-0.00362	3	1	76.32	0	8.4e-07	0|0	sp|Q02952|AKA12_HUMAN		3.66	1		0	2	MASCOT		T
	R20180100087_1,3433	K.EDEVEASEK.K	1035.45	-0.00078	2	1	41.71	0	0.00101	0|0	sp|Q02952|AKA12_HUMAN/tr|Q86TJ9|Q86TJ9_HUMAN		3.91	0		0	2	MASCOT		T
	R20180100087_1,8334	K.EESESTAVGQAHSDISK.D	1774.81	-0.00191	2	1	79.67	0	3.78e-07	0|0	sp|Q02952|AKA12_HUMAN		4.4	0		0	2	MASCOT		T
	R20180100087_1,8353	K.EESESTAVGQAHSDISK.D	1774.81	-0.00086	3	1	37.2	0	0.00651	0|0	sp|Q02952|AKA12_HUMAN		4.4	0		0	2	MASCOT		T
	R20180100087_1,20517	K.EESQLPGTGGPEDVLQPVQR.A	2136.06	0.00764	2	1	25.04	0	0.582	0|0	sp|Q02952|AKA12_HUMAN/tr|Q5CZB5|Q5CZB5_HUMAN		4	0		0	2	MASCOT		T
	R20180100087_1,7740	K.EKEDAQEVELQEGK.V	1631.78	-0.00612	3	1	23.21	0	0.327	0|0	sp|Q02952|AKA12_HUMAN		4.14	1		0	2	MASCOT		T
	R20180100087_1,18187	K.ERPPAPSSFVFQEETK.E	1848.91	0.01492	2	1	51.49	0	0.000503	0|0	sp|Q02952|AKA12_HUMAN/tr|Q5CZB5|Q5CZB5_HUMAN		4.79	0		0	2	MASCOT		T
	R20180100087_1,18245	K.ERPPAPSSFVFQEETK.E	1848.91	-0.00222	3	1	56.2	0	0.000178	0|0	sp|Q02952|AKA12_HUMAN/tr|Q5CZB5|Q5CZB5_HUMAN		4.79	0		0	2	MASCOT		T
	R20180100087_1,12291	K.ETCVSGEDPTQGADLSPDEK.V	2134.91	0.00171	2	1	70.29	0	2.65e-06	0|0	sp|Q02952|AKA12_HUMAN/tr|Q5CZB5|Q5CZB5_HUMAN		3.71	0		0	2	MASCOT		T
	R20180100087_1,25330	K.GALNGQGALNSQEEEEVIVTEVGQR.D	2627.29	-0.01474	3	1	20.11	0	2.74	0|0	sp|Q02952|AKA12_HUMAN/tr|Q86TJ9|Q86TJ9_HUMAN		3.98	0		0	2	MASCOT		T
	R20180100087_1,17133	K.GESSASSPEEPEEITCLEK.G	2078.91	0.00347	2	1	61.79	0	1.39e-05	0|0	sp|Q02952|AKA12_HUMAN/tr|Q5CZB5|Q5CZB5_HUMAN		3.9	0		0	2	MASCOT		T
	R20180100087_1,11888	K.GLAEVQQDGEAEEGATSDGEK.K	2119.93	0.01185	2	1	54.16	0	0.000222	0|0	sp|Q02952|AKA12_HUMAN/tr|Q5CZB5|Q5CZB5_HUMAN		3.71	0		0	2	MASCOT		T
	R20180100087_1,5790	K.GSVEEPKPEEPK.R	1325.66	0.00278	2	1	73.52	0	9.72e-06	0|0	sp|Q02952|AKA12_HUMAN/tr|Q5CZB5|Q5CZB5_HUMAN		4.49	0		0	2	MASCOT		T
	R20180100087_1,7454	K.KGLSSDLEGEK.T	1162.59	-0.00094	2	1	53.2	0	0.000438	0|0	sp|Q02952|AKA12_HUMAN		4.68	1		0	2	MASCOT		T
	R20180100087_1,12468	K.LKETCVSGEDPTQGADLSPDEK.V	2376.09	-0.00012	3	1	32.95	0	0.0313	0|0	sp|Q02952|AKA12_HUMAN/tr|Q5CZB5|Q5CZB5_HUMAN		4.02	1		0	2	MASCOT		T
	R20180100087_1,6712	K.LTASEQAHPQEPAESAHEPR.L	2185.03	-0.00514	3	1	47.26	0	0.00104	0|0	sp|Q02952|AKA12_HUMAN/tr|Q5CZB5|Q5CZB5_HUMAN		4.87	0		0	2	MASCOT		T
	R20180100087_1,30500	K.LVQNIIQTAVDQFVR.T	1743.98	-0.00154	2	1	76.59	0	1.19e-06	0|0	sp|Q02952|AKA12_HUMAN		5.84	0		0	2	MASCOT		T
	R20180100087_1,30513	K.LVQNIIQTAVDQFVR.T	1743.98	-0.00545	3	1	58.03	0	7.73e-05	0|0	sp|Q02952|AKA12_HUMAN		5.84	0		0	2	MASCOT		T
	R20180100087_1,5320	K.MEDTLEHTDK.E	1218.53	-0.00104	2	1	37.62	0	0.00209	0|0	sp|Q02952|AKA12_HUMAN/tr|Q5CZB5|Q5CZB5_HUMAN		4.31	0		0	2	MASCOT		T
	R20180100087_1,13183	K.NEDFAAHPGEDAVPTGPDCQAK.S	2326	0.00452	3	1	41.99	0	0.000971	0|0	sp|Q02952|AKA12_HUMAN		4.1	0		0	2	MASCOT		T
	R20180100087_1,25338	K.QLLQTVNVPIIDGAK.E	1608.93	0.00032	2	1	30.32	0	0.0208	0|0	sp|Q02952|AKA12_HUMAN		5.84	0		0	2	MASCOT		T
	R20180100087_1,26487	K.QLLQTVNVPIIDGAK.E	1608.93	-0.00366	2	1	51.71	0	0.000124	0|0	sp|Q02952|AKA12_HUMAN		5.84	0		0	2	MASCOT		T
	R20180100087_1,4515	K.QSTEKPEETLK.R	1289.66	0.0002	2	1	25.24	0	0.294	0|0	sp|Q02952|AKA12_HUMAN/tr|Q5CZB5|Q5CZB5_HUMAN/tr|Q6NSG9|Q6NSG9_HUMAN/tr|Q86TJ9|Q86TJ9_HUMAN		4.79	0		0	2	MASCOT		T
	R20180100087_1,4061	K.QSTEKPEETLKR.E	1445.76	-0.00024	3	1	20.19	0	0.839	0|0	sp|Q02952|AKA12_HUMAN/tr|Q5CZB5|Q5CZB5_HUMAN/tr|Q6NSG9|Q6NSG9_HUMAN/tr|Q86TJ9|Q86TJ9_HUMAN		6.23	1		0	2	MASCOT		T
	R20180100087_1,13488	K.SAESPTSPVTSETGSTFK.K	1812.85	-0.00113	2	1	73.37	0	2.55e-06	0|0	sp|Q02952|AKA12_HUMAN/tr|Q86TJ9|Q86TJ9_HUMAN		4.53	0		0	2	MASCOT		T
	R20180100087_1,11067	K.SDEVDEQVACQEVK.V	1635.72	0.00175	2	1	69.81	0	1.92e-06	0|0	sp|Q02952|AKA12_HUMAN		3.83	0		0	2	MASCOT		T
	R20180100087_1,17983	K.SEDSIAGSGVEHSTPDTEPGKEESWVSIK.K	3058.41	0.0021	3	1	36.6	0	0.00939	0|0	sp|Q02952|AKA12_HUMAN/tr|Q5CZB5|Q5CZB5_HUMAN		4.25	1		0	2	MASCOT		T
	R20180100087_1,10440	K.STPVIVSATTK.K	1103.63	-0.00053	2	1	46.01	0	0.00176	0|0	sp|Q02952|AKA12_HUMAN		8.47	0		0	2	MASCOT		T
	R20180100087_1,3613	K.TEAEPTHVNEEK.L	1383.64	-0.00041	2	1	64.37	0	1.55e-05	0|0	sp|Q02952|AKA12_HUMAN		4.48	0		0	2	MASCOT		T
	R20180100087_1,7613	K.TEGTQEADQYADEK.T	1584.67	-0.00036	2	1	67.76	0	2.07e-06	0|0	sp|Q02952|AKA12_HUMAN		3.83	0		0	2	MASCOT		T
	R20180100087_1,16223	K.TEKPDTVQLLTVK.K	1471.84	-0.00209	2	1	32.38	0	0.0677	0|0	sp|Q02952|AKA12_HUMAN/tr|Q5CZB5|Q5CZB5_HUMAN/tr|Q6NSG9|Q6NSG9_HUMAN/tr|Q86TJ9|Q86TJ9_HUMAN		5.73	0		0	2	MASCOT		T
	R20180100087_1,23523	K.VELPSEEQVSGSQGPSEEKPAPLATEVFDEK.I	3313.6	0.00013	3	1	47.17	0	0.001	0|0	sp|Q02952|AKA12_HUMAN/tr|Q5CZB5|Q5CZB5_HUMAN		3.99	0		0	2	MASCOT		T
	R20180100087_1,27438	K.VLGETANILETGETLEPAGAHLVLEEK.S	2833.48	-0.00372	3	1	69.32	0	5.94e-06	0|0	sp|Q02952|AKA12_HUMAN		4.2	0		0	2	MASCOT		T
	R20180100087_1,4791	K.VQGSPLK.K	728.43	0.00117	2	1	21.59	0	0.393	0|0	sp|Q02952|AKA12_HUMAN/tr|Q5CZB5|Q5CZB5_HUMAN		8.72	0		0	2	MASCOT		T
	R20180100087_1,7645	K.VTEVALK.G	759.461	0.00029	2	1	35.33	0	0.0335	0|0	sp|Q02952|AKA12_HUMAN		5.97	0		0	2	MASCOT		T
	R20180100087_1,7979	R.AEAERPEEQAEASGLK.K	1714.82	-0.00015	2	1	81.89	0	4.11e-07	0|0	sp|Q02952|AKA12_HUMAN/tr|Q5CZB5|Q5CZB5_HUMAN		4.33	0		0	2	MASCOT		T
	R20180100087_1,8001	R.AEAERPEEQAEASGLK.K	1714.82	-0.00278	3	1	40.98	0	0.0114	0|0	sp|Q02952|AKA12_HUMAN/tr|Q5CZB5|Q5CZB5_HUMAN		4.33	0		0	2	MASCOT		T
	R20180100087_1,3224	R.EKTEAEPTHVNEEK.L	1640.78	0.00101	4	1	28.74	0	0.0884	0|0	sp|Q02952|AKA12_HUMAN		4.64	1		0	2	MASCOT		T
	R20180100087_1,18830	R.EVIAEEEPPTVTEPLPENR.E	2149.07	0.00116	2	1	98.02	0	1.19e-08	0|0	sp|Q02952|AKA12_HUMAN/tr|Q5CZB5|Q5CZB5_HUMAN		3.9	0		0	2	MASCOT		T
	R20180100087_1,13180	R.TQEVLQAVAEK.V	1215.66	-0.0006	2	1	54.11	0	0.000371	0|0	sp|Q02952|AKA12_HUMAN/tr|Q5CZB5|Q5CZB5_HUMAN		4.53	0		0	2	MASCOT		T
$7-1	tr|A0A024R3X4|A0A024R3X4_HUMAN Heat shock 60kDa protein 1 (Chaperonin), isoform CRA_a OS=Homo sapiens GN=HSPD1 PE=2 SV=1	73	33	0.7155	61053.9	5.7
$7-2	sp|P10809|CH60_HUMAN 60 kDa heat shock protein, mitochondrial OS=Homo sapiens GN=HSPD1 PE=1 SV=2	73	33	0.7155	61053.9	5.7
	R20180100087_1,5524	K.APGFGDNR.K	833.39	-0.00064	2	1	44.19	0	0.00167	0|0	sp|P10809|CH60_HUMAN/tr|A0A024R3X4|A0A024R3X4_HUMAN/tr|B7Z4F6|B7Z4F6_HUMAN/tr|B7Z532|B7Z532_HUMAN/tr|B3GQS7|B3GQS7_HUMAN/tr|B7Z5E7|B7Z5E7_HUMAN/tr|B7Z597|B7Z597_HUMAN		5.88	0		0	2	MASCOT		T
	R20180100087_1,26383	K.CEFQDAYVLLSEK.K	1601.75	-0.00133	3	1	56.36	0	0.000115	0|0	sp|P10809|CH60_HUMAN/tr|A0A024R3X4|A0A024R3X4_HUMAN/tr|B9VPB4|B9VPB4_HUMAN/tr|B7Z4F6|B7Z4F6_HUMAN/tr|B9VP19|B9VP19_HUMAN/tr|B3GQS7|B3GQS7_HUMAN/tr|B7Z5E7|B7Z5E7_HUMAN/tr|B7Z597|B7Z597_HUMAN/tr|Q53QD5|Q53QD5_HUMAN		4.14	0		0	2	MASCOT		T
	R20180100087_1,26485	K.CEFQDAYVLLSEK.K	1601.75	-0.00131	2	1	65.58	0	1.38e-05	0|0	sp|P10809|CH60_HUMAN/tr|A0A024R3X4|A0A024R3X4_HUMAN/tr|B9VPB4|B9VPB4_HUMAN/tr|B7Z4F6|B7Z4F6_HUMAN/tr|B9VP19|B9VP19_HUMAN/tr|B3GQS7|B3GQS7_HUMAN/tr|B7Z5E7|B7Z5E7_HUMAN/tr|B7Z597|B7Z597_HUMAN/tr|Q53QD5|Q53QD5_HUMAN		4.14	0		0	2	MASCOT		T
	R20180100087_1,8839	K.DDAM*LLK.G	821.407	-0.00021	2	1	30.58	0	0.0666	0|0	sp|P10809|CH60_HUMAN/tr|A0A024R3X4|A0A024R3X4_HUMAN/tr|B7Z4F6|B7Z4F6_HUMAN/tr|B7Z532|B7Z532_HUMAN/tr|B3GQS7|B3GQS7_HUMAN/tr|B7Z5E7|B7Z5E7_HUMAN		4.21	0	15.994919 Oxidation (M)	0	2	MASCOT		T
	R20180100087_1,32820	K.DMAIATGGAVFGEEGLTLNLEDVQPHDLGK.V	3097.51	0.00631	3	1	43.36	0	0.00256	0|0	sp|P10809|CH60_HUMAN/tr|A0A024R3X4|A0A024R3X4_HUMAN/tr|B7Z4F6|B7Z4F6_HUMAN/tr|B7Z532|B7Z532_HUMAN/tr|B3GQS7|B3GQS7_HUMAN/tr|B7Z5E7|B7Z5E7_HUMAN/tr|B7Z597|B7Z597_HUMAN		4.01	0		0	2	MASCOT		T
	R20180100087_1,22790	K.EIGNIISDAMK.K	1190.61	-0.00123	2	1	57.31	0	0.000166	0|0	sp|P10809|CH60_HUMAN/tr|E7EXB4|E7EXB4_HUMAN/tr|A0A024R3X4|A0A024R3X4_HUMAN/tr|E7ESH4|E7ESH4_HUMAN/tr|B7Z4F6|B7Z4F6_HUMAN/tr|Q53SE2|Q53SE2_HUMAN/tr|B7Z532|B7Z532_HUMAN/tr|B3GQS7|B3GQS7_HUMAN/tr|B7Z5E7|B7Z5E7_HUMAN/tr|B7Z597|B7Z597_HUMAN		4.37	0		0	2	MASCOT		T
	R20180100087_1,3792	K.FGADAR.A	636.31	7e-05	2	1	26.23	0	0.167	0|0	sp|P10809|CH60_HUMAN/tr|E7EXB4|E7EXB4_HUMAN/tr|C9J0S9|C9J0S9_HUMAN/tr|A0A024R3X4|A0A024R3X4_HUMAN/tr|E7ESH4|E7ESH4_HUMAN/tr|B7Z4F6|B7Z4F6_HUMAN/tr|F8WBB1|F8WBB1_HUMAN/tr|Q53SE2|Q53SE2_HUMAN/tr|C9JCQ4|C9JCQ4_HUMAN/tr|B3GQS7|B3GQS7_HUMAN/tr|C9JL25|C9JL25_HUMAN/tr|B7Z5E7|B7Z5E7_HUMAN/tr|A0A0S2Z415|A0A0S2Z415_HUMAN/tr|B7Z597|B7Z597_HUMAN/tr|C9JL19|C9JL19_HUMAN/tr|A0A0S2Z477|A0A0S2Z477_HUMAN		5.84	0		0	2	MASCOT		T
	R20180100087_1,8125	K.GANPVEIR.R	855.468	-0.00079	2	1	47.07	0	0.000784	0|0	sp|P10809|CH60_HUMAN/tr|E7EXB4|E7EXB4_HUMAN/tr|A0A024R3X4|A0A024R3X4_HUMAN/tr|E7ESH4|E7ESH4_HUMAN/tr|B9VPB4|B9VPB4_HUMAN/tr|B7Z4F6|B7Z4F6_HUMAN/tr|B9VP19|B9VP19_HUMAN/tr|Q53SE2|Q53SE2_HUMAN/tr|B3GQS7|B3GQS7_HUMAN/tr|A0A0S2Z415|A0A0S2Z415_HUMAN/tr|B9VP24|B9VP24_HUMAN		6	0		0	2	MASCOT		T
	R20180100087_1,8307	K.GIIDPTK.V	743.43	0.00013	2	1	33.76	0	0.0334	0|0	sp|P10809|CH60_HUMAN/tr|A0A024R3X4|A0A024R3X4_HUMAN/tr|B7Z4F6|B7Z4F6_HUMAN/tr|B3GQS7|B3GQS7_HUMAN/tr|B7Z5E7|B7Z5E7_HUMAN/tr|B7Z597|B7Z597_HUMAN		5.84	0		0	2	MASCOT		T
	R20180100087_1,18647	K.IGIEIIK.R	785.513	7e-05	2	1	46.29	0	0.00146	0|0	sp|P10809|CH60_HUMAN/tr|A0A024R3X4|A0A024R3X4_HUMAN/tr|B7Z4F6|B7Z4F6_HUMAN/tr|B3GQS7|B3GQS7_HUMAN/tr|B7Z5E7|B7Z5E7_HUMAN/tr|B7Z597|B7Z597_HUMAN		6	0		0	2	MASCOT		T
	R20180100087_1,26808	K.IMQSSSEVGYDAMAGDFVNM*VEK.G	2524.1	0.00175	2	1	49.93	0	0.000181	0|0	sp|P10809|CH60_HUMAN/tr|A0A024R3X4|A0A024R3X4_HUMAN/tr|B7Z4F6|B7Z4F6_HUMAN/tr|B3GQS7|B3GQS7_HUMAN/tr|B7Z5E7|B7Z5E7_HUMAN/tr|B7Z597|B7Z597_HUMAN		3.92	0	15.994919 Oxidation (M)	0	2	MASCOT		T
	R20180100087_1,28293	K.IMQSSSEVGYDAMAGDFVNMVEK.G	2508.11	-0.00273	2	1	107.78	0	3.92e-10	0|0	sp|P10809|CH60_HUMAN/tr|A0A024R3X4|A0A024R3X4_HUMAN/tr|B7Z4F6|B7Z4F6_HUMAN/tr|B3GQS7|B3GQS7_HUMAN/tr|B7Z5E7|B7Z5E7_HUMAN/tr|B7Z597|B7Z597_HUMAN		3.92	0		0	2	MASCOT		T
	R20180100087_1,28311	K.IMQSSSEVGYDAMAGDFVNMVEK.G	2508.11	0.0018	3	1	75.6	0	6.03e-07	0|0	sp|P10809|CH60_HUMAN/tr|A0A024R3X4|A0A024R3X4_HUMAN/tr|B7Z4F6|B7Z4F6_HUMAN/tr|B3GQS7|B3GQS7_HUMAN/tr|B7Z5E7|B7Z5E7_HUMAN/tr|B7Z597|B7Z597_HUMAN		3.92	0		0	2	MASCOT		T
	R20180100087_1,26891	K.ISSIQSIVPALEIANAHR.K	1919.07	0.00018	3	1	71.2	0	2.95e-06	0|0	sp|P10809|CH60_HUMAN/tr|A0A024R3X4|A0A024R3X4_HUMAN/tr|B7Z4F6|B7Z4F6_HUMAN/tr|B7Z532|B7Z532_HUMAN/tr|B3GQS7|B3GQS7_HUMAN/tr|B7Z5E7|B7Z5E7_HUMAN/tr|B7Z597|B7Z597_HUMAN/tr|Q53QD5|Q53QD5_HUMAN		6.75	0		0	2	MASCOT		T
	R20180100087_1,26935	K.ISSIQSIVPALEIANAHR.K	1919.07	0.00352	2	1	63.26	0	1.97e-05	0|0	sp|P10809|CH60_HUMAN/tr|A0A024R3X4|A0A024R3X4_HUMAN/tr|B7Z4F6|B7Z4F6_HUMAN/tr|B7Z532|B7Z532_HUMAN/tr|B3GQS7|B3GQS7_HUMAN/tr|B7Z5E7|B7Z5E7_HUMAN/tr|B7Z597|B7Z597_HUMAN/tr|Q53QD5|Q53QD5_HUMAN		6.75	0		0	2	MASCOT		T
	R20180100087_1,13057	K.LSDGVAVLK.V	901.535	0.00138	2	1	41.85	0	0.0146	0|0	sp|P10809|CH60_HUMAN/tr|A0A024R3X4|A0A024R3X4_HUMAN/tr|B7Z4F6|B7Z4F6_HUMAN/tr|B3GQS7|B3GQS7_HUMAN/tr|B7Z5E7|B7Z5E7_HUMAN/tr|B7Z597|B7Z597_HUMAN		5.84	0		0	2	MASCOT		T
	R20180100087_1,16259	K.LVQDVANNTNEEAGDGTTTATVLAR.S	2560.25	-0.00121	3	1	88.77	0	8.97e-08	0|0	sp|P10809|CH60_HUMAN/tr|E7EXB4|E7EXB4_HUMAN/tr|A0A024R3X4|A0A024R3X4_HUMAN/tr|E7ESH4|E7ESH4_HUMAN/tr|Q53SE2|Q53SE2_HUMAN/tr|B3GQS7|B3GQS7_HUMAN/tr|C9JL25|C9JL25_HUMAN/tr|A0A0S2Z415|A0A0S2Z415_HUMAN/tr|B7Z597|B7Z597_HUMAN		3.92	0		0	2	MASCOT		T
	R20180100087_1,17536	K.LVQDVANNTNEEAGDGTTTATVLAR.S	2560.25	-0.00979	2	1	20.81	0	2.49	0|0	sp|P10809|CH60_HUMAN/tr|E7EXB4|E7EXB4_HUMAN/tr|A0A024R3X4|A0A024R3X4_HUMAN/tr|E7ESH4|E7ESH4_HUMAN/tr|Q53SE2|Q53SE2_HUMAN/tr|B3GQS7|B3GQS7_HUMAN/tr|C9JL25|C9JL25_HUMAN/tr|A0A0S2Z415|A0A0S2Z415_HUMAN/tr|B7Z597|B7Z597_HUMAN		3.92	0		0	2	MASCOT		T
	R20180100087_1,17969	K.LVQDVANNTNEEAGDGTTTATVLAR.S	2560.25	0.01168	3	1	66.17	0	1.52e-05	0|0	sp|P10809|CH60_HUMAN/tr|E7EXB4|E7EXB4_HUMAN/tr|A0A024R3X4|A0A024R3X4_HUMAN/tr|E7ESH4|E7ESH4_HUMAN/tr|Q53SE2|Q53SE2_HUMAN/tr|B3GQS7|B3GQS7_HUMAN/tr|C9JL25|C9JL25_HUMAN/tr|A0A0S2Z415|A0A0S2Z415_HUMAN/tr|B7Z597|B7Z597_HUMAN		3.92	0		0	2	MASCOT		T
	R20180100087_1,14481	K.NAGVEGSLIVEK.I	1215.66	-0.00072	2	1	67.58	0	1.65e-05	0|0	sp|P10809|CH60_HUMAN/tr|A0A024R3X4|A0A024R3X4_HUMAN/tr|B7Z4F6|B7Z4F6_HUMAN/tr|B3GQS7|B3GQS7_HUMAN/tr|B7Z5E7|B7Z5E7_HUMAN/tr|B7Z597|B7Z597_HUMAN		4.53	0		0	2	MASCOT		T
	R20180100087_1,21159	K.QSKPVTTPEEIAQVATISANGDK.E	2384.23	-0.00218	2	1	119.08	0	2.58e-10	0|0	sp|P10809|CH60_HUMAN/tr|E7EXB4|E7EXB4_HUMAN/tr|A0A024R3X4|A0A024R3X4_HUMAN/tr|E7ESH4|E7ESH4_HUMAN/tr|B9VPB4|B9VPB4_HUMAN/tr|B7Z4F6|B7Z4F6_HUMAN/tr|B9VP19|B9VP19_HUMAN/tr|Q53SE2|Q53SE2_HUMAN/tr|B7Z532|B7Z532_HUMAN/tr|B3GQS7|B3GQS7_HUMAN/tr|B7Z597|B7Z597_HUMAN		4.68	0		0	2	MASCOT		T
	R20180100087_1,29112	K.QSKPVTTPEEIAQVATISANGDKEIGNIISDAMK.K	3555.82	-0.00106	4	1	69.87	0	4.87e-06	0|0	sp|P10809|CH60_HUMAN/tr|E7EXB4|E7EXB4_HUMAN/tr|A0A024R3X4|A0A024R3X4_HUMAN/tr|E7ESH4|E7ESH4_HUMAN/tr|B7Z4F6|B7Z4F6_HUMAN/tr|Q53SE2|Q53SE2_HUMAN/tr|B7Z532|B7Z532_HUMAN/tr|B3GQS7|B3GQS7_HUMAN/tr|B7Z597|B7Z597_HUMAN		4.51	1		0	2	MASCOT		T
	R20180100087_1,24858	K.TLNDELEIIEGM*K.F	1520.75	-0.00147	2	1	71.4	0	7.57e-06	0|0	sp|P10809|CH60_HUMAN/tr|E7EXB4|E7EXB4_HUMAN/tr|A0A024R3X4|A0A024R3X4_HUMAN/tr|E7ESH4|E7ESH4_HUMAN/tr|B7Z4F6|B7Z4F6_HUMAN/tr|Q53SE2|Q53SE2_HUMAN/tr|B7Z532|B7Z532_HUMAN/tr|B3GQS7|B3GQS7_HUMAN/tr|B7Z5E7|B7Z5E7_HUMAN/tr|B7Z597|B7Z597_HUMAN		4	0	15.994919 Oxidation (M)	0	2	MASCOT		T
	R20180100087_1,27495	K.TLNDELEIIEGMK.F	1504.76	5e-05	2	1	75.99	0	2.12e-06	0|0	sp|P10809|CH60_HUMAN/tr|E7EXB4|E7EXB4_HUMAN/tr|A0A024R3X4|A0A024R3X4_HUMAN/tr|E7ESH4|E7ESH4_HUMAN/tr|B7Z4F6|B7Z4F6_HUMAN/tr|Q53SE2|Q53SE2_HUMAN/tr|B7Z532|B7Z532_HUMAN/tr|B3GQS7|B3GQS7_HUMAN/tr|B7Z5E7|B7Z5E7_HUMAN/tr|B7Z597|B7Z597_HUMAN		4	0		0	2	MASCOT		T
	R20180100087_1,27498	K.TLNDELEIIEGMK.F	1504.76	0.00168	3	1	53.4	0	0.000379	0|0	sp|P10809|CH60_HUMAN/tr|E7EXB4|E7EXB4_HUMAN/tr|A0A024R3X4|A0A024R3X4_HUMAN/tr|E7ESH4|E7ESH4_HUMAN/tr|B7Z4F6|B7Z4F6_HUMAN/tr|Q53SE2|Q53SE2_HUMAN/tr|B7Z532|B7Z532_HUMAN/tr|B3GQS7|B3GQS7_HUMAN/tr|B7Z5E7|B7Z5E7_HUMAN/tr|B7Z597|B7Z597_HUMAN		4	0		0	2	MASCOT		T
	R20180100087_1,8196	K.VGEVIVTK.D	844.514	-0.00063	2	1	44.53	0	0.00311	0|0	sp|P10809|CH60_HUMAN/tr|A0A024R3X4|A0A024R3X4_HUMAN/tr|B7Z4F6|B7Z4F6_HUMAN/tr|B7Z532|B7Z532_HUMAN/tr|B3GQS7|B3GQS7_HUMAN/tr|B7Z5E7|B7Z5E7_HUMAN/tr|B7Z597|B7Z597_HUMAN		5.97	0		0	2	MASCOT		T
	R20180100087_1,6309	K.VGGTSDVEVNEK.K	1233.6	-0.00142	2	1	79.44	0	7.04e-07	0|0	sp|P10809|CH60_HUMAN/tr|A0A024R3X4|A0A024R3X4_HUMAN/tr|B7Z4F6|B7Z4F6_HUMAN/tr|B3GQS7|B3GQS7_HUMAN/tr|B7Z5E7|B7Z5E7_HUMAN/tr|B7Z597|B7Z597_HUMAN		4.14	0		0	2	MASCOT		T
	R20180100087_1,6870	K.VGGTSDVEVNEK.K	1233.6	0.00184	2	1	66.81	0	1.34e-05	0|0	sp|P10809|CH60_HUMAN/tr|A0A024R3X4|A0A024R3X4_HUMAN/tr|B7Z4F6|B7Z4F6_HUMAN/tr|B3GQS7|B3GQS7_HUMAN/tr|B7Z5E7|B7Z5E7_HUMAN/tr|B7Z597|B7Z597_HUMAN		4.14	0		0	2	MASCOT		T
	R20180100087_1,7915	K.VGGTSDVEVNEK.K	1233.6	-0.00166	2	1	59.24	0	7.37e-05	0|0	sp|P10809|CH60_HUMAN/tr|A0A024R3X4|A0A024R3X4_HUMAN/tr|B7Z4F6|B7Z4F6_HUMAN/tr|B3GQS7|B3GQS7_HUMAN/tr|B7Z5E7|B7Z5E7_HUMAN/tr|B7Z597|B7Z597_HUMAN		4.14	0		0	2	MASCOT		T
	R20180100087_1,8513	K.VGGTSDVEVNEK.K	1233.6	-0.00314	2	1	67.51	0	1.16e-05	0|0	sp|P10809|CH60_HUMAN/tr|A0A024R3X4|A0A024R3X4_HUMAN/tr|B7Z4F6|B7Z4F6_HUMAN/tr|B3GQS7|B3GQS7_HUMAN/tr|B7Z5E7|B7Z5E7_HUMAN/tr|B7Z597|B7Z597_HUMAN		4.14	0		0	2	MASCOT		T
	R20180100087_1,9153	K.VGGTSDVEVNEK.K	1233.6	0.00102	2	1	49.49	0	0.00176	0|0	sp|P10809|CH60_HUMAN/tr|A0A024R3X4|A0A024R3X4_HUMAN/tr|B7Z4F6|B7Z4F6_HUMAN/tr|B3GQS7|B3GQS7_HUMAN/tr|B7Z5E7|B7Z5E7_HUMAN/tr|B7Z597|B7Z597_HUMAN		4.14	0		0	2	MASCOT		T
	R20180100087_1,9813	K.VGGTSDVEVNEK.K	1233.6	0.00682	2	1	36.32	0	0.0393	0|0	sp|P10809|CH60_HUMAN/tr|A0A024R3X4|A0A024R3X4_HUMAN/tr|B7Z4F6|B7Z4F6_HUMAN/tr|B3GQS7|B3GQS7_HUMAN/tr|B7Z5E7|B7Z5E7_HUMAN/tr|B7Z597|B7Z597_HUMAN		4.14	0		0	2	MASCOT		T
	R20180100087_1,3501	K.VTKDGVTVAK.S	1017.59	0.00085	3	1	50.03	0	0.000721	0|0	sp|P10809|CH60_HUMAN/tr|E7EXB4|E7EXB4_HUMAN/tr|A0A024R3X4|A0A024R3X4_HUMAN/tr|E7ESH4|E7ESH4_HUMAN/tr|B7Z4F6|B7Z4F6_HUMAN/tr|Q53SE2|Q53SE2_HUMAN/tr|C9JCQ4|C9JCQ4_HUMAN/tr|B3GQS7|B3GQS7_HUMAN/tr|C9JL25|C9JL25_HUMAN/tr|B7Z5E7|B7Z5E7_HUMAN/tr|A0A0S2Z415|A0A0S2Z415_HUMAN/tr|B7Z597|B7Z597_HUMAN/tr|C9JL19|C9JL19_HUMAN		8.56	1		0	2	MASCOT		T
	R20180100087_1,3520	K.VTKDGVTVAK.S	1017.59	0.00078	2	1	38.14	0	0.0101	0|0	sp|P10809|CH60_HUMAN/tr|E7EXB4|E7EXB4_HUMAN/tr|A0A024R3X4|A0A024R3X4_HUMAN/tr|E7ESH4|E7ESH4_HUMAN/tr|B7Z4F6|B7Z4F6_HUMAN/tr|Q53SE2|Q53SE2_HUMAN/tr|C9JCQ4|C9JCQ4_HUMAN/tr|B3GQS7|B3GQS7_HUMAN/tr|C9JL25|C9JL25_HUMAN/tr|B7Z5E7|B7Z5E7_HUMAN/tr|A0A0S2Z415|A0A0S2Z415_HUMAN/tr|B7Z597|B7Z597_HUMAN/tr|C9JL19|C9JL19_HUMAN		8.56	1		0	2	MASCOT		T
	R20180100087_1,25929	R.AAVEEGIVLGGGCALLR.C	1684.91	-0.00135	2	1	64.62	0	2.7e-05	0|0	sp|P10809|CH60_HUMAN/tr|A0A024R3X4|A0A024R3X4_HUMAN/tr|B7Z4F6|B7Z4F6_HUMAN/tr|B3GQS7|B3GQS7_HUMAN/tr|B7Z5E7|B7Z5E7_HUMAN/tr|B7Z597|B7Z597_HUMAN		4.53	0		0	2	MASCOT		T
	R20180100087_1,27251	R.AAVEEGIVLGGGCALLR.C	1684.91	0.00247	2	1	24.43	0	0.289	0|0	sp|P10809|CH60_HUMAN/tr|A0A024R3X4|A0A024R3X4_HUMAN/tr|B7Z4F6|B7Z4F6_HUMAN/tr|B3GQS7|B3GQS7_HUMAN/tr|B7Z5E7|B7Z5E7_HUMAN/tr|B7Z597|B7Z597_HUMAN		4.53	0		0	2	MASCOT		T
	R20180100087_1,30043	R.ALM*LQGVDLLADAVAVTM*GPK.G ! R.ALM*LQGVDLLADAVAVTM*GPK.-	2145.13	-0.00016	3	1	40.23	0	0.00716	0|0	sp|P10809|CH60_HUMAN/tr|E7EXB4|E7EXB4_HUMAN/tr|A0A024R3X4|A0A024R3X4_HUMAN/tr|E7ESH4|E7ESH4_HUMAN/tr|Q53SE2|Q53SE2_HUMAN/tr|C9JCQ4|C9JCQ4_HUMAN/tr|B3GQS7|B3GQS7_HUMAN/tr|C9JL25|C9JL25_HUMAN/tr|B7Z5E7|B7Z5E7_HUMAN/tr|A0A0S2Z415|A0A0S2Z415_HUMAN/tr|B7Z597|B7Z597_HUMAN/tr|C9JL19|C9JL19_HUMAN ! tr|C9J0S9|C9J0S9_HUMAN		4.21	0	15.994919 Oxidation (M)	0	2	MASCOT		T
	R20180100087_1,31762	R.ALM*LQGVDLLADAVAVTMGPK.G ! R.ALM*LQGVDLLADAVAVTMGPK.-	2129.13	-0.00124	3	1	67.14	0	1.32e-05	0|0	sp|P10809|CH60_HUMAN/tr|E7EXB4|E7EXB4_HUMAN/tr|A0A024R3X4|A0A024R3X4_HUMAN/tr|E7ESH4|E7ESH4_HUMAN/tr|Q53SE2|Q53SE2_HUMAN/tr|C9JCQ4|C9JCQ4_HUMAN/tr|B3GQS7|B3GQS7_HUMAN/tr|C9JL25|C9JL25_HUMAN/tr|B7Z5E7|B7Z5E7_HUMAN/tr|A0A0S2Z415|A0A0S2Z415_HUMAN/tr|B7Z597|B7Z597_HUMAN/tr|C9JL19|C9JL19_HUMAN ! tr|C9J0S9|C9J0S9_HUMAN		4.21	0	15.994919 Oxidation (M)	0	2	MASCOT		T
	R20180100087_1,32400	R.ALM*LQGVDLLADAVAVTMGPK.G ! R.ALM*LQGVDLLADAVAVTMGPK.-	2129.13	-0.00253	3	1	59.8	0	7.27e-05	0|0	sp|P10809|CH60_HUMAN/tr|E7EXB4|E7EXB4_HUMAN/tr|A0A024R3X4|A0A024R3X4_HUMAN/tr|E7ESH4|E7ESH4_HUMAN/tr|Q53SE2|Q53SE2_HUMAN/tr|C9JCQ4|C9JCQ4_HUMAN/tr|B3GQS7|B3GQS7_HUMAN/tr|C9JL25|C9JL25_HUMAN/tr|B7Z5E7|B7Z5E7_HUMAN/tr|A0A0S2Z415|A0A0S2Z415_HUMAN/tr|B7Z597|B7Z597_HUMAN/tr|C9JL19|C9JL19_HUMAN ! tr|C9J0S9|C9J0S9_HUMAN		4.21	0	15.994919 Oxidation (M)	0	2	MASCOT		T
	R20180100087_1,32574	R.ALMLQGVDLLADAVAVTMGPK.G ! R.ALMLQGVDLLADAVAVTMGPK.-	2113.14	-0.00219	3	1	87.14	0	1.23e-07	0|0	sp|P10809|CH60_HUMAN/tr|E7EXB4|E7EXB4_HUMAN/tr|A0A024R3X4|A0A024R3X4_HUMAN/tr|E7ESH4|E7ESH4_HUMAN/tr|Q53SE2|Q53SE2_HUMAN/tr|C9JCQ4|C9JCQ4_HUMAN/tr|B3GQS7|B3GQS7_HUMAN/tr|C9JL25|C9JL25_HUMAN/tr|B7Z5E7|B7Z5E7_HUMAN/tr|A0A0S2Z415|A0A0S2Z415_HUMAN/tr|B7Z597|B7Z597_HUMAN/tr|C9JL19|C9JL19_HUMAN ! tr|C9J0S9|C9J0S9_HUMAN		4.21	0		0	2	MASCOT		T
	R20180100087_1,32590	R.ALMLQGVDLLADAVAVTMGPK.G ! R.ALMLQGVDLLADAVAVTMGPK.-	2113.14	-0.01379	2	1	129.06	0	6.97e-12	0|0	sp|P10809|CH60_HUMAN/tr|E7EXB4|E7EXB4_HUMAN/tr|A0A024R3X4|A0A024R3X4_HUMAN/tr|E7ESH4|E7ESH4_HUMAN/tr|Q53SE2|Q53SE2_HUMAN/tr|C9JCQ4|C9JCQ4_HUMAN/tr|B3GQS7|B3GQS7_HUMAN/tr|C9JL25|C9JL25_HUMAN/tr|B7Z5E7|B7Z5E7_HUMAN/tr|A0A0S2Z415|A0A0S2Z415_HUMAN/tr|B7Z597|B7Z597_HUMAN/tr|C9JL19|C9JL19_HUMAN ! tr|C9J0S9|C9J0S9_HUMAN		4.21	0		0	2	MASCOT		T
	R20180100087_1,33207	R.ALMLQGVDLLADAVAVTMGPK.G ! R.ALMLQGVDLLADAVAVTMGPK.-	2113.14	-0.00102	3	1	87.03	0	1.25e-07	0|0	sp|P10809|CH60_HUMAN/tr|E7EXB4|E7EXB4_HUMAN/tr|A0A024R3X4|A0A024R3X4_HUMAN/tr|E7ESH4|E7ESH4_HUMAN/tr|Q53SE2|Q53SE2_HUMAN/tr|C9JCQ4|C9JCQ4_HUMAN/tr|B3GQS7|B3GQS7_HUMAN/tr|C9JL25|C9JL25_HUMAN/tr|B7Z5E7|B7Z5E7_HUMAN/tr|A0A0S2Z415|A0A0S2Z415_HUMAN/tr|B7Z597|B7Z597_HUMAN/tr|C9JL19|C9JL19_HUMAN ! tr|C9J0S9|C9J0S9_HUMAN		4.21	0		0	2	MASCOT		T
	R20180100087_1,33717	R.ALMLQGVDLLADAVAVTMGPK.G ! R.ALMLQGVDLLADAVAVTMGPK.-	2113.14	-0.00144	3	1	90.3	0	5.89e-08	0|0	sp|P10809|CH60_HUMAN/tr|E7EXB4|E7EXB4_HUMAN/tr|A0A024R3X4|A0A024R3X4_HUMAN/tr|E7ESH4|E7ESH4_HUMAN/tr|Q53SE2|Q53SE2_HUMAN/tr|C9JCQ4|C9JCQ4_HUMAN/tr|B3GQS7|B3GQS7_HUMAN/tr|C9JL25|C9JL25_HUMAN/tr|B7Z5E7|B7Z5E7_HUMAN/tr|A0A0S2Z415|A0A0S2Z415_HUMAN/tr|B7Z597|B7Z597_HUMAN/tr|C9JL19|C9JL19_HUMAN ! tr|C9J0S9|C9J0S9_HUMAN		4.21	0		0	2	MASCOT		T
	R20180100087_1,34555	R.ALMLQGVDLLADAVAVTMGPK.G ! R.ALMLQGVDLLADAVAVTMGPK.-	2113.14	-0.00069	3	1	51.42	0	0.000455	0|0	sp|P10809|CH60_HUMAN/tr|E7EXB4|E7EXB4_HUMAN/tr|A0A024R3X4|A0A024R3X4_HUMAN/tr|E7ESH4|E7ESH4_HUMAN/tr|Q53SE2|Q53SE2_HUMAN/tr|C9JCQ4|C9JCQ4_HUMAN/tr|B3GQS7|B3GQS7_HUMAN/tr|C9JL25|C9JL25_HUMAN/tr|B7Z5E7|B7Z5E7_HUMAN/tr|A0A0S2Z415|A0A0S2Z415_HUMAN/tr|B7Z597|B7Z597_HUMAN/tr|C9JL19|C9JL19_HUMAN ! tr|C9J0S9|C9J0S9_HUMAN		4.21	0		0	2	MASCOT		T
	R20180100087_1,18404	R.CIPALDSLTPANEDQK.I	1771.85	-0.00285	2	1	77.72	0	5.51e-06	0|0	sp|P10809|CH60_HUMAN/tr|A0A024R3X4|A0A024R3X4_HUMAN/tr|B7Z4F6|B7Z4F6_HUMAN/tr|B3GQS7|B3GQS7_HUMAN/tr|B7Z5E7|B7Z5E7_HUMAN/tr|B7Z597|B7Z597_HUMAN		4.03	0		0	2	MASCOT		T
	R20180100087_1,21184	R.CIPALDSLTPANEDQK.I	1771.85	-0.00041	2	1	78.39	0	2.92e-06	0|0	sp|P10809|CH60_HUMAN/tr|A0A024R3X4|A0A024R3X4_HUMAN/tr|B7Z4F6|B7Z4F6_HUMAN/tr|B3GQS7|B3GQS7_HUMAN/tr|B7Z5E7|B7Z5E7_HUMAN/tr|B7Z597|B7Z597_HUMAN		4.03	0		0	2	MASCOT		T
	R20180100087_1,29222	R.GVM*LAVDAVIAELK.K ! K.GVM*LAVDAVIAELK.K	1444.81	0.00084	2	1	41.5	0	0.0046	0|0	sp|P10809|CH60_HUMAN/tr|E7EXB4|E7EXB4_HUMAN/tr|A0A024R3X4|A0A024R3X4_HUMAN/tr|E7ESH4|E7ESH4_HUMAN/tr|B7Z4F6|B7Z4F6_HUMAN/tr|Q53SE2|Q53SE2_HUMAN/tr|B3GQS7|B3GQS7_HUMAN ! tr|B7Z597|B7Z597_HUMAN		4.37	0	15.994919 Oxidation (M)	0	2	MASCOT		T
	R20180100087_1,30688	R.GVMLAVDAVIAELK.K ! K.GVMLAVDAVIAELK.K	1428.81	-0.00074	2	1	83.57	0	2.48e-07	0|0	sp|P10809|CH60_HUMAN/tr|E7EXB4|E7EXB4_HUMAN/tr|A0A024R3X4|A0A024R3X4_HUMAN/tr|E7ESH4|E7ESH4_HUMAN/tr|B7Z4F6|B7Z4F6_HUMAN/tr|Q53SE2|Q53SE2_HUMAN/tr|B3GQS7|B3GQS7_HUMAN ! tr|B7Z597|B7Z597_HUMAN		4.37	0		0	2	MASCOT		T
	R20180100087_1,30695	R.GVMLAVDAVIAELK.K ! K.GVMLAVDAVIAELK.K	1428.81	0.00037	3	1	60.98	0	4.4e-05	0|0	sp|P10809|CH60_HUMAN/tr|E7EXB4|E7EXB4_HUMAN/tr|A0A024R3X4|A0A024R3X4_HUMAN/tr|E7ESH4|E7ESH4_HUMAN/tr|B7Z4F6|B7Z4F6_HUMAN/tr|Q53SE2|Q53SE2_HUMAN/tr|B3GQS7|B3GQS7_HUMAN ! tr|B7Z597|B7Z597_HUMAN		4.37	0		0	2	MASCOT		T
	R20180100087_1,31336	R.GVMLAVDAVIAELK.K ! K.GVMLAVDAVIAELK.K	1428.81	0.00061	3	1	69.27	0	6.55e-06	0|0	sp|P10809|CH60_HUMAN/tr|E7EXB4|E7EXB4_HUMAN/tr|A0A024R3X4|A0A024R3X4_HUMAN/tr|E7ESH4|E7ESH4_HUMAN/tr|B7Z4F6|B7Z4F6_HUMAN/tr|Q53SE2|Q53SE2_HUMAN/tr|B3GQS7|B3GQS7_HUMAN ! tr|B7Z597|B7Z597_HUMAN		4.37	0		0	2	MASCOT		T
	R20180100087_1,31823	R.GVMLAVDAVIAELK.K ! K.GVMLAVDAVIAELK.K	1428.81	-0.00068	2	1	83.18	0	2.74e-07	0|0	sp|P10809|CH60_HUMAN/tr|E7EXB4|E7EXB4_HUMAN/tr|A0A024R3X4|A0A024R3X4_HUMAN/tr|E7ESH4|E7ESH4_HUMAN/tr|B7Z4F6|B7Z4F6_HUMAN/tr|Q53SE2|Q53SE2_HUMAN/tr|B3GQS7|B3GQS7_HUMAN ! tr|B7Z597|B7Z597_HUMAN		4.37	0		0	2	MASCOT		T
	R20180100087_1,32073	R.GVMLAVDAVIAELK.K ! K.GVMLAVDAVIAELK.K	1428.81	-0.00071	3	1	38.04	0	0.00893	0|0	sp|P10809|CH60_HUMAN/tr|E7EXB4|E7EXB4_HUMAN/tr|A0A024R3X4|A0A024R3X4_HUMAN/tr|E7ESH4|E7ESH4_HUMAN/tr|B7Z4F6|B7Z4F6_HUMAN/tr|Q53SE2|Q53SE2_HUMAN/tr|B3GQS7|B3GQS7_HUMAN ! tr|B7Z597|B7Z597_HUMAN		4.37	0		0	2	MASCOT		T
	R20180100087_1,32692	R.GVMLAVDAVIAELK.K ! K.GVMLAVDAVIAELK.K	1428.81	0.00098	2	1	70.05	0	5.48e-06	0|0	sp|P10809|CH60_HUMAN/tr|E7EXB4|E7EXB4_HUMAN/tr|A0A024R3X4|A0A024R3X4_HUMAN/tr|E7ESH4|E7ESH4_HUMAN/tr|B7Z4F6|B7Z4F6_HUMAN/tr|Q53SE2|Q53SE2_HUMAN/tr|B3GQS7|B3GQS7_HUMAN ! tr|B7Z597|B7Z597_HUMAN		4.37	0		0	2	MASCOT		T
	R20180100087_1,29579	R.GVMLAVDAVIAELKK.Q ! K.GVMLAVDAVIAELKK.Q	1556.91	0.00126	3	1	52.23	0	0.00022	0|0	sp|P10809|CH60_HUMAN/tr|E7EXB4|E7EXB4_HUMAN/tr|A0A024R3X4|A0A024R3X4_HUMAN/tr|E7ESH4|E7ESH4_HUMAN/tr|B7Z4F6|B7Z4F6_HUMAN/tr|Q53SE2|Q53SE2_HUMAN/tr|B3GQS7|B3GQS7_HUMAN ! tr|B7Z597|B7Z597_HUMAN		6.07	1		0	2	MASCOT		T
	R20180100087_1,29596	R.GVMLAVDAVIAELKK.Q ! K.GVMLAVDAVIAELKK.Q	1556.91	0.00112	2	1	61.36	0	2.67e-05	0|0	sp|P10809|CH60_HUMAN/tr|E7EXB4|E7EXB4_HUMAN/tr|A0A024R3X4|A0A024R3X4_HUMAN/tr|E7ESH4|E7ESH4_HUMAN/tr|B7Z4F6|B7Z4F6_HUMAN/tr|Q53SE2|Q53SE2_HUMAN/tr|B3GQS7|B3GQS7_HUMAN ! tr|B7Z597|B7Z597_HUMAN		6.07	1		0	2	MASCOT		T
	R20180100087_1,30622	R.IQEIIEQLDVTTSEYEK.E ! R.IQEIIEQLDVTTSEYEK.G	2038.02	-0.0003	2	1	66.1	0	5.49e-05	0|0	sp|P10809|CH60_HUMAN/tr|A0A024R3X4|A0A024R3X4_HUMAN/tr|B7Z5E7|B7Z5E7_HUMAN/tr|B7Z597|B7Z597_HUMAN ! tr|B3GQS7|B3GQS7_HUMAN		3.91	0		0	2	MASCOT		T
	R20180100087_1,25712	R.IQEIIEQLDVTTSEYEKEK.L	2295.16	0.00341	3	1	64.69	0	2.35e-05	0|0	sp|P10809|CH60_HUMAN/tr|A0A024R3X4|A0A024R3X4_HUMAN/tr|B7Z5E7|B7Z5E7_HUMAN/tr|B7Z597|B7Z597_HUMAN		4.14	1		0	2	MASCOT		T
	R20180100087_1,25744	R.IQEIIEQLDVTTSEYEKEK.L	2295.16	-0.01136	2	1	66.75	0	1.43e-05	0|0	sp|P10809|CH60_HUMAN/tr|A0A024R3X4|A0A024R3X4_HUMAN/tr|B7Z5E7|B7Z5E7_HUMAN/tr|B7Z597|B7Z597_HUMAN		4.14	1		0	2	MASCOT		T
	R20180100087_1,28235	R.KPLVIIAEDVDGEALSTLVLNR.L	2365.33	-0.00477	2	1	95.38	0	4.23e-09	0|0	sp|P10809|CH60_HUMAN/tr|A0A024R3X4|A0A024R3X4_HUMAN/tr|B9VPB4|B9VPB4_HUMAN/tr|B7Z4F6|B7Z4F6_HUMAN/tr|B9VP19|B9VP19_HUMAN/tr|B7Z532|B7Z532_HUMAN/tr|B3GQS7|B3GQS7_HUMAN/tr|B7Z5E7|B7Z5E7_HUMAN/tr|B7Z597|B7Z597_HUMAN		4.32	0		0	2	MASCOT		T
	R20180100087_1,28756	R.KPLVIIAEDVDGEALSTLVLNR.L	2365.33	0.00152	3	1	76.68	0	3.73e-07	0|0	sp|P10809|CH60_HUMAN/tr|A0A024R3X4|A0A024R3X4_HUMAN/tr|B9VPB4|B9VPB4_HUMAN/tr|B7Z4F6|B7Z4F6_HUMAN/tr|B9VP19|B9VP19_HUMAN/tr|B7Z532|B7Z532_HUMAN/tr|B3GQS7|B3GQS7_HUMAN/tr|B7Z5E7|B7Z5E7_HUMAN/tr|B7Z597|B7Z597_HUMAN		4.32	0		0	2	MASCOT		T
	R20180100087_1,28899	R.KPLVIIAEDVDGEALSTLVLNR.L	2365.33	-0.00177	2	1	123.21	0	7.38e-12	0|0	sp|P10809|CH60_HUMAN/tr|A0A024R3X4|A0A024R3X4_HUMAN/tr|B9VPB4|B9VPB4_HUMAN/tr|B7Z4F6|B7Z4F6_HUMAN/tr|B9VP19|B9VP19_HUMAN/tr|B7Z532|B7Z532_HUMAN/tr|B3GQS7|B3GQS7_HUMAN/tr|B7Z5E7|B7Z5E7_HUMAN/tr|B7Z597|B7Z597_HUMAN		4.32	0		0	2	MASCOT		T
	R20180100087_1,29403	R.KPLVIIAEDVDGEALSTLVLNR.L	2365.33	0.002	3	1	89.41	0	2e-08	0|0	sp|P10809|CH60_HUMAN/tr|A0A024R3X4|A0A024R3X4_HUMAN/tr|B9VPB4|B9VPB4_HUMAN/tr|B7Z4F6|B7Z4F6_HUMAN/tr|B9VP19|B9VP19_HUMAN/tr|B7Z532|B7Z532_HUMAN/tr|B3GQS7|B3GQS7_HUMAN/tr|B7Z5E7|B7Z5E7_HUMAN/tr|B7Z597|B7Z597_HUMAN		4.32	0		0	2	MASCOT		T
	R20180100087_1,30054	R.KPLVIIAEDVDGEALSTLVLNR.L	2365.33	0.00083	3	1	91.78	0	1.15e-08	0|0	sp|P10809|CH60_HUMAN/tr|A0A024R3X4|A0A024R3X4_HUMAN/tr|B9VPB4|B9VPB4_HUMAN/tr|B7Z4F6|B7Z4F6_HUMAN/tr|B9VP19|B9VP19_HUMAN/tr|B7Z532|B7Z532_HUMAN/tr|B3GQS7|B3GQS7_HUMAN/tr|B7Z5E7|B7Z5E7_HUMAN/tr|B7Z597|B7Z597_HUMAN		4.32	0		0	2	MASCOT		T
	R20180100087_1,30705	R.KPLVIIAEDVDGEALSTLVLNR.L	2365.33	0.00047	3	1	83.95	0	6.81e-08	0|0	sp|P10809|CH60_HUMAN/tr|A0A024R3X4|A0A024R3X4_HUMAN/tr|B9VPB4|B9VPB4_HUMAN/tr|B7Z4F6|B7Z4F6_HUMAN/tr|B9VP19|B9VP19_HUMAN/tr|B7Z532|B7Z532_HUMAN/tr|B3GQS7|B3GQS7_HUMAN/tr|B7Z5E7|B7Z5E7_HUMAN/tr|B7Z597|B7Z597_HUMAN		4.32	0		0	2	MASCOT		T
	R20180100087_1,31335	R.KPLVIIAEDVDGEALSTLVLNR.L	2365.33	-0.00397	3	1	88.06	0	2.38e-08	0|0	sp|P10809|CH60_HUMAN/tr|A0A024R3X4|A0A024R3X4_HUMAN/tr|B9VPB4|B9VPB4_HUMAN/tr|B7Z4F6|B7Z4F6_HUMAN/tr|B9VP19|B9VP19_HUMAN/tr|B7Z532|B7Z532_HUMAN/tr|B3GQS7|B3GQS7_HUMAN/tr|B7Z5E7|B7Z5E7_HUMAN/tr|B7Z597|B7Z597_HUMAN		4.32	0		0	2	MASCOT		T
	R20180100087_1,31960	R.KPLVIIAEDVDGEALSTLVLNR.L	2365.33	-0.00301	3	1	79.89	0	1.56e-07	0|0	sp|P10809|CH60_HUMAN/tr|A0A024R3X4|A0A024R3X4_HUMAN/tr|B9VPB4|B9VPB4_HUMAN/tr|B7Z4F6|B7Z4F6_HUMAN/tr|B9VP19|B9VP19_HUMAN/tr|B7Z532|B7Z532_HUMAN/tr|B3GQS7|B3GQS7_HUMAN/tr|B7Z5E7|B7Z5E7_HUMAN/tr|B7Z597|B7Z597_HUMAN		4.32	0		0	2	MASCOT		T
	R20180100087_1,32965	R.KPLVIIAEDVDGEALSTLVLNR.L	2365.33	0.00173	3	1	76.23	0	4.17e-07	0|0	sp|P10809|CH60_HUMAN/tr|A0A024R3X4|A0A024R3X4_HUMAN/tr|B9VPB4|B9VPB4_HUMAN/tr|B7Z4F6|B7Z4F6_HUMAN/tr|B9VP19|B9VP19_HUMAN/tr|B7Z532|B7Z532_HUMAN/tr|B3GQS7|B3GQS7_HUMAN/tr|B7Z5E7|B7Z5E7_HUMAN/tr|B7Z597|B7Z597_HUMAN		4.32	0		0	2	MASCOT		T
	R20180100087_1,29089	R.RGVMLAVDAVIAELK.K	1584.91	-0.0002	3	1	71.78	0	2.48e-06	0|0	sp|P10809|CH60_HUMAN/tr|E7EXB4|E7EXB4_HUMAN/tr|A0A024R3X4|A0A024R3X4_HUMAN/tr|E7ESH4|E7ESH4_HUMAN/tr|B7Z4F6|B7Z4F6_HUMAN/tr|Q53SE2|Q53SE2_HUMAN/tr|B3GQS7|B3GQS7_HUMAN		6.07	1		0	2	MASCOT		T
	R20180100087_1,32890	R.TALLDAAGVASLLTTAEVVVTEIPK.E	2482.4	-0.00244	2	1	131.51	0	1.59e-12	0|0	sp|P10809|CH60_HUMAN/tr|A0A024R3X4|A0A024R3X4_HUMAN/tr|B7Z4F6|B7Z4F6_HUMAN/tr|B3GQS7|B3GQS7_HUMAN/tr|B7Z5E7|B7Z5E7_HUMAN/tr|B7Z597|B7Z597_HUMAN		4.14	0		0	2	MASCOT		T
	R20180100087_1,32910	R.TALLDAAGVASLLTTAEVVVTEIPK.E	2482.4	-0.00197	3	1	90.86	0	1.85e-08	0|0	sp|P10809|CH60_HUMAN/tr|A0A024R3X4|A0A024R3X4_HUMAN/tr|B7Z4F6|B7Z4F6_HUMAN/tr|B3GQS7|B3GQS7_HUMAN/tr|B7Z5E7|B7Z5E7_HUMAN/tr|B7Z597|B7Z597_HUMAN		4.14	0		0	2	MASCOT		T
	R20180100087_1,32548	R.TALLDAAGVASLLTTAEVVVTEIPKEEK.D	2868.58	-2e-05	3	1	101.84	0	1.76e-09	0|0	sp|P10809|CH60_HUMAN/tr|A0A024R3X4|A0A024R3X4_HUMAN/tr|B7Z4F6|B7Z4F6_HUMAN/tr|B3GQS7|B3GQS7_HUMAN/tr|B7Z5E7|B7Z5E7_HUMAN/tr|B7Z597|B7Z597_HUMAN		4.25	1		0	2	MASCOT		T
	R20180100087_1,17917	R.TVIIEQSWGSPK.V	1344.72	-0.00108	2	1	57.32	0	0.000163	0|0	sp|P10809|CH60_HUMAN/tr|E7EXB4|E7EXB4_HUMAN/tr|A0A024R3X4|A0A024R3X4_HUMAN/tr|E7ESH4|E7ESH4_HUMAN/tr|Q53SE2|Q53SE2_HUMAN/tr|C9JCQ4|C9JCQ4_HUMAN/tr|B3GQS7|B3GQS7_HUMAN/tr|C9JL25|C9JL25_HUMAN/tr|B7Z5E7|B7Z5E7_HUMAN/tr|A0A0S2Z415|A0A0S2Z415_HUMAN/tr|B7Z597|B7Z597_HUMAN/tr|C9JL19|C9JL19_HUMAN		5.66	0		0	2	MASCOT		T
	R20180100087_1,7010	R.VTDALNATR.A	960.511	-0.00085	2	1	21.79	0	0.743	0|0	sp|P10809|CH60_HUMAN/tr|A0A024R3X4|A0A024R3X4_HUMAN/tr|B7Z4F6|B7Z4F6_HUMAN/tr|B3GQS7|B3GQS7_HUMAN/tr|B7Z5E7|B7Z5E7_HUMAN/tr|B7Z597|B7Z597_HUMAN		5.81	0		0	2	MASCOT		T
$8-1	sp|P38646|GRP75_HUMAN Stress-70 protein, mitochondrial OS=Homo sapiens GN=HSPA9 PE=1 SV=2	52	32	0.5214	73679.6	5.87
$8-2	tr|B7Z4V2|B7Z4V2_HUMAN cDNA FLJ51907, highly similar to Stress-70 protein, mitochondrial OS=Homo sapiens PE=2 SV=1	52	32	0.5323	72400.2	5.7
$8-3	tr|V9HW84|V9HW84_HUMAN Epididymis secretory sperm binding protein Li 124m OS=Homo sapiens GN=HEL-S-124m PE=2 SV=1	52	32	0.5214	73778.8	5.97
	R20180100087_1,2767	K.AM*QDAEVSK.S	994.451	0.00047	2	1	32.92	0	0.0194	0|0	sp|P38646|GRP75_HUMAN/tr|H0YBG6|H0YBG6_HUMAN/tr|A1XP52|A1XP52_HUMAN/tr|Q8N1C8|Q8N1C8_HUMAN/tr|B7Z1V7|B7Z1V7_HUMAN/tr|B7Z4V2|B7Z4V2_HUMAN/tr|B7Z4T3|B7Z4T3_HUMAN/tr|V9HW84|V9HW84_HUMAN		4.37	0	15.994919 Oxidation (M)	0	2	MASCOT		T
	R20180100087_1,20686	K.DAGQISGLNVLR.V ! K.DAGQISGLNVLR.A	1242.68	-0.00224	2	1	43.37	0	0.00369	0|0	sp|P38646|GRP75_HUMAN/tr|Q8N1C8|Q8N1C8_HUMAN/tr|B7Z1V7|B7Z1V7_HUMAN/tr|B7Z4V2|B7Z4V2_HUMAN/tr|V9HW84|V9HW84_HUMAN ! tr|B7Z4T3|B7Z4T3_HUMAN		5.84	0		0	2	MASCOT		T
	R20180100087_1,13738	K.DDIENMVK.N	963.445	5e-05	2	1	28.11	0	0.172	0|0	sp|P38646|GRP75_HUMAN/tr|A1XP52|A1XP52_HUMAN/tr|Q8N1C8|Q8N1C8_HUMAN/tr|H0Y8S0|H0Y8S0_HUMAN/tr|B7Z4V2|B7Z4V2_HUMAN/tr|B7Z4T3|B7Z4T3_HUMAN/tr|V9HW84|V9HW84_HUMAN		4.03	0		0	2	MASCOT		T
	R20180100087_1,5383	K.DQLPADECNK.L	1189.52	0.00092	2	1	43.76	0	0.000778	0|0	sp|P38646|GRP75_HUMAN/tr|A1XP52|A1XP52_HUMAN/tr|Q8N1C8|Q8N1C8_HUMAN/tr|B7Z4V2|B7Z4V2_HUMAN/tr|B7Z4T3|B7Z4T3_HUMAN/tr|V9HW84|V9HW84_HUMAN		4.03	0		0	2	MASCOT		T
	R20180100087_1,23776	K.ERVEAVNMAEGIIHDTETK.M	2142.05	-0.0026	4	1	49.62	0	0.00129	0|0	sp|P38646|GRP75_HUMAN/tr|A1XP52|A1XP52_HUMAN/tr|Q8N1C8|Q8N1C8_HUMAN/tr|B7Z4V2|B7Z4V2_HUMAN/tr|B7Z4T3|B7Z4T3_HUMAN/tr|V9HW84|V9HW84_HUMAN		4.57	1		0	2	MASCOT		T
	R20180100087_1,23822	K.ERVEAVNMAEGIIHDTETK.M	2142.05	0.0048	2	1	54.59	0	0.000752	0|0	sp|P38646|GRP75_HUMAN/tr|A1XP52|A1XP52_HUMAN/tr|Q8N1C8|Q8N1C8_HUMAN/tr|B7Z4V2|B7Z4V2_HUMAN/tr|B7Z4T3|B7Z4T3_HUMAN/tr|V9HW84|V9HW84_HUMAN		4.57	1		0	2	MASCOT		T
	R20180100087_1,25270	K.GAVVGIDLGTTNSCVAVMEGK.Q ! K.GAVVGIDLGTTNSCVAVMEGK.R	2078.03	-0.00323	2	1	132.1	0	5.22e-12	0|0	sp|P38646|GRP75_HUMAN/tr|B7Z4V2|B7Z4V2_HUMAN/tr|V9HW84|V9HW84_HUMAN ! tr|Q8N1C8|Q8N1C8_HUMAN		4.37	0		0	2	MASCOT		T
	R20180100087_1,17430	K.LFEMAYK.K	901.449	-0.00165	2	1	25.23	0	0.154	0|0	sp|P38646|GRP75_HUMAN/tr|A1XP52|A1XP52_HUMAN/tr|Q8N1C8|Q8N1C8_HUMAN/tr|B7Z4V2|B7Z4V2_HUMAN/tr|B7Z4T3|B7Z4T3_HUMAN/tr|V9HW84|V9HW84_HUMAN		6	0		0	2	MASCOT		T
	R20180100087_1,3797	K.LKEEISK.M	846.493	1e-05	2	1	49	0	0.00102	0|0	sp|P38646|GRP75_HUMAN/tr|A1XP52|A1XP52_HUMAN/tr|Q8N1C8|Q8N1C8_HUMAN/tr|B7Z4V2|B7Z4V2_HUMAN/tr|B7Z4T3|B7Z4T3_HUMAN/tr|V9HW84|V9HW84_HUMAN		6.14	1		0	2	MASCOT		T
	R20180100087_1,28419	K.LLGQFTLIGIPPAPR.G	1592.95	0.00012	2	1	68.1	0	1.26e-06	0|0	sp|P38646|GRP75_HUMAN/tr|A1XP52|A1XP52_HUMAN/tr|Q8N1C8|Q8N1C8_HUMAN/tr|H0Y8S0|H0Y8S0_HUMAN/tr|B7Z4V2|B7Z4V2_HUMAN/tr|B7Z4T3|B7Z4T3_HUMAN/tr|V9HW84|V9HW84_HUMAN		9.75	0		0	2	MASCOT		T
	R20180100087_1,28443	K.LLGQFTLIGIPPAPR.G	1592.95	-0.0013	3	1	49.15	0	0.00011	0|0	sp|P38646|GRP75_HUMAN/tr|A1XP52|A1XP52_HUMAN/tr|Q8N1C8|Q8N1C8_HUMAN/tr|H0Y8S0|H0Y8S0_HUMAN/tr|B7Z4V2|B7Z4V2_HUMAN/tr|B7Z4T3|B7Z4T3_HUMAN/tr|V9HW84|V9HW84_HUMAN		9.75	0		0	2	MASCOT		T
	R20180100087_1,11532	K.M*EEFKDQLPADECNK.L	1869.8	0.00077	3	1	34.28	0	0.00472	0|0	sp|P38646|GRP75_HUMAN/tr|Q8N1C8|Q8N1C8_HUMAN/tr|B7Z4V2|B7Z4V2_HUMAN/tr|B7Z4T3|B7Z4T3_HUMAN/tr|V9HW84|V9HW84_HUMAN		4.18	1	15.994919 Oxidation (M)	0	2	MASCOT		T
	R20180100087_1,5993	K.MEEFK.D ! K.MEEFK.I	683.307	0.00197	1	1	29.98	0	0.0663	0|0	sp|P38646|GRP75_HUMAN/tr|Q8N1C8|Q8N1C8_HUMAN/tr|B7Z4V2|B7Z4V2_HUMAN/tr|B7Z4T3|B7Z4T3_HUMAN/tr|V9HW84|V9HW84_HUMAN ! sp|Q86UP2|KTN1_HUMAN/tr|A0A024R663|A0A024R663_HUMAN		4.53	0		0	2	MASCOT		T
	R20180100087_1,13401	K.MEEFKDQLPADECNK.L	1853.8	0.00119	3	1	32.22	0	0.0103	0|0	sp|P38646|GRP75_HUMAN/tr|Q8N1C8|Q8N1C8_HUMAN/tr|B7Z4V2|B7Z4V2_HUMAN/tr|B7Z4T3|B7Z4T3_HUMAN/tr|V9HW84|V9HW84_HUMAN		4.18	1		0	2	MASCOT		T
	R20180100087_1,13406	K.MEEFKDQLPADECNK.L	1853.8	0.00047	2	1	76.36	0	1.11e-06	0|0	sp|P38646|GRP75_HUMAN/tr|Q8N1C8|Q8N1C8_HUMAN/tr|B7Z4V2|B7Z4V2_HUMAN/tr|B7Z4T3|B7Z4T3_HUMAN/tr|V9HW84|V9HW84_HUMAN		4.18	1		0	2	MASCOT		T
	R20180100087_1,8560	K.MKETAENYLGHTAK.N	1592.77	0.00076	2	1	64.09	0	3.01e-05	0|0	sp|P38646|GRP75_HUMAN/tr|B7Z1V7|B7Z1V7_HUMAN/tr|B7Z4V2|B7Z4V2_HUMAN/tr|B7Z4T3|B7Z4T3_HUMAN/tr|V9HW84|V9HW84_HUMAN/tr|Q2F839|Q2F839_HUMAN		6.51	1		0	2	MASCOT		T
	R20180100087_1,23478	K.NAVITVPAYFNDSQR.Q	1694.85	-7e-05	2	1	30.69	0	0.0698	0|0	sp|P38646|GRP75_HUMAN/tr|Q8N1C8|Q8N1C8_HUMAN/tr|B7Z1V7|B7Z1V7_HUMAN/tr|B7Z4V2|B7Z4V2_HUMAN/tr|B7Z4T3|B7Z4T3_HUMAN/tr|V9HW84|V9HW84_HUMAN/tr|Q2F839|Q2F839_HUMAN		5.84	0		0	2	MASCOT		T
	R20180100087_1,25925	K.SDIGEVILVGGMTR.M	1446.76	0.00093	2	1	75.83	0	2.5e-06	0|0	sp|P38646|GRP75_HUMAN/tr|H0YBG6|H0YBG6_HUMAN/tr|A1XP52|A1XP52_HUMAN/tr|Q8N1C8|Q8N1C8_HUMAN/tr|B7Z1V7|B7Z1V7_HUMAN/tr|B7Z4V2|B7Z4V2_HUMAN/tr|B7Z4T3|B7Z4T3_HUMAN/tr|V9HW84|V9HW84_HUMAN		4.37	0		0	2	MASCOT		T
	R20180100087_1,16159	K.SQVFSTAADGQTQVEIK.V	1808.9	-0.00387	2	1	109.08	0	2.19e-09	0|0	sp|P38646|GRP75_HUMAN/tr|A1XP52|A1XP52_HUMAN/tr|Q8N1C8|Q8N1C8_HUMAN/tr|B7Z1V7|B7Z1V7_HUMAN/tr|B7Z4V2|B7Z4V2_HUMAN/tr|B7Z4T3|B7Z4T3_HUMAN/tr|V9HW84|V9HW84_HUMAN		4.37	0		0	2	MASCOT		T
	R20180100087_1,16941	K.SQVFSTAADGQTQVEIK.V	1808.9	0.00307	2	1	126.67	0	3.74e-11	0|0	sp|P38646|GRP75_HUMAN/tr|A1XP52|A1XP52_HUMAN/tr|Q8N1C8|Q8N1C8_HUMAN/tr|B7Z1V7|B7Z1V7_HUMAN/tr|B7Z4V2|B7Z4V2_HUMAN/tr|B7Z4T3|B7Z4T3_HUMAN/tr|V9HW84|V9HW84_HUMAN		4.37	0		0	2	MASCOT		T
	R20180100087_1,17570	K.SQVFSTAADGQTQVEIK.V	1808.9	-0.00083	2	1	92.11	0	1.08e-07	0|0	sp|P38646|GRP75_HUMAN/tr|A1XP52|A1XP52_HUMAN/tr|Q8N1C8|Q8N1C8_HUMAN/tr|B7Z1V7|B7Z1V7_HUMAN/tr|B7Z4V2|B7Z4V2_HUMAN/tr|B7Z4T3|B7Z4T3_HUMAN/tr|V9HW84|V9HW84_HUMAN		4.37	0		0	2	MASCOT		T
	R20180100087_1,19556	K.SQVFSTAADGQTQVEIK.V	1808.9	-0.00163	2	1	67.34	0	3.27e-05	0|0	sp|P38646|GRP75_HUMAN/tr|A1XP52|A1XP52_HUMAN/tr|Q8N1C8|Q8N1C8_HUMAN/tr|B7Z1V7|B7Z1V7_HUMAN/tr|B7Z4V2|B7Z4V2_HUMAN/tr|B7Z4T3|B7Z4T3_HUMAN/tr|V9HW84|V9HW84_HUMAN		4.37	0		0	2	MASCOT		T
	R20180100087_1,27518	K.STNGDTFLGGEDFDQALLR.H	2055.96	-0.00082	2	1	109.92	0	5.3e-10	0|0	sp|P38646|GRP75_HUMAN/tr|Q8N1C8|Q8N1C8_HUMAN/tr|B7Z1V7|B7Z1V7_HUMAN/tr|B7Z4V2|B7Z4V2_HUMAN/tr|B7Z4T3|B7Z4T3_HUMAN/tr|V9HW84|V9HW84_HUMAN/tr|Q2F839|Q2F839_HUMAN		3.84	0		0	2	MASCOT		T
	R20180100087_1,27551	K.STNGDTFLGGEDFDQALLR.H	2055.96	0.00396	3	1	49.41	0	0.000544	0|0	sp|P38646|GRP75_HUMAN/tr|Q8N1C8|Q8N1C8_HUMAN/tr|B7Z1V7|B7Z1V7_HUMAN/tr|B7Z4V2|B7Z4V2_HUMAN/tr|B7Z4T3|B7Z4T3_HUMAN/tr|V9HW84|V9HW84_HUMAN/tr|Q2F839|Q2F839_HUMAN		3.84	0		0	2	MASCOT		T
	R20180100087_1,30244	K.VIAVYDLGGGTFDISILEIQK.G	2251.22	0.0017	2	1	45.53	0	0.00116	0|0	sp|P38646|GRP75_HUMAN/tr|Q8N1C8|Q8N1C8_HUMAN/tr|B7Z1V7|B7Z1V7_HUMAN/tr|B7Z4V2|B7Z4V2_HUMAN/tr|B7Z4T3|B7Z4T3_HUMAN/tr|V9HW84|V9HW84_HUMAN/tr|Q2F839|Q2F839_HUMAN		4.03	0		0	2	MASCOT		T
	R20180100087_1,30979	K.VIAVYDLGGGTFDISILEIQK.G	2251.22	0.0007	2	1	49.94	0	0.000416	0|0	sp|P38646|GRP75_HUMAN/tr|Q8N1C8|Q8N1C8_HUMAN/tr|B7Z1V7|B7Z1V7_HUMAN/tr|B7Z4V2|B7Z4V2_HUMAN/tr|B7Z4T3|B7Z4T3_HUMAN/tr|V9HW84|V9HW84_HUMAN/tr|Q2F839|Q2F839_HUMAN		4.03	0		0	2	MASCOT		T
	R20180100087_1,32565	K.VIAVYDLGGGTFDISILEIQK.G	2251.22	-0.0113	2	1	54.17	0	0.000134	0|0	sp|P38646|GRP75_HUMAN/tr|Q8N1C8|Q8N1C8_HUMAN/tr|B7Z1V7|B7Z1V7_HUMAN/tr|B7Z4V2|B7Z4V2_HUMAN/tr|B7Z4T3|B7Z4T3_HUMAN/tr|V9HW84|V9HW84_HUMAN/tr|Q2F839|Q2F839_HUMAN		4.03	0		0	2	MASCOT		T
	R20180100087_1,4690	K.VLENAEGAR.T	958.495	-0.00052	2	1	59.24	0	7.6e-05	0|0	sp|P38646|GRP75_HUMAN/tr|Q8N1C8|Q8N1C8_HUMAN/tr|B7Z1V7|B7Z1V7_HUMAN/tr|D6RA73|D6RA73_HUMAN/tr|D6RJI2|D6RJI2_HUMAN/tr|B7Z4V2|B7Z4V2_HUMAN/tr|V9HW84|V9HW84_HUMAN		4.53	0		0	2	MASCOT		T
	R20180100087_1,20032	K.VQQTVQDLFGR.A	1290.68	0.00337	2	1	48.79	0	0.00119	0|0	sp|P38646|GRP75_HUMAN/tr|A1XP52|A1XP52_HUMAN/tr|Q8N1C8|Q8N1C8_HUMAN/tr|B7Z1V7|B7Z1V7_HUMAN/tr|B7Z4V2|B7Z4V2_HUMAN/tr|B7Z4T3|B7Z4T3_HUMAN/tr|V9HW84|V9HW84_HUMAN		5.81	0		0	2	MASCOT		T
	R20180100087_1,2421	K.YAEEDRR.K	938.433	0	2	1	21.82	0	0.272	0|0	sp|P38646|GRP75_HUMAN/tr|A1XP52|A1XP52_HUMAN/tr|Q8N1C8|Q8N1C8_HUMAN/tr|H0Y8S0|H0Y8S0_HUMAN/tr|B7Z4V2|B7Z4V2_HUMAN/tr|B7Z4T3|B7Z4T3_HUMAN/tr|V9HW84|V9HW84_HUMAN		4.68	1		0	2	MASCOT		T
	R20180100087_1,27853	R.AQFEGIVTDLIR.R	1361.74	-0.00023	2	1	62.3	0	6.51e-05	0|0	sp|P38646|GRP75_HUMAN/tr|H0YBG6|H0YBG6_HUMAN/tr|A1XP52|A1XP52_HUMAN/tr|Q8N1C8|Q8N1C8_HUMAN/tr|B7Z1V7|B7Z1V7_HUMAN/tr|B7Z4V2|B7Z4V2_HUMAN/tr|B7Z4T3|B7Z4T3_HUMAN/tr|V9HW84|V9HW84_HUMAN		4.37	0		0	2	MASCOT		T
	R20180100087_1,27881	R.AQFEGIVTDLIR.R	1361.74	-0.00153	3	1	54.55	0	0.000386	0|0	sp|P38646|GRP75_HUMAN/tr|H0YBG6|H0YBG6_HUMAN/tr|A1XP52|A1XP52_HUMAN/tr|Q8N1C8|Q8N1C8_HUMAN/tr|B7Z1V7|B7Z1V7_HUMAN/tr|B7Z4V2|B7Z4V2_HUMAN/tr|B7Z4T3|B7Z4T3_HUMAN/tr|V9HW84|V9HW84_HUMAN		4.37	0		0	2	MASCOT		T
	R20180100087_1,7901	R.ASNGDAWVEAHGK.L	1341.62	7e-05	2	1	61.13	0	3.37e-05	0|0	sp|P38646|GRP75_HUMAN/tr|Q8N1C8|Q8N1C8_HUMAN/tr|B7Z1V7|B7Z1V7_HUMAN/tr|D6RJI2|D6RJI2_HUMAN/tr|B7Z4V2|B7Z4V2_HUMAN/tr|V9HW84|V9HW84_HUMAN		5.32	0		0	2	MASCOT		T
	R20180100087_1,7911	R.ASNGDAWVEAHGK.L	1341.62	0.00027	3	1	52.42	0	0.000251	0|0	sp|P38646|GRP75_HUMAN/tr|Q8N1C8|Q8N1C8_HUMAN/tr|B7Z1V7|B7Z1V7_HUMAN/tr|D6RJI2|D6RJI2_HUMAN/tr|B7Z4V2|B7Z4V2_HUMAN/tr|V9HW84|V9HW84_HUMAN		5.32	0		0	2	MASCOT		T
	R20180100087_1,850	R.EGSGSSGTGEQK.E	1123.49	0.0002	2	1	53.51	0	0.000163	0|0	sp|P38646|GRP75_HUMAN/tr|A1XP52|A1XP52_HUMAN/tr|Q8N1C8|Q8N1C8_HUMAN/tr|B7Z4V2|B7Z4V2_HUMAN/tr|B7Z4T3|B7Z4T3_HUMAN/tr|V9HW84|V9HW84_HUMAN		4.53	0		0	2	MASCOT		T
	R20180100087_1,13244	R.EQQIVIQSSGGLSK.D	1473.79	0.00339	2	1	69.88	0	9.08e-06	0|0	sp|P38646|GRP75_HUMAN/tr|Q8N1C8|Q8N1C8_HUMAN/tr|H0Y8S0|H0Y8S0_HUMAN/tr|B7Z4V2|B7Z4V2_HUMAN/tr|B7Z4T3|B7Z4T3_HUMAN/tr|V9HW84|V9HW84_HUMAN		6.1	0		0	2	MASCOT		T
	R20180100087_1,13876	R.EQQIVIQSSGGLSK.D	1473.79	-0.00131	2	1	33.32	0	0.0424	0|0	sp|P38646|GRP75_HUMAN/tr|Q8N1C8|Q8N1C8_HUMAN/tr|H0Y8S0|H0Y8S0_HUMAN/tr|B7Z4V2|B7Z4V2_HUMAN/tr|B7Z4T3|B7Z4T3_HUMAN/tr|V9HW84|V9HW84_HUMAN		6.1	0		0	2	MASCOT		T
	R20180100087_1,14782	R.EQQIVIQSSGGLSK.D	1473.79	0.00241	2	1	38.75	0	0.0303	0|0	sp|P38646|GRP75_HUMAN/tr|Q8N1C8|Q8N1C8_HUMAN/tr|H0Y8S0|H0Y8S0_HUMAN/tr|B7Z4V2|B7Z4V2_HUMAN/tr|B7Z4T3|B7Z4T3_HUMAN/tr|V9HW84|V9HW84_HUMAN		6.1	0		0	2	MASCOT		T
	R20180100087_1,22504	R.EQQIVIQSSGGLSKDDIENMVK.N	2418.22	0.01612	3	1	37.57	0	0.0482	0|0	sp|P38646|GRP75_HUMAN/tr|Q8N1C8|Q8N1C8_HUMAN/tr|H0Y8S0|H0Y8S0_HUMAN/tr|B7Z4V2|B7Z4V2_HUMAN/tr|B7Z4T3|B7Z4T3_HUMAN/tr|V9HW84|V9HW84_HUMAN		4.32	1		0	2	MASCOT		T
	R20180100087_1,22538	R.EQQIVIQSSGGLSKDDIENMVK.N	2418.22	-0.00046	2	1	25.67	0	1.09	0|0	sp|P38646|GRP75_HUMAN/tr|Q8N1C8|Q8N1C8_HUMAN/tr|H0Y8S0|H0Y8S0_HUMAN/tr|B7Z4V2|B7Z4V2_HUMAN/tr|B7Z4T3|B7Z4T3_HUMAN/tr|V9HW84|V9HW84_HUMAN		4.32	1		0	2	MASCOT		T
	R20180100087_1,6874	R.ETGVDLTK.D	862.452	-0.00066	2	1	58.44	0	0.000135	0|0	sp|P38646|GRP75_HUMAN/tr|Q8N1C8|Q8N1C8_HUMAN/tr|B7Z1V7|B7Z1V7_HUMAN/tr|B7Z4V2|B7Z4V2_HUMAN/tr|B7Z4T3|B7Z4T3_HUMAN/tr|V9HW84|V9HW84_HUMAN/tr|Q2F839|Q2F839_HUMAN		4.37	0		0	2	MASCOT		T
	R20180100087_1,3125	R.KDSETGENIR.Q	1148.55	0.00141	3	1	20.74	0	0.54	0|0	sp|P38646|GRP75_HUMAN/tr|Q8N1C8|Q8N1C8_HUMAN/tr|B7Z4V2|B7Z4V2_HUMAN/tr|B7Z4T3|B7Z4T3_HUMAN/tr|V9HW84|V9HW84_HUMAN		4.68	1		0	2	MASCOT		T
	R20180100087_1,8621	R.LVGMPAK.R	715.417	0.00037	2	1	50.31	0	0.00442	0|0	sp|P38646|GRP75_HUMAN/tr|Q8N1C8|Q8N1C8_HUMAN/tr|B7Z1V7|B7Z1V7_HUMAN/tr|D6RA73|D6RA73_HUMAN/tr|D6RJI2|D6RJI2_HUMAN/tr|B7Z4V2|B7Z4V2_HUMAN/tr|V9HW84|V9HW84_HUMAN		8.75	0		0	2	MASCOT		T
	R20180100087_1,8775	R.LVGMPAK.R	715.417	0.001	1	1	43.61	0	0.0186	0|0	sp|P38646|GRP75_HUMAN/tr|Q8N1C8|Q8N1C8_HUMAN/tr|B7Z1V7|B7Z1V7_HUMAN/tr|D6RA73|D6RA73_HUMAN/tr|D6RJI2|D6RJI2_HUMAN/tr|B7Z4V2|B7Z4V2_HUMAN/tr|V9HW84|V9HW84_HUMAN		8.75	0		0	2	MASCOT		T
	R20180100087_1,16951	R.TTPSVVAFTADGER.L	1450.72	0.00094	2	1	62.99	0	4.32e-05	0|0	sp|P38646|GRP75_HUMAN/tr|Q8N1C8|Q8N1C8_HUMAN/tr|B7Z1V7|B7Z1V7_HUMAN/tr|D6RA73|D6RA73_HUMAN/tr|D6RJI2|D6RJI2_HUMAN/tr|B7Z4V2|B7Z4V2_HUMAN/tr|V9HW84|V9HW84_HUMAN		4.37	0		0	2	MASCOT		T
	R20180100087_1,17586	R.TTPSVVAFTADGER.L	1450.72	-0.00144	2	1	79.88	0	8.9e-07	0|0	sp|P38646|GRP75_HUMAN/tr|Q8N1C8|Q8N1C8_HUMAN/tr|B7Z1V7|B7Z1V7_HUMAN/tr|D6RA73|D6RA73_HUMAN/tr|D6RJI2|D6RJI2_HUMAN/tr|B7Z4V2|B7Z4V2_HUMAN/tr|V9HW84|V9HW84_HUMAN		4.37	0		0	2	MASCOT		T
	R20180100087_1,18669	R.VEAVNM*AEGIIHDTETK.M	1872.9	0.00273	3	1	33.75	0	0.0361	0|0	sp|P38646|GRP75_HUMAN/tr|A1XP52|A1XP52_HUMAN/tr|Q8N1C8|Q8N1C8_HUMAN/tr|B7Z4V2|B7Z4V2_HUMAN/tr|B7Z4T3|B7Z4T3_HUMAN/tr|V9HW84|V9HW84_HUMAN		4.4	0	15.994919 Oxidation (M)	0	2	MASCOT		T
	R20180100087_1,25029	R.VEAVNMAEGIIHDTETK.M	1856.91	0.01691	2	1	83.7	0	2.82e-07	0|0	sp|P38646|GRP75_HUMAN/tr|A1XP52|A1XP52_HUMAN/tr|Q8N1C8|Q8N1C8_HUMAN/tr|B7Z4V2|B7Z4V2_HUMAN/tr|B7Z4T3|B7Z4T3_HUMAN/tr|V9HW84|V9HW84_HUMAN		4.4	0		0	2	MASCOT		T
	R20180100087_1,25129	R.VEAVNMAEGIIHDTETK.M	1856.91	-0.00315	3	1	87.33	0	1.51e-07	0|0	sp|P38646|GRP75_HUMAN/tr|A1XP52|A1XP52_HUMAN/tr|Q8N1C8|Q8N1C8_HUMAN/tr|B7Z4V2|B7Z4V2_HUMAN/tr|B7Z4T3|B7Z4T3_HUMAN/tr|V9HW84|V9HW84_HUMAN		4.4	0		0	2	MASCOT		T
	R20180100087_1,23803	R.VINEPTAAALAYGLDK.S	1645.88	-0.00262	3	1	87.21	0	3.77e-07	0|0	sp|P38646|GRP75_HUMAN/tr|Q8N1C8|Q8N1C8_HUMAN/tr|B7Z1V7|B7Z1V7_HUMAN/tr|B7Z4V2|B7Z4V2_HUMAN/tr|V9HW84|V9HW84_HUMAN/tr|Q2F839|Q2F839_HUMAN		4.37	0		0	2	MASCOT		T
	R20180100087_1,23808	R.VINEPTAAALAYGLDK.S	1645.88	0.00132	2	1	95.17	0	2.5e-08	0|0	sp|P38646|GRP75_HUMAN/tr|Q8N1C8|Q8N1C8_HUMAN/tr|B7Z1V7|B7Z1V7_HUMAN/tr|B7Z4V2|B7Z4V2_HUMAN/tr|V9HW84|V9HW84_HUMAN/tr|Q2F839|Q2F839_HUMAN		4.37	0		0	2	MASCOT		T
	R20180100087_1,5576	R.YDDPEVQK.D	993.452	0.00098	2	1	26.31	0	0.0976	0|0	sp|P38646|GRP75_HUMAN/tr|Q8N1C8|Q8N1C8_HUMAN/tr|B7Z1V7|B7Z1V7_HUMAN/tr|D6RJI2|D6RJI2_HUMAN/tr|B7Z4V2|B7Z4V2_HUMAN/tr|V9HW84|V9HW84_HUMAN		4.03	0		0	2	MASCOT		T
$9-1	sp|O75369|FLNB_HUMAN Filamin-B OS=Homo sapiens GN=FLNB PE=1 SV=2	35	32	0.1795	278161	5.47
$9-2	tr|A0A024R321|A0A024R321_HUMAN Filamin B, beta (Actin binding protein 278), isoform CRA_a OS=Homo sapiens GN=FLNB PE=4 SV=1	35	32	0.1781	280486	5.62
	R20180100087_1,3967	K.AEGPGLSK.A	758.404	0.00096	2	1	21.09	0	0.44	0|0	sp|O75369|FLNB_HUMAN/tr|A0A024R321|A0A024R321_HUMAN/tr|Q68CT4|Q68CT4_HUMAN/tr|E7EN95|E7EN95_HUMAN		6.05	0		0	2	MASCOT		T
	R20180100087_1,23993	K.APLNVQFNSPLPGDAVK.D	1766.94	-0.00061	2	1	70.98	0	5.51e-06	0|0	sp|O75369|FLNB_HUMAN/tr|A0A024R321|A0A024R321_HUMAN/tr|Q68CT4|Q68CT4_HUMAN/tr|E7EN95|E7EN95_HUMAN		5.88	0		0	2	MASCOT		T
	R20180100087_1,16994	K.DGTYAVTYIPDK.T	1342.65	0.00214	2	1	64.92	0	1.93e-05	0|0	sp|O75369|FLNB_HUMAN/tr|A0A024R321|A0A024R321_HUMAN/tr|Q68CT4|Q68CT4_HUMAN/tr|E7EN95|E7EN95_HUMAN		4.21	0		0	2	MASCOT		T
	R20180100087_1,17620	K.FADEHVPGSPFTVK.I ! -.FADEHVPGSPFTVK.I	1530.76	0.00129	3	1	20.57	0	0.57	0|0	sp|O75369|FLNB_HUMAN/tr|A0A024R321|A0A024R321_HUMAN/tr|Q68CT4|Q68CT4_HUMAN/tr|E7EN95|E7EN95_HUMAN ! tr|A0A0C4DGA1|A0A0C4DGA1_HUMAN		5.32	0		0	2	MASCOT		T
	R20180100087_1,26158	K.FNDEHIPESPYLVPVIAPSDDAR.R	2581.26	-0.00283	2	1	24.88	0	0.208	0|0	sp|O75369|FLNB_HUMAN/tr|A0A024R321|A0A024R321_HUMAN/tr|Q68CT4|Q68CT4_HUMAN/tr|E7EN95|E7EN95_HUMAN		4.1	0		0	2	MASCOT		T
	R20180100087_1,17223	K.GAGTGGLGLTVEGPCEAK.I	1673.82	0.0036	2	1	40.64	0	0.0176	0|0	sp|Q14315|FLNC_HUMAN/sp|O75369|FLNB_HUMAN/tr|A0A024R321|A0A024R321_HUMAN/tr|Q68CT4|Q68CT4_HUMAN/tr|E7EN95|E7EN95_HUMAN		4.53	0		0	2	MASCOT		T
	R20180100087_1,26756	K.GLHVVEVTYDDVPIPNSPFK.V	2226.14	-0.00239	2	1	39.33	0	0.0215	0|0	sp|O75369|FLNB_HUMAN/tr|A0A024R321|A0A024R321_HUMAN/tr|Q68CT4|Q68CT4_HUMAN/tr|E7EN95|E7EN95_HUMAN		4.54	0		0	2	MASCOT		T
	R20180100087_1,7625	K.IEYNDQNDGSCDVK.Y	1656.68	0.00328	2	1	85.58	0	2.84e-08	0|0	sp|O75369|FLNB_HUMAN/tr|A0A024R321|A0A024R321_HUMAN/tr|Q68CT4|Q68CT4_HUMAN/tr|E7EN95|E7EN95_HUMAN		3.84	0		0	2	MASCOT		T
	R20180100087_1,15777	K.IPEINSSDMSAHVTSPSGR.V	1984.94	0.00531	3	1	71.26	0	4e-06	0|0	sp|O75369|FLNB_HUMAN/tr|A0A024R321|A0A024R321_HUMAN/tr|Q68CT4|Q68CT4_HUMAN/tr|E7EN95|E7EN95_HUMAN		5.32	0		0	2	MASCOT		T
	R20180100087_1,20084	K.LDVTILSPSR.K	1100.63	0.00027	2	1	42.72	0	0.00481	0|0	sp|O75369|FLNB_HUMAN/tr|A0A024R321|A0A024R321_HUMAN/tr|Q68CT4|Q68CT4_HUMAN/tr|E7EN95|E7EN95_HUMAN		5.84	0		0	2	MASCOT		T
	R20180100087_1,32492	K.LGSAADFLLDISETDLSSLTASIK.A	2467.28	-0.01955	2	1	41.55	0	0.00419	0|0	sp|O75369|FLNB_HUMAN/tr|A0A024R321|A0A024R321_HUMAN/tr|Q68CT4|Q68CT4_HUMAN/tr|E7EN95|E7EN95_HUMAN		3.84	0		0	2	MASCOT		T
	R20180100087_1,7585	K.MDCQETPEGYK.V	1357.54	-0.00126	2	1	48.44	0	0.000264	0|0	sp|O75369|FLNB_HUMAN/tr|A0A024R321|A0A024R321_HUMAN/tr|Q68CT4|Q68CT4_HUMAN/tr|E7EN95|E7EN95_HUMAN		4.14	0		0	2	MASCOT		T
	R20180100087_1,8329	K.TATPEIVDNK.D	1087.56	-0.00135	2	1	34.58	0	0.0781	0|0	sp|O75369|FLNB_HUMAN/tr|A0A024R321|A0A024R321_HUMAN/tr|Q68CT4|Q68CT4_HUMAN/tr|E7EN95|E7EN95_HUMAN		4.37	0		0	2	MASCOT		T
	R20180100087_1,13989	K.VDIQTEDLEDGTCK.V	1622.72	0.00249	2	1	86.33	0	8.11e-08	0|0	sp|O75369|FLNB_HUMAN/tr|A0A024R321|A0A024R321_HUMAN/tr|Q68CT4|Q68CT4_HUMAN/tr|E7EN95|E7EN95_HUMAN/tr|H7C5L4|H7C5L4_HUMAN		3.77	0		0	2	MASCOT		T
	R20180100087_1,26405	K.VLFASQEIPASPFR.V	1561.84	-0.00757	2	1	65.48	0	2.25e-05	0|0	sp|O75369|FLNB_HUMAN/tr|A0A024R321|A0A024R321_HUMAN/tr|Q68CT4|Q68CT4_HUMAN/tr|E7EN95|E7EN95_HUMAN		5.97	0		0	2	MASCOT		T
	R20180100087_1,9566	K.VLPTYDASK.V	993.525	-2e-05	2	1	42.03	0	0.00603	0|0	sp|O75369|FLNB_HUMAN/tr|A0A024R321|A0A024R321_HUMAN/tr|Q68CT4|Q68CT4_HUMAN/tr|E7EN95|E7EN95_HUMAN		5.81	0		0	2	MASCOT		T
	R20180100087_1,28557	K.VTASGPGLSSYGVPASLPVDFAIDAR.D	2547.31	-0.00137	2	1	87.29	0	1.76e-07	0|0	sp|O75369|FLNB_HUMAN/tr|A0A024R321|A0A024R321_HUMAN/tr|Q68CT4|Q68CT4_HUMAN/tr|E7EN95|E7EN95_HUMAN		4.21	0		0	2	MASCOT		T
	R20180100087_1,18704	K.VVPCLVTPVTGR.E	1297.73	0.00256	2	1	24.72	0	0.157	0|0	sp|O75369|FLNB_HUMAN/tr|A0A024R321|A0A024R321_HUMAN/tr|Q68CT4|Q68CT4_HUMAN/tr|E7EN95|E7EN95_HUMAN		8.22	0		0	2	MASCOT		T
	R20180100087_1,16950	R.AGPGTLSVTIEGPSK.V	1413.76	0.00167	2	1	59.31	0	0.000272	0|0	sp|O75369|FLNB_HUMAN/tr|A0A024R321|A0A024R321_HUMAN/tr|Q68CT4|Q68CT4_HUMAN/tr|E7EN95|E7EN95_HUMAN		6.05	0		0	2	MASCOT		T
	R20180100087_1,23190	R.APSVATVGSICDLNLK.I	1644.86	-0.00119	2	1	34.12	0	0.0684	0|0	sp|O75369|FLNB_HUMAN/tr|A0A024R321|A0A024R321_HUMAN/tr|Q68CT4|Q68CT4_HUMAN/tr|E7EN95|E7EN95_HUMAN/tr|A0A0C4DGA1|A0A0C4DGA1_HUMAN		5.87	0		0	2	MASCOT		T
	R20180100087_1,16356	R.EAGAGGLSIAVEGPSK.A	1442.75	1e-05	2	1	82.92	0	4.41e-07	0|0	sp|Q14315|FLNC_HUMAN/sp|O75369|FLNB_HUMAN/tr|A0A024R321|A0A024R321_HUMAN/tr|Q68CT4|Q68CT4_HUMAN/tr|E7EN95|E7EN95_HUMAN/tr|Q59H94|Q59H94_HUMAN		4.53	0		0	2	MASCOT		T
	R20180100087_1,12218	R.FIPHENGVHTIDVK.F	1605.84	-0.00217	3	1	20.2	0	0.823	0|0	sp|O75369|FLNB_HUMAN/tr|A0A024R321|A0A024R321_HUMAN/tr|Q68CT4|Q68CT4_HUMAN/tr|E7EN95|E7EN95_HUMAN		5.99	0		0	2	MASCOT		T
	R20180100087_1,12242	R.FIPHENGVHTIDVK.F	1605.84	-0.00575	2	1	24.2	0	1.05	0|0	sp|O75369|FLNB_HUMAN/tr|A0A024R321|A0A024R321_HUMAN/tr|Q68CT4|Q68CT4_HUMAN/tr|E7EN95|E7EN95_HUMAN		5.99	0		0	2	MASCOT		T
	R20180100087_1,15736	R.FVPQEMGVHTVSVK.Y	1557.81	-4e-05	3	1	33.45	0	0.0465	0|0	sp|O75369|FLNB_HUMAN/tr|A0A024R321|A0A024R321_HUMAN/tr|Q68CT4|Q68CT4_HUMAN/tr|E7EN95|E7EN95_HUMAN/tr|H7C5L4|H7C5L4_HUMAN		6.75	0		0	2	MASCOT		T
	R20180100087_1,15748	R.FVPQEMGVHTVSVK.Y	1557.81	-0.00312	2	1	53.29	0	0.00117	0|0	sp|O75369|FLNB_HUMAN/tr|A0A024R321|A0A024R321_HUMAN/tr|Q68CT4|Q68CT4_HUMAN/tr|E7EN95|E7EN95_HUMAN/tr|H7C5L4|H7C5L4_HUMAN		6.75	0		0	2	MASCOT		T
	R20180100087_1,22404	R.GQHVTGSPFQFTVGPLGEGGAHK.V	2308.15	0.00992	3	1	61.09	0	0.000109	0|0	sp|O75369|FLNB_HUMAN/tr|A0A024R321|A0A024R321_HUMAN/tr|Q68CT4|Q68CT4_HUMAN/tr|E7EN95|E7EN95_HUMAN/tr|H7C5L4|H7C5L4_HUMAN		6.92	0		0	2	MASCOT		T
	R20180100087_1,20829	R.IGNLQTDLSDGLR.L	1401.73	-0.0011	2	1	59	0	0.000313	0|0	sp|O75369|FLNB_HUMAN/tr|A0A024R321|A0A024R321_HUMAN		4.21	0		0	2	MASCOT		T
	R20180100087_1,29597	R.LIALLEVLSQK.R ! R.LIALLEVLSQK.K	1226.77	0.00063	2	1	62.79	0	1.03e-05	0|0	sp|Q14315|FLNC_HUMAN/sp|O75369|FLNB_HUMAN/tr|A0A024R321|A0A024R321_HUMAN ! sp|P21333|FLNA_HUMAN/tr|A0A087WWY3|A0A087WWY3_HUMAN/tr|Q60FE5|Q60FE5_HUMAN/tr|Q5HY54|Q5HY54_HUMAN/tr|F8WE98|F8WE98_HUMAN/tr|A6NDY9|A6NDY9_HUMAN/tr|Q60FE6|Q60FE6_HUMAN		6	0		0	2	MASCOT		T
	R20180100087_1,13394	R.MDGTYACSYTPVK.A	1492.64	0.00516	2	1	75.11	0	4.72e-07	0|0	sp|O75369|FLNB_HUMAN/tr|A0A024R321|A0A024R321_HUMAN/tr|Q68CT4|Q68CT4_HUMAN/tr|E7EN95|E7EN95_HUMAN		5.58	0		0	2	MASCOT		T
	R20180100087_1,27149	R.TFEMSDFIVDTR.D	1460.67	-8e-05	2	1	59.44	0	4.78e-05	0|0	sp|O75369|FLNB_HUMAN/tr|A0A024R321|A0A024R321_HUMAN/tr|Q68CT4|Q68CT4_HUMAN/tr|E7EN95|E7EN95_HUMAN		4.03	0		0	2	MASCOT		T
	R20180100087_1,12699	R.VEVGKDQEFTVDTR.G	1622.8	0.00154	2	1	69.37	0	3.27e-05	0|0	sp|O75369|FLNB_HUMAN/tr|A0A024R321|A0A024R321_HUMAN/tr|Q68CT4|Q68CT4_HUMAN/tr|E7EN95|E7EN95_HUMAN		4.32	1		0	2	MASCOT		T
	R20180100087_1,12702	R.VEVGKDQEFTVDTR.G	1622.8	0.00611	3	1	35.46	0	0.0786	0|0	sp|O75369|FLNB_HUMAN/tr|A0A024R321|A0A024R321_HUMAN/tr|Q68CT4|Q68CT4_HUMAN/tr|E7EN95|E7EN95_HUMAN		4.32	1		0	2	MASCOT		T
	R20180100087_1,2981	R.VKVDPSHDASK.V	1182.61	0.00106	3	1	20.31	0	0.626	0|0	sp|O75369|FLNB_HUMAN/tr|A0A024R321|A0A024R321_HUMAN/tr|Q68CT4|Q68CT4_HUMAN/tr|E7EN95|E7EN95_HUMAN		6.72	1		0	2	MASCOT		T
	R20180100087_1,5250	R.VQAQGPGLK.E	897.515	-0.00024	2	1	20.01	0	0.3	0|0	sp|O75369|FLNB_HUMAN/tr|A0A024R321|A0A024R321_HUMAN/tr|Q68CT4|Q68CT4_HUMAN/tr|E7EN95|E7EN95_HUMAN		8.72	0		0	2	MASCOT		T
	R20180100087_1,15110	R.VTEAEIVPMGK.N	1173.62	-0.00221	2	1	50.86	0	0.0015	0|0	sp|O75369|FLNB_HUMAN/tr|A0A024R321|A0A024R321_HUMAN/tr|Q68CT4|Q68CT4_HUMAN/tr|E7EN95|E7EN95_HUMAN/tr|H7C5L4|H7C5L4_HUMAN		4.53	0		0	2	MASCOT		T
$10-1	tr|F6KPG5|F6KPG5_HUMAN Albumin (Fragment) OS=Homo sapiens PE=2 SV=1	72	31	0.5795	66530.6	5.73
$10-2	sp|P02768|ALBU_HUMAN Serum albumin OS=Homo sapiens GN=ALB PE=1 SV=2	72	31	0.5567	69366	5.92
	R20180100087_1,7712	K.AAFTECCQAADK.A	1371.57	-0.00121	2	1	62.13	0	5.6e-06	0|0	sp|P02768|ALBU_HUMAN/tr|A0A0C4DGB6|A0A0C4DGB6_HUMAN/tr|B4DPP6|B4DPP6_HUMAN/tr|D6RHD5|D6RHD5_HUMAN/tr|Q56G89|Q56G89_HUMAN/tr|B7WNR0|B7WNR0_HUMAN/tr|H0YA55|H0YA55_HUMAN/tr|B2RBS8|B2RBS8_HUMAN/tr|A8K9P0|A8K9P0_HUMAN/tr|B4DPR2|B4DPR2_HUMAN/tr|F6KPG5|F6KPG5_HUMAN		4.37	0		0	2	MASCOT		T
	R20180100087_1,5069	K.ADDKETCFAEEGKK.L	1627.73	-0.00032	2	1	44.71	0	0.00683	0|0	sp|P02768|ALBU_HUMAN/tr|B4DPP6|B4DPP6_HUMAN/tr|C9JKR2|C9JKR2_HUMAN/tr|D6RHD5|D6RHD5_HUMAN/tr|Q56G89|Q56G89_HUMAN/tr|B7WNR0|B7WNR0_HUMAN/tr|H0YA55|H0YA55_HUMAN/tr|B2RBS8|B2RBS8_HUMAN/tr|A8K9P0|A8K9P0_HUMAN/tr|B4DPR2|B4DPR2_HUMAN/tr|F6KPG5|F6KPG5_HUMAN/tr|A0A087WWT3|A0A087WWT3_HUMAN		4.51	2		0	2	MASCOT		T
	R20180100087_1,5181	K.CCAAADPHECYAK.V	1552.6	-0.00059	2	1	52.84	0	3.38e-05	0|0	sp|P02768|ALBU_HUMAN/tr|A0A0C4DGB6|A0A0C4DGB6_HUMAN/tr|B4DPP6|B4DPP6_HUMAN/tr|C9JKR2|C9JKR2_HUMAN/tr|D6RHD5|D6RHD5_HUMAN/tr|Q56G89|Q56G89_HUMAN/tr|B7WNR0|B7WNR0_HUMAN/tr|H0YA55|H0YA55_HUMAN/tr|B2RBS8|B2RBS8_HUMAN/tr|A8K9P0|A8K9P0_HUMAN/tr|B4DPR2|B4DPR2_HUMAN/tr|F6KPG5|F6KPG5_HUMAN/tr|A0A087WWT3|A0A087WWT3_HUMAN		5.32	0		0	2	MASCOT		T
	R20180100087_1,7626	K.CCTESLVNR.R	1138.5	-0.00125	2	1	39.07	0	0.00283	0|0	sp|P02768|ALBU_HUMAN/tr|A0A0C4DGB6|A0A0C4DGB6_HUMAN/tr|B4DPP6|B4DPP6_HUMAN/tr|C9JKR2|C9JKR2_HUMAN/tr|D6RHD5|D6RHD5_HUMAN/tr|B7WNR0|B7WNR0_HUMAN/tr|H0YA55|H0YA55_HUMAN/tr|B2RBS8|B2RBS8_HUMAN/tr|A8K9P0|A8K9P0_HUMAN/tr|B4DPR2|B4DPR2_HUMAN/tr|F6KPG5|F6KPG5_HUMAN/tr|A0A087WWT3|A0A087WWT3_HUMAN		5.99	0		0	2	MASCOT		T
	R20180100087_1,29664	K.DVFLGM*FLYEYAR.R	1639.78	0.0023	2	1	88.85	0	8.18e-08	0|0	sp|P02768|ALBU_HUMAN/tr|A0A0C4DGB6|A0A0C4DGB6_HUMAN/tr|B4DPP6|B4DPP6_HUMAN/tr|C9JKR2|C9JKR2_HUMAN/tr|D6RHD5|D6RHD5_HUMAN/tr|Q56G89|Q56G89_HUMAN/tr|B7WNR0|B7WNR0_HUMAN/tr|H0YA55|H0YA55_HUMAN/tr|A8K9P0|A8K9P0_HUMAN/tr|B4DPR2|B4DPR2_HUMAN/tr|F6KPG5|F6KPG5_HUMAN		4.37	0	15.994919 Oxidation (M)	0	2	MASCOT		T
	R20180100087_1,26277	K.EFNAETFTFHADICTLSEK.E	2260.02	0.00089	2	1	92.83	0	1.54e-08	0|0	sp|P02768|ALBU_HUMAN/tr|A0A0C4DGB6|A0A0C4DGB6_HUMAN/tr|B4DPP6|B4DPP6_HUMAN/tr|C9JKR2|C9JKR2_HUMAN/tr|D6RHD5|D6RHD5_HUMAN/tr|Q56G89|Q56G89_HUMAN/tr|B7WNR0|B7WNR0_HUMAN/tr|H0YA55|H0YA55_HUMAN/tr|B2RBS8|B2RBS8_HUMAN/tr|A8K9P0|A8K9P0_HUMAN/tr|B4DPR2|B4DPR2_HUMAN/tr|F6KPG5|F6KPG5_HUMAN/tr|A0A087WWT3|A0A087WWT3_HUMAN		4.4	0		0	2	MASCOT		T
	R20180100087_1,26297	K.EFNAETFTFHADICTLSEK.E	2260.02	-0.00019	3	1	54.26	0	0.000113	0|0	sp|P02768|ALBU_HUMAN/tr|A0A0C4DGB6|A0A0C4DGB6_HUMAN/tr|B4DPP6|B4DPP6_HUMAN/tr|C9JKR2|C9JKR2_HUMAN/tr|D6RHD5|D6RHD5_HUMAN/tr|Q56G89|Q56G89_HUMAN/tr|B7WNR0|B7WNR0_HUMAN/tr|H0YA55|H0YA55_HUMAN/tr|B2RBS8|B2RBS8_HUMAN/tr|A8K9P0|A8K9P0_HUMAN/tr|B4DPR2|B4DPR2_HUMAN/tr|F6KPG5|F6KPG5_HUMAN/tr|A0A087WWT3|A0A087WWT3_HUMAN		4.4	0		0	2	MASCOT		T
	R20180100087_1,26943	K.EFNAETFTFHADICTLSEK.E	2260.02	0.00115	2	1	112.83	0	1.53e-10	0|0	sp|P02768|ALBU_HUMAN/tr|A0A0C4DGB6|A0A0C4DGB6_HUMAN/tr|B4DPP6|B4DPP6_HUMAN/tr|C9JKR2|C9JKR2_HUMAN/tr|D6RHD5|D6RHD5_HUMAN/tr|Q56G89|Q56G89_HUMAN/tr|B7WNR0|B7WNR0_HUMAN/tr|H0YA55|H0YA55_HUMAN/tr|B2RBS8|B2RBS8_HUMAN/tr|A8K9P0|A8K9P0_HUMAN/tr|B4DPR2|B4DPR2_HUMAN/tr|F6KPG5|F6KPG5_HUMAN/tr|A0A087WWT3|A0A087WWT3_HUMAN		4.4	0		0	2	MASCOT		T
	R20180100087_1,26964	K.EFNAETFTFHADICTLSEK.E	2260.02	-0.00157	3	1	50.16	0	0.00028	0|0	sp|P02768|ALBU_HUMAN/tr|A0A0C4DGB6|A0A0C4DGB6_HUMAN/tr|B4DPP6|B4DPP6_HUMAN/tr|C9JKR2|C9JKR2_HUMAN/tr|D6RHD5|D6RHD5_HUMAN/tr|Q56G89|Q56G89_HUMAN/tr|B7WNR0|B7WNR0_HUMAN/tr|H0YA55|H0YA55_HUMAN/tr|B2RBS8|B2RBS8_HUMAN/tr|A8K9P0|A8K9P0_HUMAN/tr|B4DPR2|B4DPR2_HUMAN/tr|F6KPG5|F6KPG5_HUMAN/tr|A0A087WWT3|A0A087WWT3_HUMAN		4.4	0		0	2	MASCOT		T
	R20180100087_1,27769	K.EFNAETFTFHADICTLSEK.E	2260.02	-0.00154	3	1	40.29	0	0.00272	0|0	sp|P02768|ALBU_HUMAN/tr|A0A0C4DGB6|A0A0C4DGB6_HUMAN/tr|B4DPP6|B4DPP6_HUMAN/tr|C9JKR2|C9JKR2_HUMAN/tr|D6RHD5|D6RHD5_HUMAN/tr|Q56G89|Q56G89_HUMAN/tr|B7WNR0|B7WNR0_HUMAN/tr|H0YA55|H0YA55_HUMAN/tr|B2RBS8|B2RBS8_HUMAN/tr|A8K9P0|A8K9P0_HUMAN/tr|B4DPR2|B4DPR2_HUMAN/tr|F6KPG5|F6KPG5_HUMAN/tr|A0A087WWT3|A0A087WWT3_HUMAN		4.4	0		0	2	MASCOT		T
	R20180100087_1,28248	K.EFNAETFTFHADICTLSEK.E	2260.02	-0.00203	2	1	98.26	0	4.4e-09	0|0	sp|P02768|ALBU_HUMAN/tr|A0A0C4DGB6|A0A0C4DGB6_HUMAN/tr|B4DPP6|B4DPP6_HUMAN/tr|C9JKR2|C9JKR2_HUMAN/tr|D6RHD5|D6RHD5_HUMAN/tr|Q56G89|Q56G89_HUMAN/tr|B7WNR0|B7WNR0_HUMAN/tr|H0YA55|H0YA55_HUMAN/tr|B2RBS8|B2RBS8_HUMAN/tr|A8K9P0|A8K9P0_HUMAN/tr|B4DPR2|B4DPR2_HUMAN/tr|F6KPG5|F6KPG5_HUMAN/tr|A0A087WWT3|A0A087WWT3_HUMAN		4.4	0		0	2	MASCOT		T
	R20180100087_1,28437	K.EFNAETFTFHADICTLSEK.E	2260.02	-0.00085	3	1	69.1	0	3.68e-06	0|0	sp|P02768|ALBU_HUMAN/tr|A0A0C4DGB6|A0A0C4DGB6_HUMAN/tr|B4DPP6|B4DPP6_HUMAN/tr|C9JKR2|C9JKR2_HUMAN/tr|D6RHD5|D6RHD5_HUMAN/tr|Q56G89|Q56G89_HUMAN/tr|B7WNR0|B7WNR0_HUMAN/tr|H0YA55|H0YA55_HUMAN/tr|B2RBS8|B2RBS8_HUMAN/tr|A8K9P0|A8K9P0_HUMAN/tr|B4DPR2|B4DPR2_HUMAN/tr|F6KPG5|F6KPG5_HUMAN/tr|A0A087WWT3|A0A087WWT3_HUMAN		4.4	0		0	2	MASCOT		T
	R20180100087_1,29088	K.EFNAETFTFHADICTLSEK.E	2260.02	-0.00031	3	1	33.17	0	0.0145	0|0	sp|P02768|ALBU_HUMAN/tr|A0A0C4DGB6|A0A0C4DGB6_HUMAN/tr|B4DPP6|B4DPP6_HUMAN/tr|C9JKR2|C9JKR2_HUMAN/tr|D6RHD5|D6RHD5_HUMAN/tr|Q56G89|Q56G89_HUMAN/tr|B7WNR0|B7WNR0_HUMAN/tr|H0YA55|H0YA55_HUMAN/tr|B2RBS8|B2RBS8_HUMAN/tr|A8K9P0|A8K9P0_HUMAN/tr|B4DPR2|B4DPR2_HUMAN/tr|F6KPG5|F6KPG5_HUMAN/tr|A0A087WWT3|A0A087WWT3_HUMAN		4.4	0		0	2	MASCOT		T
	R20180100087_1,29550	K.EFNAETFTFHADICTLSEK.E	2260.02	0.00115	2	1	82.42	0	1.68e-07	0|0	sp|P02768|ALBU_HUMAN/tr|A0A0C4DGB6|A0A0C4DGB6_HUMAN/tr|B4DPP6|B4DPP6_HUMAN/tr|C9JKR2|C9JKR2_HUMAN/tr|D6RHD5|D6RHD5_HUMAN/tr|Q56G89|Q56G89_HUMAN/tr|B7WNR0|B7WNR0_HUMAN/tr|H0YA55|H0YA55_HUMAN/tr|B2RBS8|B2RBS8_HUMAN/tr|A8K9P0|A8K9P0_HUMAN/tr|B4DPR2|B4DPR2_HUMAN/tr|F6KPG5|F6KPG5_HUMAN/tr|A0A087WWT3|A0A087WWT3_HUMAN		4.4	0		0	2	MASCOT		T
	R20180100087_1,29742	K.EFNAETFTFHADICTLSEK.E	2260.02	-0.00073	3	1	44.88	0	0.000977	0|0	sp|P02768|ALBU_HUMAN/tr|A0A0C4DGB6|A0A0C4DGB6_HUMAN/tr|B4DPP6|B4DPP6_HUMAN/tr|C9JKR2|C9JKR2_HUMAN/tr|D6RHD5|D6RHD5_HUMAN/tr|Q56G89|Q56G89_HUMAN/tr|B7WNR0|B7WNR0_HUMAN/tr|H0YA55|H0YA55_HUMAN/tr|B2RBS8|B2RBS8_HUMAN/tr|A8K9P0|A8K9P0_HUMAN/tr|B4DPR2|B4DPR2_HUMAN/tr|F6KPG5|F6KPG5_HUMAN/tr|A0A087WWT3|A0A087WWT3_HUMAN		4.4	0		0	2	MASCOT		T
	R20180100087_1,30246	K.EFNAETFTFHADICTLSEK.E	2260.02	-0.00199	2	1	94.21	0	1.12e-08	0|0	sp|P02768|ALBU_HUMAN/tr|A0A0C4DGB6|A0A0C4DGB6_HUMAN/tr|B4DPP6|B4DPP6_HUMAN/tr|C9JKR2|C9JKR2_HUMAN/tr|D6RHD5|D6RHD5_HUMAN/tr|Q56G89|Q56G89_HUMAN/tr|B7WNR0|B7WNR0_HUMAN/tr|H0YA55|H0YA55_HUMAN/tr|B2RBS8|B2RBS8_HUMAN/tr|A8K9P0|A8K9P0_HUMAN/tr|B4DPR2|B4DPR2_HUMAN/tr|F6KPG5|F6KPG5_HUMAN/tr|A0A087WWT3|A0A087WWT3_HUMAN		4.4	0		0	2	MASCOT		T
	R20180100087_1,30390	K.EFNAETFTFHADICTLSEK.E	2260.02	0.00035	3	1	47.27	0	0.00056	0|0	sp|P02768|ALBU_HUMAN/tr|A0A0C4DGB6|A0A0C4DGB6_HUMAN/tr|B4DPP6|B4DPP6_HUMAN/tr|C9JKR2|C9JKR2_HUMAN/tr|D6RHD5|D6RHD5_HUMAN/tr|Q56G89|Q56G89_HUMAN/tr|B7WNR0|B7WNR0_HUMAN/tr|H0YA55|H0YA55_HUMAN/tr|B2RBS8|B2RBS8_HUMAN/tr|A8K9P0|A8K9P0_HUMAN/tr|B4DPR2|B4DPR2_HUMAN/tr|F6KPG5|F6KPG5_HUMAN/tr|A0A087WWT3|A0A087WWT3_HUMAN		4.4	0		0	2	MASCOT		T
	R20180100087_1,30894	K.EFNAETFTFHADICTLSEK.E	2260.02	-0.00159	2	1	94.44	0	1.05e-08	0|0	sp|P02768|ALBU_HUMAN/tr|A0A0C4DGB6|A0A0C4DGB6_HUMAN/tr|B4DPP6|B4DPP6_HUMAN/tr|C9JKR2|C9JKR2_HUMAN/tr|D6RHD5|D6RHD5_HUMAN/tr|Q56G89|Q56G89_HUMAN/tr|B7WNR0|B7WNR0_HUMAN/tr|H0YA55|H0YA55_HUMAN/tr|B2RBS8|B2RBS8_HUMAN/tr|A8K9P0|A8K9P0_HUMAN/tr|B4DPR2|B4DPR2_HUMAN/tr|F6KPG5|F6KPG5_HUMAN/tr|A0A087WWT3|A0A087WWT3_HUMAN		4.4	0		0	2	MASCOT		T
	R20180100087_1,31020	K.EFNAETFTFHADICTLSEK.E	2260.02	-0.00163	3	1	53.89	0	0.000118	0|0	sp|P02768|ALBU_HUMAN/tr|A0A0C4DGB6|A0A0C4DGB6_HUMAN/tr|B4DPP6|B4DPP6_HUMAN/tr|C9JKR2|C9JKR2_HUMAN/tr|D6RHD5|D6RHD5_HUMAN/tr|Q56G89|Q56G89_HUMAN/tr|B7WNR0|B7WNR0_HUMAN/tr|H0YA55|H0YA55_HUMAN/tr|B2RBS8|B2RBS8_HUMAN/tr|A8K9P0|A8K9P0_HUMAN/tr|B4DPR2|B4DPR2_HUMAN/tr|F6KPG5|F6KPG5_HUMAN/tr|A0A087WWT3|A0A087WWT3_HUMAN		4.4	0		0	2	MASCOT		T
	R20180100087_1,31528	K.EFNAETFTFHADICTLSEK.E	2260.02	-0.00193	2	1	111.35	0	2.16e-10	0|0	sp|P02768|ALBU_HUMAN/tr|A0A0C4DGB6|A0A0C4DGB6_HUMAN/tr|B4DPP6|B4DPP6_HUMAN/tr|C9JKR2|C9JKR2_HUMAN/tr|D6RHD5|D6RHD5_HUMAN/tr|Q56G89|Q56G89_HUMAN/tr|B7WNR0|B7WNR0_HUMAN/tr|H0YA55|H0YA55_HUMAN/tr|B2RBS8|B2RBS8_HUMAN/tr|A8K9P0|A8K9P0_HUMAN/tr|B4DPR2|B4DPR2_HUMAN/tr|F6KPG5|F6KPG5_HUMAN/tr|A0A087WWT3|A0A087WWT3_HUMAN		4.4	0		0	2	MASCOT		T
	R20180100087_1,31654	K.EFNAETFTFHADICTLSEK.E	2260.02	-0.00211	3	1	60.1	0	2.88e-05	0|0	sp|P02768|ALBU_HUMAN/tr|A0A0C4DGB6|A0A0C4DGB6_HUMAN/tr|B4DPP6|B4DPP6_HUMAN/tr|C9JKR2|C9JKR2_HUMAN/tr|D6RHD5|D6RHD5_HUMAN/tr|Q56G89|Q56G89_HUMAN/tr|B7WNR0|B7WNR0_HUMAN/tr|H0YA55|H0YA55_HUMAN/tr|B2RBS8|B2RBS8_HUMAN/tr|A8K9P0|A8K9P0_HUMAN/tr|B4DPR2|B4DPR2_HUMAN/tr|F6KPG5|F6KPG5_HUMAN/tr|A0A087WWT3|A0A087WWT3_HUMAN		4.4	0		0	2	MASCOT		T
	R20180100087_1,32192	K.EFNAETFTFHADICTLSEK.E	2260.02	-0.00141	2	1	86.89	0	5.94e-08	0|0	sp|P02768|ALBU_HUMAN/tr|A0A0C4DGB6|A0A0C4DGB6_HUMAN/tr|B4DPP6|B4DPP6_HUMAN/tr|C9JKR2|C9JKR2_HUMAN/tr|D6RHD5|D6RHD5_HUMAN/tr|Q56G89|Q56G89_HUMAN/tr|B7WNR0|B7WNR0_HUMAN/tr|H0YA55|H0YA55_HUMAN/tr|B2RBS8|B2RBS8_HUMAN/tr|A8K9P0|A8K9P0_HUMAN/tr|B4DPR2|B4DPR2_HUMAN/tr|F6KPG5|F6KPG5_HUMAN/tr|A0A087WWT3|A0A087WWT3_HUMAN		4.4	0		0	2	MASCOT		T
	R20180100087_1,32277	K.EFNAETFTFHADICTLSEK.E	2260.02	-0.00034	3	1	63.04	0	1.49e-05	0|0	sp|P02768|ALBU_HUMAN/tr|A0A0C4DGB6|A0A0C4DGB6_HUMAN/tr|B4DPP6|B4DPP6_HUMAN/tr|C9JKR2|C9JKR2_HUMAN/tr|D6RHD5|D6RHD5_HUMAN/tr|Q56G89|Q56G89_HUMAN/tr|B7WNR0|B7WNR0_HUMAN/tr|H0YA55|H0YA55_HUMAN/tr|B2RBS8|B2RBS8_HUMAN/tr|A8K9P0|A8K9P0_HUMAN/tr|B4DPR2|B4DPR2_HUMAN/tr|F6KPG5|F6KPG5_HUMAN/tr|A0A087WWT3|A0A087WWT3_HUMAN		4.4	0		0	2	MASCOT		T
	R20180100087_1,32819	K.EFNAETFTFHADICTLSEK.E	2260.02	-0.00533	2	1	73.9	0	1.23e-06	0|0	sp|P02768|ALBU_HUMAN/tr|A0A0C4DGB6|A0A0C4DGB6_HUMAN/tr|B4DPP6|B4DPP6_HUMAN/tr|C9JKR2|C9JKR2_HUMAN/tr|D6RHD5|D6RHD5_HUMAN/tr|Q56G89|Q56G89_HUMAN/tr|B7WNR0|B7WNR0_HUMAN/tr|H0YA55|H0YA55_HUMAN/tr|B2RBS8|B2RBS8_HUMAN/tr|A8K9P0|A8K9P0_HUMAN/tr|B4DPR2|B4DPR2_HUMAN/tr|F6KPG5|F6KPG5_HUMAN/tr|A0A087WWT3|A0A087WWT3_HUMAN		4.4	0		0	2	MASCOT		T
	R20180100087_1,32916	K.EFNAETFTFHADICTLSEK.E	2260.02	-0.00061	3	1	55.71	0	8.07e-05	0|0	sp|P02768|ALBU_HUMAN/tr|A0A0C4DGB6|A0A0C4DGB6_HUMAN/tr|B4DPP6|B4DPP6_HUMAN/tr|C9JKR2|C9JKR2_HUMAN/tr|D6RHD5|D6RHD5_HUMAN/tr|Q56G89|Q56G89_HUMAN/tr|B7WNR0|B7WNR0_HUMAN/tr|H0YA55|H0YA55_HUMAN/tr|B2RBS8|B2RBS8_HUMAN/tr|A8K9P0|A8K9P0_HUMAN/tr|B4DPR2|B4DPR2_HUMAN/tr|F6KPG5|F6KPG5_HUMAN/tr|A0A087WWT3|A0A087WWT3_HUMAN		4.4	0		0	2	MASCOT		T
	R20180100087_1,33397	K.EFNAETFTFHADICTLSEK.E	2260.02	-0.00343	2	1	60.9	0	2.45e-05	0|0	sp|P02768|ALBU_HUMAN/tr|A0A0C4DGB6|A0A0C4DGB6_HUMAN/tr|B4DPP6|B4DPP6_HUMAN/tr|C9JKR2|C9JKR2_HUMAN/tr|D6RHD5|D6RHD5_HUMAN/tr|Q56G89|Q56G89_HUMAN/tr|B7WNR0|B7WNR0_HUMAN/tr|H0YA55|H0YA55_HUMAN/tr|B2RBS8|B2RBS8_HUMAN/tr|A8K9P0|A8K9P0_HUMAN/tr|B4DPR2|B4DPR2_HUMAN/tr|F6KPG5|F6KPG5_HUMAN/tr|A0A087WWT3|A0A087WWT3_HUMAN		4.4	0		0	2	MASCOT		T
	R20180100087_1,33458	K.EFNAETFTFHADICTLSEK.E	2260.02	0.00062	3	1	53.03	0	0.000149	0|0	sp|P02768|ALBU_HUMAN/tr|A0A0C4DGB6|A0A0C4DGB6_HUMAN/tr|B4DPP6|B4DPP6_HUMAN/tr|C9JKR2|C9JKR2_HUMAN/tr|D6RHD5|D6RHD5_HUMAN/tr|Q56G89|Q56G89_HUMAN/tr|B7WNR0|B7WNR0_HUMAN/tr|H0YA55|H0YA55_HUMAN/tr|B2RBS8|B2RBS8_HUMAN/tr|A8K9P0|A8K9P0_HUMAN/tr|B4DPR2|B4DPR2_HUMAN/tr|F6KPG5|F6KPG5_HUMAN/tr|A0A087WWT3|A0A087WWT3_HUMAN		4.4	0		0	2	MASCOT		T
	R20180100087_1,33895	K.EFNAETFTFHADICTLSEK.E	2260.02	-0.00153	2	1	65.24	0	8.69e-06	0|0	sp|P02768|ALBU_HUMAN/tr|A0A0C4DGB6|A0A0C4DGB6_HUMAN/tr|B4DPP6|B4DPP6_HUMAN/tr|C9JKR2|C9JKR2_HUMAN/tr|D6RHD5|D6RHD5_HUMAN/tr|Q56G89|Q56G89_HUMAN/tr|B7WNR0|B7WNR0_HUMAN/tr|H0YA55|H0YA55_HUMAN/tr|B2RBS8|B2RBS8_HUMAN/tr|A8K9P0|A8K9P0_HUMAN/tr|B4DPR2|B4DPR2_HUMAN/tr|F6KPG5|F6KPG5_HUMAN/tr|A0A087WWT3|A0A087WWT3_HUMAN		4.4	0		0	2	MASCOT		T
	R20180100087_1,33978	K.EFNAETFTFHADICTLSEK.E	2260.02	-0.00031	3	1	50.24	0	0.000284	0|0	sp|P02768|ALBU_HUMAN/tr|A0A0C4DGB6|A0A0C4DGB6_HUMAN/tr|B4DPP6|B4DPP6_HUMAN/tr|C9JKR2|C9JKR2_HUMAN/tr|D6RHD5|D6RHD5_HUMAN/tr|Q56G89|Q56G89_HUMAN/tr|B7WNR0|B7WNR0_HUMAN/tr|H0YA55|H0YA55_HUMAN/tr|B2RBS8|B2RBS8_HUMAN/tr|A8K9P0|A8K9P0_HUMAN/tr|B4DPR2|B4DPR2_HUMAN/tr|F6KPG5|F6KPG5_HUMAN/tr|A0A087WWT3|A0A087WWT3_HUMAN		4.4	0		0	2	MASCOT		T
	R20180100087_1,34483	K.EFNAETFTFHADICTLSEK.E	2260.02	-0.00118	3	1	57.09	0	5.67e-05	0|0	sp|P02768|ALBU_HUMAN/tr|A0A0C4DGB6|A0A0C4DGB6_HUMAN/tr|B4DPP6|B4DPP6_HUMAN/tr|C9JKR2|C9JKR2_HUMAN/tr|D6RHD5|D6RHD5_HUMAN/tr|Q56G89|Q56G89_HUMAN/tr|B7WNR0|B7WNR0_HUMAN/tr|H0YA55|H0YA55_HUMAN/tr|B2RBS8|B2RBS8_HUMAN/tr|A8K9P0|A8K9P0_HUMAN/tr|B4DPR2|B4DPR2_HUMAN/tr|F6KPG5|F6KPG5_HUMAN/tr|A0A087WWT3|A0A087WWT3_HUMAN		4.4	0		0	2	MASCOT		T
	R20180100087_1,25073	K.EFNAETFTFHADICTLSEKER.Q	2545.17	0.00293	3	1	62.42	0	2.25e-05	0|0	sp|P02768|ALBU_HUMAN/tr|A0A0C4DGB6|A0A0C4DGB6_HUMAN/tr|B4DPP6|B4DPP6_HUMAN/tr|C9JKR2|C9JKR2_HUMAN/tr|D6RHD5|D6RHD5_HUMAN/tr|Q56G89|Q56G89_HUMAN/tr|B7WNR0|B7WNR0_HUMAN/tr|H0YA55|H0YA55_HUMAN/tr|B2RBS8|B2RBS8_HUMAN/tr|A8K9P0|A8K9P0_HUMAN/tr|B4DPR2|B4DPR2_HUMAN/tr|F6KPG5|F6KPG5_HUMAN/tr|A0A087WWT3|A0A087WWT3_HUMAN		4.57	1		0	2	MASCOT		T
	R20180100087_1,5374	K.IDEIR.R ! K.IDELR.Q ! K.IDELR.T ! K.IDELR.L ! R.LDEIR.V ! K.LDELR.D ! R.LDELR.G ! K.LDELR.R ! R.LDELR.M	645.357	-0.00023	2	1	25.95	0	0.644	0|0	sp|Q8WXA9|SREK1_HUMAN/tr|Q69YM5|Q69YM5_HUMAN/tr|E5RJ76|E5RJ76_HUMAN/tr|B3KRJ9|B3KRJ9_HUMAN ! sp|Q96N23|CFA54_HUMAN/tr|A0A0A0MTQ3|A0A0A0MTQ3_HUMAN ! sp|Q96Q89|KI20B_HUMAN/tr|D3DR32|D3DR32_HUMAN ! sp|Q05519|SRS11_HUMAN/tr|Q6PJY9|Q6PJY9_HUMAN/tr|Q05BU6|Q05BU6_HUMAN/tr|Q5T760|Q5T760_HUMAN/tr|B4DTC1|B4DTC1_HUMAN/tr|S4R3C4|S4R3C4_HUMAN/tr|Q6PKC9|Q6PKC9_HUMAN/tr|B4DWT1|B4DWT1_HUMAN/tr|Q6PJB9|Q6PJB9_HUMA…		4.37	0		0	2	MASCOT		T
	R20180100087_1,9557	K.IDEIR.R ! K.IDELR.Q ! K.IDELR.T ! K.IDELR.L ! R.LDEIR.V ! K.LDELR.D ! R.LDELR.G ! K.LDELR.R ! R.LDELR.M	645.357	0.00067	2	1	20.36	0	2.87	0|0	sp|Q8WXA9|SREK1_HUMAN/tr|Q69YM5|Q69YM5_HUMAN/tr|E5RJ76|E5RJ76_HUMAN/tr|B3KRJ9|B3KRJ9_HUMAN ! sp|Q96N23|CFA54_HUMAN/tr|A0A0A0MTQ3|A0A0A0MTQ3_HUMAN ! sp|Q96Q89|KI20B_HUMAN/tr|D3DR32|D3DR32_HUMAN ! sp|Q05519|SRS11_HUMAN/tr|Q6PJY9|Q6PJY9_HUMAN/tr|Q05BU6|Q05BU6_HUMAN/tr|Q5T760|Q5T760_HUMAN/tr|B4DTC1|B4DTC1_HUMAN/tr|S4R3C4|S4R3C4_HUMAN/tr|Q6PKC9|Q6PKC9_HUMAN/tr|B4DWT1|B4DWT1_HUMAN/tr|Q6PJB9|Q6PJB9_HUMA…		4.37	0		0	2	MASCOT		T
	R20180100087_1,17013	K.KVPQVSTPTLVEVSR.N	1639.94	0.00032	3	1	59.24	0	3.38e-05	0|0	sp|P02768|ALBU_HUMAN/tr|A0A0C4DGB6|A0A0C4DGB6_HUMAN/tr|B4DPP6|B4DPP6_HUMAN/tr|C9JKR2|C9JKR2_HUMAN/tr|D6RHD5|D6RHD5_HUMAN/tr|Q56G89|Q56G89_HUMAN/tr|B7WNR0|B7WNR0_HUMAN/tr|H0YA55|H0YA55_HUMAN/tr|B2RBS8|B2RBS8_HUMAN/tr|A8K9P0|A8K9P0_HUMAN/tr|B4DPR2|B4DPR2_HUMAN/tr|F6KPG5|F6KPG5_HUMAN/tr|A0A087WWT3|A0A087WWT3_HUMAN		8.75	1		0	2	MASCOT		T
	R20180100087_1,17305	K.KVPQVSTPTLVEVSR.N	1639.94	0.00101	2	1	80.82	0	2.35e-07	0|0	sp|P02768|ALBU_HUMAN/tr|A0A0C4DGB6|A0A0C4DGB6_HUMAN/tr|B4DPP6|B4DPP6_HUMAN/tr|C9JKR2|C9JKR2_HUMAN/tr|D6RHD5|D6RHD5_HUMAN/tr|Q56G89|Q56G89_HUMAN/tr|B7WNR0|B7WNR0_HUMAN/tr|H0YA55|H0YA55_HUMAN/tr|B2RBS8|B2RBS8_HUMAN/tr|A8K9P0|A8K9P0_HUMAN/tr|B4DPR2|B4DPR2_HUMAN/tr|F6KPG5|F6KPG5_HUMAN/tr|A0A087WWT3|A0A087WWT3_HUMAN		8.75	1		0	2	MASCOT		T
	R20180100087_1,11602	K.LCTVATLR.E	933.519	0.00093	2	1	35.1	0	0.0253	0|0	sp|P02768|ALBU_HUMAN/tr|A0A0C4DGB6|A0A0C4DGB6_HUMAN/tr|B4DPP6|B4DPP6_HUMAN/tr|Q56G89|Q56G89_HUMAN/tr|B2RBS8|B2RBS8_HUMAN/tr|A8K9P0|A8K9P0_HUMAN/tr|F6KPG5|F6KPG5_HUMAN/tr|A0A087WWT3|A0A087WWT3_HUMAN/tr|H7C013|H7C013_HUMAN		8.25	0		0	2	MASCOT		T
	R20180100087_1,22335	K.LVAASQAALGL.-	1013.6	-3e-05	2	1	37.52	0	0.00807	0|0	sp|P02768|ALBU_HUMAN/tr|B4DPP6|B4DPP6_HUMAN/tr|C9JKR2|C9JKR2_HUMAN/tr|D6RHD5|D6RHD5_HUMAN/tr|Q56G89|Q56G89_HUMAN/tr|B7WNR0|B7WNR0_HUMAN/tr|H0YA55|H0YA55_HUMAN/tr|B2RBS8|B2RBS8_HUMAN/tr|A8K9P0|A8K9P0_HUMAN/tr|B4DPR2|B4DPR2_HUMAN/tr|F6KPG5|F6KPG5_HUMAN/tr|A0A087WWT3|A0A087WWT3_HUMAN		5.53	0		0	2	MASCOT		T
	R20180100087_1,22960	K.LVAASQAALGL.-	1013.6	-0.00117	2	1	26.65	0	0.0985	0|0	sp|P02768|ALBU_HUMAN/tr|B4DPP6|B4DPP6_HUMAN/tr|C9JKR2|C9JKR2_HUMAN/tr|D6RHD5|D6RHD5_HUMAN/tr|Q56G89|Q56G89_HUMAN/tr|B7WNR0|B7WNR0_HUMAN/tr|H0YA55|H0YA55_HUMAN/tr|B2RBS8|B2RBS8_HUMAN/tr|A8K9P0|A8K9P0_HUMAN/tr|B4DPR2|B4DPR2_HUMAN/tr|F6KPG5|F6KPG5_HUMAN/tr|A0A087WWT3|A0A087WWT3_HUMAN		5.53	0		0	2	MASCOT		T
	R20180100087_1,23928	K.LVAASQAALGL.-	1013.6	0.00103	2	1	25.98	0	0.274	0|0	sp|P02768|ALBU_HUMAN/tr|B4DPP6|B4DPP6_HUMAN/tr|C9JKR2|C9JKR2_HUMAN/tr|D6RHD5|D6RHD5_HUMAN/tr|Q56G89|Q56G89_HUMAN/tr|B7WNR0|B7WNR0_HUMAN/tr|H0YA55|H0YA55_HUMAN/tr|B2RBS8|B2RBS8_HUMAN/tr|A8K9P0|A8K9P0_HUMAN/tr|B4DPR2|B4DPR2_HUMAN/tr|F6KPG5|F6KPG5_HUMAN/tr|A0A087WWT3|A0A087WWT3_HUMAN		5.53	0		0	2	MASCOT		T
	R20180100087_1,30381	K.LVAASQAALGL.-	1013.6	0.00015	2	1	33.51	0	0.0203	0|0	sp|P02768|ALBU_HUMAN/tr|B4DPP6|B4DPP6_HUMAN/tr|C9JKR2|C9JKR2_HUMAN/tr|D6RHD5|D6RHD5_HUMAN/tr|Q56G89|Q56G89_HUMAN/tr|B7WNR0|B7WNR0_HUMAN/tr|H0YA55|H0YA55_HUMAN/tr|B2RBS8|B2RBS8_HUMAN/tr|A8K9P0|A8K9P0_HUMAN/tr|B4DPR2|B4DPR2_HUMAN/tr|F6KPG5|F6KPG5_HUMAN/tr|A0A087WWT3|A0A087WWT3_HUMAN		5.53	0		0	2	MASCOT		T
	R20180100087_1,31177	K.LVAASQAALGL.-	1013.6	-0.00345	2	1	26.84	0	0.118	0|0	sp|P02768|ALBU_HUMAN/tr|B4DPP6|B4DPP6_HUMAN/tr|C9JKR2|C9JKR2_HUMAN/tr|D6RHD5|D6RHD5_HUMAN/tr|Q56G89|Q56G89_HUMAN/tr|B7WNR0|B7WNR0_HUMAN/tr|H0YA55|H0YA55_HUMAN/tr|B2RBS8|B2RBS8_HUMAN/tr|A8K9P0|A8K9P0_HUMAN/tr|B4DPR2|B4DPR2_HUMAN/tr|F6KPG5|F6KPG5_HUMAN/tr|A0A087WWT3|A0A087WWT3_HUMAN		5.53	0		0	2	MASCOT		T
	R20180100087_1,31841	K.LVAASQAALGL.-	1013.6	-0.00037	2	1	35.42	0	0.029	0|0	sp|P02768|ALBU_HUMAN/tr|B4DPP6|B4DPP6_HUMAN/tr|C9JKR2|C9JKR2_HUMAN/tr|D6RHD5|D6RHD5_HUMAN/tr|Q56G89|Q56G89_HUMAN/tr|B7WNR0|B7WNR0_HUMAN/tr|H0YA55|H0YA55_HUMAN/tr|B2RBS8|B2RBS8_HUMAN/tr|A8K9P0|A8K9P0_HUMAN/tr|B4DPR2|B4DPR2_HUMAN/tr|F6KPG5|F6KPG5_HUMAN/tr|A0A087WWT3|A0A087WWT3_HUMAN		5.53	0		0	2	MASCOT		T
	R20180100087_1,32508	K.LVAASQAALGL.-	1013.6	-0.00027	2	1	25.36	0	0.133	0|0	sp|P02768|ALBU_HUMAN/tr|B4DPP6|B4DPP6_HUMAN/tr|C9JKR2|C9JKR2_HUMAN/tr|D6RHD5|D6RHD5_HUMAN/tr|Q56G89|Q56G89_HUMAN/tr|B7WNR0|B7WNR0_HUMAN/tr|H0YA55|H0YA55_HUMAN/tr|B2RBS8|B2RBS8_HUMAN/tr|A8K9P0|A8K9P0_HUMAN/tr|B4DPR2|B4DPR2_HUMAN/tr|F6KPG5|F6KPG5_HUMAN/tr|A0A087WWT3|A0A087WWT3_HUMAN		5.53	0		0	2	MASCOT		T
	R20180100087_1,33130	K.LVAASQAALGL.-	1013.6	0.00163	2	1	35.01	0	0.0344	0|0	sp|P02768|ALBU_HUMAN/tr|B4DPP6|B4DPP6_HUMAN/tr|C9JKR2|C9JKR2_HUMAN/tr|D6RHD5|D6RHD5_HUMAN/tr|Q56G89|Q56G89_HUMAN/tr|B7WNR0|B7WNR0_HUMAN/tr|H0YA55|H0YA55_HUMAN/tr|B2RBS8|B2RBS8_HUMAN/tr|A8K9P0|A8K9P0_HUMAN/tr|B4DPR2|B4DPR2_HUMAN/tr|F6KPG5|F6KPG5_HUMAN/tr|A0A087WWT3|A0A087WWT3_HUMAN		5.53	0		0	2	MASCOT		T
	R20180100087_1,34143	K.LVAASQAALGL.-	1013.6	0.00027	2	1	20.91	0	0.371	0|0	sp|P02768|ALBU_HUMAN/tr|B4DPP6|B4DPP6_HUMAN/tr|C9JKR2|C9JKR2_HUMAN/tr|D6RHD5|D6RHD5_HUMAN/tr|Q56G89|Q56G89_HUMAN/tr|B7WNR0|B7WNR0_HUMAN/tr|H0YA55|H0YA55_HUMAN/tr|B2RBS8|B2RBS8_HUMAN/tr|A8K9P0|A8K9P0_HUMAN/tr|B4DPR2|B4DPR2_HUMAN/tr|F6KPG5|F6KPG5_HUMAN/tr|A0A087WWT3|A0A087WWT3_HUMAN		5.53	0		0	2	MASCOT		T
	R20180100087_1,34655	K.LVAASQAALGL.-	1013.6	-0.00037	2	1	27.51	0	0.179	0|0	sp|P02768|ALBU_HUMAN/tr|B4DPP6|B4DPP6_HUMAN/tr|C9JKR2|C9JKR2_HUMAN/tr|D6RHD5|D6RHD5_HUMAN/tr|Q56G89|Q56G89_HUMAN/tr|B7WNR0|B7WNR0_HUMAN/tr|H0YA55|H0YA55_HUMAN/tr|B2RBS8|B2RBS8_HUMAN/tr|A8K9P0|A8K9P0_HUMAN/tr|B4DPR2|B4DPR2_HUMAN/tr|F6KPG5|F6KPG5_HUMAN/tr|A0A087WWT3|A0A087WWT3_HUMAN		5.53	0		0	2	MASCOT		T
	R20180100087_1,16733	K.LVNEVTEFAK.T	1149.62	-0.00466	2	1	41.79	0	0.00541	0|0	sp|P02768|ALBU_HUMAN/tr|A0A0C4DGB6|A0A0C4DGB6_HUMAN/tr|B4DPP6|B4DPP6_HUMAN/tr|Q56G89|Q56G89_HUMAN/tr|B2RBS8|B2RBS8_HUMAN/tr|A8K9P0|A8K9P0_HUMAN/tr|F6KPG5|F6KPG5_HUMAN/tr|A0A087WWT3|A0A087WWT3_HUMAN/tr|H7C013|H7C013_HUMAN		4.53	0		0	2	MASCOT		T
	R20180100087_1,250	K.LVTDLTK.V	789.472	0.00028	2	1	21.76	0	0.463	0|0	sp|P02768|ALBU_HUMAN/tr|A0A0C4DGB6|A0A0C4DGB6_HUMAN/tr|B4DPP6|B4DPP6_HUMAN/tr|C9JKR2|C9JKR2_HUMAN/tr|D6RHD5|D6RHD5_HUMAN/tr|Q56G89|Q56G89_HUMAN/tr|B7WNR0|B7WNR0_HUMAN/tr|H0YA55|H0YA55_HUMAN/tr|B2RBS8|B2RBS8_HUMAN/tr|A8K9P0|A8K9P0_HUMAN/tr|B4DPR2|B4DPR2_HUMAN/tr|F6KPG5|F6KPG5_HUMAN		5.84	0		0	2	MASCOT		T
	R20180100087_1,9326	K.LVTDLTK.V	789.472	-0.00042	2	1	42.17	0	0.00421	0|0	sp|P02768|ALBU_HUMAN/tr|A0A0C4DGB6|A0A0C4DGB6_HUMAN/tr|B4DPP6|B4DPP6_HUMAN/tr|C9JKR2|C9JKR2_HUMAN/tr|D6RHD5|D6RHD5_HUMAN/tr|Q56G89|Q56G89_HUMAN/tr|B7WNR0|B7WNR0_HUMAN/tr|H0YA55|H0YA55_HUMAN/tr|B2RBS8|B2RBS8_HUMAN/tr|A8K9P0|A8K9P0_HUMAN/tr|B4DPR2|B4DPR2_HUMAN/tr|F6KPG5|F6KPG5_HUMAN		5.84	0		0	2	MASCOT		T
	R20180100087_1,18475	K.QTALVELVK.H	1000.6	-0.00051	2	1	56.62	0	0.000136	0|0	sp|P02768|ALBU_HUMAN/tr|A0A0C4DGB6|A0A0C4DGB6_HUMAN/tr|B4DPP6|B4DPP6_HUMAN/tr|C9JKR2|C9JKR2_HUMAN/tr|D6RHD5|D6RHD5_HUMAN/tr|Q56G89|Q56G89_HUMAN/tr|B7WNR0|B7WNR0_HUMAN/tr|H0YA55|H0YA55_HUMAN/tr|B2RBS8|B2RBS8_HUMAN/tr|A8K9P0|A8K9P0_HUMAN/tr|B4DPR2|B4DPR2_HUMAN/tr|F6KPG5|F6KPG5_HUMAN/tr|A0A087WWT3|A0A087WWT3_HUMAN		6	0		0	2	MASCOT		T
	R20180100087_1,1505	K.SEVAHR.F	698.358	0.0003	2	1	46.98	0	0.000732	0|0	sp|P02768|ALBU_HUMAN/tr|A0A0C4DGB6|A0A0C4DGB6_HUMAN/tr|B4DPP6|B4DPP6_HUMAN/tr|C9JKR2|C9JKR2_HUMAN/tr|Q56G89|Q56G89_HUMAN/tr|B7WNR0|B7WNR0_HUMAN/tr|B2RBS8|B2RBS8_HUMAN/tr|A8K9P0|A8K9P0_HUMAN/tr|B4DPR2|B4DPR2_HUMAN/tr|F6KPG5|F6KPG5_HUMAN/tr|A0A087WWT3|A0A087WWT3_HUMAN/tr|H7C013|H7C013_HUMAN		6.47	0		0	2	MASCOT		T
	R20180100087_1,4624	K.TCVADESAENCDK.S	1498.58	0.00012	2	1	87.61	0	6.94e-09	0|0	sp|P02768|ALBU_HUMAN/tr|A0A0C4DGB6|A0A0C4DGB6_HUMAN/tr|B4DPP6|B4DPP6_HUMAN/tr|Q56G89|Q56G89_HUMAN/tr|B2RBS8|B2RBS8_HUMAN/tr|A8K9P0|A8K9P0_HUMAN/tr|F6KPG5|F6KPG5_HUMAN/tr|A0A087WWT3|A0A087WWT3_HUMAN/tr|H7C013|H7C013_HUMAN		3.92	0		0	2	MASCOT		T
	R20180100087_1,7888	K.TYETTLEK.C	984.488	-0.00032	2	1	34.1	0	0.0188	0|0	sp|P02768|ALBU_HUMAN/tr|A0A0C4DGB6|A0A0C4DGB6_HUMAN/tr|B4DPP6|B4DPP6_HUMAN/tr|C9JKR2|C9JKR2_HUMAN/tr|D6RHD5|D6RHD5_HUMAN/tr|Q56G89|Q56G89_HUMAN/tr|B7WNR0|B7WNR0_HUMAN/tr|H0YA55|H0YA55_HUMAN/tr|B2RBS8|B2RBS8_HUMAN/tr|A8K9P0|A8K9P0_HUMAN/tr|B4DPR2|B4DPR2_HUMAN/tr|F6KPG5|F6KPG5_HUMAN		4.53	0		0	2	MASCOT		T
	R20180100087_1,282	K.VFDEFKPLVEEPQNLIK.Q	2045.1	-0.00061	3	1	25.82	0	0.149	0|0	sp|P02768|ALBU_HUMAN/tr|A0A0C4DGB6|A0A0C4DGB6_HUMAN/tr|B4DPP6|B4DPP6_HUMAN/tr|C9JKR2|C9JKR2_HUMAN/tr|D6RHD5|D6RHD5_HUMAN/tr|Q56G89|Q56G89_HUMAN/tr|B7WNR0|B7WNR0_HUMAN/tr|H0YA55|H0YA55_HUMAN/tr|B2RBS8|B2RBS8_HUMAN/tr|A8K9P0|A8K9P0_HUMAN/tr|B4DPR2|B4DPR2_HUMAN/tr|F6KPG5|F6KPG5_HUMAN/tr|A0A087WWT3|A0A087WWT3_HUMAN		4.41	0		0	2	MASCOT		T
	R20180100087_1,10657	K.VHTECCHGDLLECADDR.A	2086.84	-0.00697	2	1	127.52	0	2.95e-12	0|0	sp|P02768|ALBU_HUMAN/tr|A0A0C4DGB6|A0A0C4DGB6_HUMAN/tr|B4DPP6|B4DPP6_HUMAN/tr|C9JKR2|C9JKR2_HUMAN/tr|D6RHD5|D6RHD5_HUMAN/tr|Q56G89|Q56G89_HUMAN/tr|B7WNR0|B7WNR0_HUMAN/tr|H0YA55|H0YA55_HUMAN/tr|B2RBS8|B2RBS8_HUMAN/tr|A8K9P0|A8K9P0_HUMAN/tr|B4DPR2|B4DPR2_HUMAN/tr|F6KPG5|F6KPG5_HUMAN		4.42	0		0	2	MASCOT		T
	R20180100087_1,13945	K.VHTECCHGDLLECADDRADLAK.Y	2585.12	-0.00081	3	1	22.01	0	0.282	0|0	sp|P02768|ALBU_HUMAN/tr|A0A0C4DGB6|A0A0C4DGB6_HUMAN/tr|B4DPP6|B4DPP6_HUMAN/tr|C9JKR2|C9JKR2_HUMAN/tr|D6RHD5|D6RHD5_HUMAN/tr|Q56G89|Q56G89_HUMAN/tr|B7WNR0|B7WNR0_HUMAN/tr|H0YA55|H0YA55_HUMAN/tr|B2RBS8|B2RBS8_HUMAN/tr|A8K9P0|A8K9P0_HUMAN/tr|B4DPR2|B4DPR2_HUMAN/tr|F6KPG5|F6KPG5_HUMAN		4.51	1		0	2	MASCOT		T
	R20180100087_1,19213	K.VPQVSTPTLVEVSR.N	1511.84	-0.00252	2	1	71.02	0	8.64e-06	0|0	sp|P02768|ALBU_HUMAN/tr|A0A0C4DGB6|A0A0C4DGB6_HUMAN/tr|B4DPP6|B4DPP6_HUMAN/tr|C9JKR2|C9JKR2_HUMAN/tr|D6RHD5|D6RHD5_HUMAN/tr|Q56G89|Q56G89_HUMAN/tr|B7WNR0|B7WNR0_HUMAN/tr|H0YA55|H0YA55_HUMAN/tr|B2RBS8|B2RBS8_HUMAN/tr|A8K9P0|A8K9P0_HUMAN/tr|B4DPR2|B4DPR2_HUMAN/tr|F6KPG5|F6KPG5_HUMAN/tr|A0A087WWT3|A0A087WWT3_HUMAN		5.97	0		0	2	MASCOT		T
	R20180100087_1,8068	K.YICENQDSISSK.L	1443.64	0.00069	2	1	53.37	0	0.000377	0|0	sp|P02768|ALBU_HUMAN/tr|A0A0C4DGB6|A0A0C4DGB6_HUMAN/tr|B4DPP6|B4DPP6_HUMAN/tr|C9JKR2|C9JKR2_HUMAN/tr|D6RHD5|D6RHD5_HUMAN/tr|Q56G89|Q56G89_HUMAN/tr|B7WNR0|B7WNR0_HUMAN/tr|H0YA55|H0YA55_HUMAN/tr|B2RBS8|B2RBS8_HUMAN/tr|A8K9P0|A8K9P0_HUMAN/tr|B4DPR2|B4DPR2_HUMAN/tr|F6KPG5|F6KPG5_HUMAN		4.37	0		0	2	MASCOT		T
	R20180100087_1,8680	K.YICENQDSISSK.L	1443.64	-0.00039	2	1	27.13	0	0.0461	0|0	sp|P02768|ALBU_HUMAN/tr|A0A0C4DGB6|A0A0C4DGB6_HUMAN/tr|B4DPP6|B4DPP6_HUMAN/tr|C9JKR2|C9JKR2_HUMAN/tr|D6RHD5|D6RHD5_HUMAN/tr|Q56G89|Q56G89_HUMAN/tr|B7WNR0|B7WNR0_HUMAN/tr|H0YA55|H0YA55_HUMAN/tr|B2RBS8|B2RBS8_HUMAN/tr|A8K9P0|A8K9P0_HUMAN/tr|B4DPR2|B4DPR2_HUMAN/tr|F6KPG5|F6KPG5_HUMAN		4.37	0		0	2	MASCOT		T
	R20180100087_1,15222	K.YLYEIAR.R ! R.YLYEIAR.R	927.493	-0.00118	2	1	21.29	0	0.422	0|0	sp|P02768|ALBU_HUMAN/tr|A0A0C4DGB6|A0A0C4DGB6_HUMAN/tr|B4DPP6|B4DPP6_HUMAN/tr|Q56G89|Q56G89_HUMAN/tr|B2RBS8|B2RBS8_HUMAN/tr|A8K9P0|A8K9P0_HUMAN/tr|B4DPR2|B4DPR2_HUMAN/tr|F6KPG5|F6KPG5_HUMAN/tr|H7C013|H7C013_HUMAN ! tr|H0YA55|H0YA55_HUMAN		6	0		0	2	MASCOT		T
	R20180100087_1,9574	R.ETYGEMADCCAK.Q	1434.53	-0.00176	2	1	40.51	0	9.78e-05	0|0	sp|P02768|ALBU_HUMAN/tr|A0A0C4DGB6|A0A0C4DGB6_HUMAN/tr|B4DPP6|B4DPP6_HUMAN/tr|Q56G89|Q56G89_HUMAN/tr|B2RBS8|B2RBS8_HUMAN/tr|A8K9P0|A8K9P0_HUMAN/tr|F6KPG5|F6KPG5_HUMAN/tr|A0A087WWT3|A0A087WWT3_HUMAN/tr|H7C013|H7C013_HUMAN		4.14	0		0	2	MASCOT		T
	R20180100087_1,12691	R.FKDLGEENFK.A	1226.61	-0.0026	2	1	32.38	0	0.0482	0|0	sp|P02768|ALBU_HUMAN/tr|A0A0C4DGB6|A0A0C4DGB6_HUMAN/tr|B4DPP6|B4DPP6_HUMAN/tr|C9JKR2|C9JKR2_HUMAN/tr|Q56G89|Q56G89_HUMAN/tr|B7WNR0|B7WNR0_HUMAN/tr|B2RBS8|B2RBS8_HUMAN/tr|B4DPR2|B4DPR2_HUMAN/tr|F6KPG5|F6KPG5_HUMAN/tr|A0A087WWT3|A0A087WWT3_HUMAN/tr|H7C013|H7C013_HUMAN		4.68	1		0	2	MASCOT		T
	R20180100087_1,24969	R.HPDYSVVLLLR.L	1311.74	0.00148	2	1	55.08	0	0.000146	0|0	sp|P02768|ALBU_HUMAN/tr|A0A0C4DGB6|A0A0C4DGB6_HUMAN/tr|B4DPP6|B4DPP6_HUMAN/tr|C9JKR2|C9JKR2_HUMAN/tr|D6RHD5|D6RHD5_HUMAN/tr|Q56G89|Q56G89_HUMAN/tr|B7WNR0|B7WNR0_HUMAN/tr|H0YA55|H0YA55_HUMAN/tr|A8K9P0|A8K9P0_HUMAN/tr|B4DPR2|B4DPR2_HUMAN/tr|F6KPG5|F6KPG5_HUMAN		6.74	0		0	2	MASCOT		T
	R20180100087_1,24981	R.HPDYSVVLLLR.L	1311.74	-0.00021	3	1	36.99	0	0.00935	0|0	sp|P02768|ALBU_HUMAN/tr|A0A0C4DGB6|A0A0C4DGB6_HUMAN/tr|B4DPP6|B4DPP6_HUMAN/tr|C9JKR2|C9JKR2_HUMAN/tr|D6RHD5|D6RHD5_HUMAN/tr|Q56G89|Q56G89_HUMAN/tr|B7WNR0|B7WNR0_HUMAN/tr|H0YA55|H0YA55_HUMAN/tr|A8K9P0|A8K9P0_HUMAN/tr|B4DPR2|B4DPR2_HUMAN/tr|F6KPG5|F6KPG5_HUMAN		6.74	0		0	2	MASCOT		T
	R20180100087_1,29053	R.HPYFYAPELLFFAK.R	1742.89	0.00035	3	1	38.05	0	0.0128	0|0	sp|P02768|ALBU_HUMAN/tr|A0A0C4DGB6|A0A0C4DGB6_HUMAN/tr|B4DPP6|B4DPP6_HUMAN/tr|D6RHD5|D6RHD5_HUMAN/tr|Q56G89|Q56G89_HUMAN/tr|B7WNR0|B7WNR0_HUMAN/tr|H0YA55|H0YA55_HUMAN/tr|B2RBS8|B2RBS8_HUMAN/tr|A8K9P0|A8K9P0_HUMAN/tr|B4DPR2|B4DPR2_HUMAN/tr|F6KPG5|F6KPG5_HUMAN/tr|H7C013|H7C013_HUMAN		6.75	0		0	2	MASCOT		T
	R20180100087_1,26275	R.LVRPEVDVMCTAFHDNEETFLK.K	2650.26	0.00449	3	1	68.78	0	7.65e-06	0|0	sp|P02768|ALBU_HUMAN/tr|A0A0C4DGB6|A0A0C4DGB6_HUMAN/tr|B4DPP6|B4DPP6_HUMAN/tr|Q56G89|Q56G89_HUMAN/tr|B2RBS8|B2RBS8_HUMAN/tr|A8K9P0|A8K9P0_HUMAN/tr|F6KPG5|F6KPG5_HUMAN/tr|A0A087WWT3|A0A087WWT3_HUMAN/tr|H7C013|H7C013_HUMAN		4.5	0		0	2	MASCOT		T
	R20180100087_1,30600	R.M*PCAEDYLSVVLNQLCVLHEK.T	2534.21	0.00313	3	1	37.31	0	0.0186	0|0	sp|P02768|ALBU_HUMAN/tr|A0A0C4DGB6|A0A0C4DGB6_HUMAN/tr|C9JKR2|C9JKR2_HUMAN/tr|D6RHD5|D6RHD5_HUMAN/tr|B7WNR0|B7WNR0_HUMAN/tr|H0YA55|H0YA55_HUMAN/tr|B2RBS8|B2RBS8_HUMAN/tr|A8K9P0|A8K9P0_HUMAN/tr|B4DPR2|B4DPR2_HUMAN/tr|F6KPG5|F6KPG5_HUMAN/tr|A0A087WWT3|A0A087WWT3_HUMAN		4.65	0	15.994919 Oxidation (M)	0	2	MASCOT		T
	R20180100087_1,30420	R.MPCAEDYLSVVLNQLCVLHEK.T	2518.21	0.00654	2	1	36.37	0	0.0239	0|0	sp|P02768|ALBU_HUMAN/tr|A0A0C4DGB6|A0A0C4DGB6_HUMAN/tr|C9JKR2|C9JKR2_HUMAN/tr|D6RHD5|D6RHD5_HUMAN/tr|B7WNR0|B7WNR0_HUMAN/tr|H0YA55|H0YA55_HUMAN/tr|B2RBS8|B2RBS8_HUMAN/tr|A8K9P0|A8K9P0_HUMAN/tr|B4DPR2|B4DPR2_HUMAN/tr|F6KPG5|F6KPG5_HUMAN/tr|A0A087WWT3|A0A087WWT3_HUMAN		4.65	0		0	2	MASCOT		T
	R20180100087_1,30561	R.MPCAEDYLSVVLNQLCVLHEK.T	2518.21	-0.00288	4	1	49.81	0	0.000665	0|0	sp|P02768|ALBU_HUMAN/tr|A0A0C4DGB6|A0A0C4DGB6_HUMAN/tr|C9JKR2|C9JKR2_HUMAN/tr|D6RHD5|D6RHD5_HUMAN/tr|B7WNR0|B7WNR0_HUMAN/tr|H0YA55|H0YA55_HUMAN/tr|B2RBS8|B2RBS8_HUMAN/tr|A8K9P0|A8K9P0_HUMAN/tr|B4DPR2|B4DPR2_HUMAN/tr|F6KPG5|F6KPG5_HUMAN/tr|A0A087WWT3|A0A087WWT3_HUMAN		4.65	0		0	2	MASCOT		T
	R20180100087_1,31021	R.MPCAEDYLSVVLNQLCVLHEK.T	2518.21	0.00424	3	1	77.04	0	2.06e-06	0|0	sp|P02768|ALBU_HUMAN/tr|A0A0C4DGB6|A0A0C4DGB6_HUMAN/tr|C9JKR2|C9JKR2_HUMAN/tr|D6RHD5|D6RHD5_HUMAN/tr|B7WNR0|B7WNR0_HUMAN/tr|H0YA55|H0YA55_HUMAN/tr|B2RBS8|B2RBS8_HUMAN/tr|A8K9P0|A8K9P0_HUMAN/tr|B4DPR2|B4DPR2_HUMAN/tr|F6KPG5|F6KPG5_HUMAN/tr|A0A087WWT3|A0A087WWT3_HUMAN		4.65	0		0	2	MASCOT		T
	R20180100087_1,22004	R.RHPDYSVVLLLR.L	1467.84	0.0022	3	1	44.29	0	0.00206	0|0	sp|P02768|ALBU_HUMAN/tr|A0A0C4DGB6|A0A0C4DGB6_HUMAN/tr|B4DPP6|B4DPP6_HUMAN/tr|C9JKR2|C9JKR2_HUMAN/tr|D6RHD5|D6RHD5_HUMAN/tr|Q56G89|Q56G89_HUMAN/tr|B7WNR0|B7WNR0_HUMAN/tr|H0YA55|H0YA55_HUMAN/tr|A8K9P0|A8K9P0_HUMAN/tr|B4DPR2|B4DPR2_HUMAN/tr|F6KPG5|F6KPG5_HUMAN		8.75	1		0	2	MASCOT		T
	R20180100087_1,21663	R.RPCFSALEVDETYVPK.E	1910.93	0.00291	3	1	38.56	0	0.0225	0|0	sp|P02768|ALBU_HUMAN/tr|A0A0C4DGB6|A0A0C4DGB6_HUMAN/tr|B4DPP6|B4DPP6_HUMAN/tr|C9JKR2|C9JKR2_HUMAN/tr|D6RHD5|D6RHD5_HUMAN/tr|B7WNR0|B7WNR0_HUMAN/tr|H0YA55|H0YA55_HUMAN/tr|B2RBS8|B2RBS8_HUMAN/tr|A8K9P0|A8K9P0_HUMAN/tr|B4DPR2|B4DPR2_HUMAN/tr|F6KPG5|F6KPG5_HUMAN/tr|A0A087WWT3|A0A087WWT3_HUMAN		4.68	0		0	2	MASCOT		T
$11-1	sp|P11142|HSP7C_HUMAN Heat shock cognate 71 kDa protein OS=Homo sapiens GN=HSPA8 PE=1 SV=1	56	31	0.6238	70897.2	5.37
$11-2	tr|V9HW22|V9HW22_HUMAN Epididymis luminal protein 33 OS=Homo sapiens GN=HEL-S-72p PE=2 SV=1	56	31	0.6238	70897.2	5.37
	R20180100087_1,24849	K.CNEIINWLDK.N	1304.63	0.0028	2	1	26.09	0	0.193	0|0	sp|P11142|HSP7C_HUMAN/tr|Q96H53|Q96H53_HUMAN/tr|V9HW22|V9HW22_HUMAN/tr|A8K7Q2|A8K7Q2_HUMAN/tr|Q53GZ6|Q53GZ6_HUMAN/tr|E9PKE3|E9PKE3_HUMAN/tr|Q96BE0|Q96BE0_HUMAN/tr|B3KTV0|B3KTV0_HUMAN/tr|E9PM13|E9PM13_HUMAN/tr|E9PS65|E9PS65_HUMAN/tr|B4E1Q1|B4E1Q1_HUMAN/tr|E9PNE6|E9PNE6_HUMAN/tr|Q9NWW3|Q9NWW3_HUMAN/tr|Q9NZ87|Q9NZ87_HUMAN/tr|Q96IS6|Q96IS6_HUMAN		4.37	0		0	2	MASCOT		T
	R20180100087_1,26428	K.CNEIINWLDK.N	1304.63	-0.00124	2	1	61.06	0	4.91e-05	0|0	sp|P11142|HSP7C_HUMAN/tr|Q96H53|Q96H53_HUMAN/tr|V9HW22|V9HW22_HUMAN/tr|A8K7Q2|A8K7Q2_HUMAN/tr|Q53GZ6|Q53GZ6_HUMAN/tr|E9PKE3|E9PKE3_HUMAN/tr|Q96BE0|Q96BE0_HUMAN/tr|B3KTV0|B3KTV0_HUMAN/tr|E9PM13|E9PM13_HUMAN/tr|E9PS65|E9PS65_HUMAN/tr|B4E1Q1|B4E1Q1_HUMAN/tr|E9PNE6|E9PNE6_HUMAN/tr|Q9NWW3|Q9NWW3_HUMAN/tr|Q9NZ87|Q9NZ87_HUMAN/tr|Q96IS6|Q96IS6_HUMAN		4.37	0		0	2	MASCOT		T
	R20180100087_1,29786	K.CNEIINWLDK.N	1304.63	-0.00128	2	1	39.57	0	0.00692	0|0	sp|P11142|HSP7C_HUMAN/tr|Q96H53|Q96H53_HUMAN/tr|V9HW22|V9HW22_HUMAN/tr|A8K7Q2|A8K7Q2_HUMAN/tr|Q53GZ6|Q53GZ6_HUMAN/tr|E9PKE3|E9PKE3_HUMAN/tr|Q96BE0|Q96BE0_HUMAN/tr|B3KTV0|B3KTV0_HUMAN/tr|E9PM13|E9PM13_HUMAN/tr|E9PS65|E9PS65_HUMAN/tr|B4E1Q1|B4E1Q1_HUMAN/tr|E9PNE6|E9PNE6_HUMAN/tr|Q9NWW3|Q9NWW3_HUMAN/tr|Q9NZ87|Q9NZ87_HUMAN/tr|Q96IS6|Q96IS6_HUMAN		4.37	0		0	2	MASCOT		T
	R20180100087_1,22967	K.DAGTIAGLNVLR.I ! K.DAGTIAGLNVLR.-	1199.67	-0.00232	3	1	57.2	0	0.000147	0|0	sp|P11142|HSP7C_HUMAN/tr|V9HW22|V9HW22_HUMAN/tr|Q53GZ6|Q53GZ6_HUMAN/tr|E9PKE3|E9PKE3_HUMAN/tr|B3KTV0|B3KTV0_HUMAN/tr|Q53HF2|Q53HF2_HUMAN/tr|E9PK54|E9PK54_HUMAN/tr|B4E1Q1|B4E1Q1_HUMAN/tr|E9PLF4|E9PLF4_HUMAN/tr|E9PN89|E9PN89_HUMAN/tr|A4D111|A4D111_HUMAN/tr|E9PI65|E9PI65_HUMAN/tr|E9PQK7|E9PQK7_HUMAN/tr|B4DTX2|B4DTX2_HUMAN/tr|Q96IS6|Q96IS6_HUMAN ! tr|E9PQQ4|E9PQQ4_HUMAN		5.84	0		0	2	MASCOT		T
	R20180100087_1,7586	K.DNNLLGK.F	773.415	0.00017	2	1	25.9	0	0.38	0|0	sp|P54652|HSP72_HUMAN/sp|P11142|HSP7C_HUMAN/tr|Q96H53|Q96H53_HUMAN/tr|V9HW22|V9HW22_HUMAN/tr|A8K7Q2|A8K7Q2_HUMAN/tr|Q53GZ6|Q53GZ6_HUMAN/tr|B3KUS2|B3KUS2_HUMAN/tr|E9PKE3|E9PKE3_HUMAN/tr|Q96BE0|Q96BE0_HUMAN/tr|B3KTV0|B3KTV0_HUMAN/tr|E9PM13|E9PM13_HUMAN/tr|Q53HF2|Q53HF2_HUMAN/tr|E9PS65|E9PS65_HUMAN/tr|B4E1Q1|B4E1Q1_HUMAN/tr|A4D110|A4D110_HUMAN/tr|A0A024R6B5|A0A024R6B5_HUMAN/tr|E9PNE6|E9PNE6_HUMAN/tr…		5.84	0		0	2	MASCOT		T
	R20180100087_1,14156	K.EIAEAYLGK.T ! K.EIAEAYLGK.A ! K.EIAEAYLGK.-	993.525	-0.00203	2	1	23.27	0	0.931	0|0	sp|P11142|HSP7C_HUMAN/tr|V9HW22|V9HW22_HUMAN/tr|Q53GZ6|Q53GZ6_HUMAN/tr|E9PQQ4|E9PQQ4_HUMAN/tr|B3KTV0|B3KTV0_HUMAN/tr|Q53HF2|Q53HF2_HUMAN/tr|E9PK54|E9PK54_HUMAN/tr|E9PLF4|E9PLF4_HUMAN/tr|E9PN89|E9PN89_HUMAN/tr|A4D111|A4D111_HUMAN/tr|E9PI65|E9PI65_HUMAN/tr|E9PQK7|E9PQK7_HUMAN/tr|B4DTX2|B4DTX2_HUMAN/tr|Q96IS6|Q96IS6_HUMAN ! tr|E9PKE3|E9PKE3_HUMAN ! tr|E9PPY6|E9PPY6_HUMAN		4.53	0		0	2	MASCOT		T
	R20180100087_1,24876	K.GPAVGIDLGTTYSCVGVFQHGK.V	2263.12	0.0001	2	1	119.47	0	8.26e-11	0|0	sp|P11142|HSP7C_HUMAN/tr|V9HW22|V9HW22_HUMAN/tr|Q53GZ6|Q53GZ6_HUMAN/tr|E9PKE3|E9PKE3_HUMAN/tr|E9PN25|E9PN25_HUMAN/tr|E9PQQ4|E9PQQ4_HUMAN/tr|B3KTV0|B3KTV0_HUMAN/tr|E9PPY6|E9PPY6_HUMAN/tr|Q53HF2|Q53HF2_HUMAN/tr|E9PK54|E9PK54_HUMAN/tr|E9PLF4|E9PLF4_HUMAN/tr|E9PI65|E9PI65_HUMAN/tr|E9PNE6|E9PNE6_HUMAN/tr|E9PQK7|E9PQK7_HUMAN/tr|B4DTX2|B4DTX2_HUMAN		6.73	0		0	2	MASCOT		T
	R20180100087_1,25033	K.GPAVGIDLGTTYSCVGVFQHGK.V	2263.12	-0.00018	3	1	104.22	0	2.76e-09	0|0	sp|P11142|HSP7C_HUMAN/tr|V9HW22|V9HW22_HUMAN/tr|Q53GZ6|Q53GZ6_HUMAN/tr|E9PKE3|E9PKE3_HUMAN/tr|E9PN25|E9PN25_HUMAN/tr|E9PQQ4|E9PQQ4_HUMAN/tr|B3KTV0|B3KTV0_HUMAN/tr|E9PPY6|E9PPY6_HUMAN/tr|Q53HF2|Q53HF2_HUMAN/tr|E9PK54|E9PK54_HUMAN/tr|E9PLF4|E9PLF4_HUMAN/tr|E9PI65|E9PI65_HUMAN/tr|E9PNE6|E9PNE6_HUMAN/tr|E9PQK7|E9PQK7_HUMAN/tr|B4DTX2|B4DTX2_HUMAN		6.73	0		0	2	MASCOT		T
	R20180100087_1,25665	K.GPAVGIDLGTTYSCVGVFQHGK.V	2263.12	0.00756	3	1	56.75	0	0.000159	0|0	sp|P11142|HSP7C_HUMAN/tr|V9HW22|V9HW22_HUMAN/tr|Q53GZ6|Q53GZ6_HUMAN/tr|E9PKE3|E9PKE3_HUMAN/tr|E9PN25|E9PN25_HUMAN/tr|E9PQQ4|E9PQQ4_HUMAN/tr|B3KTV0|B3KTV0_HUMAN/tr|E9PPY6|E9PPY6_HUMAN/tr|Q53HF2|Q53HF2_HUMAN/tr|E9PK54|E9PK54_HUMAN/tr|E9PLF4|E9PLF4_HUMAN/tr|E9PI65|E9PI65_HUMAN/tr|E9PNE6|E9PNE6_HUMAN/tr|E9PQK7|E9PQK7_HUMAN/tr|B4DTX2|B4DTX2_HUMAN		6.73	0		0	2	MASCOT		T
	R20180100087_1,26604	K.ILDKCNEIINWLDK.N	1773.92	-0.0027	3	1	26.42	0	0.199	0|0	sp|P11142|HSP7C_HUMAN/tr|Q96H53|Q96H53_HUMAN/tr|V9HW22|V9HW22_HUMAN/tr|A8K7Q2|A8K7Q2_HUMAN/tr|Q53GZ6|Q53GZ6_HUMAN/tr|E9PKE3|E9PKE3_HUMAN/tr|Q96BE0|Q96BE0_HUMAN/tr|B3KTV0|B3KTV0_HUMAN/tr|E9PM13|E9PM13_HUMAN/tr|E9PS65|E9PS65_HUMAN/tr|B4E1Q1|B4E1Q1_HUMAN/tr|E9PNE6|E9PNE6_HUMAN/tr|Q9NWW3|Q9NWW3_HUMAN/tr|Q9NZ87|Q9NZ87_HUMAN/tr|Q96IS6|Q96IS6_HUMAN		4.56	1		0	2	MASCOT		T
	R20180100087_1,4454	K.ITITNDKGR.L	1017.57	0.00076	2	1	38.57	0	0.0137	0|0	sp|P34931|HS71L_HUMAN/sp|P54652|HSP72_HUMAN/sp|P0DMV8|HS71A_HUMAN/sp|P0DMV9|HS71B_HUMAN/sp|P11142|HSP7C_HUMAN/sp|P17066|HSP76_HUMAN/tr|A0A0G2JIW1|A0A0G2JIW1_HUMAN/tr|V9GZ37|V9GZ37_HUMAN/tr|B4DVU9|B4DVU9_HUMAN/tr|Q96H53|Q96H53_HUMAN/tr|B4DNT8|B4DNT8_HUMAN/tr|B4DI54|B4DI54_HUMAN/tr|Q53FA3|Q53FA3_HUMAN/tr|V9HW22|V9HW22_HUMAN/tr|A8K7Q2|A8K7Q2_HUMAN/tr|Q53GZ6|Q53GZ6_HUMAN/tr|B3KUS2|B3KUS2_HUMAN/tr|E9P…		8.75	1		0	2	MASCOT		T
	R20180100087_1,4482	K.ITITNDKGR.L	1017.57	0.00126	3	1	22.31	0	0.61	0|0	sp|P34931|HS71L_HUMAN/sp|P54652|HSP72_HUMAN/sp|P0DMV8|HS71A_HUMAN/sp|P0DMV9|HS71B_HUMAN/sp|P11142|HSP7C_HUMAN/sp|P17066|HSP76_HUMAN/tr|A0A0G2JIW1|A0A0G2JIW1_HUMAN/tr|V9GZ37|V9GZ37_HUMAN/tr|B4DVU9|B4DVU9_HUMAN/tr|Q96H53|Q96H53_HUMAN/tr|B4DNT8|B4DNT8_HUMAN/tr|B4DI54|B4DI54_HUMAN/tr|Q53FA3|Q53FA3_HUMAN/tr|V9HW22|V9HW22_HUMAN/tr|A8K7Q2|A8K7Q2_HUMAN/tr|Q53GZ6|Q53GZ6_HUMAN/tr|B3KUS2|B3KUS2_HUMAN/tr|E9P…		8.75	1		0	2	MASCOT		T
	R20180100087_1,23255	K.LLQDFFNGK.E	1081.57	0.00145	2	1	54.95	0	0.000241	0|0	sp|P54652|HSP72_HUMAN/sp|P11142|HSP7C_HUMAN/sp|P17066|HSP76_HUMAN/tr|V9HW22|V9HW22_HUMAN/tr|A8K7Q2|A8K7Q2_HUMAN/tr|Q53GZ6|Q53GZ6_HUMAN/tr|B3KUS2|B3KUS2_HUMAN/tr|E9PKE3|E9PKE3_HUMAN/tr|B3KTV0|B3KTV0_HUMAN/tr|Q53FC7|Q53FC7_HUMAN/tr|B4DHP5|B4DHP5_HUMAN/tr|B3KSM6|B3KSM6_HUMAN/tr|Q53HF2|Q53HF2_HUMAN/tr|B4E1Q1|B4E1Q1_HUMAN/tr|E9PN89|E9PN89_HUMAN/tr|A0A024R6B5|A0A024R6B5_HUMAN/tr|E9PNE6|E9PNE6_HUMAN/tr|…		5.84	0		0	2	MASCOT		T
	R20180100087_1,14533	K.MKEIAEAYLGK.T ! K.MKEIAEAYLGK.A ! K.MKEIAEAYLGK.-	1252.66	0.00099	2	1	67.2	0	1.57e-05	0|0	sp|P11142|HSP7C_HUMAN/tr|V9HW22|V9HW22_HUMAN/tr|Q53GZ6|Q53GZ6_HUMAN/tr|E9PQQ4|E9PQQ4_HUMAN/tr|B3KTV0|B3KTV0_HUMAN/tr|Q53HF2|Q53HF2_HUMAN/tr|E9PK54|E9PK54_HUMAN/tr|E9PLF4|E9PLF4_HUMAN/tr|E9PN89|E9PN89_HUMAN/tr|A4D111|A4D111_HUMAN/tr|E9PI65|E9PI65_HUMAN/tr|E9PQK7|E9PQK7_HUMAN/tr|B4DTX2|B4DTX2_HUMAN/tr|Q96IS6|Q96IS6_HUMAN ! tr|E9PKE3|E9PKE3_HUMAN ! tr|E9PPY6|E9PPY6_HUMAN		5.9	1		0	2	MASCOT		T
	R20180100087_1,4080	K.NQTAEKEEFEHQQK.E	1745.81	-0.0015	3	1	39.76	0	0.00498	0|0	sp|P11142|HSP7C_HUMAN/tr|Q96H53|Q96H53_HUMAN/tr|V9HW22|V9HW22_HUMAN/tr|A8K7Q2|A8K7Q2_HUMAN/tr|Q53GZ6|Q53GZ6_HUMAN/tr|E9PKE3|E9PKE3_HUMAN/tr|Q96BE0|Q96BE0_HUMAN/tr|B3KTV0|B3KTV0_HUMAN/tr|E9PM13|E9PM13_HUMAN/tr|E9PS65|E9PS65_HUMAN/tr|B4E1Q1|B4E1Q1_HUMAN/tr|E9PNE6|E9PNE6_HUMAN/tr|Q9NWW3|Q9NWW3_HUMAN/tr|Q9NZ87|Q9NZ87_HUMAN/tr|Q96IS6|Q96IS6_HUMAN		4.91	1		0	2	MASCOT		T
	R20180100087_1,4083	K.NQTAEKEEFEHQQK.E	1745.81	0.00136	2	1	85.84	0	1.18e-07	0|0	sp|P11142|HSP7C_HUMAN/tr|Q96H53|Q96H53_HUMAN/tr|V9HW22|V9HW22_HUMAN/tr|A8K7Q2|A8K7Q2_HUMAN/tr|Q53GZ6|Q53GZ6_HUMAN/tr|E9PKE3|E9PKE3_HUMAN/tr|Q96BE0|Q96BE0_HUMAN/tr|B3KTV0|B3KTV0_HUMAN/tr|E9PM13|E9PM13_HUMAN/tr|E9PS65|E9PS65_HUMAN/tr|B4E1Q1|B4E1Q1_HUMAN/tr|E9PNE6|E9PNE6_HUMAN/tr|Q9NWW3|Q9NWW3_HUMAN/tr|Q9NZ87|Q9NZ87_HUMAN/tr|Q96IS6|Q96IS6_HUMAN		4.91	1		0	2	MASCOT		T
	R20180100087_1,18480	K.NQVAMNPTNTVFDAK.R	1649.8	0.00245	2	1	50.9	0	0.00209	0|0	sp|P11142|HSP7C_HUMAN/tr|V9HW22|V9HW22_HUMAN/tr|Q53GZ6|Q53GZ6_HUMAN/tr|E9PKE3|E9PKE3_HUMAN/tr|E9PN25|E9PN25_HUMAN/tr|E9PQQ4|E9PQQ4_HUMAN/tr|E9PPY6|E9PPY6_HUMAN/tr|Q53HF2|Q53HF2_HUMAN/tr|E9PK54|E9PK54_HUMAN/tr|E9PLF4|E9PLF4_HUMAN/tr|E9PNE6|E9PNE6_HUMAN/tr|E9PQK7|E9PQK7_HUMAN/tr|B4DTX2|B4DTX2_HUMAN		5.84	0		0	2	MASCOT		T
	R20180100087_1,26652	K.QTQTFTTYSDNQPGVLIQVYEGER.A	2774.33	-0.00034	3	1	61.54	0	5.96e-05	0|0	sp|P11142|HSP7C_HUMAN/tr|V9HW22|V9HW22_HUMAN/tr|A8K7Q2|A8K7Q2_HUMAN/tr|Q53GZ6|Q53GZ6_HUMAN/tr|E9PKE3|E9PKE3_HUMAN/tr|Q96BE0|Q96BE0_HUMAN/tr|B3KTV0|B3KTV0_HUMAN/tr|Q53HF2|Q53HF2_HUMAN/tr|E9PS65|E9PS65_HUMAN/tr|B4E1Q1|B4E1Q1_HUMAN/tr|E9PNE6|E9PNE6_HUMAN/tr|Q96IS6|Q96IS6_HUMAN		4.14	0		0	2	MASCOT		T
	R20180100087_1,32909	K.SENVQDLLLLDVTPLSLGIETAGGVMTVLIK.R	3238.79	-0.00312	3	1	72.26	0	1.93e-06	0|0	sp|P11142|HSP7C_HUMAN/tr|V9HW22|V9HW22_HUMAN/tr|A8K7Q2|A8K7Q2_HUMAN/tr|Q53GZ6|Q53GZ6_HUMAN/tr|E9PKE3|E9PKE3_HUMAN/tr|Q96BE0|Q96BE0_HUMAN/tr|B3KTV0|B3KTV0_HUMAN/tr|B4E1Q1|B4E1Q1_HUMAN/tr|E9PNE6|E9PNE6_HUMAN/tr|Q96IS6|Q96IS6_HUMAN		3.92	0		0	2	MASCOT		T
	R20180100087_1,26423	K.SFYPEEVSSMVLTK.M	1616.79	-0.00042	2	1	61.63	0	4.51e-05	0|0	sp|P11142|HSP7C_HUMAN/tr|V9HW22|V9HW22_HUMAN/tr|Q53GZ6|Q53GZ6_HUMAN/tr|E9PKE3|E9PKE3_HUMAN/tr|E9PN25|E9PN25_HUMAN/tr|E9PQQ4|E9PQQ4_HUMAN/tr|B3KTV0|B3KTV0_HUMAN/tr|E9PPY6|E9PPY6_HUMAN/tr|Q53HF2|Q53HF2_HUMAN/tr|E9PK54|E9PK54_HUMAN/tr|E9PLF4|E9PLF4_HUMAN/tr|E9PN89|E9PN89_HUMAN/tr|E9PI65|E9PI65_HUMAN/tr|E9PQK7|E9PQK7_HUMAN/tr|B4DTX2|B4DTX2_HUMAN/tr|Q96IS6|Q96IS6_HUMAN		4.53	0		0	2	MASCOT		T
	R20180100087_1,26474	K.SFYPEEVSSMVLTK.M	1616.79	-0.00454	3	1	47.71	0	0.00116	0|0	sp|P11142|HSP7C_HUMAN/tr|V9HW22|V9HW22_HUMAN/tr|Q53GZ6|Q53GZ6_HUMAN/tr|E9PKE3|E9PKE3_HUMAN/tr|E9PN25|E9PN25_HUMAN/tr|E9PQQ4|E9PQQ4_HUMAN/tr|B3KTV0|B3KTV0_HUMAN/tr|E9PPY6|E9PPY6_HUMAN/tr|Q53HF2|Q53HF2_HUMAN/tr|E9PK54|E9PK54_HUMAN/tr|E9PLF4|E9PLF4_HUMAN/tr|E9PN89|E9PN89_HUMAN/tr|E9PI65|E9PI65_HUMAN/tr|E9PQK7|E9PQK7_HUMAN/tr|B4DTX2|B4DTX2_HUMAN/tr|Q96IS6|Q96IS6_HUMAN		4.53	0		0	2	MASCOT		T
	R20180100087_1,28902	K.SINPDEAVAYGAAVQAAILSGDK.S	2260.15	0.00109	3	1	83.91	0	3.06e-07	0|0	sp|P11142|HSP7C_HUMAN/tr|V9HW22|V9HW22_HUMAN/tr|A8K7Q2|A8K7Q2_HUMAN/tr|Q53GZ6|Q53GZ6_HUMAN/tr|E9PKE3|E9PKE3_HUMAN/tr|B3KTV0|B3KTV0_HUMAN/tr|Q53HF2|Q53HF2_HUMAN/tr|B4E1Q1|B4E1Q1_HUMAN/tr|E9PNE6|E9PNE6_HUMAN/tr|Q96IS6|Q96IS6_HUMAN		4.03	0		0	2	MASCOT		T
	R20180100087_1,28903	K.SINPDEAVAYGAAVQAAILSGDK.S	2260.15	0.00035	2	1	125.95	0	1.92e-11	0|0	sp|P11142|HSP7C_HUMAN/tr|V9HW22|V9HW22_HUMAN/tr|A8K7Q2|A8K7Q2_HUMAN/tr|Q53GZ6|Q53GZ6_HUMAN/tr|E9PKE3|E9PKE3_HUMAN/tr|B3KTV0|B3KTV0_HUMAN/tr|Q53HF2|Q53HF2_HUMAN/tr|B4E1Q1|B4E1Q1_HUMAN/tr|E9PNE6|E9PNE6_HUMAN/tr|Q96IS6|Q96IS6_HUMAN		4.03	0		0	2	MASCOT		T
	R20180100087_1,15436	K.SQIHDIVLVGGSTR.I	1481.81	-0.00141	3	1	36.84	0	0.0125	0|0	sp|P11142|HSP7C_HUMAN/tr|V9HW22|V9HW22_HUMAN/tr|A8K7Q2|A8K7Q2_HUMAN/tr|Q53GZ6|Q53GZ6_HUMAN/tr|E9PKE3|E9PKE3_HUMAN/tr|B3KTV0|B3KTV0_HUMAN/tr|Q53HF2|Q53HF2_HUMAN/tr|B4E1Q1|B4E1Q1_HUMAN/tr|E9PN89|E9PN89_HUMAN/tr|E9PNE6|E9PNE6_HUMAN/tr|Q96IS6|Q96IS6_HUMAN		6.46	0		0	2	MASCOT		T
	R20180100087_1,15437	K.SQIHDIVLVGGSTR.I	1481.81	-0.00136	2	1	55.54	0	0.000169	0|0	sp|P11142|HSP7C_HUMAN/tr|V9HW22|V9HW22_HUMAN/tr|A8K7Q2|A8K7Q2_HUMAN/tr|Q53GZ6|Q53GZ6_HUMAN/tr|E9PKE3|E9PKE3_HUMAN/tr|B3KTV0|B3KTV0_HUMAN/tr|Q53HF2|Q53HF2_HUMAN/tr|B4E1Q1|B4E1Q1_HUMAN/tr|E9PN89|E9PN89_HUMAN/tr|E9PNE6|E9PNE6_HUMAN/tr|Q96IS6|Q96IS6_HUMAN		6.46	0		0	2	MASCOT		T
	R20180100087_1,10043	K.STAGDTHLGGEDFDNR.M	1691.73	-0.00072	2	1	75.34	0	8.93e-07	0|0	sp|P54652|HSP72_HUMAN/sp|P11142|HSP7C_HUMAN/tr|V9HW22|V9HW22_HUMAN/tr|Q53GZ6|Q53GZ6_HUMAN/tr|E9PKE3|E9PKE3_HUMAN/tr|B3KTV0|B3KTV0_HUMAN/tr|Q53HF2|Q53HF2_HUMAN/tr|E9PN89|E9PN89_HUMAN/tr|A0A024R6B5|A0A024R6B5_HUMAN/tr|Q96IS6|Q96IS6_HUMAN		4.22	0		0	2	MASCOT		T
	R20180100087_1,10528	K.STAGDTHLGGEDFDNR.M	1691.73	-0.00015	3	1	32.54	0	0.00786	0|0	sp|P54652|HSP72_HUMAN/sp|P11142|HSP7C_HUMAN/tr|V9HW22|V9HW22_HUMAN/tr|Q53GZ6|Q53GZ6_HUMAN/tr|E9PKE3|E9PKE3_HUMAN/tr|B3KTV0|B3KTV0_HUMAN/tr|Q53HF2|Q53HF2_HUMAN/tr|E9PN89|E9PN89_HUMAN/tr|A0A024R6B5|A0A024R6B5_HUMAN/tr|Q96IS6|Q96IS6_HUMAN		4.22	0		0	2	MASCOT		T
	R20180100087_1,10782	K.STAGDTHLGGEDFDNR.M	1691.73	-0.00532	2	1	29.89	0	0.037	0|0	sp|P54652|HSP72_HUMAN/sp|P11142|HSP7C_HUMAN/tr|V9HW22|V9HW22_HUMAN/tr|Q53GZ6|Q53GZ6_HUMAN/tr|E9PKE3|E9PKE3_HUMAN/tr|B3KTV0|B3KTV0_HUMAN/tr|Q53HF2|Q53HF2_HUMAN/tr|E9PN89|E9PN89_HUMAN/tr|A0A024R6B5|A0A024R6B5_HUMAN/tr|Q96IS6|Q96IS6_HUMAN		4.22	0		0	2	MASCOT		T
	R20180100087_1,22727	K.TVTNAVVTVPAYFNDSQR.Q	1982	-0.00098	2	1	43.22	0	0.00364	0|0	sp|P11142|HSP7C_HUMAN/tr|V9HW22|V9HW22_HUMAN/tr|Q53GZ6|Q53GZ6_HUMAN/tr|E9PQQ4|E9PQQ4_HUMAN/tr|B3KTV0|B3KTV0_HUMAN/tr|Q53HF2|Q53HF2_HUMAN/tr|E9PK54|E9PK54_HUMAN/tr|E9PLF4|E9PLF4_HUMAN/tr|E9PN89|E9PN89_HUMAN/tr|E9PI65|E9PI65_HUMAN/tr|E9PQK7|E9PQK7_HUMAN/tr|B4DTX2|B4DTX2_HUMAN/tr|Q96IS6|Q96IS6_HUMAN		5.5	0		0	2	MASCOT		T
	R20180100087_1,23354	K.TVTNAVVTVPAYFNDSQR.Q	1982	0.00166	2	1	65.89	0	2.02e-05	0|0	sp|P11142|HSP7C_HUMAN/tr|V9HW22|V9HW22_HUMAN/tr|Q53GZ6|Q53GZ6_HUMAN/tr|E9PQQ4|E9PQQ4_HUMAN/tr|B3KTV0|B3KTV0_HUMAN/tr|Q53HF2|Q53HF2_HUMAN/tr|E9PK54|E9PK54_HUMAN/tr|E9PLF4|E9PLF4_HUMAN/tr|E9PN89|E9PN89_HUMAN/tr|E9PI65|E9PI65_HUMAN/tr|E9PQK7|E9PQK7_HUMAN/tr|B4DTX2|B4DTX2_HUMAN/tr|Q96IS6|Q96IS6_HUMAN		5.5	0		0	2	MASCOT		T
	R20180100087_1,9986	K.VCNPIITK.L	944.523	-0.00049	2	1	31.4	0	0.0811	0|0	sp|P11142|HSP7C_HUMAN/tr|Q96H53|Q96H53_HUMAN/tr|V9HW22|V9HW22_HUMAN/tr|A8K7Q2|A8K7Q2_HUMAN/tr|Q53GZ6|Q53GZ6_HUMAN/tr|E9PKE3|E9PKE3_HUMAN/tr|Q96BE0|Q96BE0_HUMAN/tr|B3KTV0|B3KTV0_HUMAN/tr|E9PS65|E9PS65_HUMAN/tr|B4E1Q1|B4E1Q1_HUMAN/tr|E9PNE6|E9PNE6_HUMAN/tr|Q9NWW3|Q9NWW3_HUMAN/tr|Q9NZ87|Q9NZ87_HUMAN/tr|Q96IS6|Q96IS6_HUMAN		8.19	0		0	2	MASCOT		T
	R20180100087_1,1843	K.YKAEDEK.Q	882.42	0.00018	2	1	38.28	0	0.00756	0|0	sp|P11142|HSP7C_HUMAN/tr|Q96H53|Q96H53_HUMAN/tr|V9HW22|V9HW22_HUMAN/tr|A8K7Q2|A8K7Q2_HUMAN/tr|Q53GZ6|Q53GZ6_HUMAN/tr|E9PKE3|E9PKE3_HUMAN/tr|Q96BE0|Q96BE0_HUMAN/tr|B3KTV0|B3KTV0_HUMAN/tr|E9PM13|E9PM13_HUMAN/tr|E9PS65|E9PS65_HUMAN/tr|B4E1Q1|B4E1Q1_HUMAN/tr|E9PNE6|E9PNE6_HUMAN/tr|Q9NZ87|Q9NZ87_HUMAN/tr|Q96IS6|Q96IS6_HUMAN		4.68	1		0	2	MASCOT		T
	R20180100087_1,23036	R.ARFEELNADLFR.G	1480.75	-0.00447	2	1	46	0	0.00327	0|0	sp|P54652|HSP72_HUMAN/sp|P11142|HSP7C_HUMAN/tr|V9HW22|V9HW22_HUMAN/tr|A8K7Q2|A8K7Q2_HUMAN/tr|Q53GZ6|Q53GZ6_HUMAN/tr|E9PKE3|E9PKE3_HUMAN/tr|B3KTV0|B3KTV0_HUMAN/tr|Q53HF2|Q53HF2_HUMAN/tr|B4E1Q1|B4E1Q1_HUMAN/tr|E9PN89|E9PN89_HUMAN/tr|A0A024R6B5|A0A024R6B5_HUMAN/tr|E9PNE6|E9PNE6_HUMAN/tr|Q96IS6|Q96IS6_HUMAN		4.68	1		0	2	MASCOT		T
	R20180100087_1,23044	R.ARFEELNADLFR.G	1480.75	-0.00158	3	1	47.7	0	0.00423	0|0	sp|P54652|HSP72_HUMAN/sp|P11142|HSP7C_HUMAN/tr|V9HW22|V9HW22_HUMAN/tr|A8K7Q2|A8K7Q2_HUMAN/tr|Q53GZ6|Q53GZ6_HUMAN/tr|E9PKE3|E9PKE3_HUMAN/tr|B3KTV0|B3KTV0_HUMAN/tr|Q53HF2|Q53HF2_HUMAN/tr|B4E1Q1|B4E1Q1_HUMAN/tr|E9PN89|E9PN89_HUMAN/tr|A0A024R6B5|A0A024R6B5_HUMAN/tr|E9PNE6|E9PNE6_HUMAN/tr|Q96IS6|Q96IS6_HUMAN		4.68	1		0	2	MASCOT		T
	R20180100087_1,25500	R.FEELNADLFR.G ! K.FEELNADLFR.G	1253.62	-0.00059	2	1	34.67	0	0.0245	0|0	sp|P54652|HSP72_HUMAN/sp|P11142|HSP7C_HUMAN/tr|V9HW22|V9HW22_HUMAN/tr|A8K7Q2|A8K7Q2_HUMAN/tr|Q53GZ6|Q53GZ6_HUMAN/tr|E9PKE3|E9PKE3_HUMAN/tr|B3KTV0|B3KTV0_HUMAN/tr|Q53HF2|Q53HF2_HUMAN/tr|B4E1Q1|B4E1Q1_HUMAN/tr|E9PN89|E9PN89_HUMAN/tr|A0A024R6B5|A0A024R6B5_HUMAN/tr|E9PNE6|E9PNE6_HUMAN/tr|Q96IS6|Q96IS6_HUMAN ! tr|B3KUS2|B3KUS2_HUMAN		4.14	0		0	2	MASCOT		T
	R20180100087_1,7552	R.GTLDPVEK.A	858.457	-0.00118	2	1	23.14	0	0.33	0|0	sp|P11142|HSP7C_HUMAN/tr|V9HW22|V9HW22_HUMAN/tr|A8K7Q2|A8K7Q2_HUMAN/tr|Q53GZ6|Q53GZ6_HUMAN/tr|E9PKE3|E9PKE3_HUMAN/tr|B3KTV0|B3KTV0_HUMAN/tr|Q53HF2|Q53HF2_HUMAN/tr|B4E1Q1|B4E1Q1_HUMAN/tr|E9PN89|E9PN89_HUMAN/tr|E9PNE6|E9PNE6_HUMAN/tr|Q96IS6|Q96IS6_HUMAN		4.37	0		0	2	MASCOT		T
	R20180100087_1,32519	R.GVPQIEVTFDIDANGILNVSAVDK.S	2514.31	0.0115	2	1	68.54	0	2.88e-05	0|0	sp|P11142|HSP7C_HUMAN/tr|Q96H53|Q96H53_HUMAN/tr|V9HW22|V9HW22_HUMAN/tr|A8K7Q2|A8K7Q2_HUMAN/tr|Q53GZ6|Q53GZ6_HUMAN/tr|E9PKE3|E9PKE3_HUMAN/tr|Q96BE0|Q96BE0_HUMAN/tr|B3KTV0|B3KTV0_HUMAN/tr|E9PM13|E9PM13_HUMAN/tr|E9PS65|E9PS65_HUMAN/tr|B4E1Q1|B4E1Q1_HUMAN/tr|E9PNE6|E9PNE6_HUMAN/tr|Q96IS6|Q96IS6_HUMAN		3.84	0		0	2	MASCOT		T
	R20180100087_1,33447	R.GVPQIEVTFDIDANGILNVSAVDK.S	2514.31	-0.01293	3	1	34.98	0	0.0181	0|0	sp|P11142|HSP7C_HUMAN/tr|Q96H53|Q96H53_HUMAN/tr|V9HW22|V9HW22_HUMAN/tr|A8K7Q2|A8K7Q2_HUMAN/tr|Q53GZ6|Q53GZ6_HUMAN/tr|E9PKE3|E9PKE3_HUMAN/tr|Q96BE0|Q96BE0_HUMAN/tr|B3KTV0|B3KTV0_HUMAN/tr|E9PM13|E9PM13_HUMAN/tr|E9PS65|E9PS65_HUMAN/tr|B4E1Q1|B4E1Q1_HUMAN/tr|E9PNE6|E9PNE6_HUMAN/tr|Q96IS6|Q96IS6_HUMAN		3.84	0		0	2	MASCOT		T
	R20180100087_1,33750	R.GVPQIEVTFDIDANGILNVSAVDK.S	2514.31	-0.0069	2	1	65.53	0	1.66e-05	0|0	sp|P11142|HSP7C_HUMAN/tr|Q96H53|Q96H53_HUMAN/tr|V9HW22|V9HW22_HUMAN/tr|A8K7Q2|A8K7Q2_HUMAN/tr|Q53GZ6|Q53GZ6_HUMAN/tr|E9PKE3|E9PKE3_HUMAN/tr|Q96BE0|Q96BE0_HUMAN/tr|B3KTV0|B3KTV0_HUMAN/tr|E9PM13|E9PM13_HUMAN/tr|E9PS65|E9PS65_HUMAN/tr|B4E1Q1|B4E1Q1_HUMAN/tr|E9PNE6|E9PNE6_HUMAN/tr|Q96IS6|Q96IS6_HUMAN		3.84	0		0	2	MASCOT		T
	R20180100087_1,24625	R.IINEPTAAAIAYGLDK.R ! R.IINEPTAAAIAYGLDK.G ! R.IINEPTAAAIAYGLDK.K ! R.IINEPTAAAIAYGLDK.-	1659.9	-0.00047	2	1	99.77	0	8.11e-09	0|0	sp|P11021|GRP78_HUMAN/tr|V9HWB4|V9HWB4_HUMAN/tr|B4DEF7|B4DEF7_HUMAN ! sp|P34931|HS71L_HUMAN/tr|B4DI54|B4DI54_HUMAN/tr|Q53FA3|Q53FA3_HUMAN/tr|B2RCQ9|B2RCQ9_HUMAN/tr|A0A1U9X7X4|A0A1U9X7X4_HUMAN/tr|A0A1U9X7X9|A0A1U9X7X9_HUMAN/tr|A0A1U9X7W7|A0A1U9X7W7_HUMAN/tr|B4DXY3|B4DXY3_HUMAN ! sp|P54652|HSP72_HUMAN/sp|P11142|HSP7C_HUMAN/tr|V9HW22|V9HW22_HUMAN/tr|E9PKE3|E9PKE3_HUMAN/tr|B3KTV0|B3KTV0_HUMAN/tr|Q53H…		4.37	0		0	2	MASCOT		T
	R20180100087_1,25266	R.IINEPTAAAIAYGLDK.R ! R.IINEPTAAAIAYGLDK.G ! R.IINEPTAAAIAYGLDK.K ! R.IINEPTAAAIAYGLDK.-	1659.9	-0.00415	2	1	82.34	0	1.47e-06	0|0	sp|P11021|GRP78_HUMAN/tr|V9HWB4|V9HWB4_HUMAN/tr|B4DEF7|B4DEF7_HUMAN ! sp|P34931|HS71L_HUMAN/tr|B4DI54|B4DI54_HUMAN/tr|Q53FA3|Q53FA3_HUMAN/tr|B2RCQ9|B2RCQ9_HUMAN/tr|A0A1U9X7X4|A0A1U9X7X4_HUMAN/tr|A0A1U9X7X9|A0A1U9X7X9_HUMAN/tr|A0A1U9X7W7|A0A1U9X7W7_HUMAN/tr|B4DXY3|B4DXY3_HUMAN ! sp|P54652|HSP72_HUMAN/sp|P11142|HSP7C_HUMAN/tr|V9HW22|V9HW22_HUMAN/tr|E9PKE3|E9PKE3_HUMAN/tr|B3KTV0|B3KTV0_HUMAN/tr|Q53H…		4.37	0		0	2	MASCOT		T
	R20180100087_1,4465	R.LIGDAAK.N	687.404	-0.00022	2	1	35.46	0	0.0599	0|0	sp|P11021|GRP78_HUMAN/sp|P34931|HS71L_HUMAN/sp|P54652|HSP72_HUMAN/sp|P0DMV8|HS71A_HUMAN/sp|P0DMV9|HS71B_HUMAN/sp|P11142|HSP7C_HUMAN/tr|A0A0G2JIW1|A0A0G2JIW1_HUMAN/tr|V9HWB4|V9HWB4_HUMAN/tr|B4DNT8|B4DNT8_HUMAN/tr|B4DI54|B4DI54_HUMAN/tr|Q53FA3|Q53FA3_HUMAN/tr|V9HW22|V9HW22_HUMAN/tr|Q53GZ6|Q53GZ6_HUMAN/tr|B3KUS2|B3KUS2_HUMAN/tr|E9PKE3|E9PKE3_HUMAN/tr|B4DI39|B4DI39_HUMAN/tr|B2RCQ9|B2RCQ9_HUMAN/tr|B4D…		5.84	0		0	2	MASCOT		T
	R20180100087_1,8674	R.RFDDAVVQSDM*K.H	1426.66	0.00024	3	1	39.38	0	0.00537	0|0	sp|P11142|HSP7C_HUMAN/tr|V9HW22|V9HW22_HUMAN/tr|Q53GZ6|Q53GZ6_HUMAN/tr|E9PKE3|E9PKE3_HUMAN/tr|E9PN25|E9PN25_HUMAN/tr|E9PQQ4|E9PQQ4_HUMAN/tr|E9PPY6|E9PPY6_HUMAN/tr|Q53HF2|Q53HF2_HUMAN/tr|E9PK54|E9PK54_HUMAN/tr|E9PLF4|E9PLF4_HUMAN/tr|E9PN89|E9PN89_HUMAN/tr|A4D111|A4D111_HUMAN/tr|E9PNE6|E9PNE6_HUMAN/tr|E9PQK7|E9PQK7_HUMAN/tr|B4DTX2|B4DTX2_HUMAN/tr|Q96IS6|Q96IS6_HUMAN		4.43	1	15.994919 Oxidation (M)	0	2	MASCOT		T
	R20180100087_1,11612	R.RFDDAVVQSDMK.H	1410.67	-0.00193	2	1	52.9	0	0.000305	0|0	sp|P11142|HSP7C_HUMAN/tr|V9HW22|V9HW22_HUMAN/tr|Q53GZ6|Q53GZ6_HUMAN/tr|E9PKE3|E9PKE3_HUMAN/tr|E9PN25|E9PN25_HUMAN/tr|E9PQQ4|E9PQQ4_HUMAN/tr|E9PPY6|E9PPY6_HUMAN/tr|Q53HF2|Q53HF2_HUMAN/tr|E9PK54|E9PK54_HUMAN/tr|E9PLF4|E9PLF4_HUMAN/tr|E9PN89|E9PN89_HUMAN/tr|A4D111|A4D111_HUMAN/tr|E9PNE6|E9PNE6_HUMAN/tr|E9PQK7|E9PQK7_HUMAN/tr|B4DTX2|B4DTX2_HUMAN/tr|Q96IS6|Q96IS6_HUMAN		4.43	1		0	2	MASCOT		T
	R20180100087_1,12354	R.RFDDAVVQSDMK.H	1410.67	0.00199	2	1	39.21	0	0.00705	0|0	sp|P11142|HSP7C_HUMAN/tr|V9HW22|V9HW22_HUMAN/tr|Q53GZ6|Q53GZ6_HUMAN/tr|E9PKE3|E9PKE3_HUMAN/tr|E9PN25|E9PN25_HUMAN/tr|E9PQQ4|E9PQQ4_HUMAN/tr|E9PPY6|E9PPY6_HUMAN/tr|Q53HF2|Q53HF2_HUMAN/tr|E9PK54|E9PK54_HUMAN/tr|E9PLF4|E9PLF4_HUMAN/tr|E9PN89|E9PN89_HUMAN/tr|A4D111|A4D111_HUMAN/tr|E9PNE6|E9PNE6_HUMAN/tr|E9PQK7|E9PQK7_HUMAN/tr|B4DTX2|B4DTX2_HUMAN/tr|Q96IS6|Q96IS6_HUMAN		4.43	1		0	2	MASCOT		T
	R20180100087_1,825	R.TACER.A	636.277	5e-05	2	1	24	0	0.121	0|0	sp|P34931|HS71L_HUMAN/sp|P54652|HSP72_HUMAN/sp|P0DMV8|HS71A_HUMAN/sp|P48741|HSP77_HUMAN/sp|P0DMV9|HS71B_HUMAN/sp|P11142|HSP7C_HUMAN/sp|P17066|HSP76_HUMAN/tr|A0A0G2JIW1|A0A0G2JIW1_HUMAN/tr|V9GZ37|V9GZ37_HUMAN/tr|B4DVU9|B4DVU9_HUMAN/tr|B4DNT8|B4DNT8_HUMAN/tr|B4DI54|B4DI54_HUMAN/tr|Q53FA3|Q53FA3_HUMAN/tr|V9HW22|V9HW22_HUMAN/tr|A8K7Q2|A8K7Q2_HUMAN/tr|Q53GZ6|Q53GZ6_HUMAN/tr|E9PKE3|E9PKE3_HUMAN/tr|B4DI…		5.66	0		0	2	MASCOT		T
	R20180100087_1,32168	R.TLSSSTQASIEIDSLYEGIDFYTSITR.A	2997.46	0.00137	3	1	67.58	0	1.14e-05	0|0	sp|P11142|HSP7C_HUMAN/tr|V9HW22|V9HW22_HUMAN/tr|A8K7Q2|A8K7Q2_HUMAN/tr|Q53GZ6|Q53GZ6_HUMAN/tr|E9PKE3|E9PKE3_HUMAN/tr|B3KTV0|B3KTV0_HUMAN/tr|Q53HF2|Q53HF2_HUMAN/tr|B4E1Q1|B4E1Q1_HUMAN/tr|E9PN89|E9PN89_HUMAN/tr|E9PNE6|E9PNE6_HUMAN/tr|Q96IS6|Q96IS6_HUMAN		3.92	0		0	2	MASCOT		T
	R20180100087_1,32278	R.TLSSSTQASIEIDSLYEGIDFYTSITR.A	2997.46	0.0007	2	1	79.49	0	7.3e-07	0|0	sp|P11142|HSP7C_HUMAN/tr|V9HW22|V9HW22_HUMAN/tr|A8K7Q2|A8K7Q2_HUMAN/tr|Q53GZ6|Q53GZ6_HUMAN/tr|E9PKE3|E9PKE3_HUMAN/tr|B3KTV0|B3KTV0_HUMAN/tr|Q53HF2|Q53HF2_HUMAN/tr|B4E1Q1|B4E1Q1_HUMAN/tr|E9PN89|E9PN89_HUMAN/tr|E9PNE6|E9PNE6_HUMAN/tr|Q96IS6|Q96IS6_HUMAN		3.92	0		0	2	MASCOT		T
	R20180100087_1,33889	R.TLSSSTQASIEIDSLYEGIDFYTSITR.A	2997.46	0.00287	3	1	40.62	0	0.0056	0|0	sp|P11142|HSP7C_HUMAN/tr|V9HW22|V9HW22_HUMAN/tr|A8K7Q2|A8K7Q2_HUMAN/tr|Q53GZ6|Q53GZ6_HUMAN/tr|E9PKE3|E9PKE3_HUMAN/tr|B3KTV0|B3KTV0_HUMAN/tr|Q53HF2|Q53HF2_HUMAN/tr|B4E1Q1|B4E1Q1_HUMAN/tr|E9PN89|E9PN89_HUMAN/tr|E9PNE6|E9PNE6_HUMAN/tr|Q96IS6|Q96IS6_HUMAN		3.92	0		0	2	MASCOT		T
	R20180100087_1,34386	R.TLSSSTQASIEIDSLYEGIDFYTSITR.A	2997.46	-0.00769	3	1	52.73	0	0.000351	0|0	sp|P11142|HSP7C_HUMAN/tr|V9HW22|V9HW22_HUMAN/tr|A8K7Q2|A8K7Q2_HUMAN/tr|Q53GZ6|Q53GZ6_HUMAN/tr|E9PKE3|E9PKE3_HUMAN/tr|B3KTV0|B3KTV0_HUMAN/tr|Q53HF2|Q53HF2_HUMAN/tr|B4E1Q1|B4E1Q1_HUMAN/tr|E9PN89|E9PN89_HUMAN/tr|E9PNE6|E9PNE6_HUMAN/tr|Q96IS6|Q96IS6_HUMAN		3.92	0		0	2	MASCOT		T
	R20180100087_1,16330	R.TTPSYVAFTDTER.L	1487.7	-0.00065	2	1	75.47	0	1.47e-06	0|0	sp|P34931|HS71L_HUMAN/sp|P54652|HSP72_HUMAN/sp|P0DMV8|HS71A_HUMAN/sp|P48741|HSP77_HUMAN/sp|P0DMV9|HS71B_HUMAN/sp|P11142|HSP7C_HUMAN/sp|P17066|HSP76_HUMAN/tr|A0A0G2JIW1|A0A0G2JIW1_HUMAN/tr|B4DI54|B4DI54_HUMAN/tr|Q53FA3|Q53FA3_HUMAN/tr|V9HW22|V9HW22_HUMAN/tr|Q53GZ6|Q53GZ6_HUMAN/tr|B3KUS2|B3KUS2_HUMAN/tr|E9PKE3|E9PKE3_HUMAN/tr|B4DI39|B4DI39_HUMAN/tr|B2RCQ9|B2RCQ9_HUMAN/tr|B4DWK5|B4DWK5_HUMAN/tr|E9PN…		4.37	0		0	2	MASCOT		T
	R20180100087_1,17752	R.TTPSYVAFTDTER.L	1487.7	0.00287	2	1	72.91	0	2.56e-06	0|0	sp|P34931|HS71L_HUMAN/sp|P54652|HSP72_HUMAN/sp|P0DMV8|HS71A_HUMAN/sp|P48741|HSP77_HUMAN/sp|P0DMV9|HS71B_HUMAN/sp|P11142|HSP7C_HUMAN/sp|P17066|HSP76_HUMAN/tr|A0A0G2JIW1|A0A0G2JIW1_HUMAN/tr|B4DI54|B4DI54_HUMAN/tr|Q53FA3|Q53FA3_HUMAN/tr|V9HW22|V9HW22_HUMAN/tr|Q53GZ6|Q53GZ6_HUMAN/tr|B3KUS2|B3KUS2_HUMAN/tr|E9PKE3|E9PKE3_HUMAN/tr|B4DI39|B4DI39_HUMAN/tr|B2RCQ9|B2RCQ9_HUMAN/tr|B4DWK5|B4DWK5_HUMAN/tr|E9PN…		4.37	0		0	2	MASCOT		T
	R20180100087_1,8739	R.VEIIANDQGNR.I ! K.VEIIANDQGNR.T ! R.VEILANDQGNR.T	1228.63	-0.00032	2	1	40.87	0	0.00636	0|0	sp|P11021|GRP78_HUMAN/tr|V9HWB4|V9HWB4_HUMAN/tr|B4DEF7|B4DEF7_HUMAN ! sp|P34931|HS71L_HUMAN/sp|P54652|HSP72_HUMAN/sp|P0DMV8|HS71A_HUMAN/sp|P0DMV9|HS71B_HUMAN/sp|P11142|HSP7C_HUMAN/tr|A0A0G2JIW1|A0A0G2JIW1_HUMAN/tr|B4DVU9|B4DVU9_HUMAN/tr|B4DI54|B4DI54_HUMAN/tr|Q53FA3|Q53FA3_HUMAN/tr|V9HW22|V9HW22_HUMAN/tr|Q53GZ6|Q53GZ6_HUMAN/tr|B3KUS2|B3KUS2_HUMAN/tr|E9PKE3|E9PKE3_HUMAN/tr|B4DI39|B4DI39_HUMAN/tr|B…		4.37	0		0	2	MASCOT		T
	R20180100087_1,9315	R.VEIIANDQGNR.I ! K.VEIIANDQGNR.T ! R.VEILANDQGNR.T	1228.63	-0.00305	2	1	73.55	0	3.74e-06	0|0	sp|P11021|GRP78_HUMAN/tr|V9HWB4|V9HWB4_HUMAN/tr|B4DEF7|B4DEF7_HUMAN ! sp|P34931|HS71L_HUMAN/sp|P54652|HSP72_HUMAN/sp|P0DMV8|HS71A_HUMAN/sp|P0DMV9|HS71B_HUMAN/sp|P11142|HSP7C_HUMAN/tr|A0A0G2JIW1|A0A0G2JIW1_HUMAN/tr|B4DVU9|B4DVU9_HUMAN/tr|B4DI54|B4DI54_HUMAN/tr|Q53FA3|Q53FA3_HUMAN/tr|V9HW22|V9HW22_HUMAN/tr|Q53GZ6|Q53GZ6_HUMAN/tr|B3KUS2|B3KUS2_HUMAN/tr|E9PKE3|E9PKE3_HUMAN/tr|B4DI39|B4DI39_HUMAN/tr|B…		4.37	0		0	2	MASCOT		T
	R20180100087_1,9954	R.VEIIANDQGNR.I ! K.VEIIANDQGNR.T ! R.VEILANDQGNR.T	1228.63	-0.00071	2	1	45.92	0	0.00213	0|0	sp|P11021|GRP78_HUMAN/tr|V9HWB4|V9HWB4_HUMAN/tr|B4DEF7|B4DEF7_HUMAN ! sp|P34931|HS71L_HUMAN/sp|P54652|HSP72_HUMAN/sp|P0DMV8|HS71A_HUMAN/sp|P0DMV9|HS71B_HUMAN/sp|P11142|HSP7C_HUMAN/tr|A0A0G2JIW1|A0A0G2JIW1_HUMAN/tr|B4DVU9|B4DVU9_HUMAN/tr|B4DI54|B4DI54_HUMAN/tr|Q53FA3|Q53FA3_HUMAN/tr|V9HW22|V9HW22_HUMAN/tr|Q53GZ6|Q53GZ6_HUMAN/tr|B3KUS2|B3KUS2_HUMAN/tr|E9PKE3|E9PKE3_HUMAN/tr|B4DI39|B4DI39_HUMAN/tr|B…		4.37	0		0	2	MASCOT		T
	R20180100087_1,12060	R.VEIIANDQGNR.I ! K.VEIIANDQGNR.T ! R.VEILANDQGNR.T	1228.63	-0.00611	2	1	20.45	0	0.764	0|0	sp|P11021|GRP78_HUMAN/tr|V9HWB4|V9HWB4_HUMAN/tr|B4DEF7|B4DEF7_HUMAN ! sp|P34931|HS71L_HUMAN/sp|P54652|HSP72_HUMAN/sp|P0DMV8|HS71A_HUMAN/sp|P0DMV9|HS71B_HUMAN/sp|P11142|HSP7C_HUMAN/tr|A0A0G2JIW1|A0A0G2JIW1_HUMAN/tr|B4DVU9|B4DVU9_HUMAN/tr|B4DI54|B4DI54_HUMAN/tr|Q53FA3|Q53FA3_HUMAN/tr|V9HW22|V9HW22_HUMAN/tr|Q53GZ6|Q53GZ6_HUMAN/tr|B3KUS2|B3KUS2_HUMAN/tr|E9PKE3|E9PKE3_HUMAN/tr|B4DI39|B4DI39_HUMAN/tr|B…		4.37	0		0	2	MASCOT		T
$12-1	tr|A8K5I0|A8K5I0_HUMAN Epididymis secretory protein Li 103 OS=Homo sapiens GN=HSPA1B PE=2 SV=1	47	30	0.6911	70051.4	5.48
$12-2	tr|A0A0G2JIW1|A0A0G2JIW1_HUMAN Heat shock 70 kDa protein 1B OS=Homo sapiens GN=HSPA1B PE=1 SV=1	47	30	0.69	70108.4	5.48
$12-3	sp|P0DMV9|HS71B_HUMAN Heat shock 70 kDa protein 1B OS=Homo sapiens GN=HSPA1B PE=1 SV=1	47	30	0.6911	70051.4	5.48
$12-4	tr|A0A1U9X7W4|A0A1U9X7W4_HUMAN HSPA1A OS=Homo sapiens PE=3 SV=1	47	30	0.6911	70037.4	5.48
$12-5	sp|P0DMV8|HS71A_HUMAN Heat shock 70 kDa protein 1A OS=Homo sapiens GN=HSPA1A PE=1 SV=1	47	30	0.6911	70051.4	5.48
$12-6	tr|Q59EJ3|Q59EJ3_HUMAN Heat shock 70kDa protein 1A variant (Fragment) OS=Homo sapiens PE=2 SV=1	47	30	0.6248	77494.7	5.97
	R20180100087_1,26202	K.AAAIGIDLGTTYSCVGVFQHGK.V ! K.AAAIGIDLGTTYSCVGVFQHGK.G	2265.13	0.00233	2	1	89.85	0	8.07e-08	0|0	sp|P0DMV8|HS71A_HUMAN/sp|P0DMV9|HS71B_HUMAN/tr|A0A0G2JIW1|A0A0G2JIW1_HUMAN/tr|B4DVU9|B4DVU9_HUMAN/tr|B4DI39|B4DI39_HUMAN/tr|B4DWK5|B4DWK5_HUMAN/tr|B4E1S9|B4E1S9_HUMAN/tr|B4E1T6|B4E1T6_HUMAN/tr|Q59EJ3|Q59EJ3_HUMAN/tr|B4DNX1|B4DNX1_HUMAN/tr|B4DFN9|B4DFN9_HUMAN/tr|A0A1U9X7W4|A0A1U9X7W4_HUMAN/tr|A8K5I0|A8K5I0_HUMAN/tr|B4E388|B4E388_HUMAN/tr|B4DNV4|B4DNV4_HUMAN ! tr|V9GZ37|V9GZ37_HUMAN/tr|B3KTT5|B3KTT…		6.78	0		0	2	MASCOT		T
	R20180100087_1,27688	K.AFYPEEISSMVLTK.L ! K.AFYPEEISSMVLTK.M	1614.81	-0.00253	3	1	49.08	0	0.00179	0|0	sp|P34931|HS71L_HUMAN/tr|B4DI54|B4DI54_HUMAN/tr|Q53FA3|Q53FA3_HUMAN/tr|B2RCQ9|B2RCQ9_HUMAN/tr|A0A1U9X7X4|A0A1U9X7X4_HUMAN/tr|A0A1U9X7X9|A0A1U9X7X9_HUMAN/tr|A0A1U9X7W7|A0A1U9X7W7_HUMAN/tr|B4DXY3|B4DXY3_HUMAN ! sp|P0DMV8|HS71A_HUMAN/sp|P0DMV9|HS71B_HUMAN/tr|A0A0G2JIW1|A0A0G2JIW1_HUMAN/tr|B4DNT8|B4DNT8_HUMAN/tr|B4DI39|B4DI39_HUMAN/tr|B4DWK5|B4DWK5_HUMAN/tr|Q59EJ3|Q59EJ3_HUMAN/tr|Q9UQC1|Q9UQC1_HUMAN/…		4.53	0		0	2	MASCOT		T
	R20180100087_1,27747	K.AFYPEEISSMVLTK.L ! K.AFYPEEISSMVLTK.M	1614.81	-0.00016	2	1	43.88	0	0.00588	0|0	sp|P34931|HS71L_HUMAN/tr|B4DI54|B4DI54_HUMAN/tr|Q53FA3|Q53FA3_HUMAN/tr|B2RCQ9|B2RCQ9_HUMAN/tr|A0A1U9X7X4|A0A1U9X7X4_HUMAN/tr|A0A1U9X7X9|A0A1U9X7X9_HUMAN/tr|A0A1U9X7W7|A0A1U9X7W7_HUMAN/tr|B4DXY3|B4DXY3_HUMAN ! sp|P0DMV8|HS71A_HUMAN/sp|P0DMV9|HS71B_HUMAN/tr|A0A0G2JIW1|A0A0G2JIW1_HUMAN/tr|B4DNT8|B4DNT8_HUMAN/tr|B4DI39|B4DI39_HUMAN/tr|B4DWK5|B4DWK5_HUMAN/tr|Q59EJ3|Q59EJ3_HUMAN/tr|Q9UQC1|Q9UQC1_HUMAN/…		4.53	0		0	2	MASCOT		T
	R20180100087_1,17061	K.AQIHDLVLVGGSTR.I	1465.81	0.00057	3	1	20.14	0	0.565	0|0	sp|P0DMV8|HS71A_HUMAN/sp|P0DMV9|HS71B_HUMAN/tr|A0A0G2JIW1|A0A0G2JIW1_HUMAN/tr|V9GZ37|V9GZ37_HUMAN/tr|B4DVU9|B4DVU9_HUMAN/tr|B4DNT8|B4DNT8_HUMAN/tr|B4DI39|B4DI39_HUMAN/tr|B4DWK5|B4DWK5_HUMAN/tr|B4E1S9|B4E1S9_HUMAN/tr|Q59EJ3|Q59EJ3_HUMAN/tr|B3KTT5|B3KTT5_HUMAN/tr|B4DFN9|B4DFN9_HUMAN/tr|A0A1U9X7W4|A0A1U9X7W4_HUMAN/tr|A8K5I0|A8K5I0_HUMAN/tr|B4E388|B4E388_HUMAN		6.79	0		0	2	MASCOT		T
	R20180100087_1,10128	K.ATAGDTHLGGEDFDNR.L ! K.ATAGDTHLGGEDFDNR.Q	1675.73	-0.00057	3	1	35.02	0	0.0143	0|0	sp|P34931|HS71L_HUMAN/sp|P0DMV8|HS71A_HUMAN/sp|P48741|HSP77_HUMAN/sp|P0DMV9|HS71B_HUMAN/sp|P17066|HSP76_HUMAN/tr|A0A0G2JIW1|A0A0G2JIW1_HUMAN/tr|V9GZ37|V9GZ37_HUMAN/tr|B4DVU9|B4DVU9_HUMAN/tr|B4DNT8|B4DNT8_HUMAN/tr|B4DI54|B4DI54_HUMAN/tr|Q53FA3|Q53FA3_HUMAN/tr|B4DI39|B4DI39_HUMAN/tr|B2RCQ9|B2RCQ9_HUMAN/tr|B4DWK5|B4DWK5_HUMAN/tr|Q53FC7|Q53FC7_HUMAN/tr|B4DHP5|B4DHP5_HUMAN/tr|B4E1S9|B4E1S9_HUMAN/tr|B3…		4.22	0		0	2	MASCOT		T
	R20180100087_1,10137	K.ATAGDTHLGGEDFDNR.L ! K.ATAGDTHLGGEDFDNR.Q	1675.73	0.00026	2	1	54.67	0	7.32e-05	0|0	sp|P34931|HS71L_HUMAN/sp|P0DMV8|HS71A_HUMAN/sp|P48741|HSP77_HUMAN/sp|P0DMV9|HS71B_HUMAN/sp|P17066|HSP76_HUMAN/tr|A0A0G2JIW1|A0A0G2JIW1_HUMAN/tr|V9GZ37|V9GZ37_HUMAN/tr|B4DVU9|B4DVU9_HUMAN/tr|B4DNT8|B4DNT8_HUMAN/tr|B4DI54|B4DI54_HUMAN/tr|Q53FA3|Q53FA3_HUMAN/tr|B4DI39|B4DI39_HUMAN/tr|B2RCQ9|B2RCQ9_HUMAN/tr|B4DWK5|B4DWK5_HUMAN/tr|Q53FC7|Q53FC7_HUMAN/tr|B4DHP5|B4DHP5_HUMAN/tr|B4E1S9|B4E1S9_HUMAN/tr|B3…		4.22	0		0	2	MASCOT		T
	R20180100087_1,26613	K.CQEVISWLDANTLAEKDEFEHK.R	2662.25	-0.00276	4	1	48.05	0	0.000815	0|0	sp|P0DMV8|HS71A_HUMAN/sp|P0DMV9|HS71B_HUMAN/tr|A0A0G2JIW1|A0A0G2JIW1_HUMAN/tr|V9GZ37|V9GZ37_HUMAN/tr|B4DVU9|B4DVU9_HUMAN/tr|B4DNT8|B4DNT8_HUMAN/tr|B4DI39|B4DI39_HUMAN/tr|B4DWK5|B4DWK5_HUMAN/tr|B4E1S9|B4E1S9_HUMAN/tr|B4E1T6|B4E1T6_HUMAN/tr|Q59EJ3|Q59EJ3_HUMAN/tr|B3KTT5|B3KTT5_HUMAN/tr|B4DNX1|B4DNX1_HUMAN/tr|B4DFN9|B4DFN9_HUMAN/tr|A0A1U9X7W4|A0A1U9X7W4_HUMAN/tr|A8K5I0|A8K5I0_HUMAN/tr|B4E388|B4E388_…		4.35	1		0	2	MASCOT		T
	R20180100087_1,26615	K.CQEVISWLDANTLAEKDEFEHK.R	2662.25	-0.00184	3	1	61.12	0	3.99e-05	0|0	sp|P0DMV8|HS71A_HUMAN/sp|P0DMV9|HS71B_HUMAN/tr|A0A0G2JIW1|A0A0G2JIW1_HUMAN/tr|V9GZ37|V9GZ37_HUMAN/tr|B4DVU9|B4DVU9_HUMAN/tr|B4DNT8|B4DNT8_HUMAN/tr|B4DI39|B4DI39_HUMAN/tr|B4DWK5|B4DWK5_HUMAN/tr|B4E1S9|B4E1S9_HUMAN/tr|B4E1T6|B4E1T6_HUMAN/tr|Q59EJ3|Q59EJ3_HUMAN/tr|B3KTT5|B3KTT5_HUMAN/tr|B4DNX1|B4DNX1_HUMAN/tr|B4DFN9|B4DFN9_HUMAN/tr|A0A1U9X7W4|A0A1U9X7W4_HUMAN/tr|A8K5I0|A8K5I0_HUMAN/tr|B4E388|B4E388_…		4.35	1		0	2	MASCOT		T
	R20180100087_1,26645	K.CQEVISWLDANTLAEKDEFEHK.R	2662.25	0.0016	2	1	117.55	0	2.22e-10	0|0	sp|P0DMV8|HS71A_HUMAN/sp|P0DMV9|HS71B_HUMAN/tr|A0A0G2JIW1|A0A0G2JIW1_HUMAN/tr|V9GZ37|V9GZ37_HUMAN/tr|B4DVU9|B4DVU9_HUMAN/tr|B4DNT8|B4DNT8_HUMAN/tr|B4DI39|B4DI39_HUMAN/tr|B4DWK5|B4DWK5_HUMAN/tr|B4E1S9|B4E1S9_HUMAN/tr|B4E1T6|B4E1T6_HUMAN/tr|Q59EJ3|Q59EJ3_HUMAN/tr|B3KTT5|B3KTT5_HUMAN/tr|B4DNX1|B4DNX1_HUMAN/tr|B4DFN9|B4DFN9_HUMAN/tr|A0A1U9X7W4|A0A1U9X7W4_HUMAN/tr|A8K5I0|A8K5I0_HUMAN/tr|B4E388|B4E388_…		4.35	1		0	2	MASCOT		T
	R20180100087_1,25754	K.DAGVIAGLNVLR.I	1197.69	-0.00186	3	1	51.2	0	0.000561	0|0	sp|P34931|HS71L_HUMAN/sp|P0DMV8|HS71A_HUMAN/sp|P0DMV9|HS71B_HUMAN/tr|A0A0G2JIW1|A0A0G2JIW1_HUMAN/tr|B4DVU9|B4DVU9_HUMAN/tr|B4DNT8|B4DNT8_HUMAN/tr|B4DI54|B4DI54_HUMAN/tr|Q53FA3|Q53FA3_HUMAN/tr|B4DI39|B4DI39_HUMAN/tr|B2RCQ9|B2RCQ9_HUMAN/tr|B4DWK5|B4DWK5_HUMAN/tr|B4E1S9|B4E1S9_HUMAN/tr|A0A1U9X7X4|A0A1U9X7X4_HUMAN/tr|Q59EJ3|Q59EJ3_HUMAN/tr|Q9UQC1|Q9UQC1_HUMAN/tr|A0A1U9X7X9|A0A1U9X7X9_HUMAN/tr|A0A1U9X…		5.84	0		0	2	MASCOT		T
	R20180100087_1,25773	K.DAGVIAGLNVLR.I	1197.69	-0.00257	2	1	60.3	0	7.02e-05	0|0	sp|P34931|HS71L_HUMAN/sp|P0DMV8|HS71A_HUMAN/sp|P0DMV9|HS71B_HUMAN/tr|A0A0G2JIW1|A0A0G2JIW1_HUMAN/tr|B4DVU9|B4DVU9_HUMAN/tr|B4DNT8|B4DNT8_HUMAN/tr|B4DI54|B4DI54_HUMAN/tr|Q53FA3|Q53FA3_HUMAN/tr|B4DI39|B4DI39_HUMAN/tr|B2RCQ9|B2RCQ9_HUMAN/tr|B4DWK5|B4DWK5_HUMAN/tr|B4E1S9|B4E1S9_HUMAN/tr|A0A1U9X7X4|A0A1U9X7X4_HUMAN/tr|Q59EJ3|Q59EJ3_HUMAN/tr|Q9UQC1|Q9UQC1_HUMAN/tr|A0A1U9X7X9|A0A1U9X7X9_HUMAN/tr|A0A1U9X…		5.84	0		0	2	MASCOT		T
	R20180100087_1,29029	K.EIAEAYLGYPVTNAVITVPAYFNDSQR.Q	3001.49	0.00062	4	1	39.06	0	0.00883	0|0	sp|P0DMV8|HS71A_HUMAN/sp|P0DMV9|HS71B_HUMAN/tr|A0A0G2JIW1|A0A0G2JIW1_HUMAN/tr|B4DNT8|B4DNT8_HUMAN/tr|B4DWK5|B4DWK5_HUMAN/tr|B4E1S9|B4E1S9_HUMAN/tr|Q59EJ3|Q59EJ3_HUMAN/tr|Q9UQC1|Q9UQC1_HUMAN/tr|A0A1U9X7W4|A0A1U9X7W4_HUMAN/tr|A8K5I0|A8K5I0_HUMAN		4.14	0		0	2	MASCOT		T
	R20180100087_1,27579	K.ELEQVCNPIISGLYQGAGGPGPGGFGAQGPK.G	3055.49	-0.00138	3	1	113.52	0	2.53e-10	0|0	sp|P0DMV8|HS71A_HUMAN/sp|P0DMV9|HS71B_HUMAN/tr|A0A0G2JIW1|A0A0G2JIW1_HUMAN/tr|V9GZ37|V9GZ37_HUMAN/tr|B4DVU9|B4DVU9_HUMAN/tr|B4DNT8|B4DNT8_HUMAN/tr|B4DI39|B4DI39_HUMAN/tr|B4DWK5|B4DWK5_HUMAN/tr|B4E1S9|B4E1S9_HUMAN/tr|B4E1T6|B4E1T6_HUMAN/tr|Q59EJ3|Q59EJ3_HUMAN/tr|B3KTT5|B3KTT5_HUMAN/tr|B4DFN9|B4DFN9_HUMAN/tr|A0A1U9X7W4|A0A1U9X7W4_HUMAN/tr|A8K5I0|A8K5I0_HUMAN/tr|B4E388|B4E388_HUMAN		4.53	0		0	2	MASCOT		T
	R20180100087_1,27606	K.ELEQVCNPIISGLYQGAGGPGPGGFGAQGPK.G	3055.49	0.00124	4	1	83.39	0	2.6e-07	0|0	sp|P0DMV8|HS71A_HUMAN/sp|P0DMV9|HS71B_HUMAN/tr|A0A0G2JIW1|A0A0G2JIW1_HUMAN/tr|V9GZ37|V9GZ37_HUMAN/tr|B4DVU9|B4DVU9_HUMAN/tr|B4DNT8|B4DNT8_HUMAN/tr|B4DI39|B4DI39_HUMAN/tr|B4DWK5|B4DWK5_HUMAN/tr|B4E1S9|B4E1S9_HUMAN/tr|B4E1T6|B4E1T6_HUMAN/tr|Q59EJ3|Q59EJ3_HUMAN/tr|B3KTT5|B3KTT5_HUMAN/tr|B4DFN9|B4DFN9_HUMAN/tr|A0A1U9X7W4|A0A1U9X7W4_HUMAN/tr|A8K5I0|A8K5I0_HUMAN/tr|B4E388|B4E388_HUMAN		4.53	0		0	2	MASCOT		T
	R20180100087_1,14189	K.FGDPVVQSDMK.H	1222.58	0.00434	2	1	50.95	0	0.000409	0|0	sp|P0DMV8|HS71A_HUMAN/sp|P0DMV9|HS71B_HUMAN/tr|A0A0G2JIW1|A0A0G2JIW1_HUMAN/tr|B4DNT8|B4DNT8_HUMAN/tr|Q59EJ3|Q59EJ3_HUMAN/tr|B4DNX1|B4DNX1_HUMAN/tr|B4DFN9|B4DFN9_HUMAN/tr|A0A1U9X7W4|A0A1U9X7W4_HUMAN/tr|A8K5I0|A8K5I0_HUMAN/tr|B4E388|B4E388_HUMAN		4.21	0		0	2	MASCOT		T
	R20180100087_1,14322	K.FGDPVVQSDMK.H	1222.58	-0.02044	2	1	34.57	0	0.0268	0|0	sp|P0DMV8|HS71A_HUMAN/sp|P0DMV9|HS71B_HUMAN/tr|A0A0G2JIW1|A0A0G2JIW1_HUMAN/tr|B4DNT8|B4DNT8_HUMAN/tr|Q59EJ3|Q59EJ3_HUMAN/tr|B4DNX1|B4DNX1_HUMAN/tr|B4DFN9|B4DFN9_HUMAN/tr|A0A1U9X7W4|A0A1U9X7W4_HUMAN/tr|A8K5I0|A8K5I0_HUMAN/tr|B4E388|B4E388_HUMAN		4.21	0		0	2	MASCOT		T
	R20180100087_1,18578	K.HWPFQVINDGDKPK.V	1680.85	0.00371	2	1	22.61	0	1.34	0|0	sp|P0DMV8|HS71A_HUMAN/sp|P0DMV9|HS71B_HUMAN/tr|A0A0G2JIW1|A0A0G2JIW1_HUMAN/tr|B4DNT8|B4DNT8_HUMAN/tr|B4DI39|B4DI39_HUMAN/tr|B4DWK5|B4DWK5_HUMAN/tr|Q59EJ3|Q59EJ3_HUMAN/tr|Q9UQC1|Q9UQC1_HUMAN/tr|A0A1U9X7W4|A0A1U9X7W4_HUMAN/tr|A8K5I0|A8K5I0_HUMAN		6.75	0		0	2	MASCOT		T
	R20180100087_1,4454	K.ITITNDKGR.L	1017.57	0.00076	2	1	38.57	0	0.0137	0|0	sp|P34931|HS71L_HUMAN/sp|P54652|HSP72_HUMAN/sp|P0DMV8|HS71A_HUMAN/sp|P0DMV9|HS71B_HUMAN/sp|P11142|HSP7C_HUMAN/sp|P17066|HSP76_HUMAN/tr|A0A0G2JIW1|A0A0G2JIW1_HUMAN/tr|V9GZ37|V9GZ37_HUMAN/tr|B4DVU9|B4DVU9_HUMAN/tr|Q96H53|Q96H53_HUMAN/tr|B4DNT8|B4DNT8_HUMAN/tr|B4DI54|B4DI54_HUMAN/tr|Q53FA3|Q53FA3_HUMAN/tr|V9HW22|V9HW22_HUMAN/tr|A8K7Q2|A8K7Q2_HUMAN/tr|Q53GZ6|Q53GZ6_HUMAN/tr|B3KUS2|B3KUS2_HUMAN/tr|E9P…		8.75	1		0	2	MASCOT		T
	R20180100087_1,4482	K.ITITNDKGR.L	1017.57	0.00126	3	1	22.31	0	0.61	0|0	sp|P34931|HS71L_HUMAN/sp|P54652|HSP72_HUMAN/sp|P0DMV8|HS71A_HUMAN/sp|P0DMV9|HS71B_HUMAN/sp|P11142|HSP7C_HUMAN/sp|P17066|HSP76_HUMAN/tr|A0A0G2JIW1|A0A0G2JIW1_HUMAN/tr|V9GZ37|V9GZ37_HUMAN/tr|B4DVU9|B4DVU9_HUMAN/tr|Q96H53|Q96H53_HUMAN/tr|B4DNT8|B4DNT8_HUMAN/tr|B4DI54|B4DI54_HUMAN/tr|Q53FA3|Q53FA3_HUMAN/tr|V9HW22|V9HW22_HUMAN/tr|A8K7Q2|A8K7Q2_HUMAN/tr|Q53GZ6|Q53GZ6_HUMAN/tr|B3KUS2|B3KUS2_HUMAN/tr|E9P…		8.75	1		0	2	MASCOT		T
	R20180100087_1,23745	K.LLQDFFNGR.D	1109.57	-0.00092	2	1	52.52	0	0.000405	0|0	sp|P0DMV8|HS71A_HUMAN/sp|P0DMV9|HS71B_HUMAN/tr|A0A0G2JIW1|A0A0G2JIW1_HUMAN/tr|V9GZ37|V9GZ37_HUMAN/tr|B4DVU9|B4DVU9_HUMAN/tr|B4DNT8|B4DNT8_HUMAN/tr|B4DI39|B4DI39_HUMAN/tr|B4DWK5|B4DWK5_HUMAN/tr|B4E1S9|B4E1S9_HUMAN/tr|B4E1T6|B4E1T6_HUMAN/tr|Q59EJ3|Q59EJ3_HUMAN/tr|B3KTT5|B3KTT5_HUMAN/tr|B4DNX1|B4DNX1_HUMAN/tr|B4DFN9|B4DFN9_HUMAN/tr|A0A1U9X7W4|A0A1U9X7W4_HUMAN/tr|A8K5I0|A8K5I0_HUMAN/tr|B4E388|B4E388_…		5.84	0		0	2	MASCOT		T
	R20180100087_1,18701	K.NQVALNPQNTVFDAK.R	1658.85	-0.00603	2	1	59.12	0	9.42e-05	0|0	sp|P0DMV8|HS71A_HUMAN/sp|P0DMV9|HS71B_HUMAN/tr|A0A0G2JIW1|A0A0G2JIW1_HUMAN/tr|B4DNT8|B4DNT8_HUMAN/tr|B4E1T6|B4E1T6_HUMAN/tr|Q59EJ3|Q59EJ3_HUMAN/tr|B4DNX1|B4DNX1_HUMAN/tr|B4DFN9|B4DFN9_HUMAN/tr|A0A1U9X7W4|A0A1U9X7W4_HUMAN/tr|A8K5I0|A8K5I0_HUMAN/tr|B4E388|B4E388_HUMAN		5.84	0		0	2	MASCOT		T
	R20180100087_1,27457	K.QTQIFTTYSDNQPGVLIQVYEGER.A	2786.36	0.00077	2	1	107.11	0	1.51e-09	0|0	sp|P34931|HS71L_HUMAN/sp|P0DMV8|HS71A_HUMAN/sp|P0DMV9|HS71B_HUMAN/tr|A0A0G2JIW1|A0A0G2JIW1_HUMAN/tr|V9GZ37|V9GZ37_HUMAN/tr|B4DVU9|B4DVU9_HUMAN/tr|B4DNT8|B4DNT8_HUMAN/tr|B4DI54|B4DI54_HUMAN/tr|Q53FA3|Q53FA3_HUMAN/tr|B4DI39|B4DI39_HUMAN/tr|B2RCQ9|B2RCQ9_HUMAN/tr|B4DWK5|B4DWK5_HUMAN/tr|B4E1S9|B4E1S9_HUMAN/tr|A0A1U9X7X4|A0A1U9X7X4_HUMAN/tr|B4E1T6|B4E1T6_HUMAN/tr|Q59EJ3|Q59EJ3_HUMAN/tr|B3KTT5|B3KTT5_H…		4.14	0		0	2	MASCOT		T
	R20180100087_1,6299	K.SAVEDEGLK.G	947.468	0.00088	2	1	70.79	0	5.91e-06	0|0	sp|P0DMV8|HS71A_HUMAN/sp|P0DMV9|HS71B_HUMAN/tr|A0A0G2JIW1|A0A0G2JIW1_HUMAN/tr|V9GZ37|V9GZ37_HUMAN/tr|B4DVU9|B4DVU9_HUMAN/tr|B4DNT8|B4DNT8_HUMAN/tr|B4DI39|B4DI39_HUMAN/tr|B4DWK5|B4DWK5_HUMAN/tr|B4E1S9|B4E1S9_HUMAN/tr|B4E1T6|B4E1T6_HUMAN/tr|Q59EJ3|Q59EJ3_HUMAN/tr|B3KTT5|B3KTT5_HUMAN/tr|B4DNX1|B4DNX1_HUMAN/tr|B4DFN9|B4DFN9_HUMAN/tr|A0A1U9X7W4|A0A1U9X7W4_HUMAN/tr|A8K5I0|A8K5I0_HUMAN/tr|B4E388|B4E388_…		4.14	0		0	2	MASCOT		T
	R20180100087_1,32907	K.SENVQDLLLLDVAPLSLGLETAGGVMTALIK.R	3180.74	-0.00184	3	1	77.6	0	3.35e-07	0|0	sp|P0DMV8|HS71A_HUMAN/sp|P0DMV9|HS71B_HUMAN/tr|A0A0G2JIW1|A0A0G2JIW1_HUMAN/tr|V9GZ37|V9GZ37_HUMAN/tr|B4DVU9|B4DVU9_HUMAN/tr|B4DNT8|B4DNT8_HUMAN/tr|B4DI39|B4DI39_HUMAN/tr|B4DWK5|B4DWK5_HUMAN/tr|B4E1S9|B4E1S9_HUMAN/tr|B4E1T6|B4E1T6_HUMAN/tr|Q59EJ3|Q59EJ3_HUMAN/tr|B3KTT5|B3KTT5_HUMAN/tr|B4DNX1|B4DNX1_HUMAN/tr|B4DFN9|B4DFN9_HUMAN/tr|A0A1U9X7W4|A0A1U9X7W4_HUMAN/tr|A8K5I0|A8K5I0_HUMAN/tr|B4E388|B4E388_…		3.92	0		0	2	MASCOT		T
	R20180100087_1,28821	K.SINPDEAVAYGAAVQAAILM*GDK.S	2320.15	0.00878	2	1	86.68	0	1.64e-07	0|0	sp|P34931|HS71L_HUMAN/sp|P0DMV8|HS71A_HUMAN/sp|P0DMV9|HS71B_HUMAN/tr|A0A0G2JIW1|A0A0G2JIW1_HUMAN/tr|V9GZ37|V9GZ37_HUMAN/tr|B4DVU9|B4DVU9_HUMAN/tr|B4DNT8|B4DNT8_HUMAN/tr|B4DI54|B4DI54_HUMAN/tr|Q53FA3|Q53FA3_HUMAN/tr|B4DI39|B4DI39_HUMAN/tr|B4DWK5|B4DWK5_HUMAN/tr|B4E1S9|B4E1S9_HUMAN/tr|A0A1U9X7X4|A0A1U9X7X4_HUMAN/tr|B4E1T6|B4E1T6_HUMAN/tr|Q59EJ3|Q59EJ3_HUMAN/tr|B3KTT5|B3KTT5_HUMAN/tr|B4DNX1|B4DNX1_H…		4.03	0	15.994919 Oxidation (M)	0	2	MASCOT		T
	R20180100087_1,30999	K.SINPDEAVAYGAAVQAAILMGDK.S	2304.15	-0.00724	2	1	26.47	0	0.187	0|0	sp|P34931|HS71L_HUMAN/sp|P0DMV8|HS71A_HUMAN/sp|P0DMV9|HS71B_HUMAN/tr|A0A0G2JIW1|A0A0G2JIW1_HUMAN/tr|V9GZ37|V9GZ37_HUMAN/tr|B4DVU9|B4DVU9_HUMAN/tr|B4DNT8|B4DNT8_HUMAN/tr|B4DI54|B4DI54_HUMAN/tr|Q53FA3|Q53FA3_HUMAN/tr|B4DI39|B4DI39_HUMAN/tr|B4DWK5|B4DWK5_HUMAN/tr|B4E1S9|B4E1S9_HUMAN/tr|A0A1U9X7X4|A0A1U9X7X4_HUMAN/tr|B4E1T6|B4E1T6_HUMAN/tr|Q59EJ3|Q59EJ3_HUMAN/tr|B3KTT5|B3KTT5_HUMAN/tr|B4DNX1|B4DNX1_H…		4.03	0		0	2	MASCOT		T
	R20180100087_1,24729	R.FEELCSDLFR.S	1315.6	-0.00062	2	1	69.16	0	3.59e-06	0|0	sp|P0DMV8|HS71A_HUMAN/sp|P48741|HSP77_HUMAN/sp|P0DMV9|HS71B_HUMAN/sp|P17066|HSP76_HUMAN/tr|A0A0G2JIW1|A0A0G2JIW1_HUMAN/tr|V9GZ37|V9GZ37_HUMAN/tr|B4DVU9|B4DVU9_HUMAN/tr|B4DNT8|B4DNT8_HUMAN/tr|B4DI39|B4DI39_HUMAN/tr|B4DWK5|B4DWK5_HUMAN/tr|Q53FC7|Q53FC7_HUMAN/tr|B4DHP5|B4DHP5_HUMAN/tr|B4E1S9|B4E1S9_HUMAN/tr|B3KSM6|B3KSM6_HUMAN/tr|Q59EJ3|Q59EJ3_HUMAN/tr|B3KTT5|B3KTT5_HUMAN/tr|B4DFN9|B4DFN9_HUMAN/tr|A…		4.14	0		0	2	MASCOT		T
	R20180100087_1,33720	R.GVPQIEVTFDIDANGILNVTATDK.S	2530.3	0.00027	3	1	20.75	0	0.593	0|0	sp|P34931|HS71L_HUMAN/sp|P0DMV8|HS71A_HUMAN/sp|P0DMV9|HS71B_HUMAN/tr|A0A0G2JIW1|A0A0G2JIW1_HUMAN/tr|V9GZ37|V9GZ37_HUMAN/tr|B4DVU9|B4DVU9_HUMAN/tr|B4DNT8|B4DNT8_HUMAN/tr|B4DI39|B4DI39_HUMAN/tr|B2RCQ9|B2RCQ9_HUMAN/tr|B4DWK5|B4DWK5_HUMAN/tr|B4E1S9|B4E1S9_HUMAN/tr|B4E1T6|B4E1T6_HUMAN/tr|Q59EJ3|Q59EJ3_HUMAN/tr|B3KTT5|B3KTT5_HUMAN/tr|B4DNX1|B4DNX1_HUMAN/tr|B4DFN9|B4DFN9_HUMAN/tr|A0A1U9X7W4|A0A1U9X7W4_H…		3.84	0		0	2	MASCOT		T
	R20180100087_1,24942	R.IINEPTAAAIAYGLDR.T ! R.IINEPTAAAIAYGLDR.R	1687.9	0.00071	2	1	84.43	0	3.04e-07	0|0	sp|P0DMV8|HS71A_HUMAN/sp|P0DMV9|HS71B_HUMAN/tr|A0A0G2JIW1|A0A0G2JIW1_HUMAN/tr|B4DVU9|B4DVU9_HUMAN/tr|B4DNT8|B4DNT8_HUMAN/tr|B4DI39|B4DI39_HUMAN/tr|B4DWK5|B4DWK5_HUMAN/tr|B4E1S9|B4E1S9_HUMAN/tr|Q59EJ3|Q59EJ3_HUMAN/tr|Q9UQC1|Q9UQC1_HUMAN/tr|B4DFN9|B4DFN9_HUMAN/tr|A0A1U9X7W4|A0A1U9X7W4_HUMAN/tr|A8K5I0|A8K5I0_HUMAN ! sp|P17066|HSP76_HUMAN/tr|Q53FC7|Q53FC7_HUMAN/tr|B4DHP5|B4DHP5_HUMAN/tr|B3KSM6|B3KSM6…		4.37	0		0	2	MASCOT		T
	R20180100087_1,24966	R.IINEPTAAAIAYGLDR.T ! R.IINEPTAAAIAYGLDR.R	1687.9	-0.00105	3	1	67.87	0	1.38e-05	0|0	sp|P0DMV8|HS71A_HUMAN/sp|P0DMV9|HS71B_HUMAN/tr|A0A0G2JIW1|A0A0G2JIW1_HUMAN/tr|B4DVU9|B4DVU9_HUMAN/tr|B4DNT8|B4DNT8_HUMAN/tr|B4DI39|B4DI39_HUMAN/tr|B4DWK5|B4DWK5_HUMAN/tr|B4E1S9|B4E1S9_HUMAN/tr|Q59EJ3|Q59EJ3_HUMAN/tr|Q9UQC1|Q9UQC1_HUMAN/tr|B4DFN9|B4DFN9_HUMAN/tr|A0A1U9X7W4|A0A1U9X7W4_HUMAN/tr|A8K5I0|A8K5I0_HUMAN ! sp|P17066|HSP76_HUMAN/tr|Q53FC7|Q53FC7_HUMAN/tr|B4DHP5|B4DHP5_HUMAN/tr|B3KSM6|B3KSM6…		4.37	0		0	2	MASCOT		T
	R20180100087_1,8577	R.KFGDPVVQSDM*K.H	1366.67	2e-05	2	1	44.64	0	0.0021	0|0	sp|P0DMV8|HS71A_HUMAN/sp|P0DMV9|HS71B_HUMAN/tr|A0A0G2JIW1|A0A0G2JIW1_HUMAN/tr|B4DNT8|B4DNT8_HUMAN/tr|Q59EJ3|Q59EJ3_HUMAN/tr|B4DNX1|B4DNX1_HUMAN/tr|B4DFN9|B4DFN9_HUMAN/tr|A0A1U9X7W4|A0A1U9X7W4_HUMAN/tr|A8K5I0|A8K5I0_HUMAN/tr|B4E388|B4E388_HUMAN		5.96	1	15.994919 Oxidation (M)	0	2	MASCOT		T
	R20180100087_1,11793	R.KFGDPVVQSDMK.H	1350.67	0.0028	2	1	52.07	0	0.000558	0|0	sp|P0DMV8|HS71A_HUMAN/sp|P0DMV9|HS71B_HUMAN/tr|A0A0G2JIW1|A0A0G2JIW1_HUMAN/tr|B4DNT8|B4DNT8_HUMAN/tr|Q59EJ3|Q59EJ3_HUMAN/tr|B4DNX1|B4DNX1_HUMAN/tr|B4DFN9|B4DFN9_HUMAN/tr|A0A1U9X7W4|A0A1U9X7W4_HUMAN/tr|A8K5I0|A8K5I0_HUMAN/tr|B4E388|B4E388_HUMAN		5.96	1		0	2	MASCOT		T
	R20180100087_1,4465	R.LIGDAAK.N	687.404	-0.00022	2	1	35.46	0	0.0599	0|0	sp|P11021|GRP78_HUMAN/sp|P34931|HS71L_HUMAN/sp|P54652|HSP72_HUMAN/sp|P0DMV8|HS71A_HUMAN/sp|P0DMV9|HS71B_HUMAN/sp|P11142|HSP7C_HUMAN/tr|A0A0G2JIW1|A0A0G2JIW1_HUMAN/tr|V9HWB4|V9HWB4_HUMAN/tr|B4DNT8|B4DNT8_HUMAN/tr|B4DI54|B4DI54_HUMAN/tr|Q53FA3|Q53FA3_HUMAN/tr|V9HW22|V9HW22_HUMAN/tr|Q53GZ6|Q53GZ6_HUMAN/tr|B3KUS2|B3KUS2_HUMAN/tr|E9PKE3|E9PKE3_HUMAN/tr|B4DI39|B4DI39_HUMAN/tr|B2RCQ9|B2RCQ9_HUMAN/tr|B4D…		5.84	0		0	2	MASCOT		T
	R20180100087_1,17116	R.LVNHFVEEFK.R	1261.66	0.00148	3	1	30.96	0	0.0719	0|0	sp|P0DMV8|HS71A_HUMAN/sp|P0DMV9|HS71B_HUMAN/tr|A0A0G2JIW1|A0A0G2JIW1_HUMAN/tr|V9GZ37|V9GZ37_HUMAN/tr|B4DVU9|B4DVU9_HUMAN/tr|B4DNT8|B4DNT8_HUMAN/tr|B4DI39|B4DI39_HUMAN/tr|B4DWK5|B4DWK5_HUMAN/tr|B4E1S9|B4E1S9_HUMAN/tr|Q59EJ3|Q59EJ3_HUMAN/tr|B3KTT5|B3KTT5_HUMAN/tr|B4DFN9|B4DFN9_HUMAN/tr|A0A1U9X7W4|A0A1U9X7W4_HUMAN/tr|A8K5I0|A8K5I0_HUMAN/tr|B4E388|B4E388_HUMAN/tr|B4DNV4|B4DNV4_HUMAN		5.4	0		0	2	MASCOT		T
	R20180100087_1,14925	R.LVNHFVEEFKR.K	1417.76	0.00343	3	1	37.95	0	0.0155	0|0	sp|P0DMV8|HS71A_HUMAN/sp|P0DMV9|HS71B_HUMAN/tr|A0A0G2JIW1|A0A0G2JIW1_HUMAN/tr|V9GZ37|V9GZ37_HUMAN/tr|B4DVU9|B4DVU9_HUMAN/tr|B4DNT8|B4DNT8_HUMAN/tr|B4DI39|B4DI39_HUMAN/tr|B4DWK5|B4DWK5_HUMAN/tr|B4E1S9|B4E1S9_HUMAN/tr|Q59EJ3|Q59EJ3_HUMAN/tr|B3KTT5|B3KTT5_HUMAN/tr|B4DFN9|B4DFN9_HUMAN/tr|A0A1U9X7W4|A0A1U9X7W4_HUMAN/tr|A8K5I0|A8K5I0_HUMAN/tr|B4E388|B4E388_HUMAN/tr|B4DNV4|B4DNV4_HUMAN		6.76	1		0	2	MASCOT		T
	R20180100087_1,14929	R.LVNHFVEEFKR.K	1417.76	0.00164	4	1	45.86	0	0.00244	0|0	sp|P0DMV8|HS71A_HUMAN/sp|P0DMV9|HS71B_HUMAN/tr|A0A0G2JIW1|A0A0G2JIW1_HUMAN/tr|V9GZ37|V9GZ37_HUMAN/tr|B4DVU9|B4DVU9_HUMAN/tr|B4DNT8|B4DNT8_HUMAN/tr|B4DI39|B4DI39_HUMAN/tr|B4DWK5|B4DWK5_HUMAN/tr|B4E1S9|B4E1S9_HUMAN/tr|Q59EJ3|Q59EJ3_HUMAN/tr|B3KTT5|B3KTT5_HUMAN/tr|B4DFN9|B4DFN9_HUMAN/tr|A0A1U9X7W4|A0A1U9X7W4_HUMAN/tr|A8K5I0|A8K5I0_HUMAN/tr|B4E388|B4E388_HUMAN/tr|B4DNV4|B4DNV4_HUMAN		6.76	1		0	2	MASCOT		T
	R20180100087_1,3778	R.NSTIPTK.Q	760.42	0.00091	2	1	63.44	0	0.000366	0|0	sp|P34931|HS71L_HUMAN/sp|P0DMV8|HS71A_HUMAN/sp|P0DMV9|HS71B_HUMAN/tr|A0A0G2JIW1|A0A0G2JIW1_HUMAN/tr|V9GZ37|V9GZ37_HUMAN/tr|B4DVU9|B4DVU9_HUMAN/tr|B4DNT8|B4DNT8_HUMAN/tr|B4DI54|B4DI54_HUMAN/tr|Q53FA3|Q53FA3_HUMAN/tr|B4DI39|B4DI39_HUMAN/tr|B2RCQ9|B2RCQ9_HUMAN/tr|B4DWK5|B4DWK5_HUMAN/tr|B4E1S9|B4E1S9_HUMAN/tr|A0A1U9X7X4|A0A1U9X7X4_HUMAN/tr|B4E1T6|B4E1T6_HUMAN/tr|Q59EJ3|Q59EJ3_HUMAN/tr|B3KTT5|B3KTT5_H…		8.75	0		0	2	MASCOT		T
	R20180100087_1,6568	R.STLEPVEK.A	902.483	0.00062	2	1	41.06	0	0.0126	0|0	sp|P0DMV8|HS71A_HUMAN/sp|P48741|HSP77_HUMAN/sp|P0DMV9|HS71B_HUMAN/sp|P17066|HSP76_HUMAN/tr|A0A0G2JIW1|A0A0G2JIW1_HUMAN/tr|V9GZ37|V9GZ37_HUMAN/tr|B4DVU9|B4DVU9_HUMAN/tr|B4DNT8|B4DNT8_HUMAN/tr|B4DI39|B4DI39_HUMAN/tr|B4DWK5|B4DWK5_HUMAN/tr|Q53FC7|Q53FC7_HUMAN/tr|B4DHP5|B4DHP5_HUMAN/tr|B4E1S9|B4E1S9_HUMAN/tr|B3KSM6|B3KSM6_HUMAN/tr|Q59EJ3|Q59EJ3_HUMAN/tr|B3KTT5|B3KTT5_HUMAN/tr|B4DFN9|B4DFN9_HUMAN/tr|A…		4.53	0		0	2	MASCOT		T
	R20180100087_1,825	R.TACER.A	636.277	5e-05	2	1	24	0	0.121	0|0	sp|P34931|HS71L_HUMAN/sp|P54652|HSP72_HUMAN/sp|P0DMV8|HS71A_HUMAN/sp|P48741|HSP77_HUMAN/sp|P0DMV9|HS71B_HUMAN/sp|P11142|HSP7C_HUMAN/sp|P17066|HSP76_HUMAN/tr|A0A0G2JIW1|A0A0G2JIW1_HUMAN/tr|V9GZ37|V9GZ37_HUMAN/tr|B4DVU9|B4DVU9_HUMAN/tr|B4DNT8|B4DNT8_HUMAN/tr|B4DI54|B4DI54_HUMAN/tr|Q53FA3|Q53FA3_HUMAN/tr|V9HW22|V9HW22_HUMAN/tr|A8K7Q2|A8K7Q2_HUMAN/tr|Q53GZ6|Q53GZ6_HUMAN/tr|E9PKE3|E9PKE3_HUMAN/tr|B4DI…		5.66	0		0	2	MASCOT		T
	R20180100087_1,32608	R.TLSSSTQASLEIDSLFEGIDFYTSITR.A	2981.46	-0.03425	3	1	28.49	0	0.328	0|0	sp|P0DMV8|HS71A_HUMAN/sp|P0DMV9|HS71B_HUMAN/tr|A0A0G2JIW1|A0A0G2JIW1_HUMAN/tr|V9GZ37|V9GZ37_HUMAN/tr|B4DNT8|B4DNT8_HUMAN/tr|B4DI39|B4DI39_HUMAN/tr|B4DWK5|B4DWK5_HUMAN/tr|B4E1S9|B4E1S9_HUMAN/tr|Q59EJ3|Q59EJ3_HUMAN/tr|B3KTT5|B3KTT5_HUMAN/tr|B4DFN9|B4DFN9_HUMAN/tr|A0A1U9X7W4|A0A1U9X7W4_HUMAN/tr|A8K5I0|A8K5I0_HUMAN/tr|B4E388|B4E388_HUMAN/tr|B4DNV4|B4DNV4_HUMAN		3.92	0		0	2	MASCOT		T
	R20180100087_1,33223	R.TLSSSTQASLEIDSLFEGIDFYTSITR.A	2981.46	-0.03725	3	1	27.43	0	0.392	0|0	sp|P0DMV8|HS71A_HUMAN/sp|P0DMV9|HS71B_HUMAN/tr|A0A0G2JIW1|A0A0G2JIW1_HUMAN/tr|V9GZ37|V9GZ37_HUMAN/tr|B4DNT8|B4DNT8_HUMAN/tr|B4DI39|B4DI39_HUMAN/tr|B4DWK5|B4DWK5_HUMAN/tr|B4E1S9|B4E1S9_HUMAN/tr|Q59EJ3|Q59EJ3_HUMAN/tr|B3KTT5|B3KTT5_HUMAN/tr|B4DFN9|B4DFN9_HUMAN/tr|A0A1U9X7W4|A0A1U9X7W4_HUMAN/tr|A8K5I0|A8K5I0_HUMAN/tr|B4E388|B4E388_HUMAN/tr|B4DNV4|B4DNV4_HUMAN		3.92	0		0	2	MASCOT		T
	R20180100087_1,16330	R.TTPSYVAFTDTER.L	1487.7	-0.00065	2	1	75.47	0	1.47e-06	0|0	sp|P34931|HS71L_HUMAN/sp|P54652|HSP72_HUMAN/sp|P0DMV8|HS71A_HUMAN/sp|P48741|HSP77_HUMAN/sp|P0DMV9|HS71B_HUMAN/sp|P11142|HSP7C_HUMAN/sp|P17066|HSP76_HUMAN/tr|A0A0G2JIW1|A0A0G2JIW1_HUMAN/tr|B4DI54|B4DI54_HUMAN/tr|Q53FA3|Q53FA3_HUMAN/tr|V9HW22|V9HW22_HUMAN/tr|Q53GZ6|Q53GZ6_HUMAN/tr|B3KUS2|B3KUS2_HUMAN/tr|E9PKE3|E9PKE3_HUMAN/tr|B4DI39|B4DI39_HUMAN/tr|B2RCQ9|B2RCQ9_HUMAN/tr|B4DWK5|B4DWK5_HUMAN/tr|E9PN…		4.37	0		0	2	MASCOT		T
	R20180100087_1,17752	R.TTPSYVAFTDTER.L	1487.7	0.00287	2	1	72.91	0	2.56e-06	0|0	sp|P34931|HS71L_HUMAN/sp|P54652|HSP72_HUMAN/sp|P0DMV8|HS71A_HUMAN/sp|P48741|HSP77_HUMAN/sp|P0DMV9|HS71B_HUMAN/sp|P11142|HSP7C_HUMAN/sp|P17066|HSP76_HUMAN/tr|A0A0G2JIW1|A0A0G2JIW1_HUMAN/tr|B4DI54|B4DI54_HUMAN/tr|Q53FA3|Q53FA3_HUMAN/tr|V9HW22|V9HW22_HUMAN/tr|Q53GZ6|Q53GZ6_HUMAN/tr|B3KUS2|B3KUS2_HUMAN/tr|E9PKE3|E9PKE3_HUMAN/tr|B4DI39|B4DI39_HUMAN/tr|B2RCQ9|B2RCQ9_HUMAN/tr|B4DWK5|B4DWK5_HUMAN/tr|E9PN…		4.37	0		0	2	MASCOT		T
	R20180100087_1,8739	R.VEIIANDQGNR.I ! K.VEIIANDQGNR.T ! R.VEILANDQGNR.T	1228.63	-0.00032	2	1	40.87	0	0.00636	0|0	sp|P11021|GRP78_HUMAN/tr|V9HWB4|V9HWB4_HUMAN/tr|B4DEF7|B4DEF7_HUMAN ! sp|P34931|HS71L_HUMAN/sp|P54652|HSP72_HUMAN/sp|P0DMV8|HS71A_HUMAN/sp|P0DMV9|HS71B_HUMAN/sp|P11142|HSP7C_HUMAN/tr|A0A0G2JIW1|A0A0G2JIW1_HUMAN/tr|B4DVU9|B4DVU9_HUMAN/tr|B4DI54|B4DI54_HUMAN/tr|Q53FA3|Q53FA3_HUMAN/tr|V9HW22|V9HW22_HUMAN/tr|Q53GZ6|Q53GZ6_HUMAN/tr|B3KUS2|B3KUS2_HUMAN/tr|E9PKE3|E9PKE3_HUMAN/tr|B4DI39|B4DI39_HUMAN/tr|B…		4.37	0		0	2	MASCOT		T
	R20180100087_1,9315	R.VEIIANDQGNR.I ! K.VEIIANDQGNR.T ! R.VEILANDQGNR.T	1228.63	-0.00305	2	1	73.55	0	3.74e-06	0|0	sp|P11021|GRP78_HUMAN/tr|V9HWB4|V9HWB4_HUMAN/tr|B4DEF7|B4DEF7_HUMAN ! sp|P34931|HS71L_HUMAN/sp|P54652|HSP72_HUMAN/sp|P0DMV8|HS71A_HUMAN/sp|P0DMV9|HS71B_HUMAN/sp|P11142|HSP7C_HUMAN/tr|A0A0G2JIW1|A0A0G2JIW1_HUMAN/tr|B4DVU9|B4DVU9_HUMAN/tr|B4DI54|B4DI54_HUMAN/tr|Q53FA3|Q53FA3_HUMAN/tr|V9HW22|V9HW22_HUMAN/tr|Q53GZ6|Q53GZ6_HUMAN/tr|B3KUS2|B3KUS2_HUMAN/tr|E9PKE3|E9PKE3_HUMAN/tr|B4DI39|B4DI39_HUMAN/tr|B…		4.37	0		0	2	MASCOT		T
	R20180100087_1,9954	R.VEIIANDQGNR.I ! K.VEIIANDQGNR.T ! R.VEILANDQGNR.T	1228.63	-0.00071	2	1	45.92	0	0.00213	0|0	sp|P11021|GRP78_HUMAN/tr|V9HWB4|V9HWB4_HUMAN/tr|B4DEF7|B4DEF7_HUMAN ! sp|P34931|HS71L_HUMAN/sp|P54652|HSP72_HUMAN/sp|P0DMV8|HS71A_HUMAN/sp|P0DMV9|HS71B_HUMAN/sp|P11142|HSP7C_HUMAN/tr|A0A0G2JIW1|A0A0G2JIW1_HUMAN/tr|B4DVU9|B4DVU9_HUMAN/tr|B4DI54|B4DI54_HUMAN/tr|Q53FA3|Q53FA3_HUMAN/tr|V9HW22|V9HW22_HUMAN/tr|Q53GZ6|Q53GZ6_HUMAN/tr|B3KUS2|B3KUS2_HUMAN/tr|E9PKE3|E9PKE3_HUMAN/tr|B4DI39|B4DI39_HUMAN/tr|B…		4.37	0		0	2	MASCOT		T
	R20180100087_1,12060	R.VEIIANDQGNR.I ! K.VEIIANDQGNR.T ! R.VEILANDQGNR.T	1228.63	-0.00611	2	1	20.45	0	0.764	0|0	sp|P11021|GRP78_HUMAN/tr|V9HWB4|V9HWB4_HUMAN/tr|B4DEF7|B4DEF7_HUMAN ! sp|P34931|HS71L_HUMAN/sp|P54652|HSP72_HUMAN/sp|P0DMV8|HS71A_HUMAN/sp|P0DMV9|HS71B_HUMAN/sp|P11142|HSP7C_HUMAN/tr|A0A0G2JIW1|A0A0G2JIW1_HUMAN/tr|B4DVU9|B4DVU9_HUMAN/tr|B4DI54|B4DI54_HUMAN/tr|Q53FA3|Q53FA3_HUMAN/tr|V9HW22|V9HW22_HUMAN/tr|Q53GZ6|Q53GZ6_HUMAN/tr|B3KUS2|B3KUS2_HUMAN/tr|E9PKE3|E9PKE3_HUMAN/tr|B4DI39|B4DI39_HUMAN/tr|B…		4.37	0		0	2	MASCOT		T
$13-1	sp|P55072|TERA_HUMAN Transitional endoplasmic reticulum ATPase OS=Homo sapiens GN=VCP PE=1 SV=4	45	30	0.4355	89320.8	5.14
$13-2	tr|V9HW80|V9HW80_HUMAN Epididymis luminal protein 220 OS=Homo sapiens GN=HEL-S-70 PE=2 SV=1	45	30	0.4355	89320.8	5.14
	R20180100087_1,24968	K.DVDLEFLAK.M	1049.55	0.00046	2	1	32.97	0	0.0438	0|0	sp|P55072|TERA_HUMAN/tr|Q0IIN5|Q0IIN5_HUMAN/tr|Q96IF9|Q96IF9_HUMAN/tr|Q9NTC4|Q9NTC4_HUMAN/tr|V9HW80|V9HW80_HUMAN		4.03	0		0	2	MASCOT		T
	R20180100087_1,20369	K.EMVELPLR.H	986.534	-0.00066	2	1	36.6	0	0.0192	0|0	sp|P55072|TERA_HUMAN/tr|Q96IF9|Q96IF9_HUMAN/tr|Q9HAP1|Q9HAP1_HUMAN/tr|V9HW80|V9HW80_HUMAN		4.53	0		0	2	MASCOT		T
	R20180100087_1,20380	K.EMVELPLR.H	986.534	0.001	1	1	26.56	0	0.394	0|0	sp|P55072|TERA_HUMAN/tr|Q96IF9|Q96IF9_HUMAN/tr|Q9HAP1|Q9HAP1_HUMAN/tr|V9HW80|V9HW80_HUMAN		4.53	0		0	2	MASCOT		T
	R20180100087_1,7673	K.FGMTPSK.G	767.376	0.00021	2	1	49.88	0	0.000487	0|0	sp|P55072|TERA_HUMAN/tr|Q0IIN5|Q0IIN5_HUMAN/tr|Q96IF9|Q96IF9_HUMAN/tr|Q9NTC4|Q9NTC4_HUMAN/tr|V9HW80|V9HW80_HUMAN/tr|Q9HAP0|Q9HAP0_HUMAN		8.75	0		0	2	MASCOT		T
	R20180100087_1,17395	K.GDDLSTAILK.Q	1032.56	0.00017	2	1	57.32	0	0.000192	0|0	sp|P55072|TERA_HUMAN/tr|V9HW80|V9HW80_HUMAN		4.21	0		0	2	MASCOT		T
	R20180100087_1,29261	K.GPELLTM*WFGESEANVR.E	1951.92	0.00144	2	1	43.85	0	0.00229	0|0	sp|P55072|TERA_HUMAN/tr|Q0IIN5|Q0IIN5_HUMAN/tr|Q96IF9|Q96IF9_HUMAN/tr|Q9NTC4|Q9NTC4_HUMAN/tr|V9HW80|V9HW80_HUMAN/tr|Q9HAP0|Q9HAP0_HUMAN		4.25	0	15.994919 Oxidation (M)	0	2	MASCOT		T
	R20180100087_1,6757	K.LAGESESNLR.K	1075.54	0.00087	2	1	62.14	0	5.1e-05	0|0	sp|P55072|TERA_HUMAN/tr|Q96IF9|Q96IF9_HUMAN/tr|Q9HAP1|Q9HAP1_HUMAN/tr|V9HW80|V9HW80_HUMAN		4.53	0		0	2	MASCOT		T
	R20180100087_1,21405	K.M*DELQLFR.G ! -.M*DELQLFR.G	1067.52	-0.00075	2	1	52.89	0	0.000279	0|0	sp|P55072|TERA_HUMAN/tr|V9HW80|V9HW80_HUMAN ! tr|C9JUP7|C9JUP7_HUMAN/tr|C9IZA5|C9IZA5_HUMAN		4.37	0	15.994919 Oxidation (M)	0	2	MASCOT		T
	R20180100087_1,23962	K.MDELQLFR.G ! -.MDELQLFR.G	1051.52	-0.00165	2	1	55.65	0	0.000473	0|0	sp|P55072|TERA_HUMAN/tr|V9HW80|V9HW80_HUMAN ! tr|C9JUP7|C9JUP7_HUMAN/tr|C9IZA5|C9IZA5_HUMAN		4.37	0		0	2	MASCOT		T
	R20180100087_1,21075	K.MTNGFSGADLTEICQR.A	1799.81	-0.00123	2	1	104.16	0	3.87e-09	0|0	sp|P55072|TERA_HUMAN/tr|Q0IIN5|Q0IIN5_HUMAN/tr|Q96IF9|Q96IF9_HUMAN/tr|Q9NTC4|Q9NTC4_HUMAN/tr|V9HW80|V9HW80_HUMAN		4.37	0		0	2	MASCOT		T
	R20180100087_1,31087	K.NAPAIIFIDELDAIAPK.R	1810.99	-0.00054	2	1	98.85	0	6.06e-09	0|0	sp|P55072|TERA_HUMAN/tr|Q96IF9|Q96IF9_HUMAN/tr|Q9HAP1|Q9HAP1_HUMAN/tr|V9HW80|V9HW80_HUMAN		4.03	0		0	2	MASCOT		T
	R20180100087_1,31089	K.NAPAIIFIDELDAIAPK.R	1810.99	-0.00213	3	1	96.44	0	1.05e-08	0|0	sp|P55072|TERA_HUMAN/tr|Q96IF9|Q96IF9_HUMAN/tr|Q9HAP1|Q9HAP1_HUMAN/tr|V9HW80|V9HW80_HUMAN		4.03	0		0	2	MASCOT		T
	R20180100087_1,19459	K.YEMFAQTLQQSR.G	1501.71	-0.00021	2	1	67.77	0	1.03e-05	0|0	sp|P55072|TERA_HUMAN/tr|Q0IIN5|Q0IIN5_HUMAN/tr|Q96IF9|Q96IF9_HUMAN/tr|Q9NTC4|Q9NTC4_HUMAN/tr|V9HW80|V9HW80_HUMAN		6	0		0	2	MASCOT		T
	R20180100087_1,4110	R.DHFEEAM*R.F	1050.43	-0.00036	2	1	20.02	0	0.0677	0|0	sp|P55072|TERA_HUMAN/tr|Q0IIN5|Q0IIN5_HUMAN/tr|Q96IF9|Q96IF9_HUMAN/tr|Q9NTC4|Q9NTC4_HUMAN/tr|V9HW80|V9HW80_HUMAN		4.65	0	15.994919 Oxidation (M)	0	2	MASCOT		T
	R20180100087_1,7510	R.DHFEEAMR.F	1034.44	-0.0008	2	1	25.55	0	0.0357	0|0	sp|P55072|TERA_HUMAN/tr|Q0IIN5|Q0IIN5_HUMAN/tr|Q96IF9|Q96IF9_HUMAN/tr|Q9NTC4|Q9NTC4_HUMAN/tr|V9HW80|V9HW80_HUMAN		4.65	0		0	2	MASCOT		T
	R20180100087_1,18857	R.EAVCIVLSDDTCSDEK.I	1840.79	-0.0012	2	1	37.07	0	0.00364	0|0	sp|P55072|TERA_HUMAN/tr|C9JUP7|C9JUP7_HUMAN/tr|C9IZA5|C9IZA5_HUMAN/tr|Q9HAP1|Q9HAP1_HUMAN/tr|V9HW80|V9HW80_HUMAN		3.77	0		0	2	MASCOT		T
	R20180100087_1,20500	R.EAVCIVLSDDTCSDEK.I	1840.79	-0.0042	2	1	24.99	0	0.0643	0|0	sp|P55072|TERA_HUMAN/tr|C9JUP7|C9JUP7_HUMAN/tr|C9IZA5|C9IZA5_HUMAN/tr|Q9HAP1|Q9HAP1_HUMAN/tr|V9HW80|V9HW80_HUMAN		3.77	0		0	2	MASCOT		T
	R20180100087_1,19158	R.EDEEESLNEVGYDDIGGCR.K	2185.88	-0.00223	2	1	104.73	0	2.17e-10	0|0	sp|P55072|TERA_HUMAN/tr|Q96IF9|Q96IF9_HUMAN/tr|Q9HAP1|Q9HAP1_HUMAN/tr|V9HW80|V9HW80_HUMAN		3.62	0		0	2	MASCOT		T
	R20180100087_1,19163	R.EDEEESLNEVGYDDIGGCR.K	2185.88	-0.00141	3	1	37.82	0	0.00107	0|0	sp|P55072|TERA_HUMAN/tr|Q96IF9|Q96IF9_HUMAN/tr|Q9HAP1|Q9HAP1_HUMAN/tr|V9HW80|V9HW80_HUMAN		3.62	0		0	2	MASCOT		T
	R20180100087_1,18353	R.ELQELVQYPVEHPDK.F	1823.92	0.0006	2	1	48.7	0	0.00107	0|0	sp|P55072|TERA_HUMAN/tr|Q0IIN5|Q0IIN5_HUMAN/tr|Q96IF9|Q96IF9_HUMAN/tr|Q9NTC4|Q9NTC4_HUMAN/tr|V9HW80|V9HW80_HUMAN/tr|Q9HAP0|Q9HAP0_HUMAN		4.4	0		0	2	MASCOT		T
	R20180100087_1,18373	R.ELQELVQYPVEHPDK.F	1823.92	0.00051	3	1	39.89	0	0.00816	0|0	sp|P55072|TERA_HUMAN/tr|Q0IIN5|Q0IIN5_HUMAN/tr|Q96IF9|Q96IF9_HUMAN/tr|Q9NTC4|Q9NTC4_HUMAN/tr|V9HW80|V9HW80_HUMAN/tr|Q9HAP0|Q9HAP0_HUMAN		4.4	0		0	2	MASCOT		T
	R20180100087_1,11442	R.ESIESEIR.R	962.479	0.0009	2	1	57.44	0	0.000175	0|0	sp|P55072|TERA_HUMAN/tr|Q0IIN5|Q0IIN5_HUMAN/tr|Q96IF9|Q96IF9_HUMAN/tr|Q9NTC4|Q9NTC4_HUMAN/tr|V9HW80|V9HW80_HUMAN		4.25	0		0	2	MASCOT		T
	R20180100087_1,9921	R.ESIESEIRR.E	1118.58	-0.00124	2	1	28.7	0	0.133	0|0	sp|P55072|TERA_HUMAN/tr|Q0IIN5|Q0IIN5_HUMAN/tr|Q96IF9|Q96IF9_HUMAN/tr|Q9NTC4|Q9NTC4_HUMAN/tr|V9HW80|V9HW80_HUMAN		4.79	1		0	2	MASCOT		T
	R20180100087_1,27667	R.ETVVEVPQVTWEDIGGLEDVKR.E	2498.28	-0.00354	2	1	65.23	0	2.12e-05	0|0	sp|P55072|TERA_HUMAN/tr|Q0IIN5|Q0IIN5_HUMAN/tr|Q96IF9|Q96IF9_HUMAN/tr|Q9NTC4|Q9NTC4_HUMAN/tr|V9HW80|V9HW80_HUMAN/tr|Q9HAP0|Q9HAP0_HUMAN		4.08	1		0	2	MASCOT		T
	R20180100087_1,19432	R.GILLYGPPGTGK.T ! K.GLLLYGPPGTGK.T	1172.67	-0.003	2	1	50.03	0	0.000744	0|0	sp|P55072|TERA_HUMAN/tr|Q96IF9|Q96IF9_HUMAN/tr|Q9HAP1|Q9HAP1_HUMAN/tr|V9HW80|V9HW80_HUMAN ! sp|Q8IYT4|KATL2_HUMAN/tr|K7EM02|K7EM02_HUMAN/tr|K7EIJ8|K7EIJ8_HUMAN		8.59	0		0	2	MASCOT		T
	R20180100087_1,6588	R.HPALFK.A	712.414	4e-05	2	1	21.2	0	0.182	0|0	sp|P55072|TERA_HUMAN/tr|Q96IF9|Q96IF9_HUMAN/tr|Q9HAP1|Q9HAP1_HUMAN/tr|V9HW80|V9HW80_HUMAN		8.76	0		0	2	MASCOT		T
	R20180100087_1,29574	R.IVSQLLTLMDGLK.Q	1430.83	0.00094	2	1	86.69	0	9.05e-08	0|0	sp|P55072|TERA_HUMAN/tr|Q96IF9|Q96IF9_HUMAN/tr|Q9HAP1|Q9HAP1_HUMAN/tr|V9HW80|V9HW80_HUMAN		5.84	0		0	2	MASCOT		T
	R20180100087_1,29598	R.IVSQLLTLMDGLK.Q	1430.83	0.00104	3	1	51.69	0	0.000286	0|0	sp|P55072|TERA_HUMAN/tr|Q96IF9|Q96IF9_HUMAN/tr|Q9HAP1|Q9HAP1_HUMAN/tr|V9HW80|V9HW80_HUMAN		5.84	0		0	2	MASCOT		T
	R20180100087_1,14799	R.KGDIFLVR.G	947.567	-3e-05	2	1	28.46	0	0.0503	0|0	sp|P55072|TERA_HUMAN/tr|C9JUP7|C9JUP7_HUMAN/tr|C9IZA5|C9IZA5_HUMAN/tr|Q9HAP1|Q9HAP1_HUMAN/tr|V9HW80|V9HW80_HUMAN		8.75	1		0	2	MASCOT		T
	R20180100087_1,14811	R.KGDIFLVR.G	947.567	0.00233	3	1	24.69	0	0.122	0|0	sp|P55072|TERA_HUMAN/tr|C9JUP7|C9JUP7_HUMAN/tr|C9IZA5|C9IZA5_HUMAN/tr|Q9HAP1|Q9HAP1_HUMAN/tr|V9HW80|V9HW80_HUMAN		8.75	1		0	2	MASCOT		T
	R20180100087_1,16619	R.KYEMFAQTLQQSR.G	1629.81	-0.00094	2	1	83.82	0	2.65e-06	0|0	sp|P55072|TERA_HUMAN/tr|Q0IIN5|Q0IIN5_HUMAN/tr|Q96IF9|Q96IF9_HUMAN/tr|Q9NTC4|Q9NTC4_HUMAN/tr|V9HW80|V9HW80_HUMAN		8.59	1		0	2	MASCOT		T
	R20180100087_1,16634	R.KYEMFAQTLQQSR.G	1629.81	-0.00108	3	1	48.96	0	0.00812	0|0	sp|P55072|TERA_HUMAN/tr|Q0IIN5|Q0IIN5_HUMAN/tr|Q96IF9|Q96IF9_HUMAN/tr|Q9NTC4|Q9NTC4_HUMAN/tr|V9HW80|V9HW80_HUMAN		8.59	1		0	2	MASCOT		T
	R20180100087_1,27790	R.LDQLIYIPLPDEK.S	1556.86	-0.0005	2	1	38	0	0.0268	0|0	sp|P55072|TERA_HUMAN/tr|Q0IIN5|Q0IIN5_HUMAN/tr|Q96IF9|Q96IF9_HUMAN/tr|Q9NTC4|Q9NTC4_HUMAN/tr|V9HW80|V9HW80_HUMAN		4.03	0		0	2	MASCOT		T
	R20180100087_1,16827	R.LEILQIHTK.N	1094.66	0.00131	3	1	34.84	0	0.00771	0|0	sp|P55072|TERA_HUMAN/tr|Q0IIN5|Q0IIN5_HUMAN/tr|Q96IF9|Q96IF9_HUMAN/tr|Q9NTC4|Q9NTC4_HUMAN/tr|V9HW80|V9HW80_HUMAN/tr|Q9HAP0|Q9HAP0_HUMAN		6.75	0		0	2	MASCOT		T
	R20180100087_1,16860	R.LEILQIHTK.N	1094.66	0.00059	2	1	51.95	0	0.00015	0|0	sp|P55072|TERA_HUMAN/tr|Q0IIN5|Q0IIN5_HUMAN/tr|Q96IF9|Q96IF9_HUMAN/tr|Q9NTC4|Q9NTC4_HUMAN/tr|V9HW80|V9HW80_HUMAN/tr|Q9HAP0|Q9HAP0_HUMAN		6.75	0		0	2	MASCOT		T
	R20180100087_1,20144	R.LGDVISIQPCPDVK.Y	1540.8	-0.0015	2	1	68.88	0	9.15e-06	0|0	sp|P55072|TERA_HUMAN/tr|C9JUP7|C9JUP7_HUMAN/tr|C9IZA5|C9IZA5_HUMAN/tr|Q9HAP1|Q9HAP1_HUMAN/tr|V9HW80|V9HW80_HUMAN		4.21	0		0	2	MASCOT		T
	R20180100087_1,24409	R.LIVDEAINEDNSVVSLSQPK.M	2170.12	0.00082	2	1	98.39	0	2.91e-08	0|0	sp|P55072|TERA_HUMAN/tr|V9HW80|V9HW80_HUMAN		3.92	0		0	2	MASCOT		T
	R20180100087_1,24432	R.LIVDEAINEDNSVVSLSQPK.M	2170.12	-0.01278	3	1	34.42	0	0.0251	0|0	sp|P55072|TERA_HUMAN/tr|V9HW80|V9HW80_HUMAN		3.92	0		0	2	MASCOT		T
	R20180100087_1,30627	R.QAAPCVLFFDELDSIAK.A	1923.95	0.00017	2	1	99.26	0	1e-08	0|0	sp|P55072|TERA_HUMAN/tr|Q0IIN5|Q0IIN5_HUMAN/tr|Q96IF9|Q96IF9_HUMAN/tr|Q9NTC4|Q9NTC4_HUMAN/tr|V9HW80|V9HW80_HUMAN/tr|Q9HAP0|Q9HAP0_HUMAN		4.03	0		0	2	MASCOT		T
	R20180100087_1,30646	R.QAAPCVLFFDELDSIAK.A	1923.95	-0.00134	3	1	68.41	0	1.22e-05	0|0	sp|P55072|TERA_HUMAN/tr|Q0IIN5|Q0IIN5_HUMAN/tr|Q96IF9|Q96IF9_HUMAN/tr|Q9NTC4|Q9NTC4_HUMAN/tr|V9HW80|V9HW80_HUMAN/tr|Q9HAP0|Q9HAP0_HUMAN		4.03	0		0	2	MASCOT		T
	R20180100087_1,21033	R.QTNPSAMEVEEDDPVPEIR.R	2155.98	0.00646	2	1	105.55	0	6.28e-09	0|0	sp|P55072|TERA_HUMAN/tr|Q0IIN5|Q0IIN5_HUMAN/tr|Q96IF9|Q96IF9_HUMAN/tr|Q9NTC4|Q9NTC4_HUMAN/tr|V9HW80|V9HW80_HUMAN		3.77	0		0	2	MASCOT		T
	R20180100087_1,5647	R.RDHFEEAMR.F	1190.54	-0.00083	3	1	25.9	0	0.0878	0|0	sp|P55072|TERA_HUMAN/tr|Q0IIN5|Q0IIN5_HUMAN/tr|Q96IF9|Q96IF9_HUMAN/tr|Q9NTC4|Q9NTC4_HUMAN/tr|V9HW80|V9HW80_HUMAN		5.45	1		0	2	MASCOT		T
	R20180100087_1,5649	R.RDHFEEAMR.F	1190.54	-0.00495	2	1	37.31	0	0.00738	0|0	sp|P55072|TERA_HUMAN/tr|Q0IIN5|Q0IIN5_HUMAN/tr|Q96IF9|Q96IF9_HUMAN/tr|Q9NTC4|Q9NTC4_HUMAN/tr|V9HW80|V9HW80_HUMAN		5.45	1		0	2	MASCOT		T
	R20180100087_1,17597	R.VINQILTEM*DGMSTK.K	1695.83	0.00725	2	1	40.95	0	0.0169	0|0	sp|P55072|TERA_HUMAN/tr|Q0IIN5|Q0IIN5_HUMAN/tr|Q96IF9|Q96IF9_HUMAN/tr|Q9NTC4|Q9NTC4_HUMAN/tr|V9HW80|V9HW80_HUMAN/tr|Q9HAP0|Q9HAP0_HUMAN		4.37	0	15.994919 Oxidation (M)	0	2	MASCOT		T
	R20180100087_1,22669	R.VINQILTEMDGMSTK.K	1679.83	-0.00147	2	1	53.2	0	0.000922	0|0	sp|P55072|TERA_HUMAN/tr|Q0IIN5|Q0IIN5_HUMAN/tr|Q96IF9|Q96IF9_HUMAN/tr|Q9NTC4|Q9NTC4_HUMAN/tr|V9HW80|V9HW80_HUMAN/tr|Q9HAP0|Q9HAP0_HUMAN		4.37	0		0	2	MASCOT		T
$14-1	sp|P12270|TPR_HUMAN Nucleoprotein TPR OS=Homo sapiens GN=TPR PE=1 SV=3	31	30	0.1557	267290	4.97
	R20180100087_1,15909	K.AIQDHLLEVEQSK.D	1509.79	0.001	2	1	79.48	0	8.66e-07	0|0	sp|P12270|TPR_HUMAN/tr|Q58F23|Q58F23_HUMAN/tr|A0PJC9|A0PJC9_HUMAN/tr|Q504U6|Q504U6_HUMAN		4.65	0		0	2	MASCOT		T
	R20180100087_1,15915	K.AIQDHLLEVEQSK.D	1509.79	-0.00152	3	1	45.61	0	0.00215	0|0	sp|P12270|TPR_HUMAN/tr|Q58F23|Q58F23_HUMAN/tr|A0PJC9|A0PJC9_HUMAN/tr|Q504U6|Q504U6_HUMAN		4.65	0		0	2	MASCOT		T
	R20180100087_1,16252	K.AIQDHLLEVEQSKDQMEK.E	2141.05	0.00256	3	1	34.74	0	0.0243	0|0	sp|P12270|TPR_HUMAN/tr|Q58F23|Q58F23_HUMAN/tr|A0PJC9|A0PJC9_HUMAN/tr|Q504U6|Q504U6_HUMAN		4.5	1		0	2	MASCOT		T
	R20180100087_1,3788	K.DPDTEEYRK.L	1152.52	1e-05	2	1	26.88	0	0.294	0|0	sp|P12270|TPR_HUMAN		4.32	1		0	2	MASCOT		T
	R20180100087_1,19045	K.EGVQGPLNVSLSEEGK.S	1642.83	0.00112	2	1	53.87	0	0.000335	0|0	sp|P12270|TPR_HUMAN		4.25	0		0	2	MASCOT		T
	R20180100087_1,18573	K.ELENANDLLSATK.R	1417.72	0.00121	2	1	84.57	0	2.81e-07	0|0	sp|P12270|TPR_HUMAN/tr|Q58F23|Q58F23_HUMAN/tr|A0PJC9|A0PJC9_HUMAN/tr|Q504U6|Q504U6_HUMAN		4.14	0		0	2	MASCOT		T
	R20180100087_1,19797	K.FKVESEQQYFEIEK.R	1803.88	-0.00032	2	1	66.7	0	5.97e-05	0|0	sp|P12270|TPR_HUMAN/tr|Q58F23|Q58F23_HUMAN/tr|Q5SWX9|Q5SWX9_HUMAN/tr|Q504U6|Q504U6_HUMAN		4.49	1		0	2	MASCOT		T
	R20180100087_1,18267	K.FLADQQSEIDGLK.G	1463.74	-5e-05	2	1	83.29	0	4.56e-07	0|0	sp|P12270|TPR_HUMAN/tr|Q58F23|Q58F23_HUMAN/tr|Q5SWX9|Q5SWX9_HUMAN/tr|Q504U6|Q504U6_HUMAN		4.03	0		0	2	MASCOT		T
	R20180100087_1,9642	K.HVEDLLTK.L	954.525	-0.0006	2	1	26.42	0	0.121	0|0	sp|P12270|TPR_HUMAN/tr|Q58F23|Q58F23_HUMAN/tr|A0PJC9|A0PJC9_HUMAN/tr|Q504U6|Q504U6_HUMAN		5.32	0		0	2	MASCOT		T
	R20180100087_1,10012	K.IIDIQEK.V ! K.LIDIQEK.I	858.493	-8e-05	2	1	31.64	0	0.0887	0|0	sp|P12270|TPR_HUMAN ! sp|Q15154|PCM1_HUMAN/tr|E7ETA6|E7ETA6_HUMAN/tr|A2RUU9|A2RUU9_HUMAN/tr|B9EIS5|B9EIS5_HUMAN/tr|A6NNN6|A6NNN6_HUMAN/tr|D3DSQ0|D3DSQ0_HUMAN		4.37	0		0	2	MASCOT		T
	R20180100087_1,4865	K.IQNEQLEK.L	1001.53	-0.00024	2	1	46.95	0	0.00164	0|0	sp|P12270|TPR_HUMAN		4.53	0		0	2	MASCOT		T
	R20180100087_1,15944	K.ISTQLDFASK.R	1109.58	0.0004	2	1	28.24	0	0.102	0|0	sp|P12270|TPR_HUMAN		5.84	0		0	2	MASCOT		T
	R20180100087_1,23940	K.LESALTELEQLRK.S	1529.85	-0.00085	3	1	40.74	0	0.00579	0|0	sp|P12270|TPR_HUMAN/tr|Q58F23|Q58F23_HUMAN/tr|A0PJC9|A0PJC9_HUMAN/tr|Q504U6|Q504U6_HUMAN		4.79	1		0	2	MASCOT		T
	R20180100087_1,21727	K.RPSTSQTVSTPAPVPVIESTEAIEAK.A	2695.41	0.00011	3	1	42.2	0	0.00302	0|0	sp|P12270|TPR_HUMAN/tr|Q58F23|Q58F23_HUMAN/tr|A0PJC9|A0PJC9_HUMAN/tr|Q504U6|Q504U6_HUMAN		4.79	0		0	2	MASCOT		T
	R20180100087_1,25607	K.SQEQILEILR.F	1228.69	0.00574	2	1	50.85	0	0.000742	0|0	sp|P12270|TPR_HUMAN		4.53	0		0	2	MASCOT		T
	R20180100087_1,24773	K.TLSSVQNEVQEALQR.A	1701.88	-0.00086	3	1	42.72	0	0.00463	0|0	sp|P12270|TPR_HUMAN		4.53	0		0	2	MASCOT		T
	R20180100087_1,5288	R.EITSLHER.N	984.511	0.00104	2	1	34.73	0	0.0187	0|0	sp|P12270|TPR_HUMAN		5.4	0		0	2	MASCOT		T
	R20180100087_1,13477	R.EKGNEILELK.C	1172.65	0.00043	3	1	20.59	0	0.727	0|0	sp|P12270|TPR_HUMAN/tr|Q9UE33|Q9UE33_HUMAN/tr|Q58F23|Q58F23_HUMAN/tr|Q504U6|Q504U6_HUMAN		4.79	1		0	2	MASCOT		T
	R20180100087_1,21175	R.ELMLHAADVEALQAAK.E	1709.89	-0.00066	3	1	32.26	0	0.0683	0|0	sp|P12270|TPR_HUMAN		4.65	0		0	2	MASCOT		T
	R20180100087_1,15009	R.GIASTSDPPTANIKPTPVVSTPSK.V	2365.26	0.00189	3	1	38.29	0	0.00731	0|0	sp|P12270|TPR_HUMAN		8.59	0		0	2	MASCOT		T
	R20180100087_1,31426	R.GQNLLLTNLQTIQGILER.S	2024.15	-0.00113	2	1	88.71	0	3.56e-08	0|0	sp|P12270|TPR_HUMAN		6	0		0	2	MASCOT		T
	R20180100087_1,27800	R.KLELDILPLQEANAELSEK.S	2153.17	-0.01145	2	1	59.95	0	0.000137	0|0	sp|P12270|TPR_HUMAN		4.25	1		0	2	MASCOT		T
	R20180100087_1,10632	R.LEQDLQQMQAK.V	1331.66	-0.00385	2	1	69.01	0	9.19e-06	0|0	sp|P12270|TPR_HUMAN		4.37	0		0	2	MASCOT		T
	R20180100087_1,24292	R.LSQELEYLTEDVK.R	1566.79	0.00031	2	1	96.08	0	2.44e-08	0|0	sp|P12270|TPR_HUMAN/tr|Q58F23|Q58F23_HUMAN/tr|Q504U6|Q504U6_HUMAN		4	0		0	2	MASCOT		T
	R20180100087_1,21591	R.LSQELEYLTEDVKR.L	1722.89	-0.00448	3	1	53.11	0	0.000645	0|0	sp|P12270|TPR_HUMAN/tr|Q58F23|Q58F23_HUMAN/tr|Q504U6|Q504U6_HUMAN		4.41	1		0	2	MASCOT		T
	R20180100087_1,11407	R.NGALDQQKDELDVR.I	1600.79	0.0012	2	1	53.06	0	0.0004	0|0	sp|P12270|TPR_HUMAN		4.23	1		0	2	MASCOT		T
	R20180100087_1,21594	R.NLQEQTVQLQSELSR.L	1772.91	-0.00183	2	1	81.64	0	5.91e-07	0|0	sp|P12270|TPR_HUMAN		4.53	0		0	2	MASCOT		T
	R20180100087_1,12724	R.QLDTETNLHLNTK.E	1526.78	0.00077	2	1	52.28	0	0.000627	0|0	sp|P12270|TPR_HUMAN		5.32	0		0	2	MASCOT		T
	R20180100087_1,6793	R.QTEEQVNDLK.E	1203.59	0.00109	2	1	90.23	0	6.34e-08	0|0	sp|P12270|TPR_HUMAN		4.14	0		0	2	MASCOT		T
	R20180100087_1,3098	R.TKEELEAEKR.D	1232.65	-0.00143	3	1	46.58	0	0.00224	0|0	sp|P12270|TPR_HUMAN/tr|Q58F23|Q58F23_HUMAN/tr|Q504U6|Q504U6_HUMAN		4.94	2		0	2	MASCOT		T
	R20180100087_1,11272	R.VELLER.E	758.441	0.00053	2	1	48.2	0	0.00218	0|0	sp|P12270|TPR_HUMAN		4.53	0		0	2	MASCOT		T
$15-1	tr|Q59HH3|Q59HH3_HUMAN Trifunctional purine biosynthetic protein adenosine-3 (Fragment) OS=Homo sapiens PE=2 SV=1	42	29	0.3987	112137	7.14
$15-2	tr|Q3B7A7|Q3B7A7_HUMAN Trifunctional purine biosynthetic protein adenosine-3 OS=Homo sapiens GN=GART PE=2 SV=1	42	29	0.4129	107722	6.33
$15-3	sp|P22102|PUR2_HUMAN Trifunctional purine biosynthetic protein adenosine-3 OS=Homo sapiens GN=GART PE=1 SV=1	42	29	0.4129	107766	6.26
	R20180100087_1,18716	K.AAGFKDPLLASGTDGVGTK.L	1804.94	-0.00596	2	1	65.41	0	2.52e-05	0|0	sp|P22102|PUR2_HUMAN/tr|Q59HH3|Q59HH3_HUMAN/tr|Q3B7A7|Q3B7A7_HUMAN/tr|B4DJ93|B4DJ93_HUMAN/tr|Q71VH3|Q71VH3_HUMAN/tr|O14660|O14660_HUMAN		6	1		0	2	MASCOT		T
	R20180100087_1,18806	K.AAGFKDPLLASGTDGVGTK.L	1804.94	-0.00334	3	1	55.45	0	0.000252	0|0	sp|P22102|PUR2_HUMAN/tr|Q59HH3|Q59HH3_HUMAN/tr|Q3B7A7|Q3B7A7_HUMAN/tr|B4DJ93|B4DJ93_HUMAN/tr|Q71VH3|Q71VH3_HUMAN/tr|O14660|O14660_HUMAN		6	1		0	2	MASCOT		T
	R20180100087_1,24291	K.AFAHITGGGLLENIPR.V	1665.91	-0.00095	3	1	41.7	0	0.00439	0|0	sp|P22102|PUR2_HUMAN/tr|Q59HH3|Q59HH3_HUMAN/tr|Q3B7A7|Q3B7A7_HUMAN/tr|B4DJ93|B4DJ93_HUMAN		6.79	0		0	2	MASCOT		T
	R20180100087_1,24295	K.AFAHITGGGLLENIPR.V	1665.91	0.00352	2	1	49.1	0	0.000826	0|0	sp|P22102|PUR2_HUMAN/tr|Q59HH3|Q59HH3_HUMAN/tr|Q3B7A7|Q3B7A7_HUMAN/tr|B4DJ93|B4DJ93_HUMAN		6.79	0		0	2	MASCOT		T
	R20180100087_1,28904	K.AFTKPEEACSFILSADFPALVVK.A	2540.31	0.00063	3	1	63.2	0	3.18e-05	0|0	sp|P22102|PUR2_HUMAN/tr|C9JBJ1|C9JBJ1_HUMAN/tr|H7C366|H7C366_HUMAN/tr|C9JTV6|C9JTV6_HUMAN/tr|Q59HH3|Q59HH3_HUMAN/tr|Q15374|Q15374_HUMAN/tr|Q3B7A7|Q3B7A7_HUMAN/tr|F8WD69|F8WD69_HUMAN		4.68	0		0	2	MASCOT		T
	R20180100087_1,28929	K.AFTKPEEACSFILSADFPALVVK.A	2540.31	0.00361	2	1	85.54	0	1.89e-07	0|0	sp|P22102|PUR2_HUMAN/tr|C9JBJ1|C9JBJ1_HUMAN/tr|H7C366|H7C366_HUMAN/tr|C9JTV6|C9JTV6_HUMAN/tr|Q59HH3|Q59HH3_HUMAN/tr|Q15374|Q15374_HUMAN/tr|Q3B7A7|Q3B7A7_HUMAN/tr|F8WD69|F8WD69_HUMAN		4.68	0		0	2	MASCOT		T
	R20180100087_1,9623	K.AVQEIMQEK.A	1075.55	-0.00139	2	1	37.44	0	0.0165	0|0	sp|P22102|PUR2_HUMAN/tr|C9JBJ1|C9JBJ1_HUMAN/tr|H7C366|H7C366_HUMAN/tr|C9JTV6|C9JTV6_HUMAN/tr|Q59HH3|Q59HH3_HUMAN/tr|Q15374|Q15374_HUMAN/tr|Q3B7A7|Q3B7A7_HUMAN/tr|F8WD69|F8WD69_HUMAN		4.53	0		0	2	MASCOT		T
	R20180100087_1,13807	K.DPLLASGTDGVGTK.L	1330.68	-0.00388	2	1	61.88	0	6.05e-05	0|0	sp|P22102|PUR2_HUMAN/tr|Q59HH3|Q59HH3_HUMAN/tr|Q3B7A7|Q3B7A7_HUMAN/tr|B4DJ93|B4DJ93_HUMAN/tr|Q71VH3|Q71VH3_HUMAN/tr|O14660|O14660_HUMAN		4.21	0		0	2	MASCOT		T
	R20180100087_1,24389	K.EEAWVIGSVVAR.A	1315.7	-0.00042	2	1	53.87	0	0.000397	0|0	sp|P22102|PUR2_HUMAN/tr|Q59HH3|Q59HH3_HUMAN/tr|Q3B7A7|Q3B7A7_HUMAN/tr|A0A140TA71|A0A140TA71_HUMAN/tr|B4DJ93|B4DJ93_HUMAN		4.53	0		0	2	MASCOT		T
	R20180100087_1,10825	K.FEGAIYR.K	855.436	-0.00067	2	1	25.26	0	0.109	0|0	sp|P22102|PUR2_HUMAN/tr|Q59HH3|Q59HH3_HUMAN/tr|Q15374|Q15374_HUMAN/tr|Q3B7A7|Q3B7A7_HUMAN		6	0		0	2	MASCOT		T
	R20180100087_1,29471	K.GVEITGFPEAQALGLEVFHAGTALK.N	2555.35	0.00096	3	1	58.84	0	7.11e-05	0|0	sp|P22102|PUR2_HUMAN/tr|Q59HH3|Q59HH3_HUMAN/tr|Q3B7A7|Q3B7A7_HUMAN		4.75	0		0	2	MASCOT		T
	R20180100087_1,29499	K.GVEITGFPEAQALGLEVFHAGTALK.N	2555.35	-0.00881	2	1	92.46	0	2.76e-08	0|0	sp|P22102|PUR2_HUMAN/tr|Q59HH3|Q59HH3_HUMAN/tr|Q3B7A7|Q3B7A7_HUMAN		4.75	0		0	2	MASCOT		T
	R20180100087_1,29620	K.IEFVVVGPEAPLAAGIVGNLR.S	2121.21	0.00111	3	1	71.66	0	1.36e-06	0|0	sp|P22102|PUR2_HUMAN/tr|C9JBJ1|C9JBJ1_HUMAN/tr|C9JTV6|C9JTV6_HUMAN/tr|C9JZG2|C9JZG2_HUMAN/tr|Q59HH3|Q59HH3_HUMAN/tr|C9JKQ7|C9JKQ7_HUMAN/tr|Q15374|Q15374_HUMAN/tr|Q3B7A7|Q3B7A7_HUMAN/tr|F8WD69|F8WD69_HUMAN		4.53	0		0	2	MASCOT		T
	R20180100087_1,6811	K.IKDTVLQR.T	972.584	0.00053	3	1	33.2	0	0.0316	0|0	sp|P22102|PUR2_HUMAN/tr|Q59HH3|Q59HH3_HUMAN/tr|Q15374|Q15374_HUMAN/tr|Q3B7A7|Q3B7A7_HUMAN/tr|F8WD69|F8WD69_HUMAN		8.75	1		0	2	MASCOT		T
	R20180100087_1,5577	K.IQPLAK.A	669.429	-0.00022	2	1	23.5	0	0.0409	0|0	sp|P22102|PUR2_HUMAN/tr|Q59HH3|Q59HH3_HUMAN/tr|Q3B7A7|Q3B7A7_HUMAN/tr|B4DJ93|B4DJ93_HUMAN/tr|O14660|O14660_HUMAN		8.75	0		0	2	MASCOT		T
	R20180100087_1,21855	K.ISNTAISISDHTALAQFCK.E	2077.04	0.0024	3	1	82.75	0	4.23e-07	0|0	sp|P22102|PUR2_HUMAN/tr|C9JBJ1|C9JBJ1_HUMAN/tr|C9JTV6|C9JTV6_HUMAN/tr|C9JZG2|C9JZG2_HUMAN/tr|Q59HH3|Q59HH3_HUMAN/tr|C9JKQ7|C9JKQ7_HUMAN/tr|Q15374|Q15374_HUMAN/tr|Q3B7A7|Q3B7A7_HUMAN/tr|F8WD69|F8WD69_HUMAN		6.73	0		0	2	MASCOT		T
	R20180100087_1,21872	K.ISNTAISISDHTALAQFCK.E	2077.04	-0.00425	2	1	101.52	0	5.64e-09	0|0	sp|P22102|PUR2_HUMAN/tr|C9JBJ1|C9JBJ1_HUMAN/tr|C9JTV6|C9JTV6_HUMAN/tr|C9JZG2|C9JZG2_HUMAN/tr|Q59HH3|Q59HH3_HUMAN/tr|C9JKQ7|C9JKQ7_HUMAN/tr|Q15374|Q15374_HUMAN/tr|Q3B7A7|Q3B7A7_HUMAN/tr|F8WD69|F8WD69_HUMAN		6.73	0		0	2	MASCOT		T
	R20180100087_1,28568	K.KIEFVVVGPEAPLAAGIVGNLR.S	2249.3	-0.00033	3	1	51.25	0	9.34e-05	0|0	sp|P22102|PUR2_HUMAN/tr|C9JBJ1|C9JBJ1_HUMAN/tr|C9JTV6|C9JTV6_HUMAN/tr|C9JZG2|C9JZG2_HUMAN/tr|Q59HH3|Q59HH3_HUMAN/tr|C9JKQ7|C9JKQ7_HUMAN/tr|Q15374|Q15374_HUMAN/tr|Q3B7A7|Q3B7A7_HUMAN/tr|F8WD69|F8WD69_HUMAN		6.14	1		0	2	MASCOT		T
	R20180100087_1,28598	K.KIEFVVVGPEAPLAAGIVGNLR.S	2249.3	0.00156	2	1	27.64	0	0.0216	0|0	sp|P22102|PUR2_HUMAN/tr|C9JBJ1|C9JBJ1_HUMAN/tr|C9JTV6|C9JTV6_HUMAN/tr|C9JZG2|C9JZG2_HUMAN/tr|Q59HH3|Q59HH3_HUMAN/tr|C9JKQ7|C9JKQ7_HUMAN/tr|Q15374|Q15374_HUMAN/tr|Q3B7A7|Q3B7A7_HUMAN/tr|F8WD69|F8WD69_HUMAN		6.14	1		0	2	MASCOT		T
	R20180100087_1,22139	K.LGVDLDAQTWR.I	1273.65	0.00921	2	1	61.4	0	0.000211	0|0	sp|P22102|PUR2_HUMAN/tr|Q59HH3|Q59HH3_HUMAN/tr|Q3B7A7|Q3B7A7_HUMAN/tr|B4DJ93|B4DJ93_HUMAN		4.21	0		0	2	MASCOT		T
	R20180100087_1,7773	K.LPHLER.I	764.441	-0.0006	2	1	29.23	0	0.067	0|0	sp|P22102|PUR2_HUMAN/tr|Q59HH3|Q59HH3_HUMAN/tr|Q3B7A7|Q3B7A7_HUMAN/tr|B4DJ93|B4DJ93_HUMAN		6.75	0		0	2	MASCOT		T
	R20180100087_1,24446	K.M*LNIHPSLLPSFK.G	1512.82	0.00053	3	1	42.28	0	0.00374	0|0	sp|P22102|PUR2_HUMAN/tr|Q59HH3|Q59HH3_HUMAN/tr|Q3B7A7|Q3B7A7_HUMAN/tr|A0A140TA71|A0A140TA71_HUMAN/tr|B4DJ93|B4DJ93_HUMAN		8.52	0	15.994919 Oxidation (M)	0	2	MASCOT		T
	R20180100087_1,26084	K.MLNIHPSLLPSFK.G	1496.83	0.00461	3	1	42.9	0	0.00285	0|0	sp|P22102|PUR2_HUMAN/tr|Q59HH3|Q59HH3_HUMAN/tr|Q3B7A7|Q3B7A7_HUMAN/tr|A0A140TA71|A0A140TA71_HUMAN/tr|B4DJ93|B4DJ93_HUMAN		8.52	0		0	2	MASCOT		T
	R20180100087_1,7306	K.RGDTVATLSER.V	1204.63	-0.00113	2	1	30.45	0	0.087	0|0	sp|P22102|PUR2_HUMAN/tr|Q59HH3|Q59HH3_HUMAN/tr|Q3B7A7|Q3B7A7_HUMAN/tr|B4DJ93|B4DJ93_HUMAN		6.07	1		0	2	MASCOT		T
	R20180100087_1,7365	K.RGDTVATLSER.V	1204.63	0.00251	3	1	22.09	0	0.584	0|0	sp|P22102|PUR2_HUMAN/tr|Q59HH3|Q59HH3_HUMAN/tr|Q3B7A7|Q3B7A7_HUMAN/tr|B4DJ93|B4DJ93_HUMAN		6.07	1		0	2	MASCOT		T
	R20180100087_1,27588	K.SSLQYSSPAPDGCGDQTLGDLLLTPTR.I	2849.36	-0.00238	3	1	72.71	0	3.2e-06	0|0	sp|P22102|PUR2_HUMAN/tr|Q59HH3|Q59HH3_HUMAN/tr|Q3B7A7|Q3B7A7_HUMAN/tr|B4DJ93|B4DJ93_HUMAN		3.93	0		0	2	MASCOT		T
	R20180100087_1,27589	K.SSLQYSSPAPDGCGDQTLGDLLLTPTR.I	2849.36	3e-05	2	1	155.93	0	1.47e-14	0|0	sp|P22102|PUR2_HUMAN/tr|Q59HH3|Q59HH3_HUMAN/tr|Q3B7A7|Q3B7A7_HUMAN/tr|B4DJ93|B4DJ93_HUMAN		3.93	0		0	2	MASCOT		T
	R20180100087_1,30096	K.VDLGGFAGLFDLK.A	1351.73	-0.00092	2	1	74.32	0	3.2e-06	0|0	sp|P22102|PUR2_HUMAN/tr|Q59HH3|Q59HH3_HUMAN/tr|Q3B7A7|Q3B7A7_HUMAN/tr|B4DJ93|B4DJ93_HUMAN/tr|Q71VH3|Q71VH3_HUMAN/tr|O14660|O14660_HUMAN		4.21	0		0	2	MASCOT		T
	R20180100087_1,26087	R.ENLISALEEAK.K	1216.64	-0.00036	2	1	41.69	0	0.00698	0|0	sp|P22102|PUR2_HUMAN/tr|Q59HH3|Q59HH3_HUMAN/tr|Q15374|Q15374_HUMAN/tr|Q3B7A7|Q3B7A7_HUMAN		4.25	0		0	2	MASCOT		T
	R20180100087_1,22040	R.ENLISALEEAKK.G	1344.74	0.00035	3	1	41.97	0	0.00875	0|0	sp|P22102|PUR2_HUMAN/tr|Q59HH3|Q59HH3_HUMAN/tr|Q15374|Q15374_HUMAN/tr|Q3B7A7|Q3B7A7_HUMAN		4.79	1		0	2	MASCOT		T
	R20180100087_1,22083	R.ENLISALEEAKK.G	1344.74	-0.00452	2	1	40.97	0	0.0109	0|0	sp|P22102|PUR2_HUMAN/tr|Q59HH3|Q59HH3_HUMAN/tr|Q15374|Q15374_HUMAN/tr|Q3B7A7|Q3B7A7_HUMAN		4.79	1		0	2	MASCOT		T
	R20180100087_1,28337	R.FGDPECQVILPLLK.S	1628.87	-0.00236	2	1	76.75	0	1.75e-06	0|0	sp|P22102|PUR2_HUMAN/tr|Q59HH3|Q59HH3_HUMAN/tr|Q15374|Q15374_HUMAN/tr|Q3B7A7|Q3B7A7_HUMAN		4.37	0		0	2	MASCOT		T
	R20180100087_1,15906	R.ILSGPFVQK.W	988.583	0.00035	2	1	41.76	0	0.00521	0|0	sp|P22102|PUR2_HUMAN/tr|Q59HH3|Q59HH3_HUMAN/tr|Q3B7A7|Q3B7A7_HUMAN/tr|A0A140TA71|A0A140TA71_HUMAN/tr|B4DJ93|B4DJ93_HUMAN		8.75	0		0	2	MASCOT		T
	R20180100087_1,27582	R.ITEGDVVVGIASSGLHSNGFSLVR.K	2414.27	-0.00228	3	1	74.38	0	2.25e-06	0|0	sp|P22102|PUR2_HUMAN/tr|Q59HH3|Q59HH3_HUMAN/tr|Q3B7A7|Q3B7A7_HUMAN/tr|B4DJ93|B4DJ93_HUMAN		5.32	0		0	2	MASCOT		T
	R20180100087_1,27610	R.ITEGDVVVGIASSGLHSNGFSLVR.K	2414.27	-0.00679	2	1	31.16	0	0.0474	0|0	sp|P22102|PUR2_HUMAN/tr|Q59HH3|Q59HH3_HUMAN/tr|Q3B7A7|Q3B7A7_HUMAN/tr|B4DJ93|B4DJ93_HUMAN		5.32	0		0	2	MASCOT		T
	R20180100087_1,26548	R.LLEGDGGPNTGGMGAYCPAPQVSNDLLLK.I	2944.42	-0.00502	2	1	118.03	0	9.72e-11	0|0	sp|P22102|PUR2_HUMAN/tr|Q59HH3|Q59HH3_HUMAN/tr|Q15374|Q15374_HUMAN/tr|Q3B7A7|Q3B7A7_HUMAN/tr|F8WD69|F8WD69_HUMAN		4.03	0		0	2	MASCOT		T
	R20180100087_1,19653	R.SAGVQCFGPTAEAAQLESSK.R	2037.95	-0.00174	2	1	87.94	0	2.51e-07	0|0	sp|P22102|PUR2_HUMAN/tr|C9JBJ1|C9JBJ1_HUMAN/tr|C9JTV6|C9JTV6_HUMAN/tr|C9JZG2|C9JZG2_HUMAN/tr|Q59HH3|Q59HH3_HUMAN/tr|C9JKQ7|C9JKQ7_HUMAN/tr|Q15374|Q15374_HUMAN/tr|Q3B7A7|Q3B7A7_HUMAN/tr|F8WD69|F8WD69_HUMAN		4.53	0		0	2	MASCOT		T
	R20180100087_1,19691	R.SAGVQCFGPTAEAAQLESSK.R	2037.95	0.00415	3	1	74.14	0	1.98e-06	0|0	sp|P22102|PUR2_HUMAN/tr|C9JBJ1|C9JBJ1_HUMAN/tr|C9JTV6|C9JTV6_HUMAN/tr|C9JZG2|C9JZG2_HUMAN/tr|Q59HH3|Q59HH3_HUMAN/tr|C9JKQ7|C9JKQ7_HUMAN/tr|Q15374|Q15374_HUMAN/tr|Q3B7A7|Q3B7A7_HUMAN/tr|F8WD69|F8WD69_HUMAN		4.53	0		0	2	MASCOT		T
	R20180100087_1,29606	R.TVDGMQQEGTPYTGILYAGIMLTK.N	2587.28	0.00352	2	1	91.32	0	5.57e-08	0|0	sp|P22102|PUR2_HUMAN/tr|Q59HH3|Q59HH3_HUMAN/tr|Q15374|Q15374_HUMAN/tr|Q3B7A7|Q3B7A7_HUMAN/tr|F8WD69|F8WD69_HUMAN		4.37	0		0	2	MASCOT		T
	R20180100087_1,29619	R.TVDGMQQEGTPYTGILYAGIMLTK.N	2587.28	-0.00116	2	1	62.46	0	4.33e-05	0|0	sp|P22102|PUR2_HUMAN/tr|Q59HH3|Q59HH3_HUMAN/tr|Q15374|Q15374_HUMAN/tr|Q3B7A7|Q3B7A7_HUMAN/tr|F8WD69|F8WD69_HUMAN		4.37	0		0	2	MASCOT		T
	R20180100087_1,28149	R.VAVLISGTGSNLQALIDSTR.E	2015.11	-0.00265	3	1	79.8	0	4.36e-07	0|0	sp|P22102|PUR2_HUMAN/tr|Q59HH3|Q59HH3_HUMAN/tr|Q3B7A7|Q3B7A7_HUMAN/tr|A0A140TA71|A0A140TA71_HUMAN/tr|B4DJ93|B4DJ93_HUMAN		5.81	0		0	2	MASCOT		T
	R20180100087_1,25140	R.VFSWLQQEGHLSEEEMAR.T	2176.01	-0.01217	2	1	98.19	0	3.65e-08	0|0	sp|P22102|PUR2_HUMAN/tr|Q59HH3|Q59HH3_HUMAN/tr|Q3B7A7|Q3B7A7_HUMAN/tr|B4DJ93|B4DJ93_HUMAN		4.48	0		0	2	MASCOT		T
$16-1	tr|A0A024R663|A0A024R663_HUMAN Kinectin 1 (Kinesin receptor), isoform CRA_a OS=Homo sapiens GN=KTN1 PE=4 SV=1	29	29	0.2248	156273	5.52
$16-2	sp|Q86UP2|KTN1_HUMAN Kinectin OS=Homo sapiens GN=KTN1 PE=1 SV=1	29	29	0.2248	156273	5.52
	R20180100087_1,14793	K.ALKEEIGNVQLEK.A	1470.82	0.00227	2	1	42.17	0	0.00442	0|0	sp|Q86UP2|KTN1_HUMAN/tr|H0YJZ8|H0YJZ8_HUMAN/tr|A0A024R663|A0A024R663_HUMAN/tr|G3V4Y7|G3V4Y7_HUMAN/tr|G3V5G2|G3V5G2_HUMAN		4.79	1		0	2	MASCOT		T
	R20180100087_1,14384	K.AQQSLELIQSK.I	1244.68	-0.00026	2	1	78.55	0	1.09e-06	0|0	sp|Q86UP2|KTN1_HUMAN/tr|A0A024R663|A0A024R663_HUMAN/tr|B7Z6P3|B7Z6P3_HUMAN/tr|B3KP76|B3KP76_HUMAN/tr|H0YJP2|H0YJP2_HUMAN/tr|B3KWP6|B3KWP6_HUMAN/tr|G3V4Y7|G3V4Y7_HUMAN		6.05	0		0	2	MASCOT		T
	R20180100087_1,25693	K.DFLLSLK.T	835.492	0.0008	2	1	28.55	0	0.0598	0|0	sp|Q86UP2|KTN1_HUMAN/tr|A0A024R663|A0A024R663_HUMAN		5.84	0		0	2	MASCOT		T
	R20180100087_1,6012	K.ECMAGTSGSEEVK.V	1384.57	-0.00023	2	1	31.63	0	0.00618	0|0	sp|Q86UP2|KTN1_HUMAN/tr|A0A024R663|A0A024R663_HUMAN/tr|B7Z6P3|B7Z6P3_HUMAN/tr|G3V5P0|G3V5P0_HUMAN/tr|B3KWP6|B3KWP6_HUMAN/tr|G3V4Y7|G3V4Y7_HUMAN		4.25	0		0	2	MASCOT		T
	R20180100087_1,26870	K.EEELKDIQNMNFLLK.A	1863.95	0.00432	2	1	40.25	0	0.00785	0|0	sp|Q86UP2|KTN1_HUMAN/tr|A0A024R663|A0A024R663_HUMAN		4.41	1		0	2	MASCOT		T
	R20180100087_1,13206	K.EEIGNVQLEK.A	1158.6	0.00414	2	1	26.9	0	0.234	0|0	sp|Q86UP2|KTN1_HUMAN/tr|H0YJZ8|H0YJZ8_HUMAN/tr|A0A024R663|A0A024R663_HUMAN/tr|G3V4Y7|G3V4Y7_HUMAN/tr|G3V5G2|G3V5G2_HUMAN		4.25	0		0	2	MASCOT		T
	R20180100087_1,4472	K.ENEVQSLHSK.L	1170.57	-0.00121	2	1	48.48	0	0.000692	0|0	sp|Q86UP2|KTN1_HUMAN/tr|A0A024R663|A0A024R663_HUMAN		5.4	0		0	2	MASCOT		T
	R20180100087_1,25262	K.FKDFLLSLK.T	1110.66	0.00062	2	1	30.35	0	0.0257	0|0	sp|Q86UP2|KTN1_HUMAN/tr|A0A024R663|A0A024R663_HUMAN		8.59	1		0	2	MASCOT		T
	R20180100087_1,26149	K.GELTTLIHQLQEK.D	1509.83	-0.00212	3	1	40.74	0	0.00506	0|0	sp|Q86UP2|KTN1_HUMAN/tr|A0A024R663|A0A024R663_HUMAN		5.4	0		0	2	MASCOT		T
	R20180100087_1,3600	K.GKEEQMNTMK.A	1195.54	0.00301	2	1	38.17	0	0.0135	0|0	sp|Q86UP2|KTN1_HUMAN/tr|A0A024R663|A0A024R663_HUMAN/tr|G3V4Y7|G3V4Y7_HUMAN		6.14	1		0	2	MASCOT		T
	R20180100087_1,5195	K.KVEPVPVTK.Q	996.609	-0.00016	2	1	36.82	0	0.00364	0|0	sp|Q86UP2|KTN1_HUMAN/tr|A0A024R663|A0A024R663_HUMAN		8.59	1		0	2	MASCOT		T
	R20180100087_1,16628	K.LQALANEQAAAAHELEK.M	1806.93	-0.00261	3	1	92.42	0	5.05e-08	0|0	sp|Q86UP2|KTN1_HUMAN/tr|A0A024R663|A0A024R663_HUMAN		4.75	0		0	2	MASCOT		T
	R20180100087_1,9170	K.LTDTLVSK.Q	876.504	-0.00061	2	1	45.29	0	0.00169	0|0	sp|Q86UP2|KTN1_HUMAN/tr|A0A024R663|A0A024R663_HUMAN		5.84	0		0	2	MASCOT		T
	R20180100087_1,5993	K.MEEFK.D ! K.MEEFK.I	683.307	0.00197	1	1	29.98	0	0.0663	0|0	sp|P38646|GRP75_HUMAN/tr|Q8N1C8|Q8N1C8_HUMAN/tr|B7Z4V2|B7Z4V2_HUMAN/tr|B7Z4T3|B7Z4T3_HUMAN/tr|V9HW84|V9HW84_HUMAN ! sp|Q86UP2|KTN1_HUMAN/tr|A0A024R663|A0A024R663_HUMAN		4.53	0		0	2	MASCOT		T
	R20180100087_1,6873	K.NAEQAATQLK.V	1073.56	-0.00097	2	1	40.49	0	0.00777	0|0	sp|Q86UP2|KTN1_HUMAN/tr|A0A024R663|A0A024R663_HUMAN		6	0		0	2	MASCOT		T
	R20180100087_1,15629	K.QMQSSFTSSEQELER.L	1786.79	-0.00029	2	1	74.28	0	8.98e-07	0|0	sp|Q86UP2|KTN1_HUMAN/tr|A0A024R663|A0A024R663_HUMAN/tr|B7Z6P3|B7Z6P3_HUMAN/tr|G3V5P0|G3V5P0_HUMAN/tr|B3KWP6|B3KWP6_HUMAN/tr|G3V4Y7|G3V4Y7_HUMAN		4.25	0		0	2	MASCOT		T
	R20180100087_1,27607	K.QNDQVSFASLVEELKK.V	1834.95	-0.00322	3	1	60.03	0	8.27e-05	0|0	sp|Q86UP2|KTN1_HUMAN/tr|H0YJZ8|H0YJZ8_HUMAN/tr|A0A024R663|A0A024R663_HUMAN/tr|G3V4Y7|G3V4Y7_HUMAN/tr|G3V5G2|G3V5G2_HUMAN		4.68	1		0	2	MASCOT		T
	R20180100087_1,5092	K.QPTPPSEAAASK.K	1183.6	-6e-05	2	1	56.45	0	0.00015	0|0	sp|Q86UP2|KTN1_HUMAN/tr|A0A024R663|A0A024R663_HUMAN		6	0		0	2	MASCOT		T
	R20180100087_1,2685	K.TETDKENAEVK.F	1263.61	-0.00105	2	1	36.78	0	0.227	0|0	sp|Q86UP2|KTN1_HUMAN/tr|A0A024R663|A0A024R663_HUMAN		4.41	1		0	2	MASCOT		T
	R20180100087_1,14175	K.TQLLQDVQDENK.L	1430.71	0.00563	2	1	61.13	0	5.35e-05	0|0	sp|Q86UP2|KTN1_HUMAN/tr|A0A024R663|A0A024R663_HUMAN/tr|G3V4Y7|G3V4Y7_HUMAN/tr|H0YJV5|H0YJV5_HUMAN		4.03	0		0	2	MASCOT		T
	R20180100087_1,7287	K.VISEREK.E	860.484	0.01312	2	1	21.58	0	1.13	0|0	sp|Q86UP2|KTN1_HUMAN/tr|A0A024R663|A0A024R663_HUMAN/tr|G3V4Y7|G3V4Y7_HUMAN/tr|H0YJV5|H0YJV5_HUMAN		6.11	1		0	2	MASCOT		T
	R20180100087_1,11282	R.DAVSNTTNQLESK.Q	1406.68	0.00114	2	1	55.75	0	0.000182	0|0	sp|Q86UP2|KTN1_HUMAN/tr|A0A024R663|A0A024R663_HUMAN		4.37	0		0	2	MASCOT		T
	R20180100087_1,15089	R.EQMEAEIAHLK.Q	1298.64	0.00029	3	1	28.16	0	0.102	0|0	sp|Q86UP2|KTN1_HUMAN/tr|A0A024R663|A0A024R663_HUMAN		4.75	0		0	2	MASCOT		T
	R20180100087_1,22816	R.EVIDLLKPDQVEGIQK.S	1824.01	-0.0011	2	1	75.96	0	1.02e-06	0|0	sp|Q86UP2|KTN1_HUMAN/tr|A0A024R663|A0A024R663_HUMAN		4.32	0		0	2	MASCOT		T
	R20180100087_1,6859	R.LIAAVK.G ! K.LLAAVK.E	614.424	0.00163	2	1	32.74	0	0.00607	0|0	sp|O60749|SNX2_HUMAN/tr|B3KN57|B3KN57_HUMAN/tr|Q53GG3|Q53GG3_HUMAN/tr|B3KML1|B3KML1_HUMAN ! sp|Q86UP2|KTN1_HUMAN/tr|A0A024R663|A0A024R663_HUMAN		8.75	0		0	2	MASCOT		T
	R20180100087_1,9351	R.LVNELTEK.T	945.525	-0.00031	2	1	43.82	0	0.00664	0|0	sp|Q86UP2|KTN1_HUMAN/tr|A0A024R663|A0A024R663_HUMAN		4.53	0		0	2	MASCOT		T
	R20180100087_1,17177	R.QNEELNLLK.A	1100.59	0.00145	2	1	53.83	0	0.000329	0|0	sp|Q86UP2|KTN1_HUMAN/tr|A0A024R663|A0A024R663_HUMAN		4.53	0		0	2	MASCOT		T
	R20180100087_1,12870	R.QQQVEAVELEAK.E	1371.71	8e-05	2	1	64.21	0	7.56e-05	0|0	sp|Q86UP2|KTN1_HUMAN/tr|A0A024R663|A0A024R663_HUMAN/tr|B7Z6P3|B7Z6P3_HUMAN/tr|G3V5P0|G3V5P0_HUMAN/tr|B3KWP6|B3KWP6_HUMAN/tr|G3V4Y7|G3V4Y7_HUMAN		4.25	0		0	2	MASCOT		T
	R20180100087_1,4216	R.TAEHEAAQQDLQSK.F	1555.73	0.00034	2	1	75.56	0	5.97e-06	0|0	sp|Q86UP2|KTN1_HUMAN/tr|A0A024R663|A0A024R663_HUMAN		4.65	0		0	2	MASCOT		T
$17-1	tr|V9HWK2|V9HWK2_HUMAN Epididymis luminal protein 114 OS=Homo sapiens GN=HEL114 PE=2 SV=1	32	28	0.3201	123798	5.5
$17-2	tr|A0A024QZN4|A0A024QZN4_HUMAN Vinculin, isoform CRA_c OS=Homo sapiens GN=VCL PE=4 SV=1	32	28	0.3405	116721	5.83
$17-3	sp|P18206|VINC_HUMAN Vinculin OS=Homo sapiens GN=VCL PE=1 SV=4	32	28	0.3201	123798	5.5
	R20180100087_1,31827	K.AIPDLTAPVAAVQAAVSNLVR.V ! K.AIPDLTAPVAAVQAAVSNLVR.G	2076.18	-0.00315	3	1	47.17	0	0.000342	0|0	sp|P18206|VINC_HUMAN/tr|V9HWK2|V9HWK2_HUMAN/tr|A0A024QZN4|A0A024QZN4_HUMAN/tr|B4DTM7|B4DTM7_HUMAN ! tr|A0A096LPE1|A0A096LPE1_HUMAN		5.88	0		0	2	MASCOT		T
	R20180100087_1,31855	K.AIPDLTAPVAAVQAAVSNLVR.V ! K.AIPDLTAPVAAVQAAVSNLVR.G	2076.18	-0.00477	2	1	64.21	0	2.65e-05	0|0	sp|P18206|VINC_HUMAN/tr|V9HWK2|V9HWK2_HUMAN/tr|A0A024QZN4|A0A024QZN4_HUMAN/tr|B4DTM7|B4DTM7_HUMAN ! tr|A0A096LPE1|A0A096LPE1_HUMAN		5.88	0		0	2	MASCOT		T
	R20180100087_1,18107	K.AQQVSQGLDVLTAK.V	1457.8	0.00151	2	1	87.31	0	3.7e-07	0|0	sp|P18206|VINC_HUMAN/tr|V9HWK2|V9HWK2_HUMAN/tr|B4E3Q9|B4E3Q9_HUMAN/tr|A0A024QZN4|A0A024QZN4_HUMAN/tr|B3KXA2|B3KXA2_HUMAN		5.88	0		0	2	MASCOT		T
	R20180100087_1,10983	K.AVAGNISDPGLQK.S	1269.68	-7e-05	2	1	46.69	0	0.00131	0|0	sp|P18206|VINC_HUMAN/tr|V9HWK2|V9HWK2_HUMAN/tr|B4E3Q9|B4E3Q9_HUMAN/tr|B4DKC9|B4DKC9_HUMAN/tr|A0A024QZN4|A0A024QZN4_HUMAN/tr|B3KXA2|B3KXA2_HUMAN		5.88	0		0	2	MASCOT		T
	R20180100087_1,28673	K.ELLPVLISAMK.I	1213.72	-0.00024	2	1	49.17	0	0.000579	0|0	sp|P18206|VINC_HUMAN/tr|V9HWK2|V9HWK2_HUMAN/tr|B4E3Q9|B4E3Q9_HUMAN/tr|A0A024QZN4|A0A024QZN4_HUMAN/tr|B3KXA2|B3KXA2_HUMAN		6.1	0		0	2	MASCOT		T
	R20180100087_1,14977	K.ETVQTTEDQILK.R	1404.72	0.00154	2	1	41.49	0	0.00616	0|0	sp|P18206|VINC_HUMAN/tr|V9HWK2|V9HWK2_HUMAN/tr|B4DKC9|B4DKC9_HUMAN/tr|A0A024QZN4|A0A024QZN4_HUMAN/tr|B4DTM7|B4DTM7_HUMAN		4.14	0		0	2	MASCOT		T
	R20180100087_1,15328	K.LLAVAATAPPDAPNR.E	1476.82	0.00279	2	1	57.74	0	0.000108	0|0	sp|P18206|VINC_HUMAN/tr|V9HWK2|V9HWK2_HUMAN/tr|B4E3Q9|B4E3Q9_HUMAN/tr|A0A024QZN4|A0A024QZN4_HUMAN/tr|B3KXA2|B3KXA2_HUMAN		5.84	0		0	2	MASCOT		T
	R20180100087_1,22289	K.LVQAAQMLQSDPYSVPAR.D ! K.LVQAAQMLQSDPYSVPAR.I	1974.01	0.00836	3	1	41.95	0	0.00773	0|0	sp|P18206|VINC_HUMAN/tr|V9HWK2|V9HWK2_HUMAN/tr|A0A024QZN4|A0A024QZN4_HUMAN/tr|B4DTM7|B4DTM7_HUMAN/tr|B3KXA2|B3KXA2_HUMAN ! tr|B4DKC9|B4DKC9_HUMAN		5.84	0		0	2	MASCOT		T
	R20180100087_1,20564	K.MLGQMTDQVADLR.A	1477.71	0.00451	2	1	61.75	0	4.4e-05	0|0	sp|P18206|VINC_HUMAN/tr|V9HWK2|V9HWK2_HUMAN/tr|B4E3Q9|B4E3Q9_HUMAN/tr|A0A024QZN4|A0A024QZN4_HUMAN		4.21	0		0	2	MASCOT		T
	R20180100087_1,17916	K.MTGLVDEAIDTK.S	1292.64	0.00366	2	1	38.34	0	0.0111	0|0	sp|P18206|VINC_HUMAN/tr|V9HWK2|V9HWK2_HUMAN/tr|B4E3Q9|B4E3Q9_HUMAN/tr|B4DKC9|B4DKC9_HUMAN/tr|A0A024QZN4|A0A024QZN4_HUMAN/tr|B3KXA2|B3KXA2_HUMAN		4.03	0		0	2	MASCOT		T
	R20180100087_1,6639	K.NLGPGMTK.M	817.424	-0.00222	2	1	21.86	0	0.637	0|0	sp|P18206|VINC_HUMAN/tr|V9HWK2|V9HWK2_HUMAN/tr|B4E3Q9|B4E3Q9_HUMAN/tr|A0A024QZN4|A0A024QZN4_HUMAN/tr|B3KXA2|B3KXA2_HUMAN		8.75	0		0	2	MASCOT		T
	R20180100087_1,14669	K.NQWIDNVEK.M	1145.56	0.00098	2	1	21.84	0	0.34	0|0	sp|P18206|VINC_HUMAN/tr|V9HWK2|V9HWK2_HUMAN/tr|B4E3Q9|B4E3Q9_HUMAN/tr|B4DKC9|B4DKC9_HUMAN/tr|A0A024QZN4|A0A024QZN4_HUMAN/tr|B3KXA2|B3KXA2_HUMAN		4.37	0		0	2	MASCOT		T
	R20180100087_1,14259	K.QVATALQNLQTK.T	1314.74	0.00133	2	1	69.91	0	8.85e-06	0|0	sp|P18206|VINC_HUMAN/tr|V9HWK2|V9HWK2_HUMAN/tr|B4E3Q9|B4E3Q9_HUMAN/tr|A0A024QZN4|A0A024QZN4_HUMAN/tr|B3KXA2|B3KXA2_HUMAN		8.75	0		0	2	MASCOT		T
	R20180100087_1,19016	K.SLLDASEEAIK.K	1175.62	9e-05	2	1	46.72	0	0.00201	0|0	sp|P18206|VINC_HUMAN/tr|V9HWK2|V9HWK2_HUMAN/tr|B4E3Q9|B4E3Q9_HUMAN/tr|B4DKC9|B4DKC9_HUMAN/tr|A0A024QZN4|A0A024QZN4_HUMAN/tr|B3KXA2|B3KXA2_HUMAN		4.14	0		0	2	MASCOT		T
	R20180100087_1,16403	K.SLLDASEEAIKK.D	1303.71	-0.0068	2	1	34.05	0	0.0296	0|0	sp|P18206|VINC_HUMAN/tr|V9HWK2|V9HWK2_HUMAN/tr|B4E3Q9|B4E3Q9_HUMAN/tr|B4DKC9|B4DKC9_HUMAN/tr|A0A024QZN4|A0A024QZN4_HUMAN/tr|B3KXA2|B3KXA2_HUMAN		4.68	1		0	2	MASCOT		T
	R20180100087_1,14868	K.TISPMVMDAK.A	1092.54	0.00324	2	1	34.51	0	0.028	0|0	sp|P18206|VINC_HUMAN/tr|V9HWK2|V9HWK2_HUMAN/tr|B4E3Q9|B4E3Q9_HUMAN/tr|B4DKC9|B4DKC9_HUMAN/tr|A0A024QZN4|A0A024QZN4_HUMAN/tr|B3KXA2|B3KXA2_HUMAN		5.5	0		0	2	MASCOT		T
	R20180100087_1,5035	K.VGELCAGK.E	833.419	-0.00114	2	1	45.07	0	0.00293	0|0	sp|P18206|VINC_HUMAN/tr|V9HWK2|V9HWK2_HUMAN/tr|B4E3Q9|B4E3Q9_HUMAN/tr|A0A024QZN4|A0A024QZN4_HUMAN/tr|B3KXA2|B3KXA2_HUMAN		5.97	0		0	2	MASCOT		T
	R20180100087_1,9278	R.DPSASPGDAGEQAIR.Q	1470.68	-0.00137	2	1	59.88	0	6.49e-05	0|0	sp|P18206|VINC_HUMAN/tr|V9HWK2|V9HWK2_HUMAN/tr|B4E3Q9|B4E3Q9_HUMAN/tr|A0A024QZN4|A0A024QZN4_HUMAN/tr|B3KXA2|B3KXA2_HUMAN		4.03	0		0	2	MASCOT		T
	R20180100087_1,12552	R.DYLIDGSR.G	938.458	-0.00092	1	1	25.58	0	0.855	0|0	sp|P18206|VINC_HUMAN/tr|V9HWK2|V9HWK2_HUMAN/tr|B4E3Q9|B4E3Q9_HUMAN/tr|A0A024QZN4|A0A024QZN4_HUMAN/tr|B4DTM7|B4DTM7_HUMAN/tr|B3KXA2|B3KXA2_HUMAN		4.21	0		0	2	MASCOT		T
	R20180100087_1,12973	R.ELTPQVVSAAR.I	1170.65	-0.00098	2	1	45.12	0	0.0041	0|0	sp|P18206|VINC_HUMAN/tr|V9HWK2|V9HWK2_HUMAN/tr|B4E3Q9|B4E3Q9_HUMAN/tr|A0A024QZN4|A0A024QZN4_HUMAN/tr|B3KXA2|B3KXA2_HUMAN		6.1	0		0	2	MASCOT		T
	R20180100087_1,29829	R.GILSGTSDLLLTFDEAEVR.K ! R.GILSGTSDLLLTFDEAEVR.R	2036.05	-0.01142	2	1	159.21	0	8.13e-15	0|0	sp|P18206|VINC_HUMAN/tr|V9HWK2|V9HWK2_HUMAN/tr|A0A024QZN4|A0A024QZN4_HUMAN/tr|B3KXA2|B3KXA2_HUMAN ! tr|B4E3Q9|B4E3Q9_HUMAN		3.92	0		0	2	MASCOT		T
	R20180100087_1,27186	R.MQEAMTQEVSDVFSDTTTPIK.L	2358.08	-0.00272	2	1	123.98	0	1.88e-11	0|0	sp|P18206|VINC_HUMAN/tr|V9HWK2|V9HWK2_HUMAN/tr|B4E3Q9|B4E3Q9_HUMAN/tr|A0A024QZN4|A0A024QZN4_HUMAN/tr|B3KXA2|B3KXA2_HUMAN		3.92	0		0	2	MASCOT		T
	R20180100087_1,13966	R.NPGNQAAYEHFETMK.N	1736.77	0.00042	3	1	31.9	0	0.0185	0|0	sp|P18206|VINC_HUMAN/tr|V9HWK2|V9HWK2_HUMAN/tr|B4E3Q9|B4E3Q9_HUMAN/tr|B4DKC9|B4DKC9_HUMAN/tr|A0A024QZN4|A0A024QZN4_HUMAN/tr|B3KXA2|B3KXA2_HUMAN		5.4	0		0	2	MASCOT		T
	R20180100087_1,13984	R.NPGNQAAYEHFETMK.N	1736.77	-0.00094	2	1	113.35	0	1.34e-10	0|0	sp|P18206|VINC_HUMAN/tr|V9HWK2|V9HWK2_HUMAN/tr|B4E3Q9|B4E3Q9_HUMAN/tr|B4DKC9|B4DKC9_HUMAN/tr|A0A024QZN4|A0A024QZN4_HUMAN/tr|B3KXA2|B3KXA2_HUMAN		5.4	0		0	2	MASCOT		T
	R20180100087_1,17898	R.SLGEISALTSK.L	1105.61	0.00618	2	1	48.3	0	0.00355	0|0	sp|P18206|VINC_HUMAN/tr|V9HWK2|V9HWK2_HUMAN/tr|B4E3Q9|B4E3Q9_HUMAN/tr|A0A024QZN4|A0A024QZN4_HUMAN/tr|B3KXA2|B3KXA2_HUMAN		5.72	0		0	2	MASCOT		T
	R20180100087_1,13030	R.TDAGFTLR.W	880.452	0.00073	2	1	37.29	0	0.0142	0|0	sp|P18206|VINC_HUMAN/tr|V9HWK2|V9HWK2_HUMAN/tr|B4DKC9|B4DKC9_HUMAN/tr|A0A024QZN4|A0A024QZN4_HUMAN/tr|B4DTM7|B4DTM7_HUMAN		5.5	0		0	2	MASCOT		T
	R20180100087_1,30520	R.TIESILEPVAQQISHLVIM*HEEGEVDGK.A	3117.58	-0.00101	4	1	36.95	0	0.0125	0|0	sp|P18206|VINC_HUMAN/tr|A0A096LPE1|A0A096LPE1_HUMAN/tr|V9HWK2|V9HWK2_HUMAN/tr|B4DKC9|B4DKC9_HUMAN/tr|A0A024QZN4|A0A024QZN4_HUMAN/tr|B4DTM7|B4DTM7_HUMAN		4.41	0	15.994919 Oxidation (M)	0	2	MASCOT		T
	R20180100087_1,30897	R.TIESILEPVAQQISHLVIMHEEGEVDGK.A	3101.58	0.00207	4	1	42.2	0	0.00375	0|0	sp|P18206|VINC_HUMAN/tr|A0A096LPE1|A0A096LPE1_HUMAN/tr|V9HWK2|V9HWK2_HUMAN/tr|B4DKC9|B4DKC9_HUMAN/tr|A0A024QZN4|A0A024QZN4_HUMAN/tr|B4DTM7|B4DTM7_HUMAN		4.41	0		0	2	MASCOT		T
	R20180100087_1,25911	R.VDQLTAQLADLAAR.G	1484.81	-0.00131	2	1	99.71	0	9.57e-09	0|0	sp|P18206|VINC_HUMAN/tr|V9HWK2|V9HWK2_HUMAN/tr|B4E3Q9|B4E3Q9_HUMAN/tr|A0A024QZN4|A0A024QZN4_HUMAN/tr|B3KXA2|B3KXA2_HUMAN		4.21	0		0	2	MASCOT		T
	R20180100087_1,25958	R.VDQLTAQLADLAAR.G	1484.81	-0.00333	3	1	70.22	0	8.37e-06	0|0	sp|P18206|VINC_HUMAN/tr|V9HWK2|V9HWK2_HUMAN/tr|B4E3Q9|B4E3Q9_HUMAN/tr|A0A024QZN4|A0A024QZN4_HUMAN/tr|B3KXA2|B3KXA2_HUMAN		4.21	0		0	2	MASCOT		T
	R20180100087_1,26887	R.VLQLTSWDEDAWASK.D	1748.85	0.00364	2	1	88.14	0	9.65e-08	0|0	sp|P18206|VINC_HUMAN/tr|V9HWK2|V9HWK2_HUMAN/tr|B4E3Q9|B4E3Q9_HUMAN/tr|A0A024QZN4|A0A024QZN4_HUMAN/tr|B3KXA2|B3KXA2_HUMAN		4.03	0		0	2	MASCOT		T
	R20180100087_1,13851	R.WIDNPTVDDR.G	1230.57	-0.00058	2	1	77.29	0	6.94e-07	0|0	sp|P18206|VINC_HUMAN/tr|V9HWK2|V9HWK2_HUMAN/tr|B4E3Q9|B4E3Q9_HUMAN/tr|A0A024QZN4|A0A024QZN4_HUMAN/tr|B3KXA2|B3KXA2_HUMAN		3.93	0		0	2	MASCOT		T
$18-1	sp|P50990|TCPQ_HUMAN T-complex protein 1 subunit theta OS=Homo sapiens GN=CCT8 PE=1 SV=4	30	28	0.5839	59619.9	5.42
	R20180100087_1,18049	K.AHEILPNLVCCSAK.N	1611.8	-0.00145	2	1	55.92	0	0.000183	0|0	sp|P50990|TCPQ_HUMAN/tr|H7C4C8|H7C4C8_HUMAN/tr|Q7Z759|Q7Z759_HUMAN/tr|Q53HU0|Q53HU0_HUMAN		6.77	0		0	2	MASCOT		T
	R20180100087_1,12594	K.AIADTGANVVVTGGK.V	1372.74	-6e-05	2	1	77.7	0	1.54e-06	0|0	sp|P50990|TCPQ_HUMAN/tr|H7C4C8|H7C4C8_HUMAN/tr|Q7Z759|Q7Z759_HUMAN/tr|Q53HU0|Q53HU0_HUMAN		5.88	0		0	2	MASCOT		T
	R20180100087_1,27483	K.DM*LEAGILDTYLGK.Y	1554.77	-0.00551	2	1	65.08	0	3.01e-05	0|0	sp|P50990|TCPQ_HUMAN/tr|Q7Z759|Q7Z759_HUMAN/tr|Q53HU0|Q53HU0_HUMAN/tr|H7C2U0|H7C2U0_HUMAN		4.03	0	15.994919 Oxidation (M)	0	2	MASCOT		T
	R20180100087_1,19590	K.EDGAISTIVLR.G	1173.65	0.00188	2	1	41.11	0	0.0152	0|0	sp|P50990|TCPQ_HUMAN/tr|Q7Z759|Q7Z759_HUMAN/tr|Q53HU0|Q53HU0_HUMAN		4.37	0		0	2	MASCOT		T
	R20180100087_1,5397	K.ETEGDVTSVK.D	1064.51	0.00073	2	1	44.86	0	0.00203	0|0	sp|P50990|TCPQ_HUMAN/tr|Q7Z759|Q7Z759_HUMAN/tr|Q53HU0|Q53HU0_HUMAN		4.14	0		0	2	MASCOT		T
	R20180100087_1,20921	K.FAEAFEAIPR.A	1150.59	-0.00028	2	1	60.48	0	6.48e-05	0|0	sp|P50990|TCPQ_HUMAN/tr|Q7Z759|Q7Z759_HUMAN/tr|Q53HU0|Q53HU0_HUMAN		4.53	0		0	2	MASCOT		T
	R20180100087_1,7725	K.GEENLM*DAQVK.A	1249.57	0.00155	2	1	48.84	0	0.00153	0|0	sp|P50990|TCPQ_HUMAN/tr|H7C4C8|H7C4C8_HUMAN/tr|Q7Z759|Q7Z759_HUMAN/tr|Q53HU0|Q53HU0_HUMAN		4.14	0	15.994919 Oxidation (M)	0	2	MASCOT		T
	R20180100087_1,14407	K.HEKEDGAISTIVLR.G	1567.84	0.00056	2	1	63.64	0	3.05e-05	0|0	sp|P50990|TCPQ_HUMAN/tr|Q7Z759|Q7Z759_HUMAN/tr|Q53HU0|Q53HU0_HUMAN		5.45	1		0	2	MASCOT		T
	R20180100087_1,15516	K.HFSGLEEAVYR.N	1307.64	0.00084	2	1	71.68	0	4.84e-06	0|0	sp|P50990|TCPQ_HUMAN/tr|H7C4C8|H7C4C8_HUMAN/tr|Q53HU0|Q53HU0_HUMAN		5.4	0		0	2	MASCOT		T
	R20180100087_1,21110	K.IAVYSCPFDGM*ITETK.G	1847.86	-0.00594	2	1	25.9	0	0.127	0|0	sp|P50990|TCPQ_HUMAN/tr|Q7Z759|Q7Z759_HUMAN/tr|Q53HU0|Q53HU0_HUMAN		4.37	0	15.994919 Oxidation (M)	0	2	MASCOT		T
	R20180100087_1,25903	K.ILGSGISSSSVLHGMVFK.K	1818.98	0.00023	3	1	63.44	0	3.28e-05	0|0	sp|P50990|TCPQ_HUMAN/tr|Q7Z759|Q7Z759_HUMAN/tr|Q53HU0|Q53HU0_HUMAN		8.76	0		0	2	MASCOT		T
	R20180100087_1,5483	K.KDWDDDQND.-	1150.43	0.00354	2	1	30.47	0	0.00121	0|0	sp|P50990|TCPQ_HUMAN/tr|Q7Z759|Q7Z759_HUMAN/tr|Q53HU0|Q53HU0_HUMAN/tr|H7C2U0|H7C2U0_HUMAN		3.82	1		0	2	MASCOT		T
	R20180100087_1,3994	K.KETEGDVTSVK.D	1192.61	-0.00375	2	1	74.91	0	2.65e-06	0|0	sp|P50990|TCPQ_HUMAN/tr|Q7Z759|Q7Z759_HUMAN/tr|Q53HU0|Q53HU0_HUMAN		4.68	1		0	2	MASCOT		T
	R20180100087_1,15763	K.LATNAAVTVLR.V	1128.67	-0.0002	2	1	63.23	0	2.74e-05	0|0	sp|P50990|TCPQ_HUMAN/tr|Q7Z759|Q7Z759_HUMAN/tr|Q53HU0|Q53HU0_HUMAN/tr|H7C2U0|H7C2U0_HUMAN		9.75	0		0	2	MASCOT		T
	R20180100087_1,24269	K.LFVTNDAATILR.E	1333.75	-0.00121	2	1	67.78	0	1.1e-05	0|0	sp|P50990|TCPQ_HUMAN/tr|H7C4C8|H7C4C8_HUMAN/tr|Q7Z759|Q7Z759_HUMAN/tr|Q53HU0|Q53HU0_HUMAN		5.84	0		0	2	MASCOT		T
	R20180100087_1,26866	K.LIAQACVSIFPDSGHFNVDNIR.V	2473.23	-0.00126	3	1	51.29	0	0.000525	0|0	sp|P50990|TCPQ_HUMAN/tr|H7C4C8|H7C4C8_HUMAN/tr|Q7Z759|Q7Z759_HUMAN		5.21	0		0	2	MASCOT		T
	R20180100087_1,4740	K.LYAVHQEGNK.N	1158.59	0.00043	3	1	34.53	0	0.0394	0|0	sp|P50990|TCPQ_HUMAN/tr|Q7Z759|Q7Z759_HUMAN/tr|Q53HU0|Q53HU0_HUMAN/tr|H7C2U0|H7C2U0_HUMAN		6.75	0		0	2	MASCOT		T
	R20180100087_1,4763	K.LYAVHQEGNK.N	1158.59	-0.00062	1	1	32.43	0	0.138	0|0	sp|P50990|TCPQ_HUMAN/tr|Q7Z759|Q7Z759_HUMAN/tr|Q53HU0|Q53HU0_HUMAN/tr|H7C2U0|H7C2U0_HUMAN		6.75	0		0	2	MASCOT		T
	R20180100087_1,23892	K.NVGLDIEAEVPAVK.D	1453.79	0.00235	2	1	32.81	0	0.0824	0|0	sp|P50990|TCPQ_HUMAN/tr|Q7Z759|Q7Z759_HUMAN/tr|Q53HU0|Q53HU0_HUMAN/tr|H7C2U0|H7C2U0_HUMAN		4.14	0		0	2	MASCOT		T
	R20180100087_1,21145	K.QITSYGETCPGLEQYAIK.K	2057.98	-0.00167	2	1	95.61	0	1.7e-08	0|0	sp|P50990|TCPQ_HUMAN/tr|Q7Z759|Q7Z759_HUMAN/tr|Q53HU0|Q53HU0_HUMAN		4.53	0		0	2	MASCOT		T
	R20180100087_1,15868	K.QYGNEVFLAK.L	1168.6	-0.00504	2	1	31.75	0	0.0469	0|0	sp|P50990|TCPQ_HUMAN/tr|H7C4C8|H7C4C8_HUMAN/tr|Q7Z759|Q7Z759_HUMAN/tr|Q53HU0|Q53HU0_HUMAN		6	0		0	2	MASCOT		T
	R20180100087_1,17444	K.TAEELMNFSK.G	1169.55	-0.00129	2	1	49.62	0	0.00107	0|0	sp|P50990|TCPQ_HUMAN/tr|H7C4C8|H7C4C8_HUMAN/tr|Q7Z759|Q7Z759_HUMAN/tr|Q53HU0|Q53HU0_HUMAN		4.53	0		0	2	MASCOT		T
	R20180100087_1,9100	K.TVGATALPR.L	885.515	-0.00272	2	1	48.93	0	0.000661	0|0	sp|P50990|TCPQ_HUMAN/tr|H7C4C8|H7C4C8_HUMAN/tr|Q7Z759|Q7Z759_HUMAN/tr|Q53HU0|Q53HU0_HUMAN		9.41	0		0	2	MASCOT		T
	R20180100087_1,14021	K.YWAIK.L	680.377	-0.0002	2	1	22.39	0	0.228	0|0	sp|P50990|TCPQ_HUMAN/tr|Q7Z759|Q7Z759_HUMAN/tr|Q53HU0|Q53HU0_HUMAN/tr|H7C2U0|H7C2U0_HUMAN		8.59	0		0	2	MASCOT		T
	R20180100087_1,10682	R.AVDDGVNTFK.V	1065.52	0.00233	2	1	44.86	0	0.00229	0|0	sp|P50990|TCPQ_HUMAN/tr|Q7Z759|Q7Z759_HUMAN/tr|Q53HU0|Q53HU0_HUMAN		4.21	0		0	2	MASCOT		T
	R20180100087_1,24107	R.DIDEVSSLLR.T	1146.6	-0.00064	2	1	41.15	0	0.0145	0|0	sp|P50990|TCPQ_HUMAN/tr|H7C4C8|H7C4C8_HUMAN/tr|Q7Z759|Q7Z759_HUMAN/tr|Q53HU0|Q53HU0_HUMAN		4.03	0		0	2	MASCOT		T
	R20180100087_1,5417	R.ELEVQHPAAK.M	1121.59	-0.00494	2	1	51.65	0	0.000518	0|0	sp|P50990|TCPQ_HUMAN/tr|H7C4C8|H7C4C8_HUMAN/tr|Q7Z759|Q7Z759_HUMAN/tr|Q53HU0|Q53HU0_HUMAN		5.4	0		0	2	MASCOT		T
	R20180100087_1,12405	R.GSTDNLM*DDIER.A	1381.59	0.00265	2	1	46.77	0	0.000283	0|0	sp|P50990|TCPQ_HUMAN/tr|Q7Z759|Q7Z759_HUMAN/tr|Q53HU0|Q53HU0_HUMAN		3.84	0	15.994919 Oxidation (M)	0	2	MASCOT		T
	R20180100087_1,19416	R.GSTDNLMDDIER.A	1365.6	0.00103	2	1	81.61	0	1.26e-07	0|0	sp|P50990|TCPQ_HUMAN/tr|Q7Z759|Q7Z759_HUMAN/tr|Q53HU0|Q53HU0_HUMAN		3.84	0		0	2	MASCOT		T
	R20180100087_1,17467	R.LVPGGGATEIELAK.Q	1354.76	-0.0031	2	1	48.26	0	0.000802	0|0	sp|P50990|TCPQ_HUMAN/tr|Q7Z759|Q7Z759_HUMAN/tr|Q53HU0|Q53HU0_HUMAN		4.53	0		0	2	MASCOT		T
$19-1	tr|Q96IS6|Q96IS6_HUMAN HSPA8 protein (Fragment) OS=Homo sapiens GN=HSPA8 PE=1 SV=2	46	27	0.5911	64672.3	5.36
	R20180100087_1,15332	-.AMNPTNTVFDAK.R	1308.63	0.00653	2	1	49.64	0	0.000648	0|0	tr|Q96IS6|Q96IS6_HUMAN		5.88	0		0	2	MASCOT		T
	R20180100087_1,24849	K.CNEIINWLDK.N	1304.63	0.0028	2	1	26.09	0	0.193	0|0	sp|P11142|HSP7C_HUMAN/tr|Q96H53|Q96H53_HUMAN/tr|V9HW22|V9HW22_HUMAN/tr|A8K7Q2|A8K7Q2_HUMAN/tr|Q53GZ6|Q53GZ6_HUMAN/tr|E9PKE3|E9PKE3_HUMAN/tr|Q96BE0|Q96BE0_HUMAN/tr|B3KTV0|B3KTV0_HUMAN/tr|E9PM13|E9PM13_HUMAN/tr|E9PS65|E9PS65_HUMAN/tr|B4E1Q1|B4E1Q1_HUMAN/tr|E9PNE6|E9PNE6_HUMAN/tr|Q9NWW3|Q9NWW3_HUMAN/tr|Q9NZ87|Q9NZ87_HUMAN/tr|Q96IS6|Q96IS6_HUMAN		4.37	0		0	2	MASCOT		T
	R20180100087_1,26428	K.CNEIINWLDK.N	1304.63	-0.00124	2	1	61.06	0	4.91e-05	0|0	sp|P11142|HSP7C_HUMAN/tr|Q96H53|Q96H53_HUMAN/tr|V9HW22|V9HW22_HUMAN/tr|A8K7Q2|A8K7Q2_HUMAN/tr|Q53GZ6|Q53GZ6_HUMAN/tr|E9PKE3|E9PKE3_HUMAN/tr|Q96BE0|Q96BE0_HUMAN/tr|B3KTV0|B3KTV0_HUMAN/tr|E9PM13|E9PM13_HUMAN/tr|E9PS65|E9PS65_HUMAN/tr|B4E1Q1|B4E1Q1_HUMAN/tr|E9PNE6|E9PNE6_HUMAN/tr|Q9NWW3|Q9NWW3_HUMAN/tr|Q9NZ87|Q9NZ87_HUMAN/tr|Q96IS6|Q96IS6_HUMAN		4.37	0		0	2	MASCOT		T
	R20180100087_1,29786	K.CNEIINWLDK.N	1304.63	-0.00128	2	1	39.57	0	0.00692	0|0	sp|P11142|HSP7C_HUMAN/tr|Q96H53|Q96H53_HUMAN/tr|V9HW22|V9HW22_HUMAN/tr|A8K7Q2|A8K7Q2_HUMAN/tr|Q53GZ6|Q53GZ6_HUMAN/tr|E9PKE3|E9PKE3_HUMAN/tr|Q96BE0|Q96BE0_HUMAN/tr|B3KTV0|B3KTV0_HUMAN/tr|E9PM13|E9PM13_HUMAN/tr|E9PS65|E9PS65_HUMAN/tr|B4E1Q1|B4E1Q1_HUMAN/tr|E9PNE6|E9PNE6_HUMAN/tr|Q9NWW3|Q9NWW3_HUMAN/tr|Q9NZ87|Q9NZ87_HUMAN/tr|Q96IS6|Q96IS6_HUMAN		4.37	0		0	2	MASCOT		T
	R20180100087_1,22967	K.DAGTIAGLNVLR.I ! K.DAGTIAGLNVLR.-	1199.67	-0.00232	3	1	57.2	0	0.000147	0|0	sp|P11142|HSP7C_HUMAN/tr|V9HW22|V9HW22_HUMAN/tr|Q53GZ6|Q53GZ6_HUMAN/tr|E9PKE3|E9PKE3_HUMAN/tr|B3KTV0|B3KTV0_HUMAN/tr|Q53HF2|Q53HF2_HUMAN/tr|E9PK54|E9PK54_HUMAN/tr|B4E1Q1|B4E1Q1_HUMAN/tr|E9PLF4|E9PLF4_HUMAN/tr|E9PN89|E9PN89_HUMAN/tr|A4D111|A4D111_HUMAN/tr|E9PI65|E9PI65_HUMAN/tr|E9PQK7|E9PQK7_HUMAN/tr|B4DTX2|B4DTX2_HUMAN/tr|Q96IS6|Q96IS6_HUMAN ! tr|E9PQQ4|E9PQQ4_HUMAN		5.84	0		0	2	MASCOT		T
	R20180100087_1,7586	K.DNNLLGK.F	773.415	0.00017	2	1	25.9	0	0.38	0|0	sp|P54652|HSP72_HUMAN/sp|P11142|HSP7C_HUMAN/tr|Q96H53|Q96H53_HUMAN/tr|V9HW22|V9HW22_HUMAN/tr|A8K7Q2|A8K7Q2_HUMAN/tr|Q53GZ6|Q53GZ6_HUMAN/tr|B3KUS2|B3KUS2_HUMAN/tr|E9PKE3|E9PKE3_HUMAN/tr|Q96BE0|Q96BE0_HUMAN/tr|B3KTV0|B3KTV0_HUMAN/tr|E9PM13|E9PM13_HUMAN/tr|Q53HF2|Q53HF2_HUMAN/tr|E9PS65|E9PS65_HUMAN/tr|B4E1Q1|B4E1Q1_HUMAN/tr|A4D110|A4D110_HUMAN/tr|A0A024R6B5|A0A024R6B5_HUMAN/tr|E9PNE6|E9PNE6_HUMAN/tr…		5.84	0		0	2	MASCOT		T
	R20180100087_1,14156	K.EIAEAYLGK.T ! K.EIAEAYLGK.A ! K.EIAEAYLGK.-	993.525	-0.00203	2	1	23.27	0	0.931	0|0	sp|P11142|HSP7C_HUMAN/tr|V9HW22|V9HW22_HUMAN/tr|Q53GZ6|Q53GZ6_HUMAN/tr|E9PQQ4|E9PQQ4_HUMAN/tr|B3KTV0|B3KTV0_HUMAN/tr|Q53HF2|Q53HF2_HUMAN/tr|E9PK54|E9PK54_HUMAN/tr|E9PLF4|E9PLF4_HUMAN/tr|E9PN89|E9PN89_HUMAN/tr|A4D111|A4D111_HUMAN/tr|E9PI65|E9PI65_HUMAN/tr|E9PQK7|E9PQK7_HUMAN/tr|B4DTX2|B4DTX2_HUMAN/tr|Q96IS6|Q96IS6_HUMAN ! tr|E9PKE3|E9PKE3_HUMAN ! tr|E9PPY6|E9PPY6_HUMAN		4.53	0		0	2	MASCOT		T
	R20180100087_1,26604	K.ILDKCNEIINWLDK.N	1773.92	-0.0027	3	1	26.42	0	0.199	0|0	sp|P11142|HSP7C_HUMAN/tr|Q96H53|Q96H53_HUMAN/tr|V9HW22|V9HW22_HUMAN/tr|A8K7Q2|A8K7Q2_HUMAN/tr|Q53GZ6|Q53GZ6_HUMAN/tr|E9PKE3|E9PKE3_HUMAN/tr|Q96BE0|Q96BE0_HUMAN/tr|B3KTV0|B3KTV0_HUMAN/tr|E9PM13|E9PM13_HUMAN/tr|E9PS65|E9PS65_HUMAN/tr|B4E1Q1|B4E1Q1_HUMAN/tr|E9PNE6|E9PNE6_HUMAN/tr|Q9NWW3|Q9NWW3_HUMAN/tr|Q9NZ87|Q9NZ87_HUMAN/tr|Q96IS6|Q96IS6_HUMAN		4.56	1		0	2	MASCOT		T
	R20180100087_1,4454	K.ITITNDKGR.L	1017.57	0.00076	2	1	38.57	0	0.0137	0|0	sp|P34931|HS71L_HUMAN/sp|P54652|HSP72_HUMAN/sp|P0DMV8|HS71A_HUMAN/sp|P0DMV9|HS71B_HUMAN/sp|P11142|HSP7C_HUMAN/sp|P17066|HSP76_HUMAN/tr|A0A0G2JIW1|A0A0G2JIW1_HUMAN/tr|V9GZ37|V9GZ37_HUMAN/tr|B4DVU9|B4DVU9_HUMAN/tr|Q96H53|Q96H53_HUMAN/tr|B4DNT8|B4DNT8_HUMAN/tr|B4DI54|B4DI54_HUMAN/tr|Q53FA3|Q53FA3_HUMAN/tr|V9HW22|V9HW22_HUMAN/tr|A8K7Q2|A8K7Q2_HUMAN/tr|Q53GZ6|Q53GZ6_HUMAN/tr|B3KUS2|B3KUS2_HUMAN/tr|E9P…		8.75	1		0	2	MASCOT		T
	R20180100087_1,4482	K.ITITNDKGR.L	1017.57	0.00126	3	1	22.31	0	0.61	0|0	sp|P34931|HS71L_HUMAN/sp|P54652|HSP72_HUMAN/sp|P0DMV8|HS71A_HUMAN/sp|P0DMV9|HS71B_HUMAN/sp|P11142|HSP7C_HUMAN/sp|P17066|HSP76_HUMAN/tr|A0A0G2JIW1|A0A0G2JIW1_HUMAN/tr|V9GZ37|V9GZ37_HUMAN/tr|B4DVU9|B4DVU9_HUMAN/tr|Q96H53|Q96H53_HUMAN/tr|B4DNT8|B4DNT8_HUMAN/tr|B4DI54|B4DI54_HUMAN/tr|Q53FA3|Q53FA3_HUMAN/tr|V9HW22|V9HW22_HUMAN/tr|A8K7Q2|A8K7Q2_HUMAN/tr|Q53GZ6|Q53GZ6_HUMAN/tr|B3KUS2|B3KUS2_HUMAN/tr|E9P…		8.75	1		0	2	MASCOT		T
	R20180100087_1,23255	K.LLQDFFNGK.E	1081.57	0.00145	2	1	54.95	0	0.000241	0|0	sp|P54652|HSP72_HUMAN/sp|P11142|HSP7C_HUMAN/sp|P17066|HSP76_HUMAN/tr|V9HW22|V9HW22_HUMAN/tr|A8K7Q2|A8K7Q2_HUMAN/tr|Q53GZ6|Q53GZ6_HUMAN/tr|B3KUS2|B3KUS2_HUMAN/tr|E9PKE3|E9PKE3_HUMAN/tr|B3KTV0|B3KTV0_HUMAN/tr|Q53FC7|Q53FC7_HUMAN/tr|B4DHP5|B4DHP5_HUMAN/tr|B3KSM6|B3KSM6_HUMAN/tr|Q53HF2|Q53HF2_HUMAN/tr|B4E1Q1|B4E1Q1_HUMAN/tr|E9PN89|E9PN89_HUMAN/tr|A0A024R6B5|A0A024R6B5_HUMAN/tr|E9PNE6|E9PNE6_HUMAN/tr|…		5.84	0		0	2	MASCOT		T
	R20180100087_1,14533	K.MKEIAEAYLGK.T ! K.MKEIAEAYLGK.A ! K.MKEIAEAYLGK.-	1252.66	0.00099	2	1	67.2	0	1.57e-05	0|0	sp|P11142|HSP7C_HUMAN/tr|V9HW22|V9HW22_HUMAN/tr|Q53GZ6|Q53GZ6_HUMAN/tr|E9PQQ4|E9PQQ4_HUMAN/tr|B3KTV0|B3KTV0_HUMAN/tr|Q53HF2|Q53HF2_HUMAN/tr|E9PK54|E9PK54_HUMAN/tr|E9PLF4|E9PLF4_HUMAN/tr|E9PN89|E9PN89_HUMAN/tr|A4D111|A4D111_HUMAN/tr|E9PI65|E9PI65_HUMAN/tr|E9PQK7|E9PQK7_HUMAN/tr|B4DTX2|B4DTX2_HUMAN/tr|Q96IS6|Q96IS6_HUMAN ! tr|E9PKE3|E9PKE3_HUMAN ! tr|E9PPY6|E9PPY6_HUMAN		5.9	1		0	2	MASCOT		T
	R20180100087_1,4080	K.NQTAEKEEFEHQQK.E	1745.81	-0.0015	3	1	39.76	0	0.00498	0|0	sp|P11142|HSP7C_HUMAN/tr|Q96H53|Q96H53_HUMAN/tr|V9HW22|V9HW22_HUMAN/tr|A8K7Q2|A8K7Q2_HUMAN/tr|Q53GZ6|Q53GZ6_HUMAN/tr|E9PKE3|E9PKE3_HUMAN/tr|Q96BE0|Q96BE0_HUMAN/tr|B3KTV0|B3KTV0_HUMAN/tr|E9PM13|E9PM13_HUMAN/tr|E9PS65|E9PS65_HUMAN/tr|B4E1Q1|B4E1Q1_HUMAN/tr|E9PNE6|E9PNE6_HUMAN/tr|Q9NWW3|Q9NWW3_HUMAN/tr|Q9NZ87|Q9NZ87_HUMAN/tr|Q96IS6|Q96IS6_HUMAN		4.91	1		0	2	MASCOT		T
	R20180100087_1,4083	K.NQTAEKEEFEHQQK.E	1745.81	0.00136	2	1	85.84	0	1.18e-07	0|0	sp|P11142|HSP7C_HUMAN/tr|Q96H53|Q96H53_HUMAN/tr|V9HW22|V9HW22_HUMAN/tr|A8K7Q2|A8K7Q2_HUMAN/tr|Q53GZ6|Q53GZ6_HUMAN/tr|E9PKE3|E9PKE3_HUMAN/tr|Q96BE0|Q96BE0_HUMAN/tr|B3KTV0|B3KTV0_HUMAN/tr|E9PM13|E9PM13_HUMAN/tr|E9PS65|E9PS65_HUMAN/tr|B4E1Q1|B4E1Q1_HUMAN/tr|E9PNE6|E9PNE6_HUMAN/tr|Q9NWW3|Q9NWW3_HUMAN/tr|Q9NZ87|Q9NZ87_HUMAN/tr|Q96IS6|Q96IS6_HUMAN		4.91	1		0	2	MASCOT		T
	R20180100087_1,26652	K.QTQTFTTYSDNQPGVLIQVYEGER.A	2774.33	-0.00034	3	1	61.54	0	5.96e-05	0|0	sp|P11142|HSP7C_HUMAN/tr|V9HW22|V9HW22_HUMAN/tr|A8K7Q2|A8K7Q2_HUMAN/tr|Q53GZ6|Q53GZ6_HUMAN/tr|E9PKE3|E9PKE3_HUMAN/tr|Q96BE0|Q96BE0_HUMAN/tr|B3KTV0|B3KTV0_HUMAN/tr|Q53HF2|Q53HF2_HUMAN/tr|E9PS65|E9PS65_HUMAN/tr|B4E1Q1|B4E1Q1_HUMAN/tr|E9PNE6|E9PNE6_HUMAN/tr|Q96IS6|Q96IS6_HUMAN		4.14	0		0	2	MASCOT		T
	R20180100087_1,32909	K.SENVQDLLLLDVTPLSLGIETAGGVMTVLIK.R	3238.79	-0.00312	3	1	72.26	0	1.93e-06	0|0	sp|P11142|HSP7C_HUMAN/tr|V9HW22|V9HW22_HUMAN/tr|A8K7Q2|A8K7Q2_HUMAN/tr|Q53GZ6|Q53GZ6_HUMAN/tr|E9PKE3|E9PKE3_HUMAN/tr|Q96BE0|Q96BE0_HUMAN/tr|B3KTV0|B3KTV0_HUMAN/tr|B4E1Q1|B4E1Q1_HUMAN/tr|E9PNE6|E9PNE6_HUMAN/tr|Q96IS6|Q96IS6_HUMAN		3.92	0		0	2	MASCOT		T
	R20180100087_1,26423	K.SFYPEEVSSMVLTK.M	1616.79	-0.00042	2	1	61.63	0	4.51e-05	0|0	sp|P11142|HSP7C_HUMAN/tr|V9HW22|V9HW22_HUMAN/tr|Q53GZ6|Q53GZ6_HUMAN/tr|E9PKE3|E9PKE3_HUMAN/tr|E9PN25|E9PN25_HUMAN/tr|E9PQQ4|E9PQQ4_HUMAN/tr|B3KTV0|B3KTV0_HUMAN/tr|E9PPY6|E9PPY6_HUMAN/tr|Q53HF2|Q53HF2_HUMAN/tr|E9PK54|E9PK54_HUMAN/tr|E9PLF4|E9PLF4_HUMAN/tr|E9PN89|E9PN89_HUMAN/tr|E9PI65|E9PI65_HUMAN/tr|E9PQK7|E9PQK7_HUMAN/tr|B4DTX2|B4DTX2_HUMAN/tr|Q96IS6|Q96IS6_HUMAN		4.53	0		0	2	MASCOT		T
	R20180100087_1,26474	K.SFYPEEVSSMVLTK.M	1616.79	-0.00454	3	1	47.71	0	0.00116	0|0	sp|P11142|HSP7C_HUMAN/tr|V9HW22|V9HW22_HUMAN/tr|Q53GZ6|Q53GZ6_HUMAN/tr|E9PKE3|E9PKE3_HUMAN/tr|E9PN25|E9PN25_HUMAN/tr|E9PQQ4|E9PQQ4_HUMAN/tr|B3KTV0|B3KTV0_HUMAN/tr|E9PPY6|E9PPY6_HUMAN/tr|Q53HF2|Q53HF2_HUMAN/tr|E9PK54|E9PK54_HUMAN/tr|E9PLF4|E9PLF4_HUMAN/tr|E9PN89|E9PN89_HUMAN/tr|E9PI65|E9PI65_HUMAN/tr|E9PQK7|E9PQK7_HUMAN/tr|B4DTX2|B4DTX2_HUMAN/tr|Q96IS6|Q96IS6_HUMAN		4.53	0		0	2	MASCOT		T
	R20180100087_1,28902	K.SINPDEAVAYGAAVQAAILSGDK.S	2260.15	0.00109	3	1	83.91	0	3.06e-07	0|0	sp|P11142|HSP7C_HUMAN/tr|V9HW22|V9HW22_HUMAN/tr|A8K7Q2|A8K7Q2_HUMAN/tr|Q53GZ6|Q53GZ6_HUMAN/tr|E9PKE3|E9PKE3_HUMAN/tr|B3KTV0|B3KTV0_HUMAN/tr|Q53HF2|Q53HF2_HUMAN/tr|B4E1Q1|B4E1Q1_HUMAN/tr|E9PNE6|E9PNE6_HUMAN/tr|Q96IS6|Q96IS6_HUMAN		4.03	0		0	2	MASCOT		T
	R20180100087_1,28903	K.SINPDEAVAYGAAVQAAILSGDK.S	2260.15	0.00035	2	1	125.95	0	1.92e-11	0|0	sp|P11142|HSP7C_HUMAN/tr|V9HW22|V9HW22_HUMAN/tr|A8K7Q2|A8K7Q2_HUMAN/tr|Q53GZ6|Q53GZ6_HUMAN/tr|E9PKE3|E9PKE3_HUMAN/tr|B3KTV0|B3KTV0_HUMAN/tr|Q53HF2|Q53HF2_HUMAN/tr|B4E1Q1|B4E1Q1_HUMAN/tr|E9PNE6|E9PNE6_HUMAN/tr|Q96IS6|Q96IS6_HUMAN		4.03	0		0	2	MASCOT		T
	R20180100087_1,15436	K.SQIHDIVLVGGSTR.I	1481.81	-0.00141	3	1	36.84	0	0.0125	0|0	sp|P11142|HSP7C_HUMAN/tr|V9HW22|V9HW22_HUMAN/tr|A8K7Q2|A8K7Q2_HUMAN/tr|Q53GZ6|Q53GZ6_HUMAN/tr|E9PKE3|E9PKE3_HUMAN/tr|B3KTV0|B3KTV0_HUMAN/tr|Q53HF2|Q53HF2_HUMAN/tr|B4E1Q1|B4E1Q1_HUMAN/tr|E9PN89|E9PN89_HUMAN/tr|E9PNE6|E9PNE6_HUMAN/tr|Q96IS6|Q96IS6_HUMAN		6.46	0		0	2	MASCOT		T
	R20180100087_1,15437	K.SQIHDIVLVGGSTR.I	1481.81	-0.00136	2	1	55.54	0	0.000169	0|0	sp|P11142|HSP7C_HUMAN/tr|V9HW22|V9HW22_HUMAN/tr|A8K7Q2|A8K7Q2_HUMAN/tr|Q53GZ6|Q53GZ6_HUMAN/tr|E9PKE3|E9PKE3_HUMAN/tr|B3KTV0|B3KTV0_HUMAN/tr|Q53HF2|Q53HF2_HUMAN/tr|B4E1Q1|B4E1Q1_HUMAN/tr|E9PN89|E9PN89_HUMAN/tr|E9PNE6|E9PNE6_HUMAN/tr|Q96IS6|Q96IS6_HUMAN		6.46	0		0	2	MASCOT		T
	R20180100087_1,10043	K.STAGDTHLGGEDFDNR.M	1691.73	-0.00072	2	1	75.34	0	8.93e-07	0|0	sp|P54652|HSP72_HUMAN/sp|P11142|HSP7C_HUMAN/tr|V9HW22|V9HW22_HUMAN/tr|Q53GZ6|Q53GZ6_HUMAN/tr|E9PKE3|E9PKE3_HUMAN/tr|B3KTV0|B3KTV0_HUMAN/tr|Q53HF2|Q53HF2_HUMAN/tr|E9PN89|E9PN89_HUMAN/tr|A0A024R6B5|A0A024R6B5_HUMAN/tr|Q96IS6|Q96IS6_HUMAN		4.22	0		0	2	MASCOT		T
	R20180100087_1,10528	K.STAGDTHLGGEDFDNR.M	1691.73	-0.00015	3	1	32.54	0	0.00786	0|0	sp|P54652|HSP72_HUMAN/sp|P11142|HSP7C_HUMAN/tr|V9HW22|V9HW22_HUMAN/tr|Q53GZ6|Q53GZ6_HUMAN/tr|E9PKE3|E9PKE3_HUMAN/tr|B3KTV0|B3KTV0_HUMAN/tr|Q53HF2|Q53HF2_HUMAN/tr|E9PN89|E9PN89_HUMAN/tr|A0A024R6B5|A0A024R6B5_HUMAN/tr|Q96IS6|Q96IS6_HUMAN		4.22	0		0	2	MASCOT		T
	R20180100087_1,10782	K.STAGDTHLGGEDFDNR.M	1691.73	-0.00532	2	1	29.89	0	0.037	0|0	sp|P54652|HSP72_HUMAN/sp|P11142|HSP7C_HUMAN/tr|V9HW22|V9HW22_HUMAN/tr|Q53GZ6|Q53GZ6_HUMAN/tr|E9PKE3|E9PKE3_HUMAN/tr|B3KTV0|B3KTV0_HUMAN/tr|Q53HF2|Q53HF2_HUMAN/tr|E9PN89|E9PN89_HUMAN/tr|A0A024R6B5|A0A024R6B5_HUMAN/tr|Q96IS6|Q96IS6_HUMAN		4.22	0		0	2	MASCOT		T
	R20180100087_1,22727	K.TVTNAVVTVPAYFNDSQR.Q	1982	-0.00098	2	1	43.22	0	0.00364	0|0	sp|P11142|HSP7C_HUMAN/tr|V9HW22|V9HW22_HUMAN/tr|Q53GZ6|Q53GZ6_HUMAN/tr|E9PQQ4|E9PQQ4_HUMAN/tr|B3KTV0|B3KTV0_HUMAN/tr|Q53HF2|Q53HF2_HUMAN/tr|E9PK54|E9PK54_HUMAN/tr|E9PLF4|E9PLF4_HUMAN/tr|E9PN89|E9PN89_HUMAN/tr|E9PI65|E9PI65_HUMAN/tr|E9PQK7|E9PQK7_HUMAN/tr|B4DTX2|B4DTX2_HUMAN/tr|Q96IS6|Q96IS6_HUMAN		5.5	0		0	2	MASCOT		T
	R20180100087_1,23354	K.TVTNAVVTVPAYFNDSQR.Q	1982	0.00166	2	1	65.89	0	2.02e-05	0|0	sp|P11142|HSP7C_HUMAN/tr|V9HW22|V9HW22_HUMAN/tr|Q53GZ6|Q53GZ6_HUMAN/tr|E9PQQ4|E9PQQ4_HUMAN/tr|B3KTV0|B3KTV0_HUMAN/tr|Q53HF2|Q53HF2_HUMAN/tr|E9PK54|E9PK54_HUMAN/tr|E9PLF4|E9PLF4_HUMAN/tr|E9PN89|E9PN89_HUMAN/tr|E9PI65|E9PI65_HUMAN/tr|E9PQK7|E9PQK7_HUMAN/tr|B4DTX2|B4DTX2_HUMAN/tr|Q96IS6|Q96IS6_HUMAN		5.5	0		0	2	MASCOT		T
	R20180100087_1,9986	K.VCNPIITK.L	944.523	-0.00049	2	1	31.4	0	0.0811	0|0	sp|P11142|HSP7C_HUMAN/tr|Q96H53|Q96H53_HUMAN/tr|V9HW22|V9HW22_HUMAN/tr|A8K7Q2|A8K7Q2_HUMAN/tr|Q53GZ6|Q53GZ6_HUMAN/tr|E9PKE3|E9PKE3_HUMAN/tr|Q96BE0|Q96BE0_HUMAN/tr|B3KTV0|B3KTV0_HUMAN/tr|E9PS65|E9PS65_HUMAN/tr|B4E1Q1|B4E1Q1_HUMAN/tr|E9PNE6|E9PNE6_HUMAN/tr|Q9NWW3|Q9NWW3_HUMAN/tr|Q9NZ87|Q9NZ87_HUMAN/tr|Q96IS6|Q96IS6_HUMAN		8.19	0		0	2	MASCOT		T
	R20180100087_1,1843	K.YKAEDEK.Q	882.42	0.00018	2	1	38.28	0	0.00756	0|0	sp|P11142|HSP7C_HUMAN/tr|Q96H53|Q96H53_HUMAN/tr|V9HW22|V9HW22_HUMAN/tr|A8K7Q2|A8K7Q2_HUMAN/tr|Q53GZ6|Q53GZ6_HUMAN/tr|E9PKE3|E9PKE3_HUMAN/tr|Q96BE0|Q96BE0_HUMAN/tr|B3KTV0|B3KTV0_HUMAN/tr|E9PM13|E9PM13_HUMAN/tr|E9PS65|E9PS65_HUMAN/tr|B4E1Q1|B4E1Q1_HUMAN/tr|E9PNE6|E9PNE6_HUMAN/tr|Q9NZ87|Q9NZ87_HUMAN/tr|Q96IS6|Q96IS6_HUMAN		4.68	1		0	2	MASCOT		T
	R20180100087_1,23036	R.ARFEELNADLFR.G	1480.75	-0.00447	2	1	46	0	0.00327	0|0	sp|P54652|HSP72_HUMAN/sp|P11142|HSP7C_HUMAN/tr|V9HW22|V9HW22_HUMAN/tr|A8K7Q2|A8K7Q2_HUMAN/tr|Q53GZ6|Q53GZ6_HUMAN/tr|E9PKE3|E9PKE3_HUMAN/tr|B3KTV0|B3KTV0_HUMAN/tr|Q53HF2|Q53HF2_HUMAN/tr|B4E1Q1|B4E1Q1_HUMAN/tr|E9PN89|E9PN89_HUMAN/tr|A0A024R6B5|A0A024R6B5_HUMAN/tr|E9PNE6|E9PNE6_HUMAN/tr|Q96IS6|Q96IS6_HUMAN		4.68	1		0	2	MASCOT		T
	R20180100087_1,23044	R.ARFEELNADLFR.G	1480.75	-0.00158	3	1	47.7	0	0.00423	0|0	sp|P54652|HSP72_HUMAN/sp|P11142|HSP7C_HUMAN/tr|V9HW22|V9HW22_HUMAN/tr|A8K7Q2|A8K7Q2_HUMAN/tr|Q53GZ6|Q53GZ6_HUMAN/tr|E9PKE3|E9PKE3_HUMAN/tr|B3KTV0|B3KTV0_HUMAN/tr|Q53HF2|Q53HF2_HUMAN/tr|B4E1Q1|B4E1Q1_HUMAN/tr|E9PN89|E9PN89_HUMAN/tr|A0A024R6B5|A0A024R6B5_HUMAN/tr|E9PNE6|E9PNE6_HUMAN/tr|Q96IS6|Q96IS6_HUMAN		4.68	1		0	2	MASCOT		T
	R20180100087_1,25500	R.FEELNADLFR.G ! K.FEELNADLFR.G	1253.62	-0.00059	2	1	34.67	0	0.0245	0|0	sp|P54652|HSP72_HUMAN/sp|P11142|HSP7C_HUMAN/tr|V9HW22|V9HW22_HUMAN/tr|A8K7Q2|A8K7Q2_HUMAN/tr|Q53GZ6|Q53GZ6_HUMAN/tr|E9PKE3|E9PKE3_HUMAN/tr|B3KTV0|B3KTV0_HUMAN/tr|Q53HF2|Q53HF2_HUMAN/tr|B4E1Q1|B4E1Q1_HUMAN/tr|E9PN89|E9PN89_HUMAN/tr|A0A024R6B5|A0A024R6B5_HUMAN/tr|E9PNE6|E9PNE6_HUMAN/tr|Q96IS6|Q96IS6_HUMAN ! tr|B3KUS2|B3KUS2_HUMAN		4.14	0		0	2	MASCOT		T
	R20180100087_1,7552	R.GTLDPVEK.A	858.457	-0.00118	2	1	23.14	0	0.33	0|0	sp|P11142|HSP7C_HUMAN/tr|V9HW22|V9HW22_HUMAN/tr|A8K7Q2|A8K7Q2_HUMAN/tr|Q53GZ6|Q53GZ6_HUMAN/tr|E9PKE3|E9PKE3_HUMAN/tr|B3KTV0|B3KTV0_HUMAN/tr|Q53HF2|Q53HF2_HUMAN/tr|B4E1Q1|B4E1Q1_HUMAN/tr|E9PN89|E9PN89_HUMAN/tr|E9PNE6|E9PNE6_HUMAN/tr|Q96IS6|Q96IS6_HUMAN		4.37	0		0	2	MASCOT		T
	R20180100087_1,32519	R.GVPQIEVTFDIDANGILNVSAVDK.S	2514.31	0.0115	2	1	68.54	0	2.88e-05	0|0	sp|P11142|HSP7C_HUMAN/tr|Q96H53|Q96H53_HUMAN/tr|V9HW22|V9HW22_HUMAN/tr|A8K7Q2|A8K7Q2_HUMAN/tr|Q53GZ6|Q53GZ6_HUMAN/tr|E9PKE3|E9PKE3_HUMAN/tr|Q96BE0|Q96BE0_HUMAN/tr|B3KTV0|B3KTV0_HUMAN/tr|E9PM13|E9PM13_HUMAN/tr|E9PS65|E9PS65_HUMAN/tr|B4E1Q1|B4E1Q1_HUMAN/tr|E9PNE6|E9PNE6_HUMAN/tr|Q96IS6|Q96IS6_HUMAN		3.84	0		0	2	MASCOT		T
	R20180100087_1,33447	R.GVPQIEVTFDIDANGILNVSAVDK.S	2514.31	-0.01293	3	1	34.98	0	0.0181	0|0	sp|P11142|HSP7C_HUMAN/tr|Q96H53|Q96H53_HUMAN/tr|V9HW22|V9HW22_HUMAN/tr|A8K7Q2|A8K7Q2_HUMAN/tr|Q53GZ6|Q53GZ6_HUMAN/tr|E9PKE3|E9PKE3_HUMAN/tr|Q96BE0|Q96BE0_HUMAN/tr|B3KTV0|B3KTV0_HUMAN/tr|E9PM13|E9PM13_HUMAN/tr|E9PS65|E9PS65_HUMAN/tr|B4E1Q1|B4E1Q1_HUMAN/tr|E9PNE6|E9PNE6_HUMAN/tr|Q96IS6|Q96IS6_HUMAN		3.84	0		0	2	MASCOT		T
	R20180100087_1,33750	R.GVPQIEVTFDIDANGILNVSAVDK.S	2514.31	-0.0069	2	1	65.53	0	1.66e-05	0|0	sp|P11142|HSP7C_HUMAN/tr|Q96H53|Q96H53_HUMAN/tr|V9HW22|V9HW22_HUMAN/tr|A8K7Q2|A8K7Q2_HUMAN/tr|Q53GZ6|Q53GZ6_HUMAN/tr|E9PKE3|E9PKE3_HUMAN/tr|Q96BE0|Q96BE0_HUMAN/tr|B3KTV0|B3KTV0_HUMAN/tr|E9PM13|E9PM13_HUMAN/tr|E9PS65|E9PS65_HUMAN/tr|B4E1Q1|B4E1Q1_HUMAN/tr|E9PNE6|E9PNE6_HUMAN/tr|Q96IS6|Q96IS6_HUMAN		3.84	0		0	2	MASCOT		T
	R20180100087_1,24625	R.IINEPTAAAIAYGLDK.R ! R.IINEPTAAAIAYGLDK.G ! R.IINEPTAAAIAYGLDK.K ! R.IINEPTAAAIAYGLDK.-	1659.9	-0.00047	2	1	99.77	0	8.11e-09	0|0	sp|P11021|GRP78_HUMAN/tr|V9HWB4|V9HWB4_HUMAN/tr|B4DEF7|B4DEF7_HUMAN ! sp|P34931|HS71L_HUMAN/tr|B4DI54|B4DI54_HUMAN/tr|Q53FA3|Q53FA3_HUMAN/tr|B2RCQ9|B2RCQ9_HUMAN/tr|A0A1U9X7X4|A0A1U9X7X4_HUMAN/tr|A0A1U9X7X9|A0A1U9X7X9_HUMAN/tr|A0A1U9X7W7|A0A1U9X7W7_HUMAN/tr|B4DXY3|B4DXY3_HUMAN ! sp|P54652|HSP72_HUMAN/sp|P11142|HSP7C_HUMAN/tr|V9HW22|V9HW22_HUMAN/tr|E9PKE3|E9PKE3_HUMAN/tr|B3KTV0|B3KTV0_HUMAN/tr|Q53H…		4.37	0		0	2	MASCOT		T
	R20180100087_1,25266	R.IINEPTAAAIAYGLDK.R ! R.IINEPTAAAIAYGLDK.G ! R.IINEPTAAAIAYGLDK.K ! R.IINEPTAAAIAYGLDK.-	1659.9	-0.00415	2	1	82.34	0	1.47e-06	0|0	sp|P11021|GRP78_HUMAN/tr|V9HWB4|V9HWB4_HUMAN/tr|B4DEF7|B4DEF7_HUMAN ! sp|P34931|HS71L_HUMAN/tr|B4DI54|B4DI54_HUMAN/tr|Q53FA3|Q53FA3_HUMAN/tr|B2RCQ9|B2RCQ9_HUMAN/tr|A0A1U9X7X4|A0A1U9X7X4_HUMAN/tr|A0A1U9X7X9|A0A1U9X7X9_HUMAN/tr|A0A1U9X7W7|A0A1U9X7W7_HUMAN/tr|B4DXY3|B4DXY3_HUMAN ! sp|P54652|HSP72_HUMAN/sp|P11142|HSP7C_HUMAN/tr|V9HW22|V9HW22_HUMAN/tr|E9PKE3|E9PKE3_HUMAN/tr|B3KTV0|B3KTV0_HUMAN/tr|Q53H…		4.37	0		0	2	MASCOT		T
	R20180100087_1,8674	R.RFDDAVVQSDM*K.H	1426.66	0.00024	3	1	39.38	0	0.00537	0|0	sp|P11142|HSP7C_HUMAN/tr|V9HW22|V9HW22_HUMAN/tr|Q53GZ6|Q53GZ6_HUMAN/tr|E9PKE3|E9PKE3_HUMAN/tr|E9PN25|E9PN25_HUMAN/tr|E9PQQ4|E9PQQ4_HUMAN/tr|E9PPY6|E9PPY6_HUMAN/tr|Q53HF2|Q53HF2_HUMAN/tr|E9PK54|E9PK54_HUMAN/tr|E9PLF4|E9PLF4_HUMAN/tr|E9PN89|E9PN89_HUMAN/tr|A4D111|A4D111_HUMAN/tr|E9PNE6|E9PNE6_HUMAN/tr|E9PQK7|E9PQK7_HUMAN/tr|B4DTX2|B4DTX2_HUMAN/tr|Q96IS6|Q96IS6_HUMAN		4.43	1	15.994919 Oxidation (M)	0	2	MASCOT		T
	R20180100087_1,11612	R.RFDDAVVQSDMK.H	1410.67	-0.00193	2	1	52.9	0	0.000305	0|0	sp|P11142|HSP7C_HUMAN/tr|V9HW22|V9HW22_HUMAN/tr|Q53GZ6|Q53GZ6_HUMAN/tr|E9PKE3|E9PKE3_HUMAN/tr|E9PN25|E9PN25_HUMAN/tr|E9PQQ4|E9PQQ4_HUMAN/tr|E9PPY6|E9PPY6_HUMAN/tr|Q53HF2|Q53HF2_HUMAN/tr|E9PK54|E9PK54_HUMAN/tr|E9PLF4|E9PLF4_HUMAN/tr|E9PN89|E9PN89_HUMAN/tr|A4D111|A4D111_HUMAN/tr|E9PNE6|E9PNE6_HUMAN/tr|E9PQK7|E9PQK7_HUMAN/tr|B4DTX2|B4DTX2_HUMAN/tr|Q96IS6|Q96IS6_HUMAN		4.43	1		0	2	MASCOT		T
	R20180100087_1,12354	R.RFDDAVVQSDMK.H	1410.67	0.00199	2	1	39.21	0	0.00705	0|0	sp|P11142|HSP7C_HUMAN/tr|V9HW22|V9HW22_HUMAN/tr|Q53GZ6|Q53GZ6_HUMAN/tr|E9PKE3|E9PKE3_HUMAN/tr|E9PN25|E9PN25_HUMAN/tr|E9PQQ4|E9PQQ4_HUMAN/tr|E9PPY6|E9PPY6_HUMAN/tr|Q53HF2|Q53HF2_HUMAN/tr|E9PK54|E9PK54_HUMAN/tr|E9PLF4|E9PLF4_HUMAN/tr|E9PN89|E9PN89_HUMAN/tr|A4D111|A4D111_HUMAN/tr|E9PNE6|E9PNE6_HUMAN/tr|E9PQK7|E9PQK7_HUMAN/tr|B4DTX2|B4DTX2_HUMAN/tr|Q96IS6|Q96IS6_HUMAN		4.43	1		0	2	MASCOT		T
	R20180100087_1,825	R.TACER.A	636.277	5e-05	2	1	24	0	0.121	0|0	sp|P34931|HS71L_HUMAN/sp|P54652|HSP72_HUMAN/sp|P0DMV8|HS71A_HUMAN/sp|P48741|HSP77_HUMAN/sp|P0DMV9|HS71B_HUMAN/sp|P11142|HSP7C_HUMAN/sp|P17066|HSP76_HUMAN/tr|A0A0G2JIW1|A0A0G2JIW1_HUMAN/tr|V9GZ37|V9GZ37_HUMAN/tr|B4DVU9|B4DVU9_HUMAN/tr|B4DNT8|B4DNT8_HUMAN/tr|B4DI54|B4DI54_HUMAN/tr|Q53FA3|Q53FA3_HUMAN/tr|V9HW22|V9HW22_HUMAN/tr|A8K7Q2|A8K7Q2_HUMAN/tr|Q53GZ6|Q53GZ6_HUMAN/tr|E9PKE3|E9PKE3_HUMAN/tr|B4DI…		5.66	0		0	2	MASCOT		T
	R20180100087_1,32168	R.TLSSSTQASIEIDSLYEGIDFYTSITR.A	2997.46	0.00137	3	1	67.58	0	1.14e-05	0|0	sp|P11142|HSP7C_HUMAN/tr|V9HW22|V9HW22_HUMAN/tr|A8K7Q2|A8K7Q2_HUMAN/tr|Q53GZ6|Q53GZ6_HUMAN/tr|E9PKE3|E9PKE3_HUMAN/tr|B3KTV0|B3KTV0_HUMAN/tr|Q53HF2|Q53HF2_HUMAN/tr|B4E1Q1|B4E1Q1_HUMAN/tr|E9PN89|E9PN89_HUMAN/tr|E9PNE6|E9PNE6_HUMAN/tr|Q96IS6|Q96IS6_HUMAN		3.92	0		0	2	MASCOT		T
	R20180100087_1,32278	R.TLSSSTQASIEIDSLYEGIDFYTSITR.A	2997.46	0.0007	2	1	79.49	0	7.3e-07	0|0	sp|P11142|HSP7C_HUMAN/tr|V9HW22|V9HW22_HUMAN/tr|A8K7Q2|A8K7Q2_HUMAN/tr|Q53GZ6|Q53GZ6_HUMAN/tr|E9PKE3|E9PKE3_HUMAN/tr|B3KTV0|B3KTV0_HUMAN/tr|Q53HF2|Q53HF2_HUMAN/tr|B4E1Q1|B4E1Q1_HUMAN/tr|E9PN89|E9PN89_HUMAN/tr|E9PNE6|E9PNE6_HUMAN/tr|Q96IS6|Q96IS6_HUMAN		3.92	0		0	2	MASCOT		T
	R20180100087_1,33889	R.TLSSSTQASIEIDSLYEGIDFYTSITR.A	2997.46	0.00287	3	1	40.62	0	0.0056	0|0	sp|P11142|HSP7C_HUMAN/tr|V9HW22|V9HW22_HUMAN/tr|A8K7Q2|A8K7Q2_HUMAN/tr|Q53GZ6|Q53GZ6_HUMAN/tr|E9PKE3|E9PKE3_HUMAN/tr|B3KTV0|B3KTV0_HUMAN/tr|Q53HF2|Q53HF2_HUMAN/tr|B4E1Q1|B4E1Q1_HUMAN/tr|E9PN89|E9PN89_HUMAN/tr|E9PNE6|E9PNE6_HUMAN/tr|Q96IS6|Q96IS6_HUMAN		3.92	0		0	2	MASCOT		T
	R20180100087_1,34386	R.TLSSSTQASIEIDSLYEGIDFYTSITR.A	2997.46	-0.00769	3	1	52.73	0	0.000351	0|0	sp|P11142|HSP7C_HUMAN/tr|V9HW22|V9HW22_HUMAN/tr|A8K7Q2|A8K7Q2_HUMAN/tr|Q53GZ6|Q53GZ6_HUMAN/tr|E9PKE3|E9PKE3_HUMAN/tr|B3KTV0|B3KTV0_HUMAN/tr|Q53HF2|Q53HF2_HUMAN/tr|B4E1Q1|B4E1Q1_HUMAN/tr|E9PN89|E9PN89_HUMAN/tr|E9PNE6|E9PNE6_HUMAN/tr|Q96IS6|Q96IS6_HUMAN		3.92	0		0	2	MASCOT		T
$20-1	tr|B4DH02|B4DH02_HUMAN cDNA FLJ50510, highly similar to Heat shock 70 kDa protein 4 OS=Homo sapiens PE=2 SV=1	39	27	0.394	94359.9	5.11
$20-2	sp|P34932|HSP74_HUMAN Heat shock 70 kDa protein 4 OS=Homo sapiens GN=HSPA4 PE=1 SV=4	39	27	0.394	94329.9	5.11
	R20180100087_1,2946	K.AESEEM*ETSQAGSK.D	1499.62	0.00109	2	1	87.33	0	1.18e-08	0|0	sp|P34932|HSP74_HUMAN/tr|B4DSE8|B4DSE8_HUMAN/tr|Q59GF8|Q59GF8_HUMAN/tr|B4DT47|B4DT47_HUMAN/tr|B4DH02|B4DH02_HUMAN/tr|A0A087WYC1|A0A087WYC1_HUMAN/tr|B4DUS3|B4DUS3_HUMAN/tr|B4E354|B4E354_HUMAN/tr|B4DIZ3|B4DIZ3_HUMAN/tr|V9HW33|V9HW33_HUMAN/tr|B4E0H6|B4E0H6_HUMAN		4.09	0	15.994919 Oxidation (M)	0	2	MASCOT		T
	R20180100087_1,4466	K.AESEEMETSQAGSK.D	1483.62	-0.00071	2	1	90.5	0	7.71e-09	0|0	sp|P34932|HSP74_HUMAN/tr|B4DSE8|B4DSE8_HUMAN/tr|Q59GF8|Q59GF8_HUMAN/tr|B4DT47|B4DT47_HUMAN/tr|B4DH02|B4DH02_HUMAN/tr|A0A087WYC1|A0A087WYC1_HUMAN/tr|B4DUS3|B4DUS3_HUMAN/tr|B4E354|B4E354_HUMAN/tr|B4DIZ3|B4DIZ3_HUMAN/tr|V9HW33|V9HW33_HUMAN/tr|B4E0H6|B4E0H6_HUMAN		4.09	0		0	2	MASCOT		T
	R20180100087_1,15352	K.ELSTTLNADEAVTR.G	1519.76	-0.0004	2	1	85.12	0	1.41e-06	0|0	sp|P34932|HSP74_HUMAN/tr|Q59GF8|Q59GF8_HUMAN/tr|B4DT47|B4DT47_HUMAN/tr|O14992|O14992_HUMAN/tr|B4DH02|B4DH02_HUMAN/tr|A0A087WYC1|A0A087WYC1_HUMAN/tr|B4DUS3|B4DUS3_HUMAN/tr|A0A087WTS8|A0A087WTS8_HUMAN/tr|B4E354|B4E354_HUMAN/tr|B4DIZ3|B4DIZ3_HUMAN/tr|V9HW33|V9HW33_HUMAN/tr|B4E0H6|B4E0H6_HUMAN		4.14	0		0	2	MASCOT		T
	R20180100087_1,7999	K.ETAESVLK.K	876.467	0.0007	2	1	51.42	0	0.00105	0|0	sp|P34932|HSP74_HUMAN/tr|Q59GF8|Q59GF8_HUMAN/tr|O14992|O14992_HUMAN/tr|B4DH02|B4DH02_HUMAN/tr|A0A087WYC1|A0A087WYC1_HUMAN/tr|B4DUS3|B4DUS3_HUMAN/tr|A0A087WTS8|A0A087WTS8_HUMAN/tr|B4DIZ3|B4DIZ3_HUMAN/tr|V9HW33|V9HW33_HUMAN/tr|Q7KYN0|Q7KYN0_HUMAN		4.53	0		0	2	MASCOT		T
	R20180100087_1,26007	K.FDEVLVNHFCEEFGK.K	1869.85	-0.00042	3	1	51.38	0	0.000218	0|0	sp|P34932|HSP74_HUMAN/tr|Q59GF8|Q59GF8_HUMAN/tr|B4DT47|B4DT47_HUMAN/tr|O14992|O14992_HUMAN/tr|B4DH02|B4DH02_HUMAN/tr|A0A087WYC1|A0A087WYC1_HUMAN/tr|B4DUS3|B4DUS3_HUMAN/tr|A0A087WTS8|A0A087WTS8_HUMAN/tr|B4E354|B4E354_HUMAN/tr|B4DIZ3|B4DIZ3_HUMAN/tr|V9HW33|V9HW33_HUMAN/tr|Q7KYN0|Q7KYN0_HUMAN		4.4	0		0	2	MASCOT		T
	R20180100087_1,26008	K.FDEVLVNHFCEEFGK.K	1869.85	-0.0059	2	1	73.27	0	6.26e-06	0|0	sp|P34932|HSP74_HUMAN/tr|Q59GF8|Q59GF8_HUMAN/tr|B4DT47|B4DT47_HUMAN/tr|O14992|O14992_HUMAN/tr|B4DH02|B4DH02_HUMAN/tr|A0A087WYC1|A0A087WYC1_HUMAN/tr|B4DUS3|B4DUS3_HUMAN/tr|A0A087WTS8|A0A087WTS8_HUMAN/tr|B4E354|B4E354_HUMAN/tr|B4DIZ3|B4DIZ3_HUMAN/tr|V9HW33|V9HW33_HUMAN/tr|Q7KYN0|Q7KYN0_HUMAN		4.4	0		0	2	MASCOT		T
	R20180100087_1,19311	K.FLEM*CNDLLAR.V	1397.66	0.0012	2	1	60.24	0	0.000137	0|0	sp|P34932|HSP74_HUMAN/tr|Q59GF8|Q59GF8_HUMAN/tr|B4DT47|B4DT47_HUMAN/tr|O14992|O14992_HUMAN/tr|B4DH02|B4DH02_HUMAN/tr|A0A087WYC1|A0A087WYC1_HUMAN/tr|B4DUS3|B4DUS3_HUMAN/tr|A0A087WTS8|A0A087WTS8_HUMAN/tr|B4E354|B4E354_HUMAN/tr|B4DIZ3|B4DIZ3_HUMAN/tr|V9HW33|V9HW33_HUMAN/tr|B4E0H6|B4E0H6_HUMAN		4.37	0	15.994919 Oxidation (M)	0	2	MASCOT		T
	R20180100087_1,24801	K.FLEMCNDLLAR.V	1381.66	0.00132	2	1	70.41	0	2.41e-05	0|0	sp|P34932|HSP74_HUMAN/tr|Q59GF8|Q59GF8_HUMAN/tr|B4DT47|B4DT47_HUMAN/tr|O14992|O14992_HUMAN/tr|B4DH02|B4DH02_HUMAN/tr|A0A087WYC1|A0A087WYC1_HUMAN/tr|B4DUS3|B4DUS3_HUMAN/tr|A0A087WTS8|A0A087WTS8_HUMAN/tr|B4E354|B4E354_HUMAN/tr|B4DIZ3|B4DIZ3_HUMAN/tr|V9HW33|V9HW33_HUMAN/tr|B4E0H6|B4E0H6_HUMAN		4.37	0		0	2	MASCOT		T
	R20180100087_1,19351	K.KEDIYAVEIVGGATR.I	1620.86	-0.00018	2	1	69.85	0	8.17e-06	0|0	sp|P34932|HSP74_HUMAN/tr|Q59GF8|Q59GF8_HUMAN/tr|B4DT47|B4DT47_HUMAN/tr|O14992|O14992_HUMAN/tr|B4DH02|B4DH02_HUMAN/tr|A0A087WYC1|A0A087WYC1_HUMAN/tr|B4DUS3|B4DUS3_HUMAN/tr|A0A087WTS8|A0A087WTS8_HUMAN/tr|B4E354|B4E354_HUMAN/tr|B4DIZ3|B4DIZ3_HUMAN/tr|V9HW33|V9HW33_HUMAN/tr|B4E0H6|B4E0H6_HUMAN		4.68	1		0	2	MASCOT		T
	R20180100087_1,19395	K.KEDIYAVEIVGGATR.I	1620.86	0.0021	3	1	40.36	0	0.00752	0|0	sp|P34932|HSP74_HUMAN/tr|Q59GF8|Q59GF8_HUMAN/tr|B4DT47|B4DT47_HUMAN/tr|O14992|O14992_HUMAN/tr|B4DH02|B4DH02_HUMAN/tr|A0A087WYC1|A0A087WYC1_HUMAN/tr|B4DUS3|B4DUS3_HUMAN/tr|A0A087WTS8|A0A087WTS8_HUMAN/tr|B4E354|B4E354_HUMAN/tr|B4DIZ3|B4DIZ3_HUMAN/tr|V9HW33|V9HW33_HUMAN/tr|B4E0H6|B4E0H6_HUMAN		4.68	1		0	2	MASCOT		T
	R20180100087_1,16694	K.KLPEMDID.-	960.471	-0.00082	2	1	23.21	0	0.335	0|0	sp|P34932|HSP74_HUMAN/tr|B0AZT0|B0AZT0_HUMAN/tr|B4DSE8|B4DSE8_HUMAN/tr|B4DT47|B4DT47_HUMAN/tr|B0AZS1|B0AZS1_HUMAN/tr|B4DH02|B4DH02_HUMAN/tr|B4DUS3|B4DUS3_HUMAN/tr|B4E354|B4E354_HUMAN/tr|B4DIZ3|B4DIZ3_HUMAN/tr|V9HW33|V9HW33_HUMAN/tr|B0AZU6|B0AZU6_HUMAN/tr|B4E0H6|B4E0H6_HUMAN/tr|B4DN48|B4DN48_HUMAN		4.27	1		0	2	MASCOT		T
	R20180100087_1,3163	K.KMDQPPQAK.K	1042.53	0.00013	3	1	25.28	0	0.175	0|0	sp|P34932|HSP74_HUMAN/tr|B4DSE8|B4DSE8_HUMAN/tr|Q59GF8|Q59GF8_HUMAN/tr|B4DT47|B4DT47_HUMAN/tr|B4DH02|B4DH02_HUMAN/tr|B4DUS3|B4DUS3_HUMAN/tr|B4E354|B4E354_HUMAN/tr|B4DIZ3|B4DIZ3_HUMAN/tr|V9HW33|V9HW33_HUMAN/tr|B0AZU6|B0AZU6_HUMAN/tr|B4E0H6|B4E0H6_HUMAN		8.59	1		0	2	MASCOT		T
	R20180100087_1,20851	K.LEDTENWLYEDGEDQPK.Q	2080.9	0.00264	2	1	64.49	0	6.15e-06	0|0	sp|P34932|HSP74_HUMAN/tr|B4DSE8|B4DSE8_HUMAN/tr|Q59GF8|Q59GF8_HUMAN/tr|B4DT47|B4DT47_HUMAN/tr|B0AZS1|B0AZS1_HUMAN/tr|B4DH02|B4DH02_HUMAN/tr|A0A087WYC1|A0A087WYC1_HUMAN/tr|B4DUS3|B4DUS3_HUMAN/tr|B4E354|B4E354_HUMAN/tr|B4DIZ3|B4DIZ3_HUMAN/tr|V9HW33|V9HW33_HUMAN/tr|B0AZU6|B0AZU6_HUMAN/tr|B4E0H6|B4E0H6_HUMAN		3.66	0		0	2	MASCOT		T
	R20180100087_1,15297	K.LFEELGK.Q	835.456	0.00093	2	1	37.73	0	0.0128	0|0	sp|P34932|HSP74_HUMAN/tr|Q59GF8|Q59GF8_HUMAN/tr|B4DT47|B4DT47_HUMAN/tr|B0AZS1|B0AZS1_HUMAN/tr|B4DH02|B4DH02_HUMAN/tr|B4DUS3|B4DUS3_HUMAN/tr|B4E354|B4E354_HUMAN/tr|B4DIZ3|B4DIZ3_HUMAN/tr|V9HW33|V9HW33_HUMAN/tr|B0AZU6|B0AZU6_HUMAN/tr|B4E0H6|B4E0H6_HUMAN		4.53	0		0	2	MASCOT		T
	R20180100087_1,10300	K.MQVDQEEPHVEEQQQQTPAENK.A	2622.17	0.00028	3	1	55.1	0	6.71e-05	0|0	sp|P34932|HSP74_HUMAN/tr|B4DSE8|B4DSE8_HUMAN/tr|Q59GF8|Q59GF8_HUMAN/tr|B4DT47|B4DT47_HUMAN/tr|B4DH02|B4DH02_HUMAN/tr|A0A087WYC1|A0A087WYC1_HUMAN/tr|B4DUS3|B4DUS3_HUMAN/tr|B4E354|B4E354_HUMAN/tr|B4DIZ3|B4DIZ3_HUMAN/tr|V9HW33|V9HW33_HUMAN/tr|B4E0H6|B4E0H6_HUMAN		4.14	0		0	2	MASCOT		T
	R20180100087_1,16461	K.NAVEEYVYEM*R.D	1418.63	0.00038	2	1	44.58	0	0.000702	0|0	sp|P34932|HSP74_HUMAN/tr|B4DSE8|B4DSE8_HUMAN/tr|Q59GF8|Q59GF8_HUMAN/tr|B4DT47|B4DT47_HUMAN/tr|B4DH02|B4DH02_HUMAN/tr|A0A087WYC1|A0A087WYC1_HUMAN/tr|B4DUS3|B4DUS3_HUMAN/tr|B4E354|B4E354_HUMAN/tr|B4DIZ3|B4DIZ3_HUMAN/tr|B0AZU6|B0AZU6_HUMAN/tr|B4E0H6|B4E0H6_HUMAN		4.25	0	15.994919 Oxidation (M)	0	2	MASCOT		T
	R20180100087_1,22340	K.NAVEEYVYEMR.D	1402.63	0.00186	2	1	78.61	0	3.87e-07	0|0	sp|P34932|HSP74_HUMAN/tr|B4DSE8|B4DSE8_HUMAN/tr|Q59GF8|Q59GF8_HUMAN/tr|B4DT47|B4DT47_HUMAN/tr|B4DH02|B4DH02_HUMAN/tr|A0A087WYC1|A0A087WYC1_HUMAN/tr|B4DUS3|B4DUS3_HUMAN/tr|B4E354|B4E354_HUMAN/tr|B4DIZ3|B4DIZ3_HUMAN/tr|B0AZU6|B0AZU6_HUMAN/tr|B4E0H6|B4E0H6_HUMAN		4.25	0		0	2	MASCOT		T
	R20180100087_1,22429	K.NAVEEYVYEMR.D	1402.63	-0.00124	3	1	24.07	0	0.402	0|0	sp|P34932|HSP74_HUMAN/tr|B4DSE8|B4DSE8_HUMAN/tr|Q59GF8|Q59GF8_HUMAN/tr|B4DT47|B4DT47_HUMAN/tr|B4DH02|B4DH02_HUMAN/tr|A0A087WYC1|A0A087WYC1_HUMAN/tr|B4DUS3|B4DUS3_HUMAN/tr|B4E354|B4E354_HUMAN/tr|B4DIZ3|B4DIZ3_HUMAN/tr|B0AZU6|B0AZU6_HUMAN/tr|B4E0H6|B4E0H6_HUMAN		4.25	0		0	2	MASCOT		T
	R20180100087_1,7846	K.NKEDQYDHLDAADM*TK.V	1909.82	0.00255	3	1	28.14	0	0.0223	0|0	sp|P34932|HSP74_HUMAN/tr|B0AZT0|B0AZT0_HUMAN/tr|B4DSE8|B4DSE8_HUMAN/tr|Q59GF8|Q59GF8_HUMAN/tr|B4DT47|B4DT47_HUMAN/tr|B0AZS1|B0AZS1_HUMAN/tr|B4DH02|B4DH02_HUMAN/tr|B4DUS3|B4DUS3_HUMAN/tr|B4E354|B4E354_HUMAN/tr|B4DIZ3|B4DIZ3_HUMAN/tr|V9HW33|V9HW33_HUMAN/tr|B0AZU6|B0AZU6_HUMAN/tr|B4E0H6|B4E0H6_HUMAN		4.35	1	15.994919 Oxidation (M)	0	2	MASCOT		T
	R20180100087_1,7862	K.NKEDQYDHLDAADM*TK.V	1909.82	0.0067	2	1	56.3	0	0.000346	0|0	sp|P34932|HSP74_HUMAN/tr|B0AZT0|B0AZT0_HUMAN/tr|B4DSE8|B4DSE8_HUMAN/tr|Q59GF8|Q59GF8_HUMAN/tr|B4DT47|B4DT47_HUMAN/tr|B0AZS1|B0AZS1_HUMAN/tr|B4DH02|B4DH02_HUMAN/tr|B4DUS3|B4DUS3_HUMAN/tr|B4E354|B4E354_HUMAN/tr|B4DIZ3|B4DIZ3_HUMAN/tr|V9HW33|V9HW33_HUMAN/tr|B0AZU6|B0AZU6_HUMAN/tr|B4E0H6|B4E0H6_HUMAN		4.35	1	15.994919 Oxidation (M)	0	2	MASCOT		T
	R20180100087_1,11524	K.NKEDQYDHLDAADMTK.V	1893.83	3e-05	3	1	31.31	0	0.018	0|0	sp|P34932|HSP74_HUMAN/tr|B0AZT0|B0AZT0_HUMAN/tr|B4DSE8|B4DSE8_HUMAN/tr|Q59GF8|Q59GF8_HUMAN/tr|B4DT47|B4DT47_HUMAN/tr|B0AZS1|B0AZS1_HUMAN/tr|B4DH02|B4DH02_HUMAN/tr|B4DUS3|B4DUS3_HUMAN/tr|B4E354|B4E354_HUMAN/tr|B4DIZ3|B4DIZ3_HUMAN/tr|V9HW33|V9HW33_HUMAN/tr|B0AZU6|B0AZU6_HUMAN/tr|B4E0H6|B4E0H6_HUMAN		4.35	1		0	2	MASCOT		T
	R20180100087_1,11535	K.NKEDQYDHLDAADMTK.V	1893.83	-0.00042	2	1	116.6	0	1.15e-10	0|0	sp|P34932|HSP74_HUMAN/tr|B0AZT0|B0AZT0_HUMAN/tr|B4DSE8|B4DSE8_HUMAN/tr|Q59GF8|Q59GF8_HUMAN/tr|B4DT47|B4DT47_HUMAN/tr|B0AZS1|B0AZS1_HUMAN/tr|B4DH02|B4DH02_HUMAN/tr|B4DUS3|B4DUS3_HUMAN/tr|B4E354|B4E354_HUMAN/tr|B4DIZ3|B4DIZ3_HUMAN/tr|V9HW33|V9HW33_HUMAN/tr|B0AZU6|B0AZU6_HUMAN/tr|B4E0H6|B4E0H6_HUMAN		4.35	1		0	2	MASCOT		T
	R20180100087_1,11499	K.QDLPALEEKPR.N	1295.7	-0.00077	2	1	66.45	0	7.79e-05	0|0	sp|P34932|HSP74_HUMAN/tr|Q59GF8|Q59GF8_HUMAN/tr|B4DT47|B4DT47_HUMAN/tr|O14992|O14992_HUMAN/tr|B4DH02|B4DH02_HUMAN/tr|A0A087WYC1|A0A087WYC1_HUMAN/tr|B4DUS3|B4DUS3_HUMAN/tr|A0A087WTS8|A0A087WTS8_HUMAN/tr|B4DIZ3|B4DIZ3_HUMAN/tr|V9HW33|V9HW33_HUMAN/tr|Q7KYN0|Q7KYN0_HUMAN		4.68	0		0	2	MASCOT		T
	R20180100087_1,11661	K.QDLPALEEKPR.N	1295.7	0.00033	3	1	44.5	0	0.00244	0|0	sp|P34932|HSP74_HUMAN/tr|Q59GF8|Q59GF8_HUMAN/tr|B4DT47|B4DT47_HUMAN/tr|O14992|O14992_HUMAN/tr|B4DH02|B4DH02_HUMAN/tr|A0A087WYC1|A0A087WYC1_HUMAN/tr|B4DUS3|B4DUS3_HUMAN/tr|A0A087WTS8|A0A087WTS8_HUMAN/tr|B4DIZ3|B4DIZ3_HUMAN/tr|V9HW33|V9HW33_HUMAN/tr|Q7KYN0|Q7KYN0_HUMAN		4.68	0		0	2	MASCOT		T
	R20180100087_1,4077	K.SEENEEPM*ETDQNAK.E	1766.7	0.00176	2	1	59.79	0	1.39e-05	0|0	sp|P34932|HSP74_HUMAN/tr|Q59GF8|Q59GF8_HUMAN/tr|B4DT47|B4DT47_HUMAN/tr|B4DH02|B4DH02_HUMAN/tr|A0A087WYC1|A0A087WYC1_HUMAN/tr|B4DUS3|B4DUS3_HUMAN/tr|B4E354|B4E354_HUMAN/tr|B4DIZ3|B4DIZ3_HUMAN/tr|V9HW33|V9HW33_HUMAN/tr|B4E0H6|B4E0H6_HUMAN		3.83	0	15.994919 Oxidation (M)	0	2	MASCOT		T
	R20180100087_1,6408	K.SEENEEPMETDQNAKEEEK.M	2265.93	-0.00157	3	1	48.14	0	0.000203	0|0	sp|P34932|HSP74_HUMAN/tr|Q59GF8|Q59GF8_HUMAN/tr|B4DT47|B4DT47_HUMAN/tr|B4DH02|B4DH02_HUMAN/tr|A0A087WYC1|A0A087WYC1_HUMAN/tr|B4DUS3|B4DUS3_HUMAN/tr|B4E354|B4E354_HUMAN/tr|B4DIZ3|B4DIZ3_HUMAN/tr|V9HW33|V9HW33_HUMAN/tr|B4E0H6|B4E0H6_HUMAN		3.93	1		0	2	MASCOT		T
	R20180100087_1,17673	K.STNEAMEWMNNK.L	1454.6	0.00231	2	1	53.9	0	3.71e-05	0|0	sp|P34932|HSP74_HUMAN/tr|B0AZT0|B0AZT0_HUMAN/tr|B4DSE8|B4DSE8_HUMAN/tr|Q59GF8|Q59GF8_HUMAN/tr|B4DT47|B4DT47_HUMAN/tr|B0AZS1|B0AZS1_HUMAN/tr|B4DH02|B4DH02_HUMAN/tr|B4DUS3|B4DUS3_HUMAN/tr|B4E354|B4E354_HUMAN/tr|B4DIZ3|B4DIZ3_HUMAN/tr|V9HW33|V9HW33_HUMAN/tr|B0AZU6|B0AZU6_HUMAN/tr|B4E0H6|B4E0H6_HUMAN/tr|B4DN48|B4DN48_HUMAN		4.53	0		0	2	MASCOT		T
	R20180100087_1,29042	K.TSTVDLPIENQLLWQIDR.E	2141.12	0.00238	2	1	114.76	0	2.38e-10	0|0	sp|P34932|HSP74_HUMAN/tr|B4DSE8|B4DSE8_HUMAN/tr|Q59GF8|Q59GF8_HUMAN/tr|B4DT47|B4DT47_HUMAN/tr|B4DH02|B4DH02_HUMAN/tr|B4DUS3|B4DUS3_HUMAN/tr|B4E354|B4E354_HUMAN/tr|B4DIZ3|B4DIZ3_HUMAN/tr|V9HW33|V9HW33_HUMAN/tr|B0AZU6|B0AZU6_HUMAN/tr|B4E0H6|B4E0H6_HUMAN		4.03	0		0	2	MASCOT		T
	R20180100087_1,29073	K.TSTVDLPIENQLLWQIDR.E	2141.12	-0.00319	3	1	21.29	0	0.512	0|0	sp|P34932|HSP74_HUMAN/tr|B4DSE8|B4DSE8_HUMAN/tr|Q59GF8|Q59GF8_HUMAN/tr|B4DT47|B4DT47_HUMAN/tr|B4DH02|B4DH02_HUMAN/tr|B4DUS3|B4DUS3_HUMAN/tr|B4E354|B4E354_HUMAN/tr|B4DIZ3|B4DIZ3_HUMAN/tr|V9HW33|V9HW33_HUMAN/tr|B0AZU6|B0AZU6_HUMAN/tr|B4E0H6|B4E0H6_HUMAN		4.03	0		0	2	MASCOT		T
	R20180100087_1,8065	K.VTYMEEER.N	1056.47	-3e-05	2	1	51.13	0	0.000215	0|0	sp|P34932|HSP74_HUMAN/tr|Q59GF8|Q59GF8_HUMAN/tr|O14992|O14992_HUMAN/tr|B4DH02|B4DH02_HUMAN/tr|A0A087WYC1|A0A087WYC1_HUMAN/tr|A0A087WTS8|A0A087WTS8_HUMAN/tr|V9HW33|V9HW33_HUMAN/tr|Q7KYN0|Q7KYN0_HUMAN		4.25	0		0	2	MASCOT		T
	R20180100087_1,18086	R.AGGIETIANEYSDR.C	1495.7	-0.00623	2	1	43.85	0	0.00707	0|0	sp|P34932|HSP74_HUMAN/tr|Q59GF8|Q59GF8_HUMAN/tr|O14992|O14992_HUMAN/tr|B4DH02|B4DH02_HUMAN/tr|A0A087WYC1|A0A087WYC1_HUMAN/tr|A0A087WTS8|A0A087WTS8_HUMAN/tr|V9HW33|V9HW33_HUMAN		4.14	0		0	2	MASCOT		T
	R20180100087_1,4768	R.DKLSGEYEK.F ! R.DKLSGEYEK.I	1068.52	-0.00013	2	1	31.61	0	0.0349	0|0	sp|P34932|HSP74_HUMAN/tr|B4DSE8|B4DSE8_HUMAN/tr|Q59GF8|Q59GF8_HUMAN/tr|B4DT47|B4DT47_HUMAN/tr|B0AZS1|B0AZS1_HUMAN/tr|B4DH02|B4DH02_HUMAN/tr|A0A087WYC1|A0A087WYC1_HUMAN/tr|B4DUS3|B4DUS3_HUMAN/tr|B4E354|B4E354_HUMAN/tr|V9HW33|V9HW33_HUMAN/tr|B0AZU6|B0AZU6_HUMAN/tr|B4E0H6|B4E0H6_HUMAN ! tr|B4DIZ3|B4DIZ3_HUMAN		4.68	1		0	2	MASCOT		T
	R20180100087_1,29181	R.EFSITDVVPYPISLR.W	1735.93	0.00217	2	1	56.99	0	0.000149	0|0	sp|P34932|HSP74_HUMAN/tr|Q59GF8|Q59GF8_HUMAN/tr|B4DT47|B4DT47_HUMAN/tr|O14992|O14992_HUMAN/tr|B4DH02|B4DH02_HUMAN/tr|A0A087WYC1|A0A087WYC1_HUMAN/tr|B4DUS3|B4DUS3_HUMAN/tr|A0A087WTS8|A0A087WTS8_HUMAN/tr|B4E354|B4E354_HUMAN/tr|B4DIZ3|B4DIZ3_HUMAN/tr|V9HW33|V9HW33_HUMAN/tr|B4E0H6|B4E0H6_HUMAN		4.37	0		0	2	MASCOT		T
	R20180100087_1,22235	R.EMLNLYIENEGK.M	1452.7	0.00011	2	1	50.05	0	0.00061	0|0	sp|P34932|HSP74_HUMAN/tr|B4DSE8|B4DSE8_HUMAN/tr|Q59GF8|Q59GF8_HUMAN/tr|B4DT47|B4DT47_HUMAN/tr|B4DH02|B4DH02_HUMAN/tr|A0A087WYC1|A0A087WYC1_HUMAN/tr|B4DUS3|B4DUS3_HUMAN/tr|B4E354|B4E354_HUMAN/tr|B4DIZ3|B4DIZ3_HUMAN/tr|V9HW33|V9HW33_HUMAN/tr|B0AZU6|B0AZU6_HUMAN/tr|B4E0H6|B4E0H6_HUMAN		4.25	0		0	2	MASCOT		T
	R20180100087_1,3919	R.FQESEERPK.L	1149.55	-0.00074	2	1	46.73	0	0.00167	0|0	sp|P34932|HSP74_HUMAN/tr|Q59GF8|Q59GF8_HUMAN/tr|B4DT47|B4DT47_HUMAN/tr|B0AZS1|B0AZS1_HUMAN/tr|B4DH02|B4DH02_HUMAN/tr|B4DUS3|B4DUS3_HUMAN/tr|B4E354|B4E354_HUMAN/tr|B4DIZ3|B4DIZ3_HUMAN/tr|V9HW33|V9HW33_HUMAN/tr|B0AZU6|B0AZU6_HUMAN/tr|B4E0H6|B4E0H6_HUMAN		4.79	0		0	2	MASCOT		T
	R20180100087_1,3922	R.FQESEERPK.L	1149.55	-0.00063	3	1	40.83	0	0.00651	0|0	sp|P34932|HSP74_HUMAN/tr|Q59GF8|Q59GF8_HUMAN/tr|B4DT47|B4DT47_HUMAN/tr|B0AZS1|B0AZS1_HUMAN/tr|B4DH02|B4DH02_HUMAN/tr|B4DUS3|B4DUS3_HUMAN/tr|B4E354|B4E354_HUMAN/tr|B4DIZ3|B4DIZ3_HUMAN/tr|V9HW33|V9HW33_HUMAN/tr|B0AZU6|B0AZU6_HUMAN/tr|B4E0H6|B4E0H6_HUMAN		4.79	0		0	2	MASCOT		T
	R20180100087_1,24055	R.KFDEVLVNHFCEEFGK.K	1997.94	-0.00028	3	1	28.18	0	0.0855	0|0	sp|P34932|HSP74_HUMAN/tr|Q59GF8|Q59GF8_HUMAN/tr|B4DT47|B4DT47_HUMAN/tr|O14992|O14992_HUMAN/tr|B4DH02|B4DH02_HUMAN/tr|A0A087WYC1|A0A087WYC1_HUMAN/tr|B4DUS3|B4DUS3_HUMAN/tr|A0A087WTS8|A0A087WTS8_HUMAN/tr|B4E354|B4E354_HUMAN/tr|B4DIZ3|B4DIZ3_HUMAN/tr|V9HW33|V9HW33_HUMAN/tr|Q7KYN0|Q7KYN0_HUMAN		4.83	1		0	2	MASCOT		T
	R20180100087_1,23095	R.VNVHGIFSVSSASLVEVHK.S	2009.08	-0.0036	3	1	53.53	0	0.000276	0|0	sp|P34932|HSP74_HUMAN/tr|Q59GF8|Q59GF8_HUMAN/tr|B4DT47|B4DT47_HUMAN/tr|B4DH02|B4DH02_HUMAN/tr|A0A087WYC1|A0A087WYC1_HUMAN/tr|B4DUS3|B4DUS3_HUMAN/tr|B4E354|B4E354_HUMAN/tr|B4DIZ3|B4DIZ3_HUMAN/tr|V9HW33|V9HW33_HUMAN/tr|B4E0H6|B4E0H6_HUMAN		6.89	0		0	2	MASCOT		T
	R20180100087_1,16396	R.WNSPAEEGSSDCEVFSK.N	1928.8	-0.00403	2	1	97.88	0	2.82e-09	0|0	sp|P34932|HSP74_HUMAN/tr|Q59GF8|Q59GF8_HUMAN/tr|B4DT47|B4DT47_HUMAN/tr|O14992|O14992_HUMAN/tr|B4DH02|B4DH02_HUMAN/tr|A0A087WYC1|A0A087WYC1_HUMAN/tr|B4DUS3|B4DUS3_HUMAN/tr|A0A087WTS8|A0A087WTS8_HUMAN/tr|B4E354|B4E354_HUMAN/tr|B4DIZ3|B4DIZ3_HUMAN/tr|V9HW33|V9HW33_HUMAN/tr|B4E0H6|B4E0H6_HUMAN		4	0		0	2	MASCOT		T
$21-1	tr|E7EX73|E7EX73_HUMAN Eukaryotic translation initiation factor 4 gamma 1 OS=Homo sapiens GN=EIF4G1 PE=1 SV=1	29	27	0.2221	158643	5.14
$21-2	tr|B2RU06|B2RU06_HUMAN eIF4G1 protein OS=Homo sapiens GN=EIF4G1 PE=2 SV=1	29	27	0.1986	176173	5.27
$21-3	sp|Q04637|IF4G1_HUMAN Eukaryotic translation initiation factor 4 gamma 1 OS=Homo sapiens GN=EIF4G1 PE=1 SV=4	29	27	0.1995	175489	5.25
$21-4	tr|Q4LE58|Q4LE58_HUMAN eIF4G1 variant protein (Fragment) OS=Homo sapiens GN=EIF4G1 variant protein PE=2 SV=1	29	27	0.1964	178153	5.24
$21-5	tr|E9PGM1|E9PGM1_HUMAN Eukaryotic translation initiation factor 4 gamma 1 OS=Homo sapiens GN=EIF4G1 PE=1 SV=1	29	27	0.2108	166745	5.15
$21-6	tr|B2RU10|B2RU10_HUMAN eIF4G1 protein OS=Homo sapiens GN=EIF4G1 PE=2 SV=1	29	27	0.1986	176205	5.27
$21-7	tr|E7EUU4|E7EUU4_HUMAN Eukaryotic translation initiation factor 4 gamma 1 OS=Homo sapiens GN=EIF4G1 PE=1 SV=1	29	27	0.2045	171640	5.23
$21-8	tr|B4DGF1|B4DGF1_HUMAN cDNA FLJ56479, highly similar to Eukaryotic translation initiation factor 4 gamma 1 OS=Homo sapiens PE=2 SV=1	29	27	0.2037	172157	5.25
	R20180100087_1,8892	K.AALSEEELEKK.S	1246.65	-0.00126	2	1	32.41	0	0.0553	0|0	sp|Q04637|IF4G1_HUMAN/tr|B2RU06|B2RU06_HUMAN/tr|E7EX73|E7EX73_HUMAN/tr|E7EUU4|E7EUU4_HUMAN/tr|B4DSI9|B4DSI9_HUMAN/tr|B4DGF1|B4DGF1_HUMAN/tr|Q96I65|Q96I65_HUMAN/tr|E9PGM1|E9PGM1_HUMAN/tr|B2RU10|B2RU10_HUMAN/tr|Q4LE58|Q4LE58_HUMAN		4.49	1		0	2	MASCOT		T
	R20180100087_1,25650	K.AIIEEYLHLNDMK.E	1588.8	0.00304	2	1	59.65	0	0.00022	0|0	sp|Q04637|IF4G1_HUMAN/tr|B2RU06|B2RU06_HUMAN/tr|E7EX73|E7EX73_HUMAN/tr|E7EUU4|E7EUU4_HUMAN/tr|B4DSI9|B4DSI9_HUMAN/tr|B4DGF1|B4DGF1_HUMAN/tr|Q96I65|Q96I65_HUMAN/tr|E9PGM1|E9PGM1_HUMAN/tr|B2RU10|B2RU10_HUMAN/tr|Q4LE58|Q4LE58_HUMAN		4.65	0		0	2	MASCOT		T
	R20180100087_1,27817	K.EAVGDLLDAFK.E	1177.61	-0.00016	2	1	62.77	0	5.23e-05	0|0	sp|Q04637|IF4G1_HUMAN/tr|B2RU06|B2RU06_HUMAN/tr|E7EX73|E7EX73_HUMAN/tr|E7EUU4|E7EUU4_HUMAN/tr|B4DSI9|B4DSI9_HUMAN/tr|C9K073|C9K073_HUMAN/tr|C9J6B6|C9J6B6_HUMAN/tr|B4DGF1|B4DGF1_HUMAN/tr|C9J2Z7|C9J2Z7_HUMAN/tr|E9PGM1|E9PGM1_HUMAN/tr|B2RU10|B2RU10_HUMAN/tr|Q4LE58|Q4LE58_HUMAN/tr|C9JF13|C9JF13_HUMAN		4.03	0		0	2	MASCOT		T
	R20180100087_1,31474	K.EAVQCVQELASPSLLFIFVR.H	2306.22	-0.00555	2	1	113.29	0	3.15e-10	0|0	sp|Q04637|IF4G1_HUMAN/tr|B2RU06|B2RU06_HUMAN/tr|E7EX73|E7EX73_HUMAN/tr|E7EUU4|E7EUU4_HUMAN/tr|B4DSI9|B4DSI9_HUMAN/tr|B4DGF1|B4DGF1_HUMAN/tr|Q96I65|Q96I65_HUMAN/tr|E9PGM1|E9PGM1_HUMAN/tr|B2RU10|B2RU10_HUMAN/tr|Q4LE58|Q4LE58_HUMAN		4.53	0		0	2	MASCOT		T
	R20180100087_1,26653	K.EFLPEGQDIGAFVAEQK.V	1877.93	-0.00204	2	1	58.44	0	0.000101	0|0	sp|Q04637|IF4G1_HUMAN/tr|B2RU06|B2RU06_HUMAN/tr|E7EX73|E7EX73_HUMAN/tr|H7C0V6|H7C0V6_HUMAN/tr|E7EUU4|E7EUU4_HUMAN/tr|B4DSI9|B4DSI9_HUMAN/tr|B4DGF1|B4DGF1_HUMAN/tr|Q96I65|Q96I65_HUMAN/tr|E9PGM1|E9PGM1_HUMAN/tr|B2RU10|B2RU10_HUMAN/tr|Q4LE58|Q4LE58_HUMAN		4	0		0	2	MASCOT		T
	R20180100087_1,6363	K.EMDEAATAEER.G	1251.52	-0.00052	2	1	30.26	0	0.00928	0|0	sp|Q04637|IF4G1_HUMAN/tr|B2RU06|B2RU06_HUMAN/tr|E7EX73|E7EX73_HUMAN/tr|E7EUU4|E7EUU4_HUMAN/tr|B4DSI9|B4DSI9_HUMAN/tr|C9J6B6|C9J6B6_HUMAN/tr|B4DGF1|B4DGF1_HUMAN/tr|E9PGM1|E9PGM1_HUMAN/tr|B2RU10|B2RU10_HUMAN/tr|Q4LE58|Q4LE58_HUMAN/tr|C9JF13|C9JF13_HUMAN		3.91	0		0	2	MASCOT		T
	R20180100087_1,22636	K.FIGELFK.L	853.482	-0.00124	2	1	34.76	0	0.0129	0|0	sp|O43432|IF4G3_HUMAN/sp|Q04637|IF4G1_HUMAN/tr|B2RU06|B2RU06_HUMAN/tr|E7EX73|E7EX73_HUMAN/tr|E7EUU4|E7EUU4_HUMAN/tr|Q59GJ0|Q59GJ0_HUMAN/tr|B4DSI9|B4DSI9_HUMAN/tr|A0A0A0MSA7|A0A0A0MSA7_HUMAN/tr|C9J6B6|C9J6B6_HUMAN/tr|B4DGF1|B4DGF1_HUMAN/tr|A0A0U1RQK7|A0A0U1RQK7_HUMAN/tr|B4DH17|B4DH17_HUMAN/tr|B4DZE1|B4DZE1_HUMAN/tr|E9PGM1|E9PGM1_HUMAN/tr|B2RU10|B2RU10_HUMAN/tr|Q4LE58|Q4LE58_HUMAN/tr|C9JF13|C9JF13_…		6	0		0	2	MASCOT		T
	R20180100087_1,27842	K.GVIDLIFEK.A	1033.59	-0.00039	2	1	35.02	0	0.0165	0|0	sp|Q04637|IF4G1_HUMAN/tr|B2RU06|B2RU06_HUMAN/tr|E7EX73|E7EX73_HUMAN/tr|E7EUU4|E7EUU4_HUMAN/tr|B4DSI9|B4DSI9_HUMAN/tr|C9K073|C9K073_HUMAN/tr|C9J6B6|C9J6B6_HUMAN/tr|B4DGF1|B4DGF1_HUMAN/tr|C9J2Z7|C9J2Z7_HUMAN/tr|E9PGM1|E9PGM1_HUMAN/tr|B2RU10|B2RU10_HUMAN/tr|Q4LE58|Q4LE58_HUMAN/tr|C9JF13|C9JF13_HUMAN		4.37	0		0	2	MASCOT		T
	R20180100087_1,25234	K.IIATVLMTEDIK.L	1346.76	-0.00258	2	1	34.14	0	0.0246	0|0	sp|Q04637|IF4G1_HUMAN/tr|B2RU06|B2RU06_HUMAN/tr|E7EX73|E7EX73_HUMAN/tr|E7EUU4|E7EUU4_HUMAN/tr|B4DSI9|B4DSI9_HUMAN/tr|C9K073|C9K073_HUMAN/tr|C9J6B6|C9J6B6_HUMAN/tr|B4DGF1|B4DGF1_HUMAN/tr|C9J2Z7|C9J2Z7_HUMAN/tr|E9PGM1|E9PGM1_HUMAN/tr|B2RU10|B2RU10_HUMAN/tr|Q4LE58|Q4LE58_HUMAN/tr|C9JF13|C9JF13_HUMAN		4.37	0		0	2	MASCOT		T
	R20180100087_1,15931	K.ITKPGSIDSNNQLFAPGGR.L	1972.02	0.00713	2	1	75.01	0	6.49e-06	0|0	sp|Q04637|IF4G1_HUMAN/tr|B2RU06|B2RU06_HUMAN/tr|E7EX73|E7EX73_HUMAN/tr|E7EUU4|E7EUU4_HUMAN/tr|B4DSI9|B4DSI9_HUMAN/tr|B4DGF1|B4DGF1_HUMAN/tr|Q96I65|Q96I65_HUMAN/tr|E9PGM1|E9PGM1_HUMAN/tr|B2RU10|B2RU10_HUMAN/tr|Q4LE58|Q4LE58_HUMAN		8.75	0		0	2	MASCOT		T
	R20180100087_1,26570	K.LTPQMFQQLMK.Q	1364.71	-0.00605	2	1	37.32	0	0.0258	0|0	sp|Q04637|IF4G1_HUMAN/tr|B2RU06|B2RU06_HUMAN/tr|E7EX73|E7EX73_HUMAN/tr|E7EUU4|E7EUU4_HUMAN/tr|B4DSI9|B4DSI9_HUMAN/tr|C9K073|C9K073_HUMAN/tr|C9J6B6|C9J6B6_HUMAN/tr|B4DGF1|B4DGF1_HUMAN/tr|C9J2Z7|C9J2Z7_HUMAN/tr|E9PGM1|E9PGM1_HUMAN/tr|B2RU10|B2RU10_HUMAN/tr|Q4LE58|Q4LE58_HUMAN/tr|C9JF13|C9JF13_HUMAN		8.75	0		0	2	MASCOT		T
	R20180100087_1,18689	K.MLTEAIMHDCVVK.L	1546.74	0.00026	3	1	32.14	0	0.0924	0|0	sp|O43432|IF4G3_HUMAN/sp|Q04637|IF4G1_HUMAN/tr|B2RU06|B2RU06_HUMAN/tr|E7EX73|E7EX73_HUMAN/tr|E7EUU4|E7EUU4_HUMAN/tr|Q59GJ0|Q59GJ0_HUMAN/tr|B4DSI9|B4DSI9_HUMAN/tr|A0A0A0MSA7|A0A0A0MSA7_HUMAN/tr|B4DGF1|B4DGF1_HUMAN/tr|A0A0U1RQK7|A0A0U1RQK7_HUMAN/tr|B4DH17|B4DH17_HUMAN/tr|B4DZE1|B4DZE1_HUMAN/tr|E9PGM1|E9PGM1_HUMAN/tr|B2RU10|B2RU10_HUMAN/tr|Q4LE58|Q4LE58_HUMAN/tr|C9JF13|C9JF13_HUMAN		5.3	0		0	2	MASCOT		T
	R20180100087_1,12077	K.NHDEESLECLCR.L	1561.64	-0.00738	2	1	39.79	0	0.00469	0|0	sp|O43432|IF4G3_HUMAN/sp|Q04637|IF4G1_HUMAN/tr|B2RU06|B2RU06_HUMAN/tr|E7EX73|E7EX73_HUMAN/tr|E7EUU4|E7EUU4_HUMAN/tr|Q59GJ0|Q59GJ0_HUMAN/tr|B4DSI9|B4DSI9_HUMAN/tr|A0A0A0MSA7|A0A0A0MSA7_HUMAN/tr|B4DGF1|B4DGF1_HUMAN/tr|A0A0U1RQK7|A0A0U1RQK7_HUMAN/tr|B4DH17|B4DH17_HUMAN/tr|B4DZE1|B4DZE1_HUMAN/tr|E9PGM1|E9PGM1_HUMAN/tr|B2RU10|B2RU10_HUMAN/tr|Q4LE58|Q4LE58_HUMAN/tr|C9JF13|C9JF13_HUMAN		4.4	0		0	2	MASCOT		T
	R20180100087_1,14323	K.QVTQLAIDTEER.L	1402.72	0.00055	2	1	63.89	0	3.72e-05	0|0	sp|Q04637|IF4G1_HUMAN/tr|B2RU06|B2RU06_HUMAN/tr|E7EX73|E7EX73_HUMAN/tr|E7EUU4|E7EUU4_HUMAN/tr|B4DSI9|B4DSI9_HUMAN/tr|C9K073|C9K073_HUMAN/tr|C9J6B6|C9J6B6_HUMAN/tr|B4DGF1|B4DGF1_HUMAN/tr|C9J2Z7|C9J2Z7_HUMAN/tr|E9PGM1|E9PGM1_HUMAN/tr|B2RU10|B2RU10_HUMAN/tr|Q4LE58|Q4LE58_HUMAN/tr|C9JF13|C9JF13_HUMAN		4.14	0		0	2	MASCOT		T
	R20180100087_1,17011	K.SDQWKPLNLEEK.K	1486.75	-0.00088	2	1	38.75	0	0.0297	0|0	sp|Q04637|IF4G1_HUMAN/tr|B2RU06|B2RU06_HUMAN/tr|E7EX73|E7EX73_HUMAN/tr|E7EUU4|E7EUU4_HUMAN/tr|B4DSI9|B4DSI9_HUMAN/tr|C9K073|C9K073_HUMAN/tr|C9J6B6|C9J6B6_HUMAN/tr|B4DGF1|B4DGF1_HUMAN/tr|C9J2Z7|C9J2Z7_HUMAN/tr|E9PGM1|E9PGM1_HUMAN/tr|B2RU10|B2RU10_HUMAN/tr|Q4LE58|Q4LE58_HUMAN/tr|C9JF13|C9JF13_HUMAN		4.68	0		0	2	MASCOT		T
	R20180100087_1,3896	K.TIDQIHK.E	854.473	-0.00071	2	1	34.67	0	0.0152	0|0	sp|Q04637|IF4G1_HUMAN/tr|B2RU06|B2RU06_HUMAN/tr|E7EX73|E7EX73_HUMAN/tr|H7C044|H7C044_HUMAN/tr|E7EUU4|E7EUU4_HUMAN/tr|B4DSI9|B4DSI9_HUMAN/tr|B4DGF1|B4DGF1_HUMAN/tr|Q96I65|Q96I65_HUMAN/tr|E9PGM1|E9PGM1_HUMAN/tr|B2RU10|B2RU10_HUMAN/tr|Q4LE58|Q4LE58_HUMAN		6.41	0		0	2	MASCOT		T
	R20180100087_1,10649	K.TQDLFR.R	779.405	-0.00039	2	1	29.06	0	0.202	0|0	sp|Q04637|IF4G1_HUMAN/tr|B2RU06|B2RU06_HUMAN/tr|E7EX73|E7EX73_HUMAN/tr|E7EUU4|E7EUU4_HUMAN/tr|B4DSI9|B4DSI9_HUMAN/tr|C9K073|C9K073_HUMAN/tr|C9J6B6|C9J6B6_HUMAN/tr|B4DGF1|B4DGF1_HUMAN/tr|C9J2Z7|C9J2Z7_HUMAN/tr|E9PGM1|E9PGM1_HUMAN/tr|B2RU10|B2RU10_HUMAN/tr|Q4LE58|Q4LE58_HUMAN/tr|C9JF13|C9JF13_HUMAN		5.5	0		0	2	MASCOT		T
	R20180100087_1,13421	K.VEYTLGEESEAPGQR.A	1664.78	0.00435	2	1	80.62	0	3.94e-07	0|0	sp|Q04637|IF4G1_HUMAN/tr|B2RU06|B2RU06_HUMAN/tr|E7EX73|E7EX73_HUMAN/tr|H7C0V6|H7C0V6_HUMAN/tr|E7EUU4|E7EUU4_HUMAN/tr|B4DSI9|B4DSI9_HUMAN/tr|B4DGF1|B4DGF1_HUMAN/tr|Q96I65|Q96I65_HUMAN/tr|E9PGM1|E9PGM1_HUMAN/tr|B2RU10|B2RU10_HUMAN/tr|Q4LE58|Q4LE58_HUMAN		4.09	0		0	2	MASCOT		T
	R20180100087_1,14622	K.VPTTEKPTVTVNFR.K	1588.87	-0.00116	3	1	59.65	0	8.7e-05	0|0	sp|Q04637|IF4G1_HUMAN/tr|B2RU06|B2RU06_HUMAN/tr|E7EX73|E7EX73_HUMAN/tr|E7EUU4|E7EUU4_HUMAN/tr|B4DSI9|B4DSI9_HUMAN/tr|C9K073|C9K073_HUMAN/tr|C9J6B6|C9J6B6_HUMAN/tr|B4DGF1|B4DGF1_HUMAN/tr|E9PGM1|E9PGM1_HUMAN/tr|B2RU10|B2RU10_HUMAN/tr|Q4LE58|Q4LE58_HUMAN/tr|C9JF13|C9JF13_HUMAN		8.72	0		0	2	MASCOT		T
	R20180100087_1,14625	K.VPTTEKPTVTVNFR.K	1588.87	0.00103	2	1	54.11	0	0.000319	0|0	sp|Q04637|IF4G1_HUMAN/tr|B2RU06|B2RU06_HUMAN/tr|E7EX73|E7EX73_HUMAN/tr|E7EUU4|E7EUU4_HUMAN/tr|B4DSI9|B4DSI9_HUMAN/tr|C9K073|C9K073_HUMAN/tr|C9J6B6|C9J6B6_HUMAN/tr|B4DGF1|B4DGF1_HUMAN/tr|E9PGM1|E9PGM1_HUMAN/tr|B2RU10|B2RU10_HUMAN/tr|Q4LE58|Q4LE58_HUMAN/tr|C9JF13|C9JF13_HUMAN		8.72	0		0	2	MASCOT		T
	R20180100087_1,4506	K.YLCDEQK.E	955.419	-0.00066	2	1	23.7	0	0.545	0|0	sp|Q04637|IF4G1_HUMAN/tr|B2RU06|B2RU06_HUMAN/tr|E7EX73|E7EX73_HUMAN/tr|E7EUU4|E7EUU4_HUMAN/tr|B4DSI9|B4DSI9_HUMAN/tr|B4DGF1|B4DGF1_HUMAN/tr|Q96I65|Q96I65_HUMAN/tr|E9PGM1|E9PGM1_HUMAN/tr|B2RU10|B2RU10_HUMAN/tr|Q4LE58|Q4LE58_HUMAN		4.37	0		0	2	MASCOT		T
	R20180100087_1,5003	R.ERPSQPEGLR.K	1168.61	-0.00244	2	1	27.17	0	0.178	0|0	sp|Q04637|IF4G1_HUMAN/tr|B2RU06|B2RU06_HUMAN/tr|E7EX73|E7EX73_HUMAN/tr|E7EUU4|E7EUU4_HUMAN/tr|B4DSI9|B4DSI9_HUMAN/tr|B4DGF1|B4DGF1_HUMAN/tr|Q96I65|Q96I65_HUMAN/tr|E9PGM1|E9PGM1_HUMAN/tr|B2RU10|B2RU10_HUMAN/tr|Q4LE58|Q4LE58_HUMAN		6.24	0		0	2	MASCOT		T
	R20180100087_1,15910	R.FSALQQAVPTESTDNR.R	1763.86	0.00158	2	1	66.56	0	2.39e-05	0|0	sp|Q04637|IF4G1_HUMAN/tr|B2RU06|B2RU06_HUMAN/tr|E7EX73|E7EX73_HUMAN/tr|H7C044|H7C044_HUMAN/tr|E7EUU4|E7EUU4_HUMAN/tr|B4DSI9|B4DSI9_HUMAN/tr|B4DGF1|B4DGF1_HUMAN/tr|Q96I65|Q96I65_HUMAN/tr|E9PGM1|E9PGM1_HUMAN/tr|B2RU10|B2RU10_HUMAN/tr|Q4LE58|Q4LE58_HUMAN		4.37	0		0	2	MASCOT		T
	R20180100087_1,13981	R.FSALQQAVPTESTDNRR.V	1919.96	-0.00083	3	1	34.89	0	0.0375	0|0	sp|Q04637|IF4G1_HUMAN/tr|B2RU06|B2RU06_HUMAN/tr|E7EX73|E7EX73_HUMAN/tr|H7C044|H7C044_HUMAN/tr|E7EUU4|E7EUU4_HUMAN/tr|B4DSI9|B4DSI9_HUMAN/tr|B4DGF1|B4DGF1_HUMAN/tr|Q96I65|Q96I65_HUMAN/tr|E9PGM1|E9PGM1_HUMAN/tr|B2RU10|B2RU10_HUMAN/tr|Q4LE58|Q4LE58_HUMAN		6.07	1		0	2	MASCOT		T
	R20180100087_1,5214	R.HGVESTLER.S	1027.52	-0.00059	2	1	33.31	0	0.022	0|0	sp|Q04637|IF4G1_HUMAN/tr|B2RU06|B2RU06_HUMAN/tr|E7EX73|E7EX73_HUMAN/tr|E7EUU4|E7EUU4_HUMAN/tr|B4DSI9|B4DSI9_HUMAN/tr|B4DGF1|B4DGF1_HUMAN/tr|Q96I65|Q96I65_HUMAN/tr|E9PGM1|E9PGM1_HUMAN/tr|B2RU10|B2RU10_HUMAN/tr|Q4LE58|Q4LE58_HUMAN		5.4	0		0	2	MASCOT		T
	R20180100087_1,6743	R.LKEELEEAR.D	1116.59	-0.00269	2	1	44.44	0	0.00321	0|0	sp|Q04637|IF4G1_HUMAN/tr|B2RU06|B2RU06_HUMAN/tr|E7EX73|E7EX73_HUMAN/tr|E7EUU4|E7EUU4_HUMAN/tr|B4DSI9|B4DSI9_HUMAN/tr|C9J6B6|C9J6B6_HUMAN/tr|B4DGF1|B4DGF1_HUMAN/tr|E9PGM1|E9PGM1_HUMAN/tr|B2RU10|B2RU10_HUMAN/tr|Q4LE58|Q4LE58_HUMAN/tr|C9JF13|C9JF13_HUMAN		4.49	1		0	2	MASCOT		T
	R20180100087_1,6758	R.LKEELEEAR.D	1116.59	0.00111	3	1	39.33	0	0.0102	0|0	sp|Q04637|IF4G1_HUMAN/tr|B2RU06|B2RU06_HUMAN/tr|E7EX73|E7EX73_HUMAN/tr|E7EUU4|E7EUU4_HUMAN/tr|B4DSI9|B4DSI9_HUMAN/tr|C9J6B6|C9J6B6_HUMAN/tr|B4DGF1|B4DGF1_HUMAN/tr|E9PGM1|E9PGM1_HUMAN/tr|B2RU10|B2RU10_HUMAN/tr|Q4LE58|Q4LE58_HUMAN/tr|C9JF13|C9JF13_HUMAN		4.49	1		0	2	MASCOT		T
	R20180100087_1,26583	R.LQGINCGPDFTPSFANLGR.T	2064	-0.00258	2	1	128.07	0	2.98e-11	0|0	sp|Q04637|IF4G1_HUMAN/tr|B2RU06|B2RU06_HUMAN/tr|E7EX73|E7EX73_HUMAN/tr|E7EUU4|E7EUU4_HUMAN/tr|B4DSI9|B4DSI9_HUMAN/tr|C9K073|C9K073_HUMAN/tr|C9J6B6|C9J6B6_HUMAN/tr|B4DGF1|B4DGF1_HUMAN/tr|C9J2Z7|C9J2Z7_HUMAN/tr|E9PGM1|E9PGM1_HUMAN/tr|B2RU10|B2RU10_HUMAN/tr|Q4LE58|Q4LE58_HUMAN/tr|C9JF13|C9JF13_HUMAN		5.83	0		0	2	MASCOT		T
	R20180100087_1,1977	R.TAADKDRGEEDADGSK.T	1664.74	0.00014	3	1	33.46	0	0.00895	0|0	sp|Q04637|IF4G1_HUMAN/tr|B2RU06|B2RU06_HUMAN/tr|E7EX73|E7EX73_HUMAN/tr|E7EUU4|E7EUU4_HUMAN/tr|C9K073|C9K073_HUMAN/tr|C9J6B6|C9J6B6_HUMAN/tr|B4DGF1|B4DGF1_HUMAN/tr|C9J2Z7|C9J2Z7_HUMAN/tr|E9PGM1|E9PGM1_HUMAN/tr|B2RU10|B2RU10_HUMAN/tr|Q4LE58|Q4LE58_HUMAN/tr|C9JF13|C9JF13_HUMAN		4.23	2		0	2	MASCOT		T
$22-1	tr|B3KX11|B3KX11_HUMAN T-complex protein 1 subunit gamma OS=Homo sapiens PE=2 SV=1	34	26	0.5594	57945.2	6.51
$22-2	tr|Q59H77|Q59H77_HUMAN T-complex protein 1 subunit gamma (Fragment) OS=Homo sapiens PE=2 SV=1	34	26	0.5061	63575.5	6.05
$22-3	sp|P49368|TCPG_HUMAN T-complex protein 1 subunit gamma OS=Homo sapiens GN=CCT3 PE=1 SV=4	34	26	0.5358	60533.3	6.1
	R20180100087_1,22482	K.ALDDMISTLK.K ! K.ALDDMISTLK.-	1106.58	-0.00232	2	1	62.2	0	5.74e-05	0|0	sp|P49368|TCPG_HUMAN/tr|B4DUR8|B4DUR8_HUMAN/tr|Q2TU64|Q2TU64_HUMAN/tr|E9PRC8|E9PRC8_HUMAN/tr|Q5SZX6|Q5SZX6_HUMAN/tr|E9PQ35|E9PQ35_HUMAN/tr|B3KX11|B3KX11_HUMAN/tr|Q59H77|Q59H77_HUMAN/tr|Q5SZW8|Q5SZW8_HUMAN/tr|E9PM09|E9PM09_HUMAN ! tr|Q5SZX9|Q5SZX9_HUMAN		4.21	0		0	2	MASCOT		T
	R20180100087_1,12990	K.EILSEVER.N	974.515	0.00051	2	1	72.93	0	5.48e-06	0|0	sp|P49368|TCPG_HUMAN/tr|B4DUR8|B4DUR8_HUMAN/tr|Q2TU64|Q2TU64_HUMAN/tr|B3KX11|B3KX11_HUMAN/tr|Q59H77|Q59H77_HUMAN		4.25	0		0	2	MASCOT		T
	R20180100087_1,27348	K.ELGIWEPLAVK.L	1254.71	-0.00044	2	1	41.7	0	0.00357	0|0	sp|P49368|TCPG_HUMAN/tr|B4DUR8|B4DUR8_HUMAN/tr|Q2TU64|Q2TU64_HUMAN/tr|B3KX11|B3KX11_HUMAN/tr|Q59H77|Q59H77_HUMAN		4.53	0		0	2	MASCOT		T
	R20180100087_1,10422	K.GESQTDIEITR.E	1248.61	-0.0002	2	1	56.28	0	0.000153	0|0	sp|P49368|TCPG_HUMAN/tr|B4DUR8|B4DUR8_HUMAN/tr|Q2TU64|Q2TU64_HUMAN/tr|B3KX11|B3KX11_HUMAN/tr|Q59H77|Q59H77_HUMAN		4.14	0		0	2	MASCOT		T
	R20180100087_1,23814	K.GISDLAQHYLMR.A	1403.71	0.0007	3	1	41.46	0	0.00541	0|0	sp|P49368|TCPG_HUMAN/tr|B4DUR8|B4DUR8_HUMAN/tr|Q2TU64|Q2TU64_HUMAN/tr|B3KX11|B3KX11_HUMAN/tr|Q59H77|Q59H77_HUMAN		6.74	0		0	2	MASCOT		T
	R20180100087_1,23867	K.GISDLAQHYLMR.A	1403.71	0.00223	2	1	72.54	0	4.3e-06	0|0	sp|P49368|TCPG_HUMAN/tr|B4DUR8|B4DUR8_HUMAN/tr|Q2TU64|Q2TU64_HUMAN/tr|B3KX11|B3KX11_HUMAN/tr|Q59H77|Q59H77_HUMAN		6.74	0		0	2	MASCOT		T
	R20180100087_1,20350	K.HTQENCETWGVNGETGTLVDMK.E	2506.1	0.00079	3	1	39.2	0	0.00182	0|0	sp|P49368|TCPG_HUMAN/tr|B4DUR8|B4DUR8_HUMAN/tr|Q2TU64|Q2TU64_HUMAN/tr|B3KX11|B3KX11_HUMAN/tr|Q59H77|Q59H77_HUMAN		4.4	0		0	2	MASCOT		T
	R20180100087_1,20459	K.HTQENCETWGVNGETGTLVDMK.E	2506.1	-0.00919	2	1	64.52	0	2.19e-05	0|0	sp|P49368|TCPG_HUMAN/tr|B4DUR8|B4DUR8_HUMAN/tr|Q2TU64|Q2TU64_HUMAN/tr|B3KX11|B3KX11_HUMAN/tr|Q59H77|Q59H77_HUMAN		4.4	0		0	2	MASCOT		T
	R20180100087_1,27162	K.IGDEYFTFITDCK.D	1608.73	-0.00091	2	1	92	0	2.28e-08	0|0	sp|P49368|TCPG_HUMAN/tr|B4DUR8|B4DUR8_HUMAN/tr|Q2TU64|Q2TU64_HUMAN/tr|B3KX11|B3KX11_HUMAN/tr|Q59H77|Q59H77_HUMAN		4.03	0		0	2	MASCOT		T
	R20180100087_1,21616	K.IPGGIIEDSCVLR.G	1428.75	-0.00092	2	1	55.28	0	0.000283	0|0	sp|P49368|TCPG_HUMAN/tr|B4DUR8|B4DUR8_HUMAN/tr|Q2TU64|Q2TU64_HUMAN/tr|E9PRC8|E9PRC8_HUMAN/tr|Q5SZX6|Q5SZX6_HUMAN/tr|E9PQ35|E9PQ35_HUMAN/tr|B3KX11|B3KX11_HUMAN/tr|Q59H77|Q59H77_HUMAN		4.37	0		0	2	MASCOT		T
	R20180100087_1,30603	K.ISIPVDISDSDMMLNIINSSITTK.A	2607.33	-0.00076	2	1	96.92	0	1.37e-08	0|0	sp|P49368|TCPG_HUMAN/tr|B4DUR8|B4DUR8_HUMAN/tr|Q2TU64|Q2TU64_HUMAN/tr|E9PRC8|E9PRC8_HUMAN/tr|Q5SZX6|Q5SZX6_HUMAN/tr|E9PQ35|E9PQ35_HUMAN/tr|B3KX11|B3KX11_HUMAN/tr|Q59H77|Q59H77_HUMAN/tr|Q5SZW8|Q5SZW8_HUMAN/tr|E9PM09|E9PM09_HUMAN		3.93	0		0	2	MASCOT		T
	R20180100087_1,8297	K.KGESQTDIEITR.E	1376.7	0.00086	2	1	92.32	0	5.24e-08	0|0	sp|P49368|TCPG_HUMAN/tr|B4DUR8|B4DUR8_HUMAN/tr|Q2TU64|Q2TU64_HUMAN/tr|B3KX11|B3KX11_HUMAN/tr|Q59H77|Q59H77_HUMAN		4.68	1		0	2	MASCOT		T
	R20180100087_1,8357	K.KGESQTDIEITR.E	1376.7	-0.00017	3	1	45.87	0	0.00223	0|0	sp|P49368|TCPG_HUMAN/tr|B4DUR8|B4DUR8_HUMAN/tr|Q2TU64|Q2TU64_HUMAN/tr|B3KX11|B3KX11_HUMAN/tr|Q59H77|Q59H77_HUMAN		4.68	1		0	2	MASCOT		T
	R20180100087_1,25719	K.KIGDEYFTFITDCK.D	1736.82	-0.00716	2	1	59.37	0	7.26e-05	0|0	sp|P49368|TCPG_HUMAN/tr|B4DUR8|B4DUR8_HUMAN/tr|Q2TU64|Q2TU64_HUMAN/tr|B3KX11|B3KX11_HUMAN/tr|Q59H77|Q59H77_HUMAN		4.56	1		0	2	MASCOT		T
	R20180100087_1,28831	K.MLLDPMGGIVMTNDGNAILR.E	2131.07	-0.00151	2	1	92.94	0	4.03e-08	0|0	sp|P49368|TCPG_HUMAN/tr|B4DUR8|B4DUR8_HUMAN/tr|E9PRC8|E9PRC8_HUMAN/tr|Q5SZX6|Q5SZX6_HUMAN/tr|B3KX11|B3KX11_HUMAN/tr|Q59H77|Q59H77_HUMAN/tr|Q5SZX9|Q5SZX9_HUMAN		4.21	0		0	2	MASCOT		T
	R20180100087_1,28862	K.MLLDPMGGIVMTNDGNAILR.E	2131.07	-0.00034	3	1	68.29	0	1.14e-05	0|0	sp|P49368|TCPG_HUMAN/tr|B4DUR8|B4DUR8_HUMAN/tr|E9PRC8|E9PRC8_HUMAN/tr|Q5SZX6|Q5SZX6_HUMAN/tr|B3KX11|B3KX11_HUMAN/tr|Q59H77|Q59H77_HUMAN/tr|Q5SZX9|Q5SZX9_HUMAN		4.21	0		0	2	MASCOT		T
	R20180100087_1,3580	K.VQSGNINAAK.T ! K.VQSGNINAAK.I	1001.54	-0.00011	2	1	63.56	0	3.72e-05	0|0	sp|P49368|TCPG_HUMAN/tr|Q2TU64|Q2TU64_HUMAN/tr|E9PRC8|E9PRC8_HUMAN/tr|Q5SZX6|Q5SZX6_HUMAN/tr|B3KX11|B3KX11_HUMAN/tr|Q59H77|Q59H77_HUMAN/tr|E9PM09|E9PM09_HUMAN/tr|Q5SZX9|Q5SZX9_HUMAN ! tr|Q5SZW8|Q5SZW8_HUMAN		8.72	0		0	2	MASCOT		T
	R20180100087_1,20164	R.AVAQALEVIPR.T	1166.69	-0.00156	2	1	46.99	0	0.000521	0|0	sp|P49368|TCPG_HUMAN/tr|B4DUR8|B4DUR8_HUMAN/tr|Q2TU64|Q2TU64_HUMAN/tr|B3KX11|B3KX11_HUMAN/tr|Q59H77|Q59H77_HUMAN		6.05	0		0	2	MASCOT		T
	R20180100087_1,21823	R.EDDVGTGAGLLEIK.K	1416.72	0.00216	2	1	50.88	0	0.000629	0|0	sp|P49368|TCPG_HUMAN/tr|B4DUR8|B4DUR8_HUMAN/tr|B3KX11|B3KX11_HUMAN/tr|Q59H77|Q59H77_HUMAN		3.92	0		0	2	MASCOT		T
	R20180100087_1,4972	R.EEDFTR.I	796.347	-0.00128	2	1	23.53	0	0.642	0|0	sp|P49368|TCPG_HUMAN/tr|B4DUR8|B4DUR8_HUMAN/tr|Q2TU64|Q2TU64_HUMAN/tr|B3KX11|B3KX11_HUMAN/tr|Q59H77|Q59H77_HUMAN		4.14	0		0	2	MASCOT		T
	R20180100087_1,4825	R.EIQVQHPAAK.S	1120.61	-0.00041	2	1	37.15	0	0.0151	0|0	sp|P49368|TCPG_HUMAN/tr|B4DUR8|B4DUR8_HUMAN/tr|Q2TU64|Q2TU64_HUMAN/tr|E9PRC8|E9PRC8_HUMAN/tr|Q5SZX6|Q5SZX6_HUMAN/tr|B3KX11|B3KX11_HUMAN/tr|Q59H77|Q59H77_HUMAN/tr|Q5SZX9|Q5SZX9_HUMAN		6.85	0		0	2	MASCOT		T
	R20180100087_1,6484	R.IDDIVSGHK.K	983.516	-0.00053	3	1	31.38	0	0.0434	0|0	sp|P49368|TCPG_HUMAN/tr|B4DUR8|B4DUR8_HUMAN/tr|Q2TU64|Q2TU64_HUMAN/tr|B3KX11|B3KX11_HUMAN/tr|Q59H77|Q59H77_HUMAN		5.21	0		0	2	MASCOT		T
	R20180100087_1,6525	R.IDDIVSGHK.K	983.516	-0.00049	2	1	45.42	0	0.00171	0|0	sp|P49368|TCPG_HUMAN/tr|B4DUR8|B4DUR8_HUMAN/tr|Q2TU64|Q2TU64_HUMAN/tr|B3KX11|B3KX11_HUMAN/tr|Q59H77|Q59H77_HUMAN		5.21	0		0	2	MASCOT		T
	R20180100087_1,4530	R.IDDIVSGHKK.K	1111.61	0.00527	2	1	24.5	0	0.495	0|0	sp|P49368|TCPG_HUMAN/tr|B4DUR8|B4DUR8_HUMAN/tr|Q2TU64|Q2TU64_HUMAN/tr|B3KX11|B3KX11_HUMAN/tr|Q59H77|Q59H77_HUMAN		6.75	1		0	2	MASCOT		T
	R20180100087_1,30584	R.ILQM*EEEYIQQLCEDIIQLKPDVVITEK.G	3433.75	-0.00249	4	1	32.31	0	0.0435	0|0	sp|P49368|TCPG_HUMAN/tr|B4DUR8|B4DUR8_HUMAN/tr|Q2TU64|Q2TU64_HUMAN/tr|B3KX11|B3KX11_HUMAN/tr|Q59H77|Q59H77_HUMAN		4	0	15.994919 Oxidation (M)	0	2	MASCOT		T
	R20180100087_1,30961	R.ILQMEEEYIQQLCEDIIQLKPDVVITEK.G	3417.75	-0.00229	4	1	36.74	0	0.0161	0|0	sp|P49368|TCPG_HUMAN/tr|B4DUR8|B4DUR8_HUMAN/tr|Q2TU64|Q2TU64_HUMAN/tr|B3KX11|B3KX11_HUMAN/tr|Q59H77|Q59H77_HUMAN		4	0		0	2	MASCOT		T
	R20180100087_1,23604	R.IVLLDSSLEYK.K	1279.71	-0.00068	2	1	66.53	0	1.13e-05	0|0	sp|P49368|TCPG_HUMAN/tr|B4DUR8|B4DUR8_HUMAN/tr|Q2TU64|Q2TU64_HUMAN/tr|Q5SZX6|Q5SZX6_HUMAN/tr|B3KX11|B3KX11_HUMAN/tr|Q59H77|Q59H77_HUMAN		4.37	0		0	2	MASCOT		T
	R20180100087_1,23973	R.IVLLDSSLEYK.K	1279.71	0.01244	2	1	30.81	0	0.13	0|0	sp|P49368|TCPG_HUMAN/tr|B4DUR8|B4DUR8_HUMAN/tr|Q2TU64|Q2TU64_HUMAN/tr|Q5SZX6|Q5SZX6_HUMAN/tr|B3KX11|B3KX11_HUMAN/tr|Q59H77|Q59H77_HUMAN		4.37	0		0	2	MASCOT		T
	R20180100087_1,7658	R.IVSRPEELR.E	1098.63	0.00045	2	1	20.63	0	0.365	0|0	sp|P49368|TCPG_HUMAN/tr|B4DUR8|B4DUR8_HUMAN/tr|Q2TU64|Q2TU64_HUMAN/tr|B3KX11|B3KX11_HUMAN/tr|Q59H77|Q59H77_HUMAN		6.14	0		0	2	MASCOT		T
	R20180100087_1,21444	R.IVSRPEELREDDVGTGAGLLEIK.K	2496.33	-0.00101	3	1	24.77	0	0.16	0|0	sp|P49368|TCPG_HUMAN/tr|B4DUR8|B4DUR8_HUMAN/tr|B3KX11|B3KX11_HUMAN/tr|Q59H77|Q59H77_HUMAN		4.36	1		0	2	MASCOT		T
	R20180100087_1,21485	R.IVSRPEELREDDVGTGAGLLEIK.K	2496.33	-0.00287	4	1	21.48	0	0.337	0|0	sp|P49368|TCPG_HUMAN/tr|B4DUR8|B4DUR8_HUMAN/tr|B3KX11|B3KX11_HUMAN/tr|Q59H77|Q59H77_HUMAN		4.36	1		0	2	MASCOT		T
	R20180100087_1,19222	R.KALDDMISTLK.K ! R.KALDDMISTLK.-	1234.67	-0.0031	2	1	42.42	0	0.00429	0|0	sp|P49368|TCPG_HUMAN/tr|B4DUR8|B4DUR8_HUMAN/tr|Q2TU64|Q2TU64_HUMAN/tr|E9PRC8|E9PRC8_HUMAN/tr|Q5SZX6|Q5SZX6_HUMAN/tr|E9PQ35|E9PQ35_HUMAN/tr|B3KX11|B3KX11_HUMAN/tr|Q59H77|Q59H77_HUMAN/tr|Q5SZW8|Q5SZW8_HUMAN/tr|E9PM09|E9PM09_HUMAN ! tr|Q5SZX9|Q5SZX9_HUMAN		5.96	1		0	2	MASCOT		T
	R20180100087_1,13596	R.NLQDAMQVCR.N	1234.57	0.00029	2	1	49.06	0	0.000507	0|0	sp|P49368|TCPG_HUMAN/tr|B4DUR8|B4DUR8_HUMAN/tr|Q2TU64|Q2TU64_HUMAN/tr|B3KX11|B3KX11_HUMAN/tr|Q59H77|Q59H77_HUMAN		5.83	0		0	2	MASCOT		T
	R20180100087_1,27765	R.NVLLDPQLVPGGGASEMAVAHALTEK.S	2617.37	0.00105	3	1	65.54	0	1.93e-05	0|0	sp|P49368|TCPG_HUMAN/tr|B4DUR8|B4DUR8_HUMAN/tr|Q2TU64|Q2TU64_HUMAN/tr|B3KX11|B3KX11_HUMAN/tr|Q59H77|Q59H77_HUMAN		4.65	0		0	2	MASCOT		T
$23-1	tr|V9HW96|V9HW96_HUMAN Chaperonin containing TCP1, subunit 2 (Beta), isoform CRA_b OS=Homo sapiens GN=HEL-S-100n PE=2 SV=1	49	25	0.5832	57487.6	6.01
$23-2	sp|P78371|TCPB_HUMAN T-complex protein 1 subunit beta OS=Homo sapiens GN=CCT2 PE=1 SV=4	49	25	0.5832	57487.6	6.01
	R20180100087_1,5646	K.EAVAM*ESYAK.A	1114.51	0.00136	2	1	29.62	0	0.0278	0|0	sp|P78371|TCPB_HUMAN/tr|V9HW96|V9HW96_HUMAN/tr|F5GWF6|F5GWF6_HUMAN/tr|Q9H369|Q9H369_HUMAN/tr|B7Z4R3|B7Z4R3_HUMAN		4.53	0	15.994919 Oxidation (M)	0	2	MASCOT		T
	R20180100087_1,10441	K.EAVAMESYAK.A	1098.51	0.0032	2	1	43.17	0	0.00184	0|0	sp|P78371|TCPB_HUMAN/tr|V9HW96|V9HW96_HUMAN/tr|F5GWF6|F5GWF6_HUMAN/tr|Q9H369|Q9H369_HUMAN/tr|B7Z4R3|B7Z4R3_HUMAN		4.53	0		0	2	MASCOT		T
	R20180100087_1,16382	K.GSGNLEAIHIIK.K	1251.71	-0.00155	3	1	35.05	0	0.014	0|0	sp|P78371|TCPB_HUMAN/tr|V9HW96|V9HW96_HUMAN/tr|F5GWF6|F5GWF6_HUMAN/tr|F8VQ14|F8VQ14_HUMAN/tr|B7Z4R3|B7Z4R3_HUMAN		6.75	0		0	2	MASCOT		T
	R20180100087_1,16385	K.GSGNLEAIHIIK.K	1251.71	0.00137	2	1	43.22	0	0.00245	0|0	sp|P78371|TCPB_HUMAN/tr|V9HW96|V9HW96_HUMAN/tr|F5GWF6|F5GWF6_HUMAN/tr|F8VQ14|F8VQ14_HUMAN/tr|B7Z4R3|B7Z4R3_HUMAN		6.75	0		0	2	MASCOT		T
	R20180100087_1,11690	K.HGINCFINR.Q	1130.55	4e-05	2	1	35.78	0	0.0142	0|0	sp|P78371|TCPB_HUMAN/tr|V9HW96|V9HW96_HUMAN/tr|F5GWF6|F5GWF6_HUMAN/tr|F8VQ14|F8VQ14_HUMAN/tr|B7Z4R3|B7Z4R3_HUMAN		8.26	0		0	2	MASCOT		T
	R20180100087_1,11710	K.HGINCFINR.Q	1130.55	-0.00232	3	1	20.89	0	0.415	0|0	sp|P78371|TCPB_HUMAN/tr|V9HW96|V9HW96_HUMAN/tr|F5GWF6|F5GWF6_HUMAN/tr|F8VQ14|F8VQ14_HUMAN/tr|B7Z4R3|B7Z4R3_HUMAN		8.26	0		0	2	MASCOT		T
	R20180100087_1,4625	K.IGVNQPK.R	755.441	0.0001	2	1	35.26	0	0.00926	0|0	sp|P78371|TCPB_HUMAN/tr|V9HW96|V9HW96_HUMAN/tr|F5GWF6|F5GWF6_HUMAN/tr|F8VQ14|F8VQ14_HUMAN/tr|B7Z4R3|B7Z4R3_HUMAN		8.75	0		0	2	MASCOT		T
	R20180100087_1,19177	K.IHPQTIIAGWR.E	1291.73	-0.00259	2	1	45.97	0	0.00135	0|0	sp|P78371|TCPB_HUMAN/tr|V9HW96|V9HW96_HUMAN/tr|F5GWF6|F5GWF6_HUMAN/tr|F8VQ14|F8VQ14_HUMAN		9.76	0		0	2	MASCOT		T
	R20180100087_1,19284	K.IHPQTIIAGWR.E	1291.73	0.00045	3	1	35.74	0	0.0146	0|0	sp|P78371|TCPB_HUMAN/tr|V9HW96|V9HW96_HUMAN/tr|F5GWF6|F5GWF6_HUMAN/tr|F8VQ14|F8VQ14_HUMAN		9.76	0		0	2	MASCOT		T
	R20180100087_1,15051	K.ILIANTGMDTDK.I	1291.66	-0.00381	2	1	45.76	0	0.00208	0|0	sp|P78371|TCPB_HUMAN/tr|V9HW96|V9HW96_HUMAN/tr|F5GWF6|F5GWF6_HUMAN/tr|F8VQ14|F8VQ14_HUMAN		4.21	0		0	2	MASCOT		T
	R20180100087_1,16406	K.ILIANTGMDTDKIK.I	1532.84	0.00191	2	1	49.07	0	0.000823	0|0	sp|P78371|TCPB_HUMAN/tr|V9HW96|V9HW96_HUMAN/tr|F5GWF6|F5GWF6_HUMAN/tr|F8VQ14|F8VQ14_HUMAN		5.96	1		0	2	MASCOT		T
	R20180100087_1,17577	K.LAVEAVLR.L	870.541	-0.00142	2	1	40.31	0	0.00299	0|0	sp|P78371|TCPB_HUMAN/tr|V9HW96|V9HW96_HUMAN/tr|F5GWF6|F5GWF6_HUMAN/tr|F8VQ14|F8VQ14_HUMAN/tr|B7Z4R3|B7Z4R3_HUMAN		6	0		0	2	MASCOT		T
	R20180100087_1,27268	K.LIHFSGVALGEACTIVLR.G	1956.07	-0.00274	3	1	81.97	0	3.23e-07	0|0	sp|P78371|TCPB_HUMAN/tr|V9HW96|V9HW96_HUMAN/tr|F5GWF6|F5GWF6_HUMAN/tr|F8VQ14|F8VQ14_HUMAN/tr|Q9H369|Q9H369_HUMAN/tr|B7Z4R3|B7Z4R3_HUMAN		6.74	0		0	2	MASCOT		T
	R20180100087_1,3776	K.VAEIEHAEK.E	1025.53	0.00074	2	1	38.51	0	0.0145	0|0	sp|P78371|TCPB_HUMAN/tr|V9HW96|V9HW96_HUMAN/tr|F5GWF6|F5GWF6_HUMAN/tr|F8VQ14|F8VQ14_HUMAN/tr|B7Z4R3|B7Z4R3_HUMAN		4.75	0		0	2	MASCOT		T
	R20180100087_1,3725	K.VAEIEHAEKEK.M	1282.66	-0.00069	2	1	54.41	0	0.000517	0|0	sp|P78371|TCPB_HUMAN/tr|V9HW96|V9HW96_HUMAN/tr|F5GWF6|F5GWF6_HUMAN/tr|F8VQ14|F8VQ14_HUMAN/tr|B7Z4R3|B7Z4R3_HUMAN		4.91	1		0	2	MASCOT		T
	R20180100087_1,11000	K.VLVDMSR.V	819.439	-0.00083	2	1	41.32	0	0.0129	0|0	sp|P78371|TCPB_HUMAN/tr|V9HW96|V9HW96_HUMAN/tr|F5GWF6|F5GWF6_HUMAN/tr|F8VQ14|F8VQ14_HUMAN		5.81	0		0	2	MASCOT		T
	R20180100087_1,7798	R.AAHSEGNTTAGLDMR.E	1530.7	-0.00035	2	1	58.78	0	4.6e-05	0|0	sp|P78371|TCPB_HUMAN/tr|V9HW96|V9HW96_HUMAN/tr|Q9H369|Q9H369_HUMAN/tr|B7Z4R3|B7Z4R3_HUMAN		5.32	0		0	2	MASCOT		T
	R20180100087_1,7856	R.AAHSEGNTTAGLDMR.E	1530.7	0.0012	3	1	31.13	0	0.0266	0|0	sp|P78371|TCPB_HUMAN/tr|V9HW96|V9HW96_HUMAN/tr|Q9H369|Q9H369_HUMAN/tr|B7Z4R3|B7Z4R3_HUMAN		5.32	0		0	2	MASCOT		T
	R20180100087_1,22084	R.DASLMVTNDGATILK.N	1548.79	-0.00387	2	1	58.87	0	0.000141	0|0	sp|P78371|TCPB_HUMAN/tr|V9HW96|V9HW96_HUMAN/tr|F5GWF6|F5GWF6_HUMAN/tr|F8VQ14|F8VQ14_HUMAN/tr|B7Z4R3|B7Z4R3_HUMAN		4.21	0		0	2	MASCOT		T
	R20180100087_1,12930	R.EALLSSAVDHGSDEVK.F	1656.81	-4e-05	3	1	62.41	0	4.31e-05	0|0	sp|P78371|TCPB_HUMAN/tr|V9HW96|V9HW96_HUMAN/tr|F5GWF6|F5GWF6_HUMAN/tr|F8VQ14|F8VQ14_HUMAN		4.31	0		0	2	MASCOT		T
	R20180100087_1,12935	R.EALLSSAVDHGSDEVK.F	1656.81	0.00158	2	1	79.17	0	9.07e-07	0|0	sp|P78371|TCPB_HUMAN/tr|V9HW96|V9HW96_HUMAN/tr|F5GWF6|F5GWF6_HUMAN/tr|F8VQ14|F8VQ14_HUMAN		4.31	0		0	2	MASCOT		T
	R20180100087_1,30039	R.EGTIGDMAILGITESFQVK.R	2009.03	-0.0012	3	1	42.85	0	0.00443	0|0	sp|P78371|TCPB_HUMAN/tr|V9HW96|V9HW96_HUMAN/tr|Q9H369|Q9H369_HUMAN/tr|B7Z4R3|B7Z4R3_HUMAN		4.14	0		0	2	MASCOT		T
	R20180100087_1,30058	R.EGTIGDMAILGITESFQVK.R	2009.03	-0.0019	2	1	88.33	0	1.25e-07	0|0	sp|P78371|TCPB_HUMAN/tr|V9HW96|V9HW96_HUMAN/tr|Q9H369|Q9H369_HUMAN/tr|B7Z4R3|B7Z4R3_HUMAN		4.14	0		0	2	MASCOT		T
	R20180100087_1,15582	R.GATQQILDEAER.S	1330.66	7e-05	2	1	76.77	0	2.66e-06	0|0	sp|P78371|TCPB_HUMAN/tr|V9HW96|V9HW96_HUMAN/tr|F5GWF6|F5GWF6_HUMAN/tr|F8VQ14|F8VQ14_HUMAN/tr|Q9H369|Q9H369_HUMAN/tr|B7Z4R3|B7Z4R3_HUMAN		4.14	0		0	2	MASCOT		T
	R20180100087_1,27033	R.LALVTGGEIASTFDHPELVK.L	2097.12	0.0015	2	1	80.29	0	6.36e-07	0|0	sp|P78371|TCPB_HUMAN/tr|V9HW96|V9HW96_HUMAN/tr|F5GWF6|F5GWF6_HUMAN/tr|F8VQ14|F8VQ14_HUMAN/tr|B7Z4R3|B7Z4R3_HUMAN		4.65	0		0	2	MASCOT		T
	R20180100087_1,27114	R.LALVTGGEIASTFDHPELVK.L	2097.12	-0.00036	3	1	56.68	0	0.000141	0|0	sp|P78371|TCPB_HUMAN/tr|V9HW96|V9HW96_HUMAN/tr|F5GWF6|F5GWF6_HUMAN/tr|F8VQ14|F8VQ14_HUMAN/tr|B7Z4R3|B7Z4R3_HUMAN		4.65	0		0	2	MASCOT		T
	R20180100087_1,32591	R.LALVTGGEIASTFDHPELVK.L	2097.12	-0.00393	3	1	25.86	0	0.167	0|0	sp|P78371|TCPB_HUMAN/tr|V9HW96|V9HW96_HUMAN/tr|F5GWF6|F5GWF6_HUMAN/tr|F8VQ14|F8VQ14_HUMAN/tr|B7Z4R3|B7Z4R3_HUMAN		4.65	0		0	2	MASCOT		T
	R20180100087_1,29721	R.LTSFIGAIAIGDLVK.S	1517.89	0.00033	2	1	77.18	0	4.25e-07	0|0	sp|P78371|TCPB_HUMAN/tr|V9HW96|V9HW96_HUMAN/tr|F5GWF6|F5GWF6_HUMAN/tr|F8VQ14|F8VQ14_HUMAN/tr|B7Z4R3|B7Z4R3_HUMAN		5.84	0		0	2	MASCOT		T
	R20180100087_1,29727	R.LTSFIGAIAIGDLVK.S	1517.89	9e-05	3	1	60.6	0	1.93e-05	0|0	sp|P78371|TCPB_HUMAN/tr|V9HW96|V9HW96_HUMAN/tr|F5GWF6|F5GWF6_HUMAN/tr|F8VQ14|F8VQ14_HUMAN/tr|B7Z4R3|B7Z4R3_HUMAN		5.84	0		0	2	MASCOT		T
	R20180100087_1,28587	R.MLPTIIADNAGYDSADLVAQLR.A	2347.2	-0.00243	2	1	128.18	0	1.14e-11	0|0	sp|P78371|TCPB_HUMAN/tr|V9HW96|V9HW96_HUMAN/tr|F5GWF6|F5GWF6_HUMAN/tr|Q9H369|Q9H369_HUMAN/tr|B7Z4R3|B7Z4R3_HUMAN		3.93	0		0	2	MASCOT		T
	R20180100087_1,32576	R.MLPTIIADNAGYDSADLVAQLR.A	2347.2	0.00225	3	1	61.16	0	5.73e-05	0|0	sp|P78371|TCPB_HUMAN/tr|V9HW96|V9HW96_HUMAN/tr|F5GWF6|F5GWF6_HUMAN/tr|Q9H369|Q9H369_HUMAN/tr|B7Z4R3|B7Z4R3_HUMAN		3.93	0		0	2	MASCOT		T
	R20180100087_1,33763	R.MLPTIIADNAGYDSADLVAQLR.A	2347.2	0.02475	3	1	32.08	0	0.0498	0|0	sp|P78371|TCPB_HUMAN/tr|V9HW96|V9HW96_HUMAN/tr|F5GWF6|F5GWF6_HUMAN/tr|Q9H369|Q9H369_HUMAN/tr|B7Z4R3|B7Z4R3_HUMAN		3.93	0		0	2	MASCOT		T
	R20180100087_1,22359	R.QDLMNIAGTTLSSK.L	1478.75	0.00042	2	1	86.21	0	2.16e-07	0|0	sp|P78371|TCPB_HUMAN/tr|V9HW96|V9HW96_HUMAN/tr|F5GWF6|F5GWF6_HUMAN/tr|F8VQ14|F8VQ14_HUMAN/tr|B7Z4R3|B7Z4R3_HUMAN		5.84	0		0	2	MASCOT		T
	R20180100087_1,22395	R.QDLMNIAGTTLSSK.L	1478.75	0	3	1	49.06	0	0.00112	0|0	sp|P78371|TCPB_HUMAN/tr|V9HW96|V9HW96_HUMAN/tr|F5GWF6|F5GWF6_HUMAN/tr|F8VQ14|F8VQ14_HUMAN/tr|B7Z4R3|B7Z4R3_HUMAN		5.84	0		0	2	MASCOT		T
	R20180100087_1,29266	R.QVLLSAAEAAEVILR.V	1582.92	-0.00053	3	1	83.45	0	1.36e-07	0|0	sp|P78371|TCPB_HUMAN/tr|V9HW96|V9HW96_HUMAN/tr|Q9H369|Q9H369_HUMAN/tr|B7Z4R3|B7Z4R3_HUMAN		4.53	0		0	2	MASCOT		T
	R20180100087_1,29322	R.QVLLSAAEAAEVILR.V	1582.92	-0.0016	2	1	83.43	0	1.35e-07	0|0	sp|P78371|TCPB_HUMAN/tr|V9HW96|V9HW96_HUMAN/tr|Q9H369|Q9H369_HUMAN/tr|B7Z4R3|B7Z4R3_HUMAN		4.53	0		0	2	MASCOT		T
	R20180100087_1,29983	R.QVLLSAAEAAEVILR.V	1582.92	-0.00275	3	1	65.2	0	9.04e-06	0|0	sp|P78371|TCPB_HUMAN/tr|V9HW96|V9HW96_HUMAN/tr|Q9H369|Q9H369_HUMAN/tr|B7Z4R3|B7Z4R3_HUMAN		4.53	0		0	2	MASCOT		T
	R20180100087_1,30724	R.QVLLSAAEAAEVILR.V	1582.92	-0.00131	3	1	69.1	0	9.31e-06	0|0	sp|P78371|TCPB_HUMAN/tr|V9HW96|V9HW96_HUMAN/tr|Q9H369|Q9H369_HUMAN/tr|B7Z4R3|B7Z4R3_HUMAN		4.53	0		0	2	MASCOT		T
	R20180100087_1,31194	R.QVLLSAAEAAEVILR.V	1582.92	0	2	1	64.92	0	9.73e-06	0|0	sp|P78371|TCPB_HUMAN/tr|V9HW96|V9HW96_HUMAN/tr|Q9H369|Q9H369_HUMAN/tr|B7Z4R3|B7Z4R3_HUMAN		4.53	0		0	2	MASCOT		T
	R20180100087_1,31363	R.QVLLSAAEAAEVILR.V	1582.92	-2e-05	3	1	47.14	0	0.000583	0|0	sp|P78371|TCPB_HUMAN/tr|V9HW96|V9HW96_HUMAN/tr|Q9H369|Q9H369_HUMAN/tr|B7Z4R3|B7Z4R3_HUMAN		4.53	0		0	2	MASCOT		T
	R20180100087_1,31906	R.QVLLSAAEAAEVILR.V	1582.92	-0.00088	2	1	51.41	0	0.000218	0|0	sp|P78371|TCPB_HUMAN/tr|V9HW96|V9HW96_HUMAN/tr|Q9H369|Q9H369_HUMAN/tr|B7Z4R3|B7Z4R3_HUMAN		4.53	0		0	2	MASCOT		T
	R20180100087_1,32570	R.QVLLSAAEAAEVILR.V	1582.92	-0.00218	2	1	70.41	0	2.71e-06	0|0	sp|P78371|TCPB_HUMAN/tr|V9HW96|V9HW96_HUMAN/tr|Q9H369|Q9H369_HUMAN/tr|B7Z4R3|B7Z4R3_HUMAN		4.53	0		0	2	MASCOT		T
	R20180100087_1,32739	R.QVLLSAAEAAEVILR.V	1582.92	0.00079	3	1	53.56	0	0.000353	0|0	sp|P78371|TCPB_HUMAN/tr|V9HW96|V9HW96_HUMAN/tr|Q9H369|Q9H369_HUMAN/tr|B7Z4R3|B7Z4R3_HUMAN		4.53	0		0	2	MASCOT		T
	R20180100087_1,33474	R.QVLLSAAEAAEVILR.V	1582.92	0.00092	2	1	41.92	0	0.00212	0|0	sp|P78371|TCPB_HUMAN/tr|V9HW96|V9HW96_HUMAN/tr|Q9H369|Q9H369_HUMAN/tr|B7Z4R3|B7Z4R3_HUMAN		4.53	0		0	2	MASCOT		T
	R20180100087_1,26979	R.SLHDALCVLAQTVK.D	1554.83	-0.00011	3	1	52.5	0	0.000376	0|0	sp|P78371|TCPB_HUMAN/tr|V9HW96|V9HW96_HUMAN/tr|F5GWF6|F5GWF6_HUMAN/tr|F8VQ14|F8VQ14_HUMAN/tr|Q9H369|Q9H369_HUMAN/tr|B7Z4R3|B7Z4R3_HUMAN		6.46	0		0	2	MASCOT		T
	R20180100087_1,26988	R.SLHDALCVLAQTVK.D	1554.83	0.00209	2	1	83.42	0	3.19e-07	0|0	sp|P78371|TCPB_HUMAN/tr|V9HW96|V9HW96_HUMAN/tr|F5GWF6|F5GWF6_HUMAN/tr|F8VQ14|F8VQ14_HUMAN/tr|Q9H369|Q9H369_HUMAN/tr|B7Z4R3|B7Z4R3_HUMAN		6.46	0		0	2	MASCOT		T
	R20180100087_1,26192	R.TVYGGGCSEMLMAHAVTQLANR.T	2366.1	-0.0007	3	1	90.95	0	4.9e-08	0|0	sp|P78371|TCPB_HUMAN/tr|V9HW96|V9HW96_HUMAN/tr|F5GWF6|F5GWF6_HUMAN/tr|Q9H369|Q9H369_HUMAN/tr|B7Z4R3|B7Z4R3_HUMAN		6.41	0		0	2	MASCOT		T
	R20180100087_1,26213	R.TVYGGGCSEMLMAHAVTQLANR.T	2366.1	-0.00401	2	1	135.33	0	1.84e-12	0|0	sp|P78371|TCPB_HUMAN/tr|V9HW96|V9HW96_HUMAN/tr|F5GWF6|F5GWF6_HUMAN/tr|Q9H369|Q9H369_HUMAN/tr|B7Z4R3|B7Z4R3_HUMAN		6.41	0		0	2	MASCOT		T
	R20180100087_1,840	R.VDSTAK.V	620.325	-0.00024	2	1	33	0	0.0494	0|0	sp|P78371|TCPB_HUMAN/tr|V9HW96|V9HW96_HUMAN/tr|F5GWF6|F5GWF6_HUMAN/tr|F8VQ14|F8VQ14_HUMAN/tr|B7Z4R3|B7Z4R3_HUMAN		5.81	0		0	2	MASCOT		T
$24-1	tr|B4DT47|B4DT47_HUMAN cDNA FLJ54507, highly similar to Heat shock 70 kDa protein 4 OS=Homo sapiens PE=2 SV=1	37	25	0.4591	77363.6	4.99
	R20180100087_1,21791	-.MDATQIAGLNCLR.L	1462.71	0.00235	2	1	72.24	0	3.87e-06	0|0	tr|B4DT47|B4DT47_HUMAN		5.59	0		0	2	MASCOT		T
	R20180100087_1,2946	K.AESEEM*ETSQAGSK.D	1499.62	0.00109	2	1	87.33	0	1.18e-08	0|0	sp|P34932|HSP74_HUMAN/tr|B4DSE8|B4DSE8_HUMAN/tr|Q59GF8|Q59GF8_HUMAN/tr|B4DT47|B4DT47_HUMAN/tr|B4DH02|B4DH02_HUMAN/tr|A0A087WYC1|A0A087WYC1_HUMAN/tr|B4DUS3|B4DUS3_HUMAN/tr|B4E354|B4E354_HUMAN/tr|B4DIZ3|B4DIZ3_HUMAN/tr|V9HW33|V9HW33_HUMAN/tr|B4E0H6|B4E0H6_HUMAN		4.09	0	15.994919 Oxidation (M)	0	2	MASCOT		T
	R20180100087_1,4466	K.AESEEMETSQAGSK.D	1483.62	-0.00071	2	1	90.5	0	7.71e-09	0|0	sp|P34932|HSP74_HUMAN/tr|B4DSE8|B4DSE8_HUMAN/tr|Q59GF8|Q59GF8_HUMAN/tr|B4DT47|B4DT47_HUMAN/tr|B4DH02|B4DH02_HUMAN/tr|A0A087WYC1|A0A087WYC1_HUMAN/tr|B4DUS3|B4DUS3_HUMAN/tr|B4E354|B4E354_HUMAN/tr|B4DIZ3|B4DIZ3_HUMAN/tr|V9HW33|V9HW33_HUMAN/tr|B4E0H6|B4E0H6_HUMAN		4.09	0		0	2	MASCOT		T
	R20180100087_1,15352	K.ELSTTLNADEAVTR.G	1519.76	-0.0004	2	1	85.12	0	1.41e-06	0|0	sp|P34932|HSP74_HUMAN/tr|Q59GF8|Q59GF8_HUMAN/tr|B4DT47|B4DT47_HUMAN/tr|O14992|O14992_HUMAN/tr|B4DH02|B4DH02_HUMAN/tr|A0A087WYC1|A0A087WYC1_HUMAN/tr|B4DUS3|B4DUS3_HUMAN/tr|A0A087WTS8|A0A087WTS8_HUMAN/tr|B4E354|B4E354_HUMAN/tr|B4DIZ3|B4DIZ3_HUMAN/tr|V9HW33|V9HW33_HUMAN/tr|B4E0H6|B4E0H6_HUMAN		4.14	0		0	2	MASCOT		T
	R20180100087_1,26007	K.FDEVLVNHFCEEFGK.K	1869.85	-0.00042	3	1	51.38	0	0.000218	0|0	sp|P34932|HSP74_HUMAN/tr|Q59GF8|Q59GF8_HUMAN/tr|B4DT47|B4DT47_HUMAN/tr|O14992|O14992_HUMAN/tr|B4DH02|B4DH02_HUMAN/tr|A0A087WYC1|A0A087WYC1_HUMAN/tr|B4DUS3|B4DUS3_HUMAN/tr|A0A087WTS8|A0A087WTS8_HUMAN/tr|B4E354|B4E354_HUMAN/tr|B4DIZ3|B4DIZ3_HUMAN/tr|V9HW33|V9HW33_HUMAN/tr|Q7KYN0|Q7KYN0_HUMAN		4.4	0		0	2	MASCOT		T
	R20180100087_1,26008	K.FDEVLVNHFCEEFGK.K	1869.85	-0.0059	2	1	73.27	0	6.26e-06	0|0	sp|P34932|HSP74_HUMAN/tr|Q59GF8|Q59GF8_HUMAN/tr|B4DT47|B4DT47_HUMAN/tr|O14992|O14992_HUMAN/tr|B4DH02|B4DH02_HUMAN/tr|A0A087WYC1|A0A087WYC1_HUMAN/tr|B4DUS3|B4DUS3_HUMAN/tr|A0A087WTS8|A0A087WTS8_HUMAN/tr|B4E354|B4E354_HUMAN/tr|B4DIZ3|B4DIZ3_HUMAN/tr|V9HW33|V9HW33_HUMAN/tr|Q7KYN0|Q7KYN0_HUMAN		4.4	0		0	2	MASCOT		T
	R20180100087_1,19311	K.FLEM*CNDLLAR.V	1397.66	0.0012	2	1	60.24	0	0.000137	0|0	sp|P34932|HSP74_HUMAN/tr|Q59GF8|Q59GF8_HUMAN/tr|B4DT47|B4DT47_HUMAN/tr|O14992|O14992_HUMAN/tr|B4DH02|B4DH02_HUMAN/tr|A0A087WYC1|A0A087WYC1_HUMAN/tr|B4DUS3|B4DUS3_HUMAN/tr|A0A087WTS8|A0A087WTS8_HUMAN/tr|B4E354|B4E354_HUMAN/tr|B4DIZ3|B4DIZ3_HUMAN/tr|V9HW33|V9HW33_HUMAN/tr|B4E0H6|B4E0H6_HUMAN		4.37	0	15.994919 Oxidation (M)	0	2	MASCOT		T
	R20180100087_1,24801	K.FLEMCNDLLAR.V	1381.66	0.00132	2	1	70.41	0	2.41e-05	0|0	sp|P34932|HSP74_HUMAN/tr|Q59GF8|Q59GF8_HUMAN/tr|B4DT47|B4DT47_HUMAN/tr|O14992|O14992_HUMAN/tr|B4DH02|B4DH02_HUMAN/tr|A0A087WYC1|A0A087WYC1_HUMAN/tr|B4DUS3|B4DUS3_HUMAN/tr|A0A087WTS8|A0A087WTS8_HUMAN/tr|B4E354|B4E354_HUMAN/tr|B4DIZ3|B4DIZ3_HUMAN/tr|V9HW33|V9HW33_HUMAN/tr|B4E0H6|B4E0H6_HUMAN		4.37	0		0	2	MASCOT		T
	R20180100087_1,19351	K.KEDIYAVEIVGGATR.I	1620.86	-0.00018	2	1	69.85	0	8.17e-06	0|0	sp|P34932|HSP74_HUMAN/tr|Q59GF8|Q59GF8_HUMAN/tr|B4DT47|B4DT47_HUMAN/tr|O14992|O14992_HUMAN/tr|B4DH02|B4DH02_HUMAN/tr|A0A087WYC1|A0A087WYC1_HUMAN/tr|B4DUS3|B4DUS3_HUMAN/tr|A0A087WTS8|A0A087WTS8_HUMAN/tr|B4E354|B4E354_HUMAN/tr|B4DIZ3|B4DIZ3_HUMAN/tr|V9HW33|V9HW33_HUMAN/tr|B4E0H6|B4E0H6_HUMAN		4.68	1		0	2	MASCOT		T
	R20180100087_1,19395	K.KEDIYAVEIVGGATR.I	1620.86	0.0021	3	1	40.36	0	0.00752	0|0	sp|P34932|HSP74_HUMAN/tr|Q59GF8|Q59GF8_HUMAN/tr|B4DT47|B4DT47_HUMAN/tr|O14992|O14992_HUMAN/tr|B4DH02|B4DH02_HUMAN/tr|A0A087WYC1|A0A087WYC1_HUMAN/tr|B4DUS3|B4DUS3_HUMAN/tr|A0A087WTS8|A0A087WTS8_HUMAN/tr|B4E354|B4E354_HUMAN/tr|B4DIZ3|B4DIZ3_HUMAN/tr|V9HW33|V9HW33_HUMAN/tr|B4E0H6|B4E0H6_HUMAN		4.68	1		0	2	MASCOT		T
	R20180100087_1,16694	K.KLPEMDID.-	960.471	-0.00082	2	1	23.21	0	0.335	0|0	sp|P34932|HSP74_HUMAN/tr|B0AZT0|B0AZT0_HUMAN/tr|B4DSE8|B4DSE8_HUMAN/tr|B4DT47|B4DT47_HUMAN/tr|B0AZS1|B0AZS1_HUMAN/tr|B4DH02|B4DH02_HUMAN/tr|B4DUS3|B4DUS3_HUMAN/tr|B4E354|B4E354_HUMAN/tr|B4DIZ3|B4DIZ3_HUMAN/tr|V9HW33|V9HW33_HUMAN/tr|B0AZU6|B0AZU6_HUMAN/tr|B4E0H6|B4E0H6_HUMAN/tr|B4DN48|B4DN48_HUMAN		4.27	1		0	2	MASCOT		T
	R20180100087_1,3163	K.KMDQPPQAK.K	1042.53	0.00013	3	1	25.28	0	0.175	0|0	sp|P34932|HSP74_HUMAN/tr|B4DSE8|B4DSE8_HUMAN/tr|Q59GF8|Q59GF8_HUMAN/tr|B4DT47|B4DT47_HUMAN/tr|B4DH02|B4DH02_HUMAN/tr|B4DUS3|B4DUS3_HUMAN/tr|B4E354|B4E354_HUMAN/tr|B4DIZ3|B4DIZ3_HUMAN/tr|V9HW33|V9HW33_HUMAN/tr|B0AZU6|B0AZU6_HUMAN/tr|B4E0H6|B4E0H6_HUMAN		8.59	1		0	2	MASCOT		T
	R20180100087_1,20851	K.LEDTENWLYEDGEDQPK.Q	2080.9	0.00264	2	1	64.49	0	6.15e-06	0|0	sp|P34932|HSP74_HUMAN/tr|B4DSE8|B4DSE8_HUMAN/tr|Q59GF8|Q59GF8_HUMAN/tr|B4DT47|B4DT47_HUMAN/tr|B0AZS1|B0AZS1_HUMAN/tr|B4DH02|B4DH02_HUMAN/tr|A0A087WYC1|A0A087WYC1_HUMAN/tr|B4DUS3|B4DUS3_HUMAN/tr|B4E354|B4E354_HUMAN/tr|B4DIZ3|B4DIZ3_HUMAN/tr|V9HW33|V9HW33_HUMAN/tr|B0AZU6|B0AZU6_HUMAN/tr|B4E0H6|B4E0H6_HUMAN		3.66	0		0	2	MASCOT		T
	R20180100087_1,15297	K.LFEELGK.Q	835.456	0.00093	2	1	37.73	0	0.0128	0|0	sp|P34932|HSP74_HUMAN/tr|Q59GF8|Q59GF8_HUMAN/tr|B4DT47|B4DT47_HUMAN/tr|B0AZS1|B0AZS1_HUMAN/tr|B4DH02|B4DH02_HUMAN/tr|B4DUS3|B4DUS3_HUMAN/tr|B4E354|B4E354_HUMAN/tr|B4DIZ3|B4DIZ3_HUMAN/tr|V9HW33|V9HW33_HUMAN/tr|B0AZU6|B0AZU6_HUMAN/tr|B4E0H6|B4E0H6_HUMAN		4.53	0		0	2	MASCOT		T
	R20180100087_1,10300	K.MQVDQEEPHVEEQQQQTPAENK.A	2622.17	0.00028	3	1	55.1	0	6.71e-05	0|0	sp|P34932|HSP74_HUMAN/tr|B4DSE8|B4DSE8_HUMAN/tr|Q59GF8|Q59GF8_HUMAN/tr|B4DT47|B4DT47_HUMAN/tr|B4DH02|B4DH02_HUMAN/tr|A0A087WYC1|A0A087WYC1_HUMAN/tr|B4DUS3|B4DUS3_HUMAN/tr|B4E354|B4E354_HUMAN/tr|B4DIZ3|B4DIZ3_HUMAN/tr|V9HW33|V9HW33_HUMAN/tr|B4E0H6|B4E0H6_HUMAN		4.14	0		0	2	MASCOT		T
	R20180100087_1,16461	K.NAVEEYVYEM*R.D	1418.63	0.00038	2	1	44.58	0	0.000702	0|0	sp|P34932|HSP74_HUMAN/tr|B4DSE8|B4DSE8_HUMAN/tr|Q59GF8|Q59GF8_HUMAN/tr|B4DT47|B4DT47_HUMAN/tr|B4DH02|B4DH02_HUMAN/tr|A0A087WYC1|A0A087WYC1_HUMAN/tr|B4DUS3|B4DUS3_HUMAN/tr|B4E354|B4E354_HUMAN/tr|B4DIZ3|B4DIZ3_HUMAN/tr|B0AZU6|B0AZU6_HUMAN/tr|B4E0H6|B4E0H6_HUMAN		4.25	0	15.994919 Oxidation (M)	0	2	MASCOT		T
	R20180100087_1,22340	K.NAVEEYVYEMR.D	1402.63	0.00186	2	1	78.61	0	3.87e-07	0|0	sp|P34932|HSP74_HUMAN/tr|B4DSE8|B4DSE8_HUMAN/tr|Q59GF8|Q59GF8_HUMAN/tr|B4DT47|B4DT47_HUMAN/tr|B4DH02|B4DH02_HUMAN/tr|A0A087WYC1|A0A087WYC1_HUMAN/tr|B4DUS3|B4DUS3_HUMAN/tr|B4E354|B4E354_HUMAN/tr|B4DIZ3|B4DIZ3_HUMAN/tr|B0AZU6|B0AZU6_HUMAN/tr|B4E0H6|B4E0H6_HUMAN		4.25	0		0	2	MASCOT		T
	R20180100087_1,22429	K.NAVEEYVYEMR.D	1402.63	-0.00124	3	1	24.07	0	0.402	0|0	sp|P34932|HSP74_HUMAN/tr|B4DSE8|B4DSE8_HUMAN/tr|Q59GF8|Q59GF8_HUMAN/tr|B4DT47|B4DT47_HUMAN/tr|B4DH02|B4DH02_HUMAN/tr|A0A087WYC1|A0A087WYC1_HUMAN/tr|B4DUS3|B4DUS3_HUMAN/tr|B4E354|B4E354_HUMAN/tr|B4DIZ3|B4DIZ3_HUMAN/tr|B0AZU6|B0AZU6_HUMAN/tr|B4E0H6|B4E0H6_HUMAN		4.25	0		0	2	MASCOT		T
	R20180100087_1,7846	K.NKEDQYDHLDAADM*TK.V	1909.82	0.00255	3	1	28.14	0	0.0223	0|0	sp|P34932|HSP74_HUMAN/tr|B0AZT0|B0AZT0_HUMAN/tr|B4DSE8|B4DSE8_HUMAN/tr|Q59GF8|Q59GF8_HUMAN/tr|B4DT47|B4DT47_HUMAN/tr|B0AZS1|B0AZS1_HUMAN/tr|B4DH02|B4DH02_HUMAN/tr|B4DUS3|B4DUS3_HUMAN/tr|B4E354|B4E354_HUMAN/tr|B4DIZ3|B4DIZ3_HUMAN/tr|V9HW33|V9HW33_HUMAN/tr|B0AZU6|B0AZU6_HUMAN/tr|B4E0H6|B4E0H6_HUMAN		4.35	1	15.994919 Oxidation (M)	0	2	MASCOT		T
	R20180100087_1,7862	K.NKEDQYDHLDAADM*TK.V	1909.82	0.0067	2	1	56.3	0	0.000346	0|0	sp|P34932|HSP74_HUMAN/tr|B0AZT0|B0AZT0_HUMAN/tr|B4DSE8|B4DSE8_HUMAN/tr|Q59GF8|Q59GF8_HUMAN/tr|B4DT47|B4DT47_HUMAN/tr|B0AZS1|B0AZS1_HUMAN/tr|B4DH02|B4DH02_HUMAN/tr|B4DUS3|B4DUS3_HUMAN/tr|B4E354|B4E354_HUMAN/tr|B4DIZ3|B4DIZ3_HUMAN/tr|V9HW33|V9HW33_HUMAN/tr|B0AZU6|B0AZU6_HUMAN/tr|B4E0H6|B4E0H6_HUMAN		4.35	1	15.994919 Oxidation (M)	0	2	MASCOT		T
	R20180100087_1,11524	K.NKEDQYDHLDAADMTK.V	1893.83	3e-05	3	1	31.31	0	0.018	0|0	sp|P34932|HSP74_HUMAN/tr|B0AZT0|B0AZT0_HUMAN/tr|B4DSE8|B4DSE8_HUMAN/tr|Q59GF8|Q59GF8_HUMAN/tr|B4DT47|B4DT47_HUMAN/tr|B0AZS1|B0AZS1_HUMAN/tr|B4DH02|B4DH02_HUMAN/tr|B4DUS3|B4DUS3_HUMAN/tr|B4E354|B4E354_HUMAN/tr|B4DIZ3|B4DIZ3_HUMAN/tr|V9HW33|V9HW33_HUMAN/tr|B0AZU6|B0AZU6_HUMAN/tr|B4E0H6|B4E0H6_HUMAN		4.35	1		0	2	MASCOT		T
	R20180100087_1,11535	K.NKEDQYDHLDAADMTK.V	1893.83	-0.00042	2	1	116.6	0	1.15e-10	0|0	sp|P34932|HSP74_HUMAN/tr|B0AZT0|B0AZT0_HUMAN/tr|B4DSE8|B4DSE8_HUMAN/tr|Q59GF8|Q59GF8_HUMAN/tr|B4DT47|B4DT47_HUMAN/tr|B0AZS1|B0AZS1_HUMAN/tr|B4DH02|B4DH02_HUMAN/tr|B4DUS3|B4DUS3_HUMAN/tr|B4E354|B4E354_HUMAN/tr|B4DIZ3|B4DIZ3_HUMAN/tr|V9HW33|V9HW33_HUMAN/tr|B0AZU6|B0AZU6_HUMAN/tr|B4E0H6|B4E0H6_HUMAN		4.35	1		0	2	MASCOT		T
	R20180100087_1,11499	K.QDLPALEEKPR.N	1295.7	-0.00077	2	1	66.45	0	7.79e-05	0|0	sp|P34932|HSP74_HUMAN/tr|Q59GF8|Q59GF8_HUMAN/tr|B4DT47|B4DT47_HUMAN/tr|O14992|O14992_HUMAN/tr|B4DH02|B4DH02_HUMAN/tr|A0A087WYC1|A0A087WYC1_HUMAN/tr|B4DUS3|B4DUS3_HUMAN/tr|A0A087WTS8|A0A087WTS8_HUMAN/tr|B4DIZ3|B4DIZ3_HUMAN/tr|V9HW33|V9HW33_HUMAN/tr|Q7KYN0|Q7KYN0_HUMAN		4.68	0		0	2	MASCOT		T
	R20180100087_1,11661	K.QDLPALEEKPR.N	1295.7	0.00033	3	1	44.5	0	0.00244	0|0	sp|P34932|HSP74_HUMAN/tr|Q59GF8|Q59GF8_HUMAN/tr|B4DT47|B4DT47_HUMAN/tr|O14992|O14992_HUMAN/tr|B4DH02|B4DH02_HUMAN/tr|A0A087WYC1|A0A087WYC1_HUMAN/tr|B4DUS3|B4DUS3_HUMAN/tr|A0A087WTS8|A0A087WTS8_HUMAN/tr|B4DIZ3|B4DIZ3_HUMAN/tr|V9HW33|V9HW33_HUMAN/tr|Q7KYN0|Q7KYN0_HUMAN		4.68	0		0	2	MASCOT		T
	R20180100087_1,4077	K.SEENEEPM*ETDQNAK.E	1766.7	0.00176	2	1	59.79	0	1.39e-05	0|0	sp|P34932|HSP74_HUMAN/tr|Q59GF8|Q59GF8_HUMAN/tr|B4DT47|B4DT47_HUMAN/tr|B4DH02|B4DH02_HUMAN/tr|A0A087WYC1|A0A087WYC1_HUMAN/tr|B4DUS3|B4DUS3_HUMAN/tr|B4E354|B4E354_HUMAN/tr|B4DIZ3|B4DIZ3_HUMAN/tr|V9HW33|V9HW33_HUMAN/tr|B4E0H6|B4E0H6_HUMAN		3.83	0	15.994919 Oxidation (M)	0	2	MASCOT		T
	R20180100087_1,6408	K.SEENEEPMETDQNAKEEEK.M	2265.93	-0.00157	3	1	48.14	0	0.000203	0|0	sp|P34932|HSP74_HUMAN/tr|Q59GF8|Q59GF8_HUMAN/tr|B4DT47|B4DT47_HUMAN/tr|B4DH02|B4DH02_HUMAN/tr|A0A087WYC1|A0A087WYC1_HUMAN/tr|B4DUS3|B4DUS3_HUMAN/tr|B4E354|B4E354_HUMAN/tr|B4DIZ3|B4DIZ3_HUMAN/tr|V9HW33|V9HW33_HUMAN/tr|B4E0H6|B4E0H6_HUMAN		3.93	1		0	2	MASCOT		T
	R20180100087_1,17673	K.STNEAMEWMNNK.L	1454.6	0.00231	2	1	53.9	0	3.71e-05	0|0	sp|P34932|HSP74_HUMAN/tr|B0AZT0|B0AZT0_HUMAN/tr|B4DSE8|B4DSE8_HUMAN/tr|Q59GF8|Q59GF8_HUMAN/tr|B4DT47|B4DT47_HUMAN/tr|B0AZS1|B0AZS1_HUMAN/tr|B4DH02|B4DH02_HUMAN/tr|B4DUS3|B4DUS3_HUMAN/tr|B4E354|B4E354_HUMAN/tr|B4DIZ3|B4DIZ3_HUMAN/tr|V9HW33|V9HW33_HUMAN/tr|B0AZU6|B0AZU6_HUMAN/tr|B4E0H6|B4E0H6_HUMAN/tr|B4DN48|B4DN48_HUMAN		4.53	0		0	2	MASCOT		T
	R20180100087_1,29042	K.TSTVDLPIENQLLWQIDR.E	2141.12	0.00238	2	1	114.76	0	2.38e-10	0|0	sp|P34932|HSP74_HUMAN/tr|B4DSE8|B4DSE8_HUMAN/tr|Q59GF8|Q59GF8_HUMAN/tr|B4DT47|B4DT47_HUMAN/tr|B4DH02|B4DH02_HUMAN/tr|B4DUS3|B4DUS3_HUMAN/tr|B4E354|B4E354_HUMAN/tr|B4DIZ3|B4DIZ3_HUMAN/tr|V9HW33|V9HW33_HUMAN/tr|B0AZU6|B0AZU6_HUMAN/tr|B4E0H6|B4E0H6_HUMAN		4.03	0		0	2	MASCOT		T
	R20180100087_1,29073	K.TSTVDLPIENQLLWQIDR.E	2141.12	-0.00319	3	1	21.29	0	0.512	0|0	sp|P34932|HSP74_HUMAN/tr|B4DSE8|B4DSE8_HUMAN/tr|Q59GF8|Q59GF8_HUMAN/tr|B4DT47|B4DT47_HUMAN/tr|B4DH02|B4DH02_HUMAN/tr|B4DUS3|B4DUS3_HUMAN/tr|B4E354|B4E354_HUMAN/tr|B4DIZ3|B4DIZ3_HUMAN/tr|V9HW33|V9HW33_HUMAN/tr|B0AZU6|B0AZU6_HUMAN/tr|B4E0H6|B4E0H6_HUMAN		4.03	0		0	2	MASCOT		T
	R20180100087_1,4768	R.DKLSGEYEK.F ! R.DKLSGEYEK.I	1068.52	-0.00013	2	1	31.61	0	0.0349	0|0	sp|P34932|HSP74_HUMAN/tr|B4DSE8|B4DSE8_HUMAN/tr|Q59GF8|Q59GF8_HUMAN/tr|B4DT47|B4DT47_HUMAN/tr|B0AZS1|B0AZS1_HUMAN/tr|B4DH02|B4DH02_HUMAN/tr|A0A087WYC1|A0A087WYC1_HUMAN/tr|B4DUS3|B4DUS3_HUMAN/tr|B4E354|B4E354_HUMAN/tr|V9HW33|V9HW33_HUMAN/tr|B0AZU6|B0AZU6_HUMAN/tr|B4E0H6|B4E0H6_HUMAN ! tr|B4DIZ3|B4DIZ3_HUMAN		4.68	1		0	2	MASCOT		T
	R20180100087_1,29181	R.EFSITDVVPYPISLR.W	1735.93	0.00217	2	1	56.99	0	0.000149	0|0	sp|P34932|HSP74_HUMAN/tr|Q59GF8|Q59GF8_HUMAN/tr|B4DT47|B4DT47_HUMAN/tr|O14992|O14992_HUMAN/tr|B4DH02|B4DH02_HUMAN/tr|A0A087WYC1|A0A087WYC1_HUMAN/tr|B4DUS3|B4DUS3_HUMAN/tr|A0A087WTS8|A0A087WTS8_HUMAN/tr|B4E354|B4E354_HUMAN/tr|B4DIZ3|B4DIZ3_HUMAN/tr|V9HW33|V9HW33_HUMAN/tr|B4E0H6|B4E0H6_HUMAN		4.37	0		0	2	MASCOT		T
	R20180100087_1,22235	R.EMLNLYIENEGK.M	1452.7	0.00011	2	1	50.05	0	0.00061	0|0	sp|P34932|HSP74_HUMAN/tr|B4DSE8|B4DSE8_HUMAN/tr|Q59GF8|Q59GF8_HUMAN/tr|B4DT47|B4DT47_HUMAN/tr|B4DH02|B4DH02_HUMAN/tr|A0A087WYC1|A0A087WYC1_HUMAN/tr|B4DUS3|B4DUS3_HUMAN/tr|B4E354|B4E354_HUMAN/tr|B4DIZ3|B4DIZ3_HUMAN/tr|V9HW33|V9HW33_HUMAN/tr|B0AZU6|B0AZU6_HUMAN/tr|B4E0H6|B4E0H6_HUMAN		4.25	0		0	2	MASCOT		T
	R20180100087_1,3919	R.FQESEERPK.L	1149.55	-0.00074	2	1	46.73	0	0.00167	0|0	sp|P34932|HSP74_HUMAN/tr|Q59GF8|Q59GF8_HUMAN/tr|B4DT47|B4DT47_HUMAN/tr|B0AZS1|B0AZS1_HUMAN/tr|B4DH02|B4DH02_HUMAN/tr|B4DUS3|B4DUS3_HUMAN/tr|B4E354|B4E354_HUMAN/tr|B4DIZ3|B4DIZ3_HUMAN/tr|V9HW33|V9HW33_HUMAN/tr|B0AZU6|B0AZU6_HUMAN/tr|B4E0H6|B4E0H6_HUMAN		4.79	0		0	2	MASCOT		T
	R20180100087_1,3922	R.FQESEERPK.L	1149.55	-0.00063	3	1	40.83	0	0.00651	0|0	sp|P34932|HSP74_HUMAN/tr|Q59GF8|Q59GF8_HUMAN/tr|B4DT47|B4DT47_HUMAN/tr|B0AZS1|B0AZS1_HUMAN/tr|B4DH02|B4DH02_HUMAN/tr|B4DUS3|B4DUS3_HUMAN/tr|B4E354|B4E354_HUMAN/tr|B4DIZ3|B4DIZ3_HUMAN/tr|V9HW33|V9HW33_HUMAN/tr|B0AZU6|B0AZU6_HUMAN/tr|B4E0H6|B4E0H6_HUMAN		4.79	0		0	2	MASCOT		T
	R20180100087_1,24055	R.KFDEVLVNHFCEEFGK.K	1997.94	-0.00028	3	1	28.18	0	0.0855	0|0	sp|P34932|HSP74_HUMAN/tr|Q59GF8|Q59GF8_HUMAN/tr|B4DT47|B4DT47_HUMAN/tr|O14992|O14992_HUMAN/tr|B4DH02|B4DH02_HUMAN/tr|A0A087WYC1|A0A087WYC1_HUMAN/tr|B4DUS3|B4DUS3_HUMAN/tr|A0A087WTS8|A0A087WTS8_HUMAN/tr|B4E354|B4E354_HUMAN/tr|B4DIZ3|B4DIZ3_HUMAN/tr|V9HW33|V9HW33_HUMAN/tr|Q7KYN0|Q7KYN0_HUMAN		4.83	1		0	2	MASCOT		T
	R20180100087_1,23095	R.VNVHGIFSVSSASLVEVHK.S	2009.08	-0.0036	3	1	53.53	0	0.000276	0|0	sp|P34932|HSP74_HUMAN/tr|Q59GF8|Q59GF8_HUMAN/tr|B4DT47|B4DT47_HUMAN/tr|B4DH02|B4DH02_HUMAN/tr|A0A087WYC1|A0A087WYC1_HUMAN/tr|B4DUS3|B4DUS3_HUMAN/tr|B4E354|B4E354_HUMAN/tr|B4DIZ3|B4DIZ3_HUMAN/tr|V9HW33|V9HW33_HUMAN/tr|B4E0H6|B4E0H6_HUMAN		6.89	0		0	2	MASCOT		T
	R20180100087_1,16396	R.WNSPAEEGSSDCEVFSK.N	1928.8	-0.00403	2	1	97.88	0	2.82e-09	0|0	sp|P34932|HSP74_HUMAN/tr|Q59GF8|Q59GF8_HUMAN/tr|B4DT47|B4DT47_HUMAN/tr|O14992|O14992_HUMAN/tr|B4DH02|B4DH02_HUMAN/tr|A0A087WYC1|A0A087WYC1_HUMAN/tr|B4DUS3|B4DUS3_HUMAN/tr|A0A087WTS8|A0A087WTS8_HUMAN/tr|B4E354|B4E354_HUMAN/tr|B4DIZ3|B4DIZ3_HUMAN/tr|V9HW33|V9HW33_HUMAN/tr|B4E0H6|B4E0H6_HUMAN		4	0		0	2	MASCOT		T
$25-1	sp|P49321|NASP_HUMAN Nuclear autoantigenic sperm protein OS=Homo sapiens GN=NASP PE=1 SV=2	33	25	0.4226	85236.7	4.26
$25-2	tr|Q53H03|Q53H03_HUMAN Nuclear autoantigenic sperm protein isoform 2 variant (Fragment) OS=Homo sapiens PE=2 SV=1	33	25	0.4226	85234.8	4.26
	R20180100087_1,19184	K.DGAVNGPSVVGDQTPIEPQTSIER.L	2466.21	-0.00044	3	1	38.07	0	0.0101	0|0	sp|P49321|NASP_HUMAN/tr|Q6PJY7|Q6PJY7_HUMAN/tr|Q53H03|Q53H03_HUMAN/tr|B4DS57|B4DS57_HUMAN		3.92	0		0	2	MASCOT		T
	R20180100087_1,19845	K.DGAVNGPSVVGDQTPIEPQTSIER.L	2466.21	0.00286	2	1	40.46	0	0.00592	0|0	sp|P49321|NASP_HUMAN/tr|Q6PJY7|Q6PJY7_HUMAN/tr|Q53H03|Q53H03_HUMAN/tr|B4DS57|B4DS57_HUMAN		3.92	0		0	2	MASCOT		T
	R20180100087_1,11565	K.EAQLYAAQAHLK.L	1342.71	-0.00035	2	1	59.69	0	9.09e-05	0|0	sp|P49321|NASP_HUMAN/tr|Q9P1N1|Q9P1N1_HUMAN/tr|Q53H03|Q53H03_HUMAN/tr|B4DS57|B4DS57_HUMAN/tr|Q5T626|Q5T626_HUMAN/tr|E9PI86|E9PI86_HUMAN/tr|Q5T624|Q5T624_HUMAN/tr|O95138|O95138_HUMAN/tr|E9PRH9|E9PRH9_HUMAN/tr|H0YF33|H0YF33_HUMAN		6.85	0		0	2	MASCOT		T
	R20180100087_1,11566	K.EAQLYAAQAHLK.L	1342.71	-0.00042	3	1	26.28	0	0.197	0|0	sp|P49321|NASP_HUMAN/tr|Q9P1N1|Q9P1N1_HUMAN/tr|Q53H03|Q53H03_HUMAN/tr|B4DS57|B4DS57_HUMAN/tr|Q5T626|Q5T626_HUMAN/tr|E9PI86|E9PI86_HUMAN/tr|Q5T624|Q5T624_HUMAN/tr|O95138|O95138_HUMAN/tr|E9PRH9|E9PRH9_HUMAN/tr|H0YF33|H0YF33_HUMAN		6.85	0		0	2	MASCOT		T
	R20180100087_1,27361	K.EIEELKELLPEIR.E	1610.9	-0.00051	3	1	56.82	0	0.000101	0|0	sp|P49321|NASP_HUMAN/tr|Q9P1N1|Q9P1N1_HUMAN/tr|Q53H03|Q53H03_HUMAN/tr|B4DS57|B4DS57_HUMAN/tr|H0YDS9|H0YDS9_HUMAN/tr|Q5T626|Q5T626_HUMAN/tr|Q5T624|Q5T624_HUMAN/tr|E9PRH9|E9PRH9_HUMAN/tr|H0YF33|H0YF33_HUMAN		4.33	1		0	2	MASCOT		T
	R20180100087_1,27364	K.EIEELKELLPEIR.E	1610.9	-0.00306	2	1	73.82	0	2.02e-06	0|0	sp|P49321|NASP_HUMAN/tr|Q9P1N1|Q9P1N1_HUMAN/tr|Q53H03|Q53H03_HUMAN/tr|B4DS57|B4DS57_HUMAN/tr|H0YDS9|H0YDS9_HUMAN/tr|Q5T626|Q5T626_HUMAN/tr|Q5T624|Q5T624_HUMAN/tr|E9PRH9|E9PRH9_HUMAN/tr|H0YF33|H0YF33_HUMAN		4.33	1		0	2	MASCOT		T
	R20180100087_1,18425	K.ELLPEIR.E	869.509	0.00014	2	1	34.37	0	0.0278	0|0	sp|P49321|NASP_HUMAN/tr|Q9P1N1|Q9P1N1_HUMAN/tr|Q53H03|Q53H03_HUMAN/tr|B4DS57|B4DS57_HUMAN/tr|H0YDS9|H0YDS9_HUMAN/tr|Q5T626|Q5T626_HUMAN/tr|Q5T624|Q5T624_HUMAN/tr|E9PRH9|E9PRH9_HUMAN/tr|H0YF33|H0YF33_HUMAN		4.53	0		0	2	MASCOT		T
	R20180100087_1,14689	K.EVSEEQPVVTLEK.Q	1486.76	0.00187	2	1	58.46	0	0.000322	0|0	sp|P49321|NASP_HUMAN/tr|Q6PJY7|Q6PJY7_HUMAN/tr|Q53H03|Q53H03_HUMAN/tr|B4DS57|B4DS57_HUMAN/tr|E9PPR5|E9PPR5_HUMAN		4.09	0		0	2	MASCOT		T
	R20180100087_1,29961	K.HLVM*GDIPAAVNAFQEAASLLGK.K	2368.23	0.0004	2	1	59.23	0	0.000271	0|0	sp|P49321|NASP_HUMAN/tr|Q6PJY7|Q6PJY7_HUMAN/tr|E9PPQ8|E9PPQ8_HUMAN/tr|Q53H03|Q53H03_HUMAN/tr|Q5T626|Q5T626_HUMAN/tr|E9PI86|E9PI86_HUMAN/tr|O95138|O95138_HUMAN		5.32	0	15.994919 Oxidation (M)	0	2	MASCOT		T
	R20180100087_1,30792	K.HLVMGDIPAAVNAFQEAASLLGK.K	2352.24	-0.00167	3	1	92.72	0	3.35e-08	0|0	sp|P49321|NASP_HUMAN/tr|Q6PJY7|Q6PJY7_HUMAN/tr|E9PPQ8|E9PPQ8_HUMAN/tr|Q53H03|Q53H03_HUMAN/tr|Q5T626|Q5T626_HUMAN/tr|E9PI86|E9PI86_HUMAN/tr|O95138|O95138_HUMAN		5.32	0		0	2	MASCOT		T
	R20180100087_1,13124	K.LLGLGQK.H	728.466	0.00016	2	1	41.06	0	0.00452	0|0	sp|P49321|NASP_HUMAN/tr|Q6PJY7|Q6PJY7_HUMAN/tr|E9PPQ8|E9PPQ8_HUMAN/tr|Q53H03|Q53H03_HUMAN/tr|Q5T626|Q5T626_HUMAN/tr|E9PI86|E9PI86_HUMAN/tr|Q5T624|Q5T624_HUMAN/tr|O95138|O95138_HUMAN		8.75	0		0	2	MASCOT		T
	R20180100087_1,12034	K.LSVEESEAAGDGVDTK.V	1606.74	-0.00288	2	1	68.51	0	6.21e-06	0|0	sp|P49321|NASP_HUMAN/tr|Q6PJY7|Q6PJY7_HUMAN/tr|Q53H03|Q53H03_HUMAN/tr|B4DS57|B4DS57_HUMAN		3.83	0		0	2	MASCOT		T
	R20180100087_1,4774	K.LVPSQEETK.L	1030.54	-0.00128	2	1	38.93	0	0.0109	0|0	sp|P49321|NASP_HUMAN/tr|Q6PJY7|Q6PJY7_HUMAN/tr|Q53H03|Q53H03_HUMAN/tr|B4DS57|B4DS57_HUMAN		4.53	0		0	2	MASCOT		T
	R20180100087_1,13307	K.QGEVIVSIEEKPK.E	1455.81	0.00265	2	1	80.38	0	5.67e-07	0|0	sp|P49321|NASP_HUMAN/tr|Q6PJY7|Q6PJY7_HUMAN/tr|Q53H03|Q53H03_HUMAN/tr|B4DS57|B4DS57_HUMAN/tr|E9PPR5|E9PPR5_HUMAN		4.79	0		0	2	MASCOT		T
	R20180100087_1,10419	K.SIEVIENR.M	959.516	0.00104	2	1	46.52	0	0.00232	0|0	sp|P49321|NASP_HUMAN/tr|Q9P1N1|Q9P1N1_HUMAN/tr|Q53H03|Q53H03_HUMAN/tr|B4DS57|B4DS57_HUMAN/tr|H0YDS9|H0YDS9_HUMAN/tr|Q5T626|Q5T626_HUMAN/tr|Q5T624|Q5T624_HUMAN/tr|O95138|O95138_HUMAN/tr|E9PRH9|E9PRH9_HUMAN/tr|H0YF33|H0YF33_HUMAN		4.53	0		0	2	MASCOT		T
	R20180100087_1,3991	K.SLAKPETDKEQDSEM*EK.G	1980.91	-0.00568	3	1	28.07	0	0.0741	0|0	sp|P49321|NASP_HUMAN/tr|Q6PJY7|Q6PJY7_HUMAN/tr|Q53H03|Q53H03_HUMAN/tr|B4DS57|B4DS57_HUMAN/tr|E9PPR5|E9PPR5_HUMAN/tr|E9PNB5|E9PNB5_HUMAN		4.36	1	15.994919 Oxidation (M)	0	2	MASCOT		T
	R20180100087_1,5772	K.SLAKPETDKEQDSEMEK.G	1964.91	0.00023	3	1	48.32	0	0.00107	0|0	sp|P49321|NASP_HUMAN/tr|Q6PJY7|Q6PJY7_HUMAN/tr|Q53H03|Q53H03_HUMAN/tr|B4DS57|B4DS57_HUMAN/tr|E9PPR5|E9PPR5_HUMAN/tr|E9PNB5|E9PNB5_HUMAN		4.36	1		0	2	MASCOT		T
	R20180100087_1,5804	K.SLAKPETDKEQDSEMEK.G	1964.91	-0.00165	4	1	34.74	0	0.0245	0|0	sp|P49321|NASP_HUMAN/tr|Q6PJY7|Q6PJY7_HUMAN/tr|Q53H03|Q53H03_HUMAN/tr|B4DS57|B4DS57_HUMAN/tr|E9PPR5|E9PPR5_HUMAN/tr|E9PNB5|E9PNB5_HUMAN		4.36	1		0	2	MASCOT		T
	R20180100087_1,31595	K.SLQENEEEEIGNLELAWDMLDLAK.I	2789.32	0.00082	3	1	103.89	0	2.56e-09	0|0	sp|P49321|NASP_HUMAN/tr|Q9P1N1|Q9P1N1_HUMAN/tr|Q53H03|Q53H03_HUMAN/tr|B4DS57|B4DS57_HUMAN/tr|Q5T626|Q5T626_HUMAN/tr|E9PI86|E9PI86_HUMAN/tr|Q5T624|Q5T624_HUMAN/tr|O95138|O95138_HUMAN/tr|E9PRH9|E9PRH9_HUMAN/tr|H0YF33|H0YF33_HUMAN		3.67	0		0	2	MASCOT		T
	R20180100087_1,31597	K.SLQENEEEEIGNLELAWDMLDLAK.I	2789.32	0.00291	2	1	88.86	0	8.12e-08	0|0	sp|P49321|NASP_HUMAN/tr|Q9P1N1|Q9P1N1_HUMAN/tr|Q53H03|Q53H03_HUMAN/tr|B4DS57|B4DS57_HUMAN/tr|Q5T626|Q5T626_HUMAN/tr|E9PI86|E9PI86_HUMAN/tr|Q5T624|Q5T624_HUMAN/tr|O95138|O95138_HUMAN/tr|E9PRH9|E9PRH9_HUMAN/tr|H0YF33|H0YF33_HUMAN		3.67	0		0	2	MASCOT		T
	R20180100087_1,5786	K.SVSGTDVQEECR.E	1366.59	0.0026	2	1	72.87	0	2.57e-06	0|0	sp|P49321|NASP_HUMAN/tr|Q6PJY7|Q6PJY7_HUMAN/tr|Q53H03|Q53H03_HUMAN/tr|B4DS57|B4DS57_HUMAN/tr|E9PPR5|E9PPR5_HUMAN		4.14	0		0	2	MASCOT		T
	R20180100087_1,13965	K.TEEMPNDSVLENK.S	1505.68	0.0016	2	1	34.8	0	0.00944	0|0	sp|P49321|NASP_HUMAN/tr|Q9P1N1|Q9P1N1_HUMAN/tr|E9PPQ8|E9PPQ8_HUMAN/tr|Q53H03|Q53H03_HUMAN/tr|B4DS57|B4DS57_HUMAN/tr|Q5T626|Q5T626_HUMAN/tr|E9PI86|E9PI86_HUMAN/tr|Q5T624|Q5T624_HUMAN/tr|O95138|O95138_HUMAN/tr|E9PRH9|E9PRH9_HUMAN/tr|H0YF33|H0YF33_HUMAN		4	0		0	2	MASCOT		T
	R20180100087_1,9996	K.VESLDVDSEAK.K	1191.57	0.00084	2	1	46.47	0	0.00137	0|0	sp|P49321|NASP_HUMAN/tr|Q6PJY7|Q6PJY7_HUMAN/tr|Q53H03|Q53H03_HUMAN/tr|Q5T626|Q5T626_HUMAN/tr|E9PI86|E9PI86_HUMAN/tr|Q5T624|Q5T624_HUMAN/tr|O95138|O95138_HUMAN		3.92	0		0	2	MASCOT		T
	R20180100087_1,8000	K.VQIAANEETQER.E	1387.68	-0.0017	2	1	35.7	0	0.0154	0|0	sp|P49321|NASP_HUMAN/tr|Q6PJY7|Q6PJY7_HUMAN/tr|Q53H03|Q53H03_HUMAN/tr|B4DS57|B4DS57_HUMAN		4.25	0		0	2	MASCOT		T
	R20180100087_1,2945	K.VVTSENEAGK.A	1033.52	0	2	1	55.35	0	0.000256	0|0	sp|P49321|NASP_HUMAN/tr|Q6PJY7|Q6PJY7_HUMAN/tr|Q53H03|Q53H03_HUMAN/tr|B4DS57|B4DS57_HUMAN/tr|E9PPR5|E9PPR5_HUMAN		4.53	0		0	2	MASCOT		T
	R20180100087_1,26328	K.YGETANECGEAFFFYGK.S	1989.83	0.00042	2	1	45.75	0	0.000812	0|0	sp|P49321|NASP_HUMAN/tr|Q6PJY7|Q6PJY7_HUMAN/tr|E9PPQ8|E9PPQ8_HUMAN/tr|Q53H03|Q53H03_HUMAN/tr|E9PPR5|E9PPR5_HUMAN/tr|Q5T626|Q5T626_HUMAN/tr|E9PI86|E9PI86_HUMAN/tr|O95138|O95138_HUMAN		4.25	0		0	2	MASCOT		T
	R20180100087_1,5852	R.EDMDISK.S	837.366	6e-05	2	1	39.78	0	0.00294	0|0	sp|P49321|NASP_HUMAN/tr|Q6PJY7|Q6PJY7_HUMAN/tr|Q53H03|Q53H03_HUMAN/tr|B4DS57|B4DS57_HUMAN/tr|E9PPR5|E9PPR5_HUMAN/tr|E9PNB5|E9PNB5_HUMAN		4.03	0		0	2	MASCOT		T
	R20180100087_1,5429	R.EQVYDAM*GEKEEAK.K	1642.73	-0.00293	2	1	61.9	0	3.14e-05	0|0	sp|P49321|NASP_HUMAN/tr|Q6PJY7|Q6PJY7_HUMAN/tr|Q53H03|Q53H03_HUMAN/tr|B4DS57|B4DS57_HUMAN/tr|E9PPR5|E9PPR5_HUMAN/tr|E9PNB5|E9PNB5_HUMAN		4.25	1	15.994919 Oxidation (M)	0	2	MASCOT		T
	R20180100087_1,10069	R.EQVYDAMGEK.E	1169.51	0.00277	2	1	32.36	0	0.0296	0|0	sp|P49321|NASP_HUMAN/tr|Q6PJY7|Q6PJY7_HUMAN/tr|Q53H03|Q53H03_HUMAN/tr|B4DS57|B4DS57_HUMAN/tr|E9PPR5|E9PPR5_HUMAN/tr|E9PNB5|E9PNB5_HUMAN		4.14	0		0	2	MASCOT		T
	R20180100087_1,9231	R.EQVYDAMGEKEEAK.K	1626.73	-0.00011	3	1	27.08	0	0.0597	0|0	sp|P49321|NASP_HUMAN/tr|Q6PJY7|Q6PJY7_HUMAN/tr|Q53H03|Q53H03_HUMAN/tr|B4DS57|B4DS57_HUMAN/tr|E9PPR5|E9PPR5_HUMAN/tr|E9PNB5|E9PNB5_HUMAN		4.25	1		0	2	MASCOT		T
	R20180100087_1,16695	R.KPTDGASSSNCVTDISHLVR.K	2144.04	-0.00158	4	1	67.42	0	1.28e-05	0|0	sp|P49321|NASP_HUMAN/tr|Q9P1N1|Q9P1N1_HUMAN/tr|Q53H03|Q53H03_HUMAN/tr|B4DS57|B4DS57_HUMAN/tr|H0YDS9|H0YDS9_HUMAN/tr|Q5T626|Q5T626_HUMAN/tr|Q5T624|Q5T624_HUMAN		6.74	0		0	2	MASCOT		T
	R20180100087_1,27096	R.LLAETHYQLGLAYGYNSQYDEAVAQFSK.S	3179.53	-0.00267	3	1	106.77	0	1.11e-09	0|0	sp|P49321|NASP_HUMAN/tr|Q9P1N1|Q9P1N1_HUMAN/tr|Q53H03|Q53H03_HUMAN/tr|B4DS57|B4DS57_HUMAN/tr|H0YDS9|H0YDS9_HUMAN/tr|Q5T626|Q5T626_HUMAN/tr|Q5T624|Q5T624_HUMAN/tr|O95138|O95138_HUMAN/tr|E9PRH9|E9PRH9_HUMAN/tr|H0YF33|H0YF33_HUMAN		4.65	0		0	2	MASCOT		T
	R20180100087_1,14557	R.SGNVAELALK.A ! R.SGNVAELALK.-	1001.56	4e-05	2	1	90.11	0	1.7e-07	0|0	sp|P49321|NASP_HUMAN/tr|Q9P1N1|Q9P1N1_HUMAN/tr|Q53H03|Q53H03_HUMAN/tr|B4DS57|B4DS57_HUMAN/tr|H0YDS9|H0YDS9_HUMAN/tr|Q5T626|Q5T626_HUMAN/tr|Q5T624|Q5T624_HUMAN/tr|H0YF33|H0YF33_HUMAN ! tr|E9PRH9|E9PRH9_HUMAN		5.72	0		0	2	MASCOT		T
$26-1	sp|P11021|GRP78_HUMAN 78 kDa glucose-regulated protein OS=Homo sapiens GN=HSPA5 PE=1 SV=2	33	24	0.4037	72332.1	5.07
$26-2	tr|V9HWB4|V9HWB4_HUMAN Epididymis secretory sperm binding protein Li 89n OS=Homo sapiens GN=HEL-S-89n PE=2 SV=1	33	24	0.4037	72332.1	5.07
	R20180100087_1,15547	K.DAGTIAGLNVM*R.I	1233.63	-0.00453	2	1	25.8	0	0.799	0|0	sp|P11021|GRP78_HUMAN/tr|V9HWB4|V9HWB4_HUMAN/tr|B4DEF7|B4DEF7_HUMAN		5.84	0	15.994919 Oxidation (M)	0	2	MASCOT		T
	R20180100087_1,20516	K.DAGTIAGLNVMR.I	1217.63	-0.00237	3	1	32.89	0	0.0646	0|0	sp|P11021|GRP78_HUMAN/tr|V9HWB4|V9HWB4_HUMAN/tr|B4DEF7|B4DEF7_HUMAN		5.84	0		0	2	MASCOT		T
	R20180100087_1,26974	K.DNHLLGTFDLTGIPPAPR.G	1934.01	-0.00058	2	1	87.15	0	2.22e-07	0|0	sp|P11021|GRP78_HUMAN/tr|V9HWB4|V9HWB4_HUMAN		5.21	0		0	2	MASCOT		T
	R20180100087_1,27513	K.DNHLLGTFDLTGIPPAPR.G	1934.01	0.001	3	1	47.08	0	0.00228	0|0	sp|P11021|GRP78_HUMAN/tr|V9HWB4|V9HWB4_HUMAN		5.21	0		0	2	MASCOT		T
	R20180100087_1,23142	K.ELEEIVQPIISK.L	1397.79	0.00036	2	1	54.54	0	0.000174	0|0	sp|P11021|GRP78_HUMAN/tr|V9HWB4|V9HWB4_HUMAN		4.25	0		0	2	MASCOT		T
	R20180100087_1,10583	K.ETAEAYLGK.K	981.489	0.00256	2	1	26.59	0	0.13	0|0	sp|P11021|GRP78_HUMAN/tr|V9HWB4|V9HWB4_HUMAN/tr|B4DEF7|B4DEF7_HUMAN		4.53	0		0	2	MASCOT		T
	R20180100087_1,27600	K.FEELNMDLFR.S	1313.62	0	2	1	65.32	0	1.37e-05	0|0	sp|P11021|GRP78_HUMAN/tr|V9HWB4|V9HWB4_HUMAN		4.14	0		0	2	MASCOT		T
	R20180100087_1,23483	K.IEWLESHQDADIEDFK.A	1974.91	-0.00092	3	1	48.53	0	0.000546	0|0	sp|P11021|GRP78_HUMAN/tr|V9HWB4|V9HWB4_HUMAN		4.01	0		0	2	MASCOT		T
	R20180100087_1,6829	K.IQQLVK.E	728.466	-0.00016	2	1	36.06	0	0.0143	0|0	sp|P11021|GRP78_HUMAN/tr|V9HWB4|V9HWB4_HUMAN		8.75	0		0	2	MASCOT		T
	R20180100087_1,6474	K.ITITNDQNR.L	1074.55	0.00012	2	1	56.93	0	0.000204	0|0	sp|P11021|GRP78_HUMAN/tr|V9HWB4|V9HWB4_HUMAN		5.84	0		0	2	MASCOT		T
	R20180100087_1,19288	K.KSDIDEIVLVGGSTR.I	1588.85	-0.00133	2	1	87.32	0	1.74e-07	0|0	sp|P11021|GRP78_HUMAN/tr|V9HWB4|V9HWB4_HUMAN		4.56	1		0	2	MASCOT		T
	R20180100087_1,3906	K.LSSEDKETMEK.A	1296.6	-0.00133	2	1	59.91	0	7.36e-05	0|0	sp|P11021|GRP78_HUMAN/tr|V9HWB4|V9HWB4_HUMAN		4.41	1		0	2	MASCOT		T
	R20180100087_1,22653	K.SDIDEIVLVGGSTR.I	1460.76	-0.00216	2	1	79.76	0	1.02e-06	0|0	sp|P11021|GRP78_HUMAN/tr|V9HWB4|V9HWB4_HUMAN		4.03	0		0	2	MASCOT		T
	R20180100087_1,22714	K.SDIDEIVLVGGSTR.I	1460.76	7e-05	3	1	34.33	0	0.0342	0|0	sp|P11021|GRP78_HUMAN/tr|V9HWB4|V9HWB4_HUMAN		4.03	0		0	2	MASCOT		T
	R20180100087_1,18268	K.SQIFSTASDNQPTVTIK.V	1836.93	-0.00127	2	1	93.15	0	1.11e-07	0|0	sp|P11021|GRP78_HUMAN/tr|V9HWB4|V9HWB4_HUMAN		5.55	0		0	2	MASCOT		T
	R20180100087_1,18312	K.SQIFSTASDNQPTVTIK.V	1836.93	-0.00114	3	1	28.01	0	0.365	0|0	sp|P11021|GRP78_HUMAN/tr|V9HWB4|V9HWB4_HUMAN		5.55	0		0	2	MASCOT		T
	R20180100087_1,14862	K.TKPYIQVDIGGGQTK.T	1604.86	0.00151	2	1	68.16	0	2.23e-05	0|0	sp|P11021|GRP78_HUMAN/tr|V9HWB4|V9HWB4_HUMAN/tr|B4DEF7|B4DEF7_HUMAN		8.17	0		0	2	MASCOT		T
	R20180100087_1,5759	K.VLEDSDLKK.S	1046.57	-0.00073	3	1	43.05	0	0.00484	0|0	sp|P11021|GRP78_HUMAN/tr|V9HWB4|V9HWB4_HUMAN		4.56	1		0	2	MASCOT		T
	R20180100087_1,19475	K.VTHAVVTVPAYFNDAQR.Q	1887.97	-0.00136	3	1	54.62	0	0.000266	0|0	sp|P11021|GRP78_HUMAN/tr|V9HWB4|V9HWB4_HUMAN/tr|B4DEF7|B4DEF7_HUMAN		6.71	0		0	2	MASCOT		T
	R20180100087_1,6241	K.VYEGERPLTK.D	1191.64	7e-05	3	1	26.33	0	0.199	0|0	sp|P11021|GRP78_HUMAN/tr|V9HWB4|V9HWB4_HUMAN		6.11	0		0	2	MASCOT		T
	R20180100087_1,26212	R.AKFEELNMDLFR.S	1512.75	-0.00053	3	1	48.12	0	0.00107	0|0	sp|P11021|GRP78_HUMAN/tr|V9HWB4|V9HWB4_HUMAN		4.68	1		0	2	MASCOT		T
	R20180100087_1,24625	R.IINEPTAAAIAYGLDK.R ! R.IINEPTAAAIAYGLDK.G ! R.IINEPTAAAIAYGLDK.K ! R.IINEPTAAAIAYGLDK.-	1659.9	-0.00047	2	1	99.77	0	8.11e-09	0|0	sp|P11021|GRP78_HUMAN/tr|V9HWB4|V9HWB4_HUMAN/tr|B4DEF7|B4DEF7_HUMAN ! sp|P34931|HS71L_HUMAN/tr|B4DI54|B4DI54_HUMAN/tr|Q53FA3|Q53FA3_HUMAN/tr|B2RCQ9|B2RCQ9_HUMAN/tr|A0A1U9X7X4|A0A1U9X7X4_HUMAN/tr|A0A1U9X7X9|A0A1U9X7X9_HUMAN/tr|A0A1U9X7W7|A0A1U9X7W7_HUMAN/tr|B4DXY3|B4DXY3_HUMAN ! sp|P54652|HSP72_HUMAN/sp|P11142|HSP7C_HUMAN/tr|V9HW22|V9HW22_HUMAN/tr|E9PKE3|E9PKE3_HUMAN/tr|B3KTV0|B3KTV0_HUMAN/tr|Q53H…		4.37	0		0	2	MASCOT		T
	R20180100087_1,25266	R.IINEPTAAAIAYGLDK.R ! R.IINEPTAAAIAYGLDK.G ! R.IINEPTAAAIAYGLDK.K ! R.IINEPTAAAIAYGLDK.-	1659.9	-0.00415	2	1	82.34	0	1.47e-06	0|0	sp|P11021|GRP78_HUMAN/tr|V9HWB4|V9HWB4_HUMAN/tr|B4DEF7|B4DEF7_HUMAN ! sp|P34931|HS71L_HUMAN/tr|B4DI54|B4DI54_HUMAN/tr|Q53FA3|Q53FA3_HUMAN/tr|B2RCQ9|B2RCQ9_HUMAN/tr|A0A1U9X7X4|A0A1U9X7X4_HUMAN/tr|A0A1U9X7X9|A0A1U9X7X9_HUMAN/tr|A0A1U9X7W7|A0A1U9X7W7_HUMAN/tr|B4DXY3|B4DXY3_HUMAN ! sp|P54652|HSP72_HUMAN/sp|P11142|HSP7C_HUMAN/tr|V9HW22|V9HW22_HUMAN/tr|E9PKE3|E9PKE3_HUMAN/tr|B3KTV0|B3KTV0_HUMAN/tr|Q53H…		4.37	0		0	2	MASCOT		T
	R20180100087_1,19647	R.ITPSYVAFTPEGER.L	1566.78	-0.00468	2	1	74.27	0	3.56e-06	0|0	sp|P11021|GRP78_HUMAN/tr|V9HWB4|V9HWB4_HUMAN/tr|B4DEF7|B4DEF7_HUMAN		4.53	0		0	2	MASCOT		T
	R20180100087_1,19690	R.ITPSYVAFTPEGER.L	1566.78	-0.00778	3	1	37.15	0	0.0189	0|0	sp|P11021|GRP78_HUMAN/tr|V9HWB4|V9HWB4_HUMAN/tr|B4DEF7|B4DEF7_HUMAN		4.53	0		0	2	MASCOT		T
	R20180100087_1,4465	R.LIGDAAK.N	687.404	-0.00022	2	1	35.46	0	0.0599	0|0	sp|P11021|GRP78_HUMAN/sp|P34931|HS71L_HUMAN/sp|P54652|HSP72_HUMAN/sp|P0DMV8|HS71A_HUMAN/sp|P0DMV9|HS71B_HUMAN/sp|P11142|HSP7C_HUMAN/tr|A0A0G2JIW1|A0A0G2JIW1_HUMAN/tr|V9HWB4|V9HWB4_HUMAN/tr|B4DNT8|B4DNT8_HUMAN/tr|B4DI54|B4DI54_HUMAN/tr|Q53FA3|Q53FA3_HUMAN/tr|V9HW22|V9HW22_HUMAN/tr|Q53GZ6|Q53GZ6_HUMAN/tr|B3KUS2|B3KUS2_HUMAN/tr|E9PKE3|E9PKE3_HUMAN/tr|B4DI39|B4DI39_HUMAN/tr|B2RCQ9|B2RCQ9_HUMAN/tr|B4D…		5.84	0		0	2	MASCOT		T
	R20180100087_1,20483	R.NELESYAYSLK.N	1316.64	-4e-05	2	1	44.65	0	0.00199	0|0	sp|P11021|GRP78_HUMAN/tr|V9HWB4|V9HWB4_HUMAN		4.53	0		0	2	MASCOT		T
	R20180100087_1,14825	R.TWNDPSVQQDIK.F	1430.69	0.00187	2	1	56.98	0	0.000128	0|0	sp|P11021|GRP78_HUMAN/tr|V9HWB4|V9HWB4_HUMAN/tr|B4DEF7|B4DEF7_HUMAN		4.21	0		0	2	MASCOT		T
	R20180100087_1,8739	R.VEIIANDQGNR.I ! K.VEIIANDQGNR.T ! R.VEILANDQGNR.T	1228.63	-0.00032	2	1	40.87	0	0.00636	0|0	sp|P11021|GRP78_HUMAN/tr|V9HWB4|V9HWB4_HUMAN/tr|B4DEF7|B4DEF7_HUMAN ! sp|P34931|HS71L_HUMAN/sp|P54652|HSP72_HUMAN/sp|P0DMV8|HS71A_HUMAN/sp|P0DMV9|HS71B_HUMAN/sp|P11142|HSP7C_HUMAN/tr|A0A0G2JIW1|A0A0G2JIW1_HUMAN/tr|B4DVU9|B4DVU9_HUMAN/tr|B4DI54|B4DI54_HUMAN/tr|Q53FA3|Q53FA3_HUMAN/tr|V9HW22|V9HW22_HUMAN/tr|Q53GZ6|Q53GZ6_HUMAN/tr|B3KUS2|B3KUS2_HUMAN/tr|E9PKE3|E9PKE3_HUMAN/tr|B4DI39|B4DI39_HUMAN/tr|B…		4.37	0		0	2	MASCOT		T
	R20180100087_1,9315	R.VEIIANDQGNR.I ! K.VEIIANDQGNR.T ! R.VEILANDQGNR.T	1228.63	-0.00305	2	1	73.55	0	3.74e-06	0|0	sp|P11021|GRP78_HUMAN/tr|V9HWB4|V9HWB4_HUMAN/tr|B4DEF7|B4DEF7_HUMAN ! sp|P34931|HS71L_HUMAN/sp|P54652|HSP72_HUMAN/sp|P0DMV8|HS71A_HUMAN/sp|P0DMV9|HS71B_HUMAN/sp|P11142|HSP7C_HUMAN/tr|A0A0G2JIW1|A0A0G2JIW1_HUMAN/tr|B4DVU9|B4DVU9_HUMAN/tr|B4DI54|B4DI54_HUMAN/tr|Q53FA3|Q53FA3_HUMAN/tr|V9HW22|V9HW22_HUMAN/tr|Q53GZ6|Q53GZ6_HUMAN/tr|B3KUS2|B3KUS2_HUMAN/tr|E9PKE3|E9PKE3_HUMAN/tr|B4DI39|B4DI39_HUMAN/tr|B…		4.37	0		0	2	MASCOT		T
	R20180100087_1,9954	R.VEIIANDQGNR.I ! K.VEIIANDQGNR.T ! R.VEILANDQGNR.T	1228.63	-0.00071	2	1	45.92	0	0.00213	0|0	sp|P11021|GRP78_HUMAN/tr|V9HWB4|V9HWB4_HUMAN/tr|B4DEF7|B4DEF7_HUMAN ! sp|P34931|HS71L_HUMAN/sp|P54652|HSP72_HUMAN/sp|P0DMV8|HS71A_HUMAN/sp|P0DMV9|HS71B_HUMAN/sp|P11142|HSP7C_HUMAN/tr|A0A0G2JIW1|A0A0G2JIW1_HUMAN/tr|B4DVU9|B4DVU9_HUMAN/tr|B4DI54|B4DI54_HUMAN/tr|Q53FA3|Q53FA3_HUMAN/tr|V9HW22|V9HW22_HUMAN/tr|Q53GZ6|Q53GZ6_HUMAN/tr|B3KUS2|B3KUS2_HUMAN/tr|E9PKE3|E9PKE3_HUMAN/tr|B4DI39|B4DI39_HUMAN/tr|B…		4.37	0		0	2	MASCOT		T
	R20180100087_1,12060	R.VEIIANDQGNR.I ! K.VEIIANDQGNR.T ! R.VEILANDQGNR.T	1228.63	-0.00611	2	1	20.45	0	0.764	0|0	sp|P11021|GRP78_HUMAN/tr|V9HWB4|V9HWB4_HUMAN/tr|B4DEF7|B4DEF7_HUMAN ! sp|P34931|HS71L_HUMAN/sp|P54652|HSP72_HUMAN/sp|P0DMV8|HS71A_HUMAN/sp|P0DMV9|HS71B_HUMAN/sp|P11142|HSP7C_HUMAN/tr|A0A0G2JIW1|A0A0G2JIW1_HUMAN/tr|B4DVU9|B4DVU9_HUMAN/tr|B4DI54|B4DI54_HUMAN/tr|Q53FA3|Q53FA3_HUMAN/tr|V9HW22|V9HW22_HUMAN/tr|Q53GZ6|Q53GZ6_HUMAN/tr|B3KUS2|B3KUS2_HUMAN/tr|E9PKE3|E9PKE3_HUMAN/tr|B4DI39|B4DI39_HUMAN/tr|B…		4.37	0		0	2	MASCOT		T
	R20180100087_1,1634	R.VTAEDK.G	662.336	0.00019	2	1	36.56	0	0.0244	0|0	sp|P11021|GRP78_HUMAN/tr|V9HWB4|V9HWB4_HUMAN		4.37	0		0	2	MASCOT		T
$27-1	sp|Q92598|HS105_HUMAN Heat shock protein 105 kDa OS=Homo sapiens GN=HSPH1 PE=1 SV=1	27	24	0.3566	96863.9	5.28
$27-2	tr|A0A024RDS1|A0A024RDS1_HUMAN Heat shock 105kDa/110kDa protein 1, isoform CRA_c OS=Homo sapiens GN=HSPH1 PE=3 SV=1	27	24	0.3566	96863.9	5.28
$27-3	tr|A0A024RDQ0|A0A024RDQ0_HUMAN Heat shock 105kDa/110kDa protein 1, isoform CRA_a OS=Homo sapiens GN=HSPH1 PE=3 SV=1	27	24	0.3759	92115	5.42
	R20180100087_1,26682	K.DLLNMYIETEGK.M	1425.69	0.00245	2	1	52.12	0	0.0015	0|0	sp|Q92598|HS105_HUMAN/tr|A0A024RDQ0|A0A024RDQ0_HUMAN/tr|B4DF68|B4DF68_HUMAN/tr|A0A024RDS1|A0A024RDS1_HUMAN/tr|A0A0A0MSM0|A0A0A0MSM0_HUMAN/tr|B4DY72|B4DY72_HUMAN		4.14	0		0	2	MASCOT		T
	R20180100087_1,9294	K.ELNNTCEPVVTQPKPK.I	1853.94	0.00384	2	1	58.58	0	0.000267	0|0	sp|Q92598|HS105_HUMAN/tr|A0A024RDQ0|A0A024RDQ0_HUMAN/tr|B4DF68|B4DF68_HUMAN/tr|A0A024RDS1|A0A024RDS1_HUMAN/tr|Q5TBM3|Q5TBM3_HUMAN/tr|A0A0A0MSM0|A0A0A0MSM0_HUMAN/tr|B4DY72|B4DY72_HUMAN		6.23	0		0	2	MASCOT		T
	R20180100087_1,15023	K.FICEQDHQNFLR.L	1606.74	-0.00019	3	1	39.67	0	0.00411	0|0	sp|Q92598|HS105_HUMAN/tr|A0A024RDQ0|A0A024RDQ0_HUMAN/tr|B4DF68|B4DF68_HUMAN/tr|A0A024RDS1|A0A024RDS1_HUMAN/tr|A0A0A0MSM0|A0A0A0MSM0_HUMAN/tr|B4DY72|B4DY72_HUMAN		5.32	0		0	2	MASCOT		T
	R20180100087_1,28677	K.IEVPLYSLLEQTHLK.V	1783	-0.00191	3	1	56.93	0	8.93e-05	0|0	sp|Q92598|HS105_HUMAN/tr|A0A024RDQ0|A0A024RDQ0_HUMAN/tr|B4DF68|B4DF68_HUMAN/tr|B4DZB4|B4DZB4_HUMAN/tr|A0A024RDS1|A0A024RDS1_HUMAN/tr|A0A0A0MSM0|A0A0A0MSM0_HUMAN/tr|B4DY72|B4DY72_HUMAN		5.4	0		0	2	MASCOT		T
	R20180100087_1,28748	K.IEVPLYSLLEQTHLK.V	1783	-0.00494	2	1	43.22	0	0.00204	0|0	sp|Q92598|HS105_HUMAN/tr|A0A024RDQ0|A0A024RDQ0_HUMAN/tr|B4DF68|B4DF68_HUMAN/tr|B4DZB4|B4DZB4_HUMAN/tr|A0A024RDS1|A0A024RDS1_HUMAN/tr|A0A0A0MSM0|A0A0A0MSM0_HUMAN/tr|B4DY72|B4DY72_HUMAN		5.4	0		0	2	MASCOT		T
	R20180100087_1,4556	K.IGTPVK.V	614.387	-0.00073	2	1	29.21	0	0.0526	0|0	sp|Q92598|HS105_HUMAN/tr|A0A024RDQ0|A0A024RDQ0_HUMAN/tr|B4DF68|B4DF68_HUMAN/tr|A0A024RDS1|A0A024RDS1_HUMAN/tr|A0A0A0MSM0|A0A0A0MSM0_HUMAN/tr|B4DY72|B4DY72_HUMAN		8.75	0		0	2	MASCOT		T
	R20180100087_1,2994	K.KVDQPPEAK.K	1011.55	0.00013	3	1	31.3	0	0.038	0|0	sp|Q92598|HS105_HUMAN/tr|A0A024RDQ0|A0A024RDQ0_HUMAN/tr|B4DF68|B4DF68_HUMAN/tr|A0A024RDS1|A0A024RDS1_HUMAN/tr|A0A0A0MSM0|A0A0A0MSM0_HUMAN/tr|B4DY72|B4DY72_HUMAN		6.07	1		0	2	MASCOT		T
	R20180100087_1,28702	K.LMSSNSTDLPLNIECFMNDK.D	2329.05	-0.00085	2	1	53.81	0	0.000133	0|0	sp|Q92598|HS105_HUMAN/tr|A0A024RDQ0|A0A024RDQ0_HUMAN/tr|B4DF68|B4DF68_HUMAN/tr|B4DZB4|B4DZB4_HUMAN/tr|A0A024RDS1|A0A024RDS1_HUMAN/tr|A0A0A0MSM0|A0A0A0MSM0_HUMAN/tr|B4DY72|B4DY72_HUMAN		4.03	0		0	2	MASCOT		T
	R20180100087_1,25037	K.NAVEEYVYEFR.D	1418.66	4e-05	2	1	68.57	0	6.35e-06	0|0	sp|Q92598|HS105_HUMAN/tr|A0A024RDQ0|A0A024RDQ0_HUMAN/tr|B4DF68|B4DF68_HUMAN/tr|A0A024RDS1|A0A024RDS1_HUMAN/tr|A0A0A0MSM0|A0A0A0MSM0_HUMAN/tr|B4DY72|B4DY72_HUMAN		4.25	0		0	2	MASCOT		T
	R20180100087_1,8882	K.NQQITHANNTVSNFK.R	1715.85	-0.00216	3	1	58.99	0	8.53e-05	0|0	sp|Q92598|HS105_HUMAN/tr|A0A024RDQ0|A0A024RDQ0_HUMAN/tr|R4GN69|R4GN69_HUMAN/tr|B4DZB4|B4DZB4_HUMAN/tr|A0A024RDS1|A0A024RDS1_HUMAN/tr|A0A0A0MSM0|A0A0A0MSM0_HUMAN		8.76	0		0	2	MASCOT		T
	R20180100087_1,8883	K.NQQITHANNTVSNFK.R	1715.85	-0.00286	2	1	97.23	0	1.29e-08	0|0	sp|Q92598|HS105_HUMAN/tr|A0A024RDQ0|A0A024RDQ0_HUMAN/tr|R4GN69|R4GN69_HUMAN/tr|B4DZB4|B4DZB4_HUMAN/tr|A0A024RDS1|A0A024RDS1_HUMAN/tr|A0A0A0MSM0|A0A0A0MSM0_HUMAN		8.76	0		0	2	MASCOT		T
	R20180100087_1,24824	K.QAYVDKLEELMK.I	1466.76	-0.0021	3	1	46.42	0	0.00176	0|0	sp|Q92598|HS105_HUMAN/tr|A0A024RDQ0|A0A024RDQ0_HUMAN/tr|B4DF68|B4DF68_HUMAN/tr|A0A024RDS1|A0A024RDS1_HUMAN/tr|A0A0A0MSM0|A0A0A0MSM0_HUMAN/tr|B4DY72|B4DY72_HUMAN		4.68	1		0	2	MASCOT		T
	R20180100087_1,24845	K.QAYVDKLEELMK.I	1466.76	-0.00062	2	1	20.93	0	0.599	0|0	sp|Q92598|HS105_HUMAN/tr|A0A024RDQ0|A0A024RDQ0_HUMAN/tr|B4DF68|B4DF68_HUMAN/tr|A0A024RDS1|A0A024RDS1_HUMAN/tr|A0A0A0MSM0|A0A0A0MSM0_HUMAN/tr|B4DY72|B4DY72_HUMAN		4.68	1		0	2	MASCOT		T
	R20180100087_1,11725	K.QDLPSLDEKPR.I	1297.67	-0.00177	2	1	62.23	0	3.77e-05	0|0	sp|Q92598|HS105_HUMAN/tr|A0A024RDQ0|A0A024RDQ0_HUMAN/tr|B4DF68|B4DF68_HUMAN/tr|B4DZB4|B4DZB4_HUMAN/tr|A0A024RDS1|A0A024RDS1_HUMAN		4.56	0		0	2	MASCOT		T
	R20180100087_1,9441	K.SLDQDPVVR.A	1028.54	-0.00234	2	1	34.61	0	0.022	0|0	sp|Q92598|HS105_HUMAN/tr|A0A024RDQ0|A0A024RDQ0_HUMAN/tr|B4DF68|B4DF68_HUMAN/tr|A0A024RDS1|A0A024RDS1_HUMAN/tr|Q5TBM3|Q5TBM3_HUMAN/tr|A0A0A0MSM0|A0A0A0MSM0_HUMAN/tr|B4DY72|B4DY72_HUMAN		4.21	0		0	2	MASCOT		T
	R20180100087_1,29825	K.SVNEVMEWMNNVMNAQAK.K	2094.94	0.00458	2	1	89.56	0	3.37e-08	0|0	sp|Q92598|HS105_HUMAN/tr|A0A024RDQ0|A0A024RDQ0_HUMAN/tr|B4DF68|B4DF68_HUMAN/tr|A0A024RDS1|A0A024RDS1_HUMAN/tr|Q5TBM3|Q5TBM3_HUMAN/tr|A0A0A0MSM0|A0A0A0MSM0_HUMAN/tr|B4DY72|B4DY72_HUMAN		4.53	0		0	2	MASCOT		T
	R20180100087_1,19389	K.VEDVSAVEIVGGATR.I	1501.79	-0.00498	3	1	30.61	0	0.0713	0|0	sp|Q92598|HS105_HUMAN/tr|A0A024RDQ0|A0A024RDQ0_HUMAN/tr|B4DF68|B4DF68_HUMAN/tr|B4DZB4|B4DZB4_HUMAN/tr|A0A024RDS1|A0A024RDS1_HUMAN/tr|A0A0A0MSM0|A0A0A0MSM0_HUMAN/tr|B4DY72|B4DY72_HUMAN		4.14	0		0	2	MASCOT		T
	R20180100087_1,27333	K.VLGTAFDPFLGGK.N	1321.72	0.00136	2	1	64.9	0	2.42e-05	0|0	sp|Q92598|HS105_HUMAN/tr|A0A024RDQ0|A0A024RDQ0_HUMAN/tr|B4DF68|B4DF68_HUMAN/tr|B4DZB4|B4DZB4_HUMAN/tr|A0A024RDS1|A0A024RDS1_HUMAN		5.81	0		0	2	MASCOT		T
	R20180100087_1,29873	K.VVNVELPIEANLVWQLGK.D	2021.14	-0.00029	2	1	53.6	0	0.000141	0|0	sp|Q92598|HS105_HUMAN/tr|A0A024RDQ0|A0A024RDQ0_HUMAN/tr|B4DF68|B4DF68_HUMAN/tr|A0A024RDS1|A0A024RDS1_HUMAN/tr|A0A0A0MSM0|A0A0A0MSM0_HUMAN/tr|B4DY72|B4DY72_HUMAN		4.53	0		0	2	MASCOT		T
	R20180100087_1,6888	K.YNHIDESEMK.K	1265.55	0.00176	2	1	47.11	0	0.000327	0|0	sp|Q92598|HS105_HUMAN/tr|A0A024RDQ0|A0A024RDQ0_HUMAN/tr|B4DF68|B4DF68_HUMAN/tr|A0A024RDS1|A0A024RDS1_HUMAN/tr|Q5TBM3|Q5TBM3_HUMAN/tr|A0A0A0MSM0|A0A0A0MSM0_HUMAN/tr|B4DY72|B4DY72_HUMAN		4.65	0		0	2	MASCOT		T
	R20180100087_1,24052	R.AGGIETIANEFSDR.C	1479.71	0.00043	2	1	67.76	0	1.02e-05	0|0	sp|Q92598|HS105_HUMAN/tr|A0A024RDQ0|A0A024RDQ0_HUMAN/tr|R4GN69|R4GN69_HUMAN/tr|A0A024RDS1|A0A024RDS1_HUMAN		4.14	0		0	2	MASCOT		T
	R20180100087_1,16818	R.CTPSVISFGSK.N	1182.58	0.00224	2	1	49.11	0	0.000683	0|0	sp|Q92598|HS105_HUMAN/tr|A0A024RDQ0|A0A024RDQ0_HUMAN/tr|R4GN69|R4GN69_HUMAN/tr|B4DZB4|B4DZB4_HUMAN/tr|A0A024RDS1|A0A024RDS1_HUMAN		8.22	0		0	2	MASCOT		T
	R20180100087_1,4144	R.FQEAEERPK.M	1133.56	-0.00231	2	1	41.7	0	0.00563	0|0	sp|Q92598|HS105_HUMAN/tr|A0A024RDQ0|A0A024RDQ0_HUMAN/tr|B4DF68|B4DF68_HUMAN/tr|A0A024RDS1|A0A024RDS1_HUMAN/tr|A0A0A0MSM0|A0A0A0MSM0_HUMAN/tr|B4DY72|B4DY72_HUMAN		4.79	0		0	2	MASCOT		T
	R20180100087_1,27818	R.GPFELEAFYSDPQGVPYPEAK.I	2341.1	-0.00207	2	1	76.53	0	1.17e-06	0|0	sp|Q92598|HS105_HUMAN/tr|A0A024RDQ0|A0A024RDQ0_HUMAN/tr|B4DF68|B4DF68_HUMAN/tr|B4DZB4|B4DZB4_HUMAN/tr|A0A024RDS1|A0A024RDS1_HUMAN/tr|A0A0A0MSM0|A0A0A0MSM0_HUMAN/tr|B4DY72|B4DY72_HUMAN		4	0		0	2	MASCOT		T
	R20180100087_1,26827	R.SQFEELCAELLQK.I	1594.78	-0.00069	3	1	40.15	0	0.00702	0|0	sp|Q92598|HS105_HUMAN/tr|A0A024RDQ0|A0A024RDQ0_HUMAN/tr|B4DF68|B4DF68_HUMAN/tr|B4DZB4|B4DZB4_HUMAN/tr|A0A024RDS1|A0A024RDS1_HUMAN/tr|A0A0A0MSM0|A0A0A0MSM0_HUMAN/tr|B4DY72|B4DY72_HUMAN		4.25	0		0	2	MASCOT		T
	R20180100087_1,4384	R.TIGVAAK.N	659.409	-0.00052	2	1	32.17	0	0.0527	0|0	sp|Q92598|HS105_HUMAN/tr|A0A024RDQ0|A0A024RDQ0_HUMAN/tr|R4GN69|R4GN69_HUMAN/tr|B4DZB4|B4DZB4_HUMAN/tr|A0A024RDS1|A0A024RDS1_HUMAN/tr|A0A0A0MSM0|A0A0A0MSM0_HUMAN		8.41	0		0	2	MASCOT		T
	R20180100087_1,5385	R.TPNGPNIDK.K	955.484	0.00138	2	1	49.8	0	0.000688	0|0	sp|Q92598|HS105_HUMAN/tr|A0A024RDQ0|A0A024RDQ0_HUMAN/tr|B4DF68|B4DF68_HUMAN/tr|A0A024RDS1|A0A024RDS1_HUMAN/tr|Q5TBM3|Q5TBM3_HUMAN/tr|A0A0A0MSM0|A0A0A0MSM0_HUMAN/tr|B4DY72|B4DY72_HUMAN		5.5	0		0	2	MASCOT		T
$28-1	tr|A0A024R4F1|A0A024R4F1_HUMAN Enolase 1, (Alpha), isoform CRA_a OS=Homo sapiens GN=ENO1 PE=2 SV=1	60	23	0.6982	47168.4	7.01
$28-2	sp|P06733|ENOA_HUMAN Alpha-enolase OS=Homo sapiens GN=ENO1 PE=1 SV=2	60	23	0.6982	47168.4	7.01
	R20180100087_1,2573	K.AVEHINK.T	810.447	-0.00098	2	1	31.94	0	0.0309	0|0	sp|P06733|ENOA_HUMAN/tr|A0A024R4F1|A0A024R4F1_HUMAN/tr|A4UCS8|A4UCS8_HUMAN/tr|L0R6S1|L0R6S1_HUMAN/tr|K7EM90|K7EM90_HUMAN		6.79	0		0	2	MASCOT		T
	R20180100087_1,22852	K.DATNVGDEGGFAPNILENK.E	1960.92	-0.00166	2	1	101.13	0	6.56e-09	0|0	sp|P06733|ENOA_HUMAN/tr|A0A024R4F1|A0A024R4F1_HUMAN/tr|E2DRY6|E2DRY6_HUMAN		3.92	0		0	2	MASCOT		T
	R20180100087_1,23816	K.DATNVGDEGGFAPNILENK.E	1960.92	0.00672	2	1	52.36	0	0.000468	0|0	sp|P06733|ENOA_HUMAN/tr|A0A024R4F1|A0A024R4F1_HUMAN/tr|E2DRY6|E2DRY6_HUMAN		3.92	0		0	2	MASCOT		T
	R20180100087_1,29036	K.DYPVVSIEDPFDQDDWGAWQK.F	2510.11	0.0016	2	1	64.42	0	1.04e-05	0|0	sp|P06733|ENOA_HUMAN/tr|A0A024R4F1|A0A024R4F1_HUMAN/tr|E2DRY6|E2DRY6_HUMAN		3.61	0		0	2	MASCOT		T
	R20180100087_1,29198	K.DYPVVSIEDPFDQDDWGAWQK.F	2510.11	0.0007	3	1	64.2	0	1.1e-05	0|0	sp|P06733|ENOA_HUMAN/tr|A0A024R4F1|A0A024R4F1_HUMAN/tr|E2DRY6|E2DRY6_HUMAN		3.61	0		0	2	MASCOT		T
	R20180100087_1,30619	K.FGANAILGVSLAVCK.A	1519.83	0.00358	2	1	25.43	0	2.67	0|0	sp|P06733|ENOA_HUMAN/sp|P09104|ENOG_HUMAN/sp|P13929|ENOB_HUMAN/tr|A0A024R4F1|A0A024R4F1_HUMAN/tr|Q6FHV6|Q6FHV6_HUMAN/tr|D3DTL4|D3DTL4_HUMAN/tr|E5RI09|E5RI09_HUMAN/tr|A8K3B0|A8K3B0_HUMAN/tr|E5RG95|E5RG95_HUMAN/tr|K7EPM1|K7EPM1_HUMAN/tr|E2DRY6|E2DRY6_HUMAN/tr|K7EKN2|K7EKN2_HUMAN/tr|A4UCS8|A4UCS8_HUMAN/tr|E5RGZ4|E5RGZ4_HUMAN/tr|K7EM90|K7EM90_HUMAN		8.22	0		0	2	MASCOT		T
	R20180100087_1,32689	K.FGANAILGVSLAVCK.A	1519.83	-0.00022	2	1	47.42	0	0.0166	0|0	sp|P06733|ENOA_HUMAN/sp|P09104|ENOG_HUMAN/sp|P13929|ENOB_HUMAN/tr|A0A024R4F1|A0A024R4F1_HUMAN/tr|Q6FHV6|Q6FHV6_HUMAN/tr|D3DTL4|D3DTL4_HUMAN/tr|E5RI09|E5RI09_HUMAN/tr|A8K3B0|A8K3B0_HUMAN/tr|E5RG95|E5RG95_HUMAN/tr|K7EPM1|K7EPM1_HUMAN/tr|E2DRY6|E2DRY6_HUMAN/tr|K7EKN2|K7EKN2_HUMAN/tr|A4UCS8|A4UCS8_HUMAN/tr|E5RGZ4|E5RGZ4_HUMAN/tr|K7EM90|K7EM90_HUMAN		8.22	0		0	2	MASCOT		T
	R20180100087_1,25012	K.FTASAGIQVVGDDLTVTNPK.R	2033.05	-0.00123	2	1	97.45	0	1.43e-08	0|0	sp|P06733|ENOA_HUMAN/tr|A0A024R4F1|A0A024R4F1_HUMAN/tr|A4QMW8|A4QMW8_HUMAN/tr|E2DRY6|E2DRY6_HUMAN		4.21	0		0	2	MASCOT		T
	R20180100087_1,25643	K.FTASAGIQVVGDDLTVTNPK.R	2033.05	-0.00187	2	1	130.59	0	6.78e-12	0|0	sp|P06733|ENOA_HUMAN/tr|A0A024R4F1|A0A024R4F1_HUMAN/tr|A4QMW8|A4QMW8_HUMAN/tr|E2DRY6|E2DRY6_HUMAN		4.21	0		0	2	MASCOT		T
	R20180100087_1,25668	K.FTASAGIQVVGDDLTVTNPK.R	2033.05	-0.00032	3	1	74.23	0	2.94e-06	0|0	sp|P06733|ENOA_HUMAN/tr|A0A024R4F1|A0A024R4F1_HUMAN/tr|A4QMW8|A4QMW8_HUMAN/tr|E2DRY6|E2DRY6_HUMAN		4.21	0		0	2	MASCOT		T
	R20180100087_1,26293	K.FTASAGIQVVGDDLTVTNPK.R	2033.05	0.00341	2	1	120.96	0	6.29e-11	0|0	sp|P06733|ENOA_HUMAN/tr|A0A024R4F1|A0A024R4F1_HUMAN/tr|A4QMW8|A4QMW8_HUMAN/tr|E2DRY6|E2DRY6_HUMAN		4.21	0		0	2	MASCOT		T
	R20180100087_1,30296	K.FTASAGIQVVGDDLTVTNPK.R	2033.05	0.00167	2	1	44.96	0	0.00248	0|0	sp|P06733|ENOA_HUMAN/tr|A0A024R4F1|A0A024R4F1_HUMAN/tr|A4QMW8|A4QMW8_HUMAN/tr|E2DRY6|E2DRY6_HUMAN		4.21	0		0	2	MASCOT		T
	R20180100087_1,30402	K.FTASAGIQVVGDDLTVTNPK.R	2033.05	0.00334	3	1	41.92	0	0.0148	0|0	sp|P06733|ENOA_HUMAN/tr|A0A024R4F1|A0A024R4F1_HUMAN/tr|A4QMW8|A4QMW8_HUMAN/tr|E2DRY6|E2DRY6_HUMAN		4.21	0		0	2	MASCOT		T
	R20180100087_1,31263	K.FTASAGIQVVGDDLTVTNPK.R	2033.05	-0.00591	2	1	58.03	0	0.000119	0|0	sp|P06733|ENOA_HUMAN/tr|A0A024R4F1|A0A024R4F1_HUMAN/tr|A4QMW8|A4QMW8_HUMAN/tr|E2DRY6|E2DRY6_HUMAN		4.21	0		0	2	MASCOT		T
	R20180100087_1,32005	K.FTASAGIQVVGDDLTVTNPK.R	2033.05	-0.00935	3	1	44.58	0	0.00258	0|0	sp|P06733|ENOA_HUMAN/tr|A0A024R4F1|A0A024R4F1_HUMAN/tr|A4QMW8|A4QMW8_HUMAN/tr|E2DRY6|E2DRY6_HUMAN		4.21	0		0	2	MASCOT		T
	R20180100087_1,33282	K.FTASAGIQVVGDDLTVTNPK.R	2033.05	0.00661	3	1	35.91	0	0.0208	0|0	sp|P06733|ENOA_HUMAN/tr|A0A024R4F1|A0A024R4F1_HUMAN/tr|A4QMW8|A4QMW8_HUMAN/tr|E2DRY6|E2DRY6_HUMAN		4.21	0		0	2	MASCOT		T
	R20180100087_1,33791	K.FTASAGIQVVGDDLTVTNPK.R	2033.05	0.00214	3	1	53.23	0	0.00109	0|0	sp|P06733|ENOA_HUMAN/tr|A0A024R4F1|A0A024R4F1_HUMAN/tr|A4QMW8|A4QMW8_HUMAN/tr|E2DRY6|E2DRY6_HUMAN		4.21	0		0	2	MASCOT		T
	R20180100087_1,4019	K.KLNVTEQEK.I	1088.59	-0.00093	3	1	31.6	0	0.0708	0|0	sp|P06733|ENOA_HUMAN/tr|L0R849|L0R849_HUMAN/tr|A0A024R4F1|A0A024R4F1_HUMAN/tr|A4UCS8|A4UCS8_HUMAN/tr|K7EM90|K7EM90_HUMAN		6.14	1		0	2	MASCOT		T
	R20180100087_1,28496	K.LAM*QEFMILPVGAANFR.E	1923.98	7e-05	3	1	21.97	0	0.504	0|0	sp|P06733|ENOA_HUMAN/tr|A0A024R4F1|A0A024R4F1_HUMAN/tr|E2DRY6|E2DRY6_HUMAN/tr|A4UCS8|A4UCS8_HUMAN/tr|K7EM90|K7EM90_HUMAN		6	0	15.994919 Oxidation (M)	0	2	MASCOT		T
	R20180100087_1,29761	K.LAMQEFMILPVGAANFR.E	1907.99	0.00727	2	1	46.5	0	0.00483	0|0	sp|P06733|ENOA_HUMAN/tr|A0A024R4F1|A0A024R4F1_HUMAN/tr|E2DRY6|E2DRY6_HUMAN/tr|A4UCS8|A4UCS8_HUMAN/tr|K7EM90|K7EM90_HUMAN		6	0		0	2	MASCOT		T
	R20180100087_1,29783	K.LAMQEFMILPVGAANFR.E	1907.99	-0.00185	3	1	48.56	0	0.00112	0|0	sp|P06733|ENOA_HUMAN/tr|A0A024R4F1|A0A024R4F1_HUMAN/tr|E2DRY6|E2DRY6_HUMAN/tr|A4UCS8|A4UCS8_HUMAN/tr|K7EM90|K7EM90_HUMAN		6	0		0	2	MASCOT		T
	R20180100087_1,16798	K.LAQANGWGVMVSHR.S	1525.77	0.00031	3	1	60.8	0	6.34e-05	0|0	sp|P06733|ENOA_HUMAN/tr|A0A024R4F1|A0A024R4F1_HUMAN/tr|A4QMW8|A4QMW8_HUMAN/tr|E2DRY6|E2DRY6_HUMAN		9.76	0		0	2	MASCOT		T
	R20180100087_1,16821	K.LAQANGWGVMVSHR.S	1525.77	0.00163	2	1	49.67	0	0.000827	0|0	sp|P06733|ENOA_HUMAN/tr|A0A024R4F1|A0A024R4F1_HUMAN/tr|A4QMW8|A4QMW8_HUMAN/tr|E2DRY6|E2DRY6_HUMAN		9.76	0		0	2	MASCOT		T
	R20180100087_1,9837	K.LMIEM*DGTENK.S	1296.58	-0.00051	2	1	38.87	0	0.00403	0|0	sp|P06733|ENOA_HUMAN/tr|L0R849|L0R849_HUMAN/tr|A0A024R4F1|A0A024R4F1_HUMAN/tr|A4UCS8|A4UCS8_HUMAN/tr|K7EM90|K7EM90_HUMAN		4.14	0	15.994919 Oxidation (M)	0	2	MASCOT		T
	R20180100087_1,15837	K.LMIEMDGTENK.S	1280.59	-0.00185	2	1	52.72	0	0.000221	0|0	sp|P06733|ENOA_HUMAN/tr|L0R849|L0R849_HUMAN/tr|A0A024R4F1|A0A024R4F1_HUMAN/tr|A4UCS8|A4UCS8_HUMAN/tr|K7EM90|K7EM90_HUMAN		4.14	0		0	2	MASCOT		T
	R20180100087_1,16475	K.LMIEMDGTENK.S	1280.59	0.00413	2	1	25.73	0	0.101	0|0	sp|P06733|ENOA_HUMAN/tr|L0R849|L0R849_HUMAN/tr|A0A024R4F1|A0A024R4F1_HUMAN/tr|A4UCS8|A4UCS8_HUMAN/tr|K7EM90|K7EM90_HUMAN		4.14	0		0	2	MASCOT		T
	R20180100087_1,5463	K.LNVTEQEK.I	960.5	-0.00147	2	1	26.64	0	0.225	0|0	sp|P06733|ENOA_HUMAN/tr|L0R849|L0R849_HUMAN/tr|A0A024R4F1|A0A024R4F1_HUMAN/tr|A4UCS8|A4UCS8_HUMAN/tr|K7EM90|K7EM90_HUMAN		4.53	0		0	2	MASCOT		T
	R20180100087_1,2078	K.SPDDPSR.Y	773.342	-0.0001	2	1	35.3	0	0.009	0|0	sp|P06733|ENOA_HUMAN/tr|A0A024R4F1|A0A024R4F1_HUMAN/tr|E2DRY6|E2DRY6_HUMAN		4.21	0		0	2	MASCOT		T
	R20180100087_1,11723	K.TIAPALVSK.K	899.556	-0.00228	2	1	28.66	0	0.0738	0|0	sp|P06733|ENOA_HUMAN/tr|A0A024R4F1|A0A024R4F1_HUMAN/tr|A4UCS8|A4UCS8_HUMAN/tr|K7EM90|K7EM90_HUMAN		8.41	0		0	2	MASCOT		T
	R20180100087_1,17099	K.VNQIGSVTESIQACK.L ! K.VNQIGSVTESLQACK.L	1633.82	0.00619	2	1	86.36	0	2.48e-07	0|0	sp|P13929|ENOB_HUMAN/tr|D3DTL4|D3DTL4_HUMAN/tr|Q9NPL4|Q9NPL4_HUMAN ! sp|P06733|ENOA_HUMAN/tr|A0A024R4F1|A0A024R4F1_HUMAN/tr|A4QMW8|A4QMW8_HUMAN/tr|E2DRY6|E2DRY6_HUMAN		5.97	0		0	2	MASCOT		T
	R20180100087_1,17711	K.VNQIGSVTESIQACK.L ! K.VNQIGSVTESLQACK.L	1633.82	0.00185	2	1	72.72	0	5.64e-06	0|0	sp|P13929|ENOB_HUMAN/tr|D3DTL4|D3DTL4_HUMAN/tr|Q9NPL4|Q9NPL4_HUMAN ! sp|P06733|ENOA_HUMAN/tr|A0A024R4F1|A0A024R4F1_HUMAN/tr|A4QMW8|A4QMW8_HUMAN/tr|E2DRY6|E2DRY6_HUMAN		5.97	0		0	2	MASCOT		T
	R20180100087_1,18794	K.VNQIGSVTESIQACK.L ! K.VNQIGSVTESLQACK.L	1633.82	-0.00173	2	1	48.85	0	0.00339	0|0	sp|P13929|ENOB_HUMAN/tr|D3DTL4|D3DTL4_HUMAN/tr|Q9NPL4|Q9NPL4_HUMAN ! sp|P06733|ENOA_HUMAN/tr|A0A024R4F1|A0A024R4F1_HUMAN/tr|A4QMW8|A4QMW8_HUMAN/tr|E2DRY6|E2DRY6_HUMAN		5.97	0		0	2	MASCOT		T
	R20180100087_1,28539	K.VVIGMDVAASEFFR.S	1540.78	0.00071	2	1	83.89	0	2.98e-07	0|0	sp|P06733|ENOA_HUMAN/tr|A0A024R4F1|A0A024R4F1_HUMAN/tr|E2DRY6|E2DRY6_HUMAN		4.37	0		0	2	MASCOT		T
	R20180100087_1,28576	K.VVIGMDVAASEFFR.S	1540.78	-0.00052	3	1	65.61	0	2.01e-05	0|0	sp|P06733|ENOA_HUMAN/tr|A0A024R4F1|A0A024R4F1_HUMAN/tr|E2DRY6|E2DRY6_HUMAN		4.37	0		0	2	MASCOT		T
	R20180100087_1,29409	K.VVIGMDVAASEFFR.S	1540.78	0.00171	2	1	65.49	0	2.06e-05	0|0	sp|P06733|ENOA_HUMAN/tr|A0A024R4F1|A0A024R4F1_HUMAN/tr|E2DRY6|E2DRY6_HUMAN		4.37	0		0	2	MASCOT		T
	R20180100087_1,30080	K.VVIGMDVAASEFFR.S	1540.78	0.00233	2	1	74.94	0	2.41e-06	0|0	sp|P06733|ENOA_HUMAN/tr|A0A024R4F1|A0A024R4F1_HUMAN/tr|E2DRY6|E2DRY6_HUMAN		4.37	0		0	2	MASCOT		T
	R20180100087_1,31768	K.VVIGMDVAASEFFR.S	1540.78	0.00091	2	1	99.25	0	8.69e-09	0|0	sp|P06733|ENOA_HUMAN/tr|A0A024R4F1|A0A024R4F1_HUMAN/tr|E2DRY6|E2DRY6_HUMAN		4.37	0		0	2	MASCOT		T
	R20180100087_1,32756	K.VVIGMDVAASEFFR.S	1540.78	0.00391	2	1	94.66	0	2.61e-08	0|0	sp|P06733|ENOA_HUMAN/tr|A0A024R4F1|A0A024R4F1_HUMAN/tr|E2DRY6|E2DRY6_HUMAN		4.37	0		0	2	MASCOT		T
	R20180100087_1,33842	K.VVIGMDVAASEFFR.S	1540.78	0.00141	2	1	51.08	0	0.000567	0|0	sp|P06733|ENOA_HUMAN/tr|A0A024R4F1|A0A024R4F1_HUMAN/tr|E2DRY6|E2DRY6_HUMAN		4.37	0		0	2	MASCOT		T
	R20180100087_1,16247	K.YDLDFK.S	800.382	-0.00051	2	1	27.41	0	0.0457	0|0	sp|P06733|ENOA_HUMAN/sp|P09104|ENOG_HUMAN/sp|P13929|ENOB_HUMAN/tr|A0A024R4F1|A0A024R4F1_HUMAN/tr|Q6FHV6|Q6FHV6_HUMAN/tr|D3DTL4|D3DTL4_HUMAN/tr|F5H0C8|F5H0C8_HUMAN/tr|A8K3B0|A8K3B0_HUMAN/tr|E2DRY6|E2DRY6_HUMAN/tr|E5RGZ4|E5RGZ4_HUMAN/tr|U3KQP4|U3KQP4_HUMAN/tr|B4DUJ6|B4DUJ6_HUMAN		4.21	0		0	2	MASCOT		T
	R20180100087_1,26757	R.AAVPSGASTGIYEALELR.D	1804.94	-0.00122	2	1	100.83	0	7.41e-09	0|0	sp|P06733|ENOA_HUMAN/sp|P09104|ENOG_HUMAN/sp|P13929|ENOB_HUMAN/tr|A0A024R4F1|A0A024R4F1_HUMAN/tr|Q6FHV6|Q6FHV6_HUMAN/tr|E5RI09|E5RI09_HUMAN/tr|F5H1C3|F5H1C3_HUMAN/tr|F5H0C8|F5H0C8_HUMAN/tr|A8K3B0|A8K3B0_HUMAN/tr|E5RG95|E5RG95_HUMAN/tr|K7EPM1|K7EPM1_HUMAN/tr|K7EKN2|K7EKN2_HUMAN/tr|E5RGZ4|E5RGZ4_HUMAN/tr|K7EM90|K7EM90_HUMAN/tr|B4DUJ6|B4DUJ6_HUMAN		4.53	0		0	2	MASCOT		T
[truncated: 17,188 more rows]
