# Supplementary material for: Reprogramming of cancer invasiveness and macrophage education via a nanostructured antagonist of the TGFβ receptor
Source: Royal Society of Chemistry journal article supplement (doi:10.1039/c9mh00388f), 2019-01-01
Supplement: c9mh00388f2.pdf [file c9mh00388f2.pdf]

## Electronic Supplementary Information

**Table S1 Representative NDs-interacting transmembrane receptors identified by mass spectrometry.**

| Transmembrane Receptors |  |                                                              |
|-------------------------|--|--------------------------------------------------------------|
| UniProtKB               |  | Name                                                         |
| Q6IB11                  |  | Progesterone receptor membrane component 1                   |
| Q6I9U3                  |  | Mannose-6-phosphate receptor                                 |
| O95944                  |  | Natural cytotoxicity triggering receptor 2                   |
| Q05BV5                  |  | Opioid growth factor receptor                                |
| F5GWR7                  |  | Receptor-type tyrosine-protein phosphatase receptor $\delta$ |
| <b>D2JYI1</b>           |  | <b>TGF<math>\beta</math> receptor type-2</b>                 |
| B4DDJ5                  |  | Similar to Macrophage scavenger receptor types               |
| A8K1Z4                  |  | Leukemia inhibitory factor receptor                          |
| P42566                  |  | Epidermal growth factor receptor substrate 15                |
| Q9UL62                  |  | Short transient receptor 5                                   |
| A0A0A0MRB9              |  | X-linked interleukin-1 receptor accessory protein-like 2     |
| A0A087WX59              |  | Proteasomal ubiquitin receptor ADRM1                         |
| A0A087WUV8              |  | Signal recognition particle receptor subunit $\beta$         |
| Q9NR97                  |  | Toll-like receptor 8                                         |
| Q9GZP7                  |  | Vomerolateral type-1 receptor-1                              |
| Q7Z5H4                  |  | Vomerolateral type-1 receptor-5                              |
| P37288                  |  | Vasopressin V1a receptor                                     |
| P58181                  |  | Olfactory receptor 10A3                                      |
| Q17R88                  |  | Sortilin-related VPS10 domain containing receptor 3          |
| Q01638                  |  | Interleukin-1 receptor-like 1                                |
| P51686                  |  | C-C chemokine receptor type 9                                |
| Q3S2J4                  |  | Macrophage scavenger receptor                                |
| P21757                  |  | Thyroid hormone receptor                                     |
| F8VVC                   |  | TGF $\beta$ receptor type-1                                  |
| O75330                  |  | Hyaluronan mediated motility receptor                        |

**Table S2 Representative NDs-interacting cytoskeletons identified by mass spectrometry.**

| <b>Cytoskeletons</b> |  |                                                           |
|----------------------|--|-----------------------------------------------------------|
| UniProtKB            |  | Name                                                      |
| Q5HY54               |  | Filamin-A                                                 |
| Q5SU16               |  | Tubulin- $\beta$                                          |
| Q71U36               |  | Tubulin- $\alpha$ -1A                                     |
| B7Z1K5               |  | Tubulin- $\alpha$ chain                                   |
| Q8IZ29               |  | Tubulin- $\beta$ -4B chain                                |
| Q13885               |  | Tubulin $\beta$ -2A chain                                 |
| P04350               |  | Tubulin $\beta$ -4A chain                                 |
| C9J2C0_              |  | Tubulin $\alpha$ -8 chain                                 |
| E5RHG6               |  | Tubulin-specific chaperone A                              |
| Q9H4B7               |  | Tubulin $\beta$ -1 chain                                  |
| Q15813               |  | Tubulin-specific chaperone                                |
| A6NHL2               |  | Tubulin $\alpha$ chain-like 3                             |
| A4UCU2_              |  | $\beta$ -4 tubulin (Fragment)                             |
| H3BLT7               |  | Tubulin monoglycylase TTLL3 (Fragment)                    |
| O95922               |  | Tubulin polyglutamylase TTLL1                             |
| O75369               |  | Filamin-B                                                 |
| P68133               |  | Actin, $\alpha$ skeletal muscle                           |
| A0A0S2Z3G9           |  | Actinin $\alpha$ 4 isoform 1                              |
| H9KV75               |  | $\alpha$ -actinin-1                                       |
| Q53GK6               |  | $\beta$ actin variant (Fragment)                          |
| Q14315               |  | Filamin-C                                                 |
| A0A024R0E5           |  | Capping protein (Actin filament) muscle Z-line $\alpha$ 1 |
| B1AK88               |  | Capping protein (Actin filament)muscle Z-line $\beta$     |
| A4D0V4               |  | Capping protein (Actin filament) muscle Z-line $\alpha$ 2 |
| A5YM63               |  | NEFM protein                                              |

**Table S3 Representative NDs-interacting chaperones identified by mass spectrometry.**

| <b>Chaperones</b> |  |                                                        |
|-------------------|--|--------------------------------------------------------|
| UniProtKB         |  | Name                                                   |
| V9HW96            |  | Chaperonin containing TCP1                             |
| Q6FH24            |  | Prefoldin subunit 3                                    |
| F8W726            |  | Ubiquitin-associated protein 2-like                    |
| Q9Y5K6            |  | CD2-associated protein                                 |
| P42167            |  | Lamina-associated polypeptide 2                        |
| E9PAL7            |  | Translocon-associated protein subunit $\alpha$         |
| A0A024RDL1        |  | Chaperonin containing TCP1, subunit 6A                 |
| O95295            |  | SNARE-associated protein Snapin                        |
| Q53G55            |  | TNF receptor-associated protein 1                      |
| O15212            |  | Prefoldin subunit 6                                    |
| A0A024R6M6        |  | BCL2-associated athanogene 5                           |
| Q9P0L0            |  | Vesicle-associated membrane protein-associated protein |
| P78371            |  | T-complex protein 1 subunit $\beta$                    |
| P50991            |  | T-complex protein 1 subunit $\delta$                   |
| P50990            |  | T-complex protein 1 subunit $\theta$                   |
| P49368            |  | T-complex protein 1 subunit $\gamma$                   |
| P48643            |  | T-complex protein 1 subunit $\epsilon$                 |
| A0A024R3X4        |  | Heat shock 60kDa protein 1 (Chaperonin)                |
| E7EVA0            |  | Microtubule-associated protein                         |
| Q96A49            |  | Synapse-associated protein 1                           |
| Q9Y3F4            |  | Serine-threonine kinase receptor-associated protein    |
| A0A024R3V8        |  | Translin-associated factor X                           |
| Q09666            |  | Neuroblast differentiation-associated protein          |
| P17987            |  | T-complex protein 1 subunit $\alpha$                   |
| Q9UNN5            |  | FAS-associated factor 1                                |

**Table S4 Representative NDs-interacting enzymes identified by mass spectrometry.**

| <b>Enzymes</b> |  |                                               |
|----------------|--|-----------------------------------------------|
| UniProtKB      |  | Name                                          |
| V9HWB8         |  | Pyruvate kinase                               |
| P35520         |  | Cystathionine $\beta$ -synthase               |
| Q15185         |  | Prostaglandin E synthase 3                    |
| A0A0U1RQF0     |  | Fatty acid synthase                           |
| Q9H2P9         |  | Diphthine methyl ester synthase               |
| Q6UB35         |  | Monofunctional C1-tetrahydrofolate synthase   |
| A0A024R1Y2     |  | ATP-citrate synthase                          |
| Q15181         |  | Inorganic pyrophosphatase                     |
| P36871         |  | Adenylate kinase 2                            |
| P19623         |  | Spermidine synthase                           |
| P30049         |  | ATP synthase subunit $\delta$ , mitochondrial |
| P36871         |  | Phosphoglucomutase-1                          |
| Q9NPH2         |  | Inositol-3-phosphate synthase 1               |
| P31153         |  | S-adenosylmethionine synthase isoform type-2  |
| P29401         |  | Transketolase                                 |
| Q8WWH5         |  | Probable tRNA pseudouridine synthase 1        |
| P12277         |  | Creatine kinase B-type                        |
| O43175         |  | D-3-phosphoglycerate dehydrogenase            |
| V9HWH2         |  | ATP synthase subunit $\beta$                  |
| P11586         |  | C-1-tetrahydrofolate synthase                 |
| P56385         |  | ATP synthase subunit e                        |
| P07195         |  | L-lactate dehydrogenase                       |
| Q9NR45         |  | Sialic acid synthase                          |
| P00558         |  | Phosphoglycerate kinase 1                     |
| O75947         |  | ATP synthase subunit d                        |

**Table S5 Representative NDs-interacting signal transducers identified by mass spectrometry.**

| <b>Signal Transducers</b> |  |                                                               |
|---------------------------|--|---------------------------------------------------------------|
| UniProtKB                 |  | Name                                                          |
| Q2M3K2                    |  | Regulator of G-protein signaling 6                            |
| Q7Z426                    |  | Putative MAPK activating protein                              |
| J3KQ34                    |  | COP9 signalosome complex subunit 7b                           |
| E7EM64                    |  | COP9 signalosome complex subunit 6                            |
| O76094                    |  | Signal recognition particle subunit                           |
| H0YLA2                    |  | Signal recognition particle 14 kDa protein                    |
| Q92905                    |  | COP9 signalosome complex subunit 5                            |
| D6RFN0                    |  | COP9 signalosome complex subunit 4                            |
| B2RAY1                    |  | 5'-AMP-activated protein kinase catalytic subunit $\alpha$ -2 |
| AOA024R3V8                |  | Translin-associated factor X                                  |
| AOA024QZF6                |  | AKT1 substrate 1                                              |
| F8W930                    |  | Insulin-like growth factor 2 mRNA-binding protein 2           |
| Q9Y5X3                    |  | Sorting nexin-5                                               |
| P54646                    |  | 14-3-3 protein $\zeta/\delta$                                 |
| P61011                    |  | Signal recognition particle 54 kDa protein                    |
| Q6NZ61                    |  | Ras homolog enriched in brain                                 |
| Q07666                    |  | KH domain-containing transduction-associated protein 1        |
| Q13158                    |  | FAS-associated death domain protein                           |
| Q9P055                    |  | JNK1/MAPK8-associated membrane protein                        |
| Q14160                    |  | Protein scribble homolog                                      |
| Q92783                    |  | Signal transducing adapter molecule 1                         |
| P38919                    |  | Eukaryotic initiation factor 4A-III                           |
| B7Z4E1                    |  | Similar to X-linked interleukin-1 protein-like 2              |
| P22234                    |  | Multifunctional protein ADE2                                  |
| Q5TH30                    |  | NDRG family member 3                                          |

**Table S6 Representative NDs-interacting transcription factors identified by mass spectrometry.**

| Transcription Factors |  |                                                          |
|-----------------------|--|----------------------------------------------------------|
| UniProtKB             |  | Name                                                     |
| O15370                |  | Transcription factor SOX-12                              |
| P32519                |  | ETS-related transcription factor Elf-1                   |
| A0A024RDU9            |  | General transcription factor IIF subunit2                |
| A0A0B4J1Z5            |  | Transcription initiation factor IIA subunit 2            |
| P20290                |  | Transcription factor BTF3                                |
| Q96QR8                |  | Transcriptional activator protein Pur                    |
| Q86YP4                |  | Transcriptional repressor p66- $\alpha$                  |
| A0A0U1RRM1            |  | Transcriptional repressor p66- $\beta$                   |
| Q96K17                |  | Transcription factor BTF3 homolog 4                      |
| Q12789                |  | General transcription factor 3C polypeptide 1            |
| Q8IYS3                |  | GA binding protein transcription factor                  |
| A0A0A0MRX7            |  | Transcription factor TFIIIB component B                  |
| C9JSJ3                |  | Basic helix-loop-helix                                   |
| O00268                |  | Transcription initiation factor TFIID subunit 4          |
| Q12962                |  | Transcription initiation factor TFIID subunit 10         |
| Q7Z7C8                |  | Transcription initiation factor TFIID subunit 8          |
| E7EVE9                |  | TFIIH basal transcription factor complex                 |
| P53999                |  | Activated RNA polymerase II transcriptional co-activator |
| B4DH52                |  | Highly similar to General transcription factor II-I      |
| A0A024RDU6            |  | E74-like factor 1 (Ets domain transcription factor)      |
| Q658N3                |  | Down-regulator of transcription 1                        |
| B4DDB5                |  | Transcription initiation factor IIF $\alpha$ subunit     |
| Q9NUK2                |  | Transcription regulatory protein SNF2                    |
| Q9NQ48                |  | Leucine zipper transcription                             |
| E7EVE9                |  | TFIIH basal transcription factor complex                 |

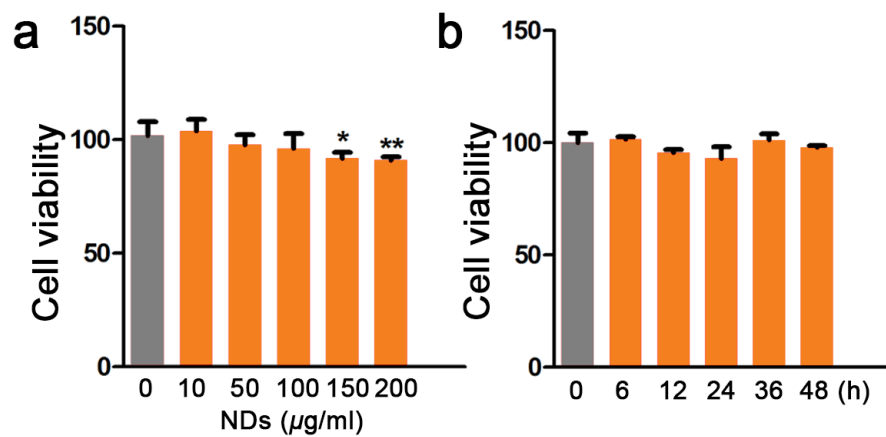

**FIG. S1** Cytotoxicity of NDs in A549 cells. (a) The cytotoxicity of NDs at different concentrations (0, 10, 50, 100, 150, 200  $\mu\text{g/mL}$ ) was measured after 24-hour incubation. (b) Cell viability was examined at indicated time points after incubation with 100  $\mu\text{g/mL}$  NDs. Data are represented as mean  $\pm$ SD (n=4). Student's *t*-test, \* $p$ <0.05, \*\* $p$ <0.01.

|       |            |            |            |            |            |            |
|-------|------------|------------|------------|------------|------------|------------|
| TβRII | MGRGLLRGLW | PLHIVLWTRI | ASTIPPHVQK | SVNNDMIVTD | NNGAVK     | FPQL       |
|       | CK         | FCDVR      | FST        | CDNQK      | SCMSN      | CSITSICEKP |
|       | QEV        | CVAVWRK    | NDENITLET  | CHDPK      | LPYHD      | FILEDAASPK |
|       | CIMKEKKKPG | ETFFMCSCSS | DECNDNIIFS | EEYNTSNPDL | LLVIFQVTGI | SLLPPLGVAI |
|       | SVIIFYCYR  | VNRQQK     | LSST       | WETGK      | TRKLM      | EFSEHCAIIL |
|       | EDDRSDISST | CANNINHNT  | LLPIELDTLV | GKGR       | FAEVYK     | AKLK       |
|       | QNTSEQ     | FETVAVK    | IFP        | YEEYASWK   | TE         | KDIFSDINLK |
|       | HENILQFLTA | EERK       | TEL        | GKQ        | YWLITAFHAK | GNLQEYLTRH |
|       | VISWEDLRKL | GSS        | LARGIAH    | LHSDHTPCGR | PKMPIVHRDL | KSSNILVK   |
|       | ND         | LTCC       | LCDFGL     | SLR        | LDPTLSV    | DDLANS     |
|       | GQVG       | TAR        | YMAPEVL    | ESR        | MNLENVE    | SFKQTDVYSM |
|       | ALVLWEMTSR | CNA        | VEVKDY     | EPPFGSKVRE | HPCVESMKDN | VLRDRGRPEI |
|       | PSFWLNHQGI | QMV        | CETL       | TEC        | WDHDPEARLT | AQCVAER    |
|       | FSE        | LEHLDR     | LSGR       | SCSEEKIPED | GSL        | NTTK       |
|       | 567        |            |            |            |            |            |
| TβRI  | MEAAVAAPRP | RLLLLVLA   | AAAAAALLPG | ATALQCFC   | HL         | CTKDNFTCVT |
|       | DGLCFVSVTE | TTDKVIHNSM | CIAEIDLIPR | DRPFVCAPSS | K          | TGSVTTTYC  |
|       | CHDPKLPYHD | FILEDAASPK | CIMKEKKKPG | ETFFMCSCSS | DECNDNIIFS |            |
|       | CNQDHCNK   | IE         | LPTTVK     | SSPG       | LGPVELAAVI | AGPVCFCV   |
|       | CIS        | LMLMVYICHN | RTVIHHRVPN | EEDPSLDRPF | ISEGTTLKDL | IYDMTTSGSG |
|       | SGLPLLQRT  | IARTIVLQES | IGKGRFGEVW | RGKWRGEEVA | VKIFSSREER | SWFREAEIYQ |
|       | TVMLRHENIL | GFIAADNKDN | GTWTQLWLVS | DYHEHGS    | SLFD       | YLNRYTVTVE |
|       | GMIKLALSTA | SGLAHLHMEI | VGTQGKPAIA | HRDLKSKNIL | VKKNGTCCIA |            |
|       | DLGLAVRHDS | ATDTIDIAPN | HRVGTKRYMA | PEVLDD     | SINM       | KHFESFKRAD |
|       | IYAMGLVFWE | IARRCSIGGI | HEDYQLPYD  | LVPSDPSVEE | MRKV       | VCEQKL     |
|       | 550        |            |            |            |            |            |
|       | RPNIPNRWQS | CEALRVMAKI | MRECWYANGA | ARLTALRIKK | TLSQLSQQEG |            |
|       |            |            |            |            |            |            |
|       |            |            |            |            |            |            |
|       |            |            |            |            |            |            |
|       |            |            |            |            |            |            |

**FIG. S2** Mass spectrometry-identified peptides from TGFβ receptors. The protein sequences of TGFβ receptors and the identified peptides (blue).



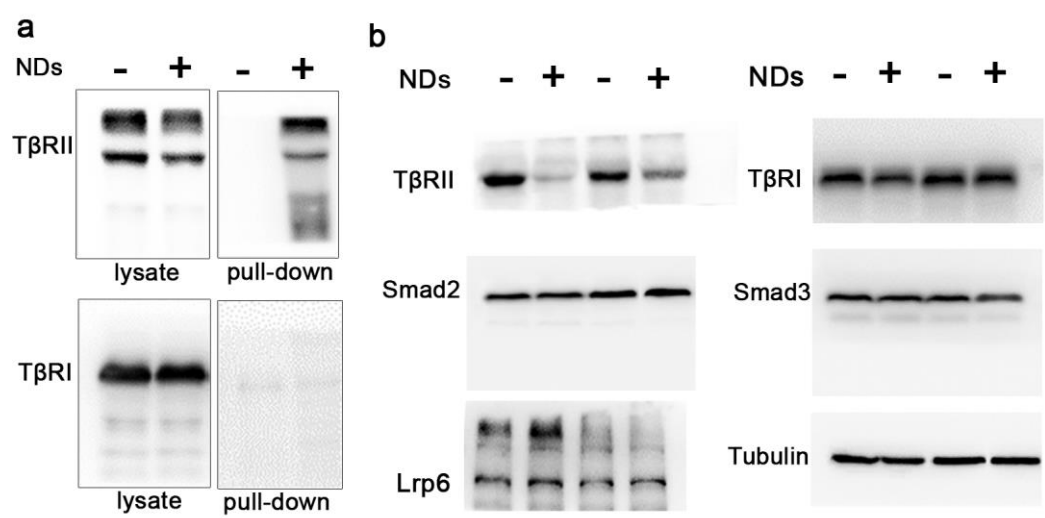

**FIG. S3** The original images of figure 2b and 2e. (a) The pull-down of TGF $\beta$  receptors by NDs from the lysate of A549 cells. (b) The effects of NDs uptake on the protein levels of indicated proteins in A549 cells.

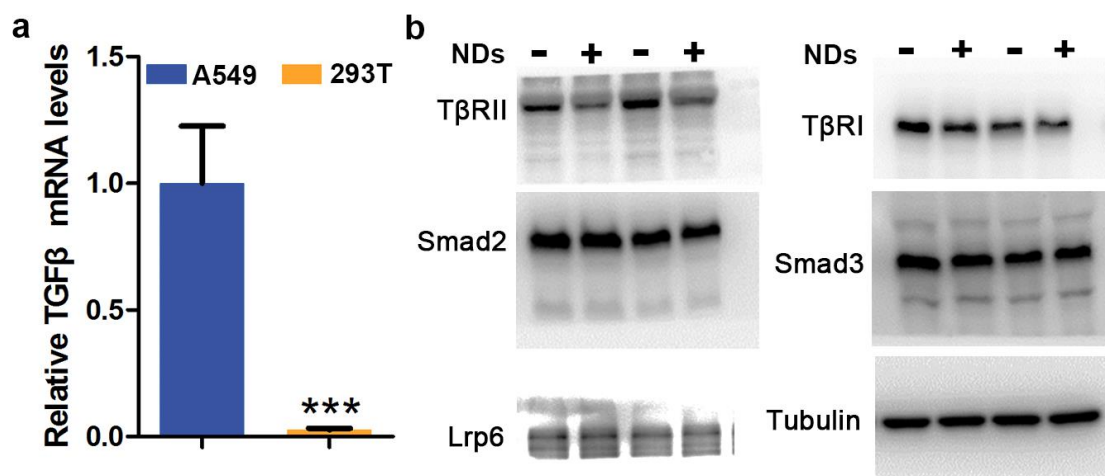

**FIG. S4** (a) The mRNA levels of TGFβ1 cytokine in A549 cells and HEK-293T cells. (b) The effects of NDs uptake on the protein levels of indicated proteins in HEK-293T cells.

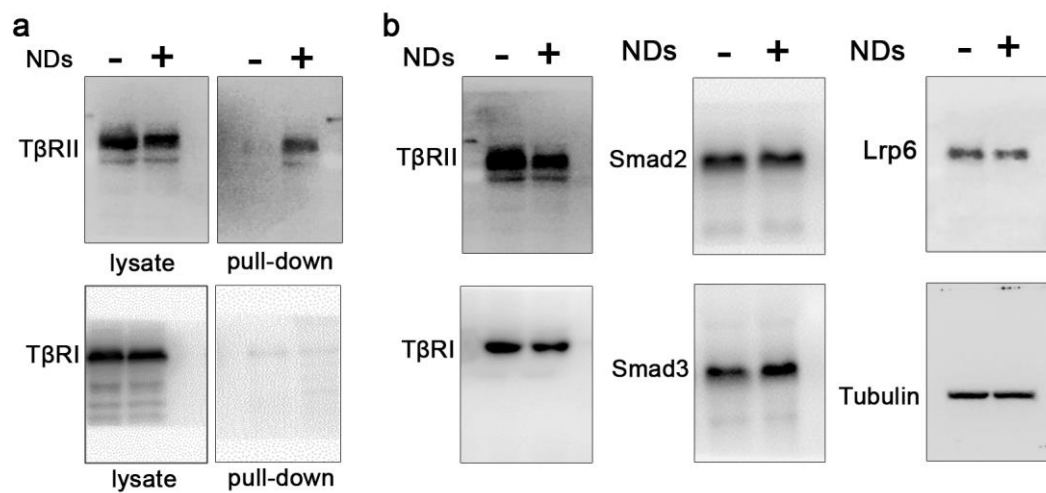

**FIG. S5** (a) The pull-down of TGFβ receptors by NDs from the lysate of A549 cells cultured in serum-free medium. (b) The effects of NDs uptake on the protein levels of indicated proteins in A549 cells cultured in serum-free medium.

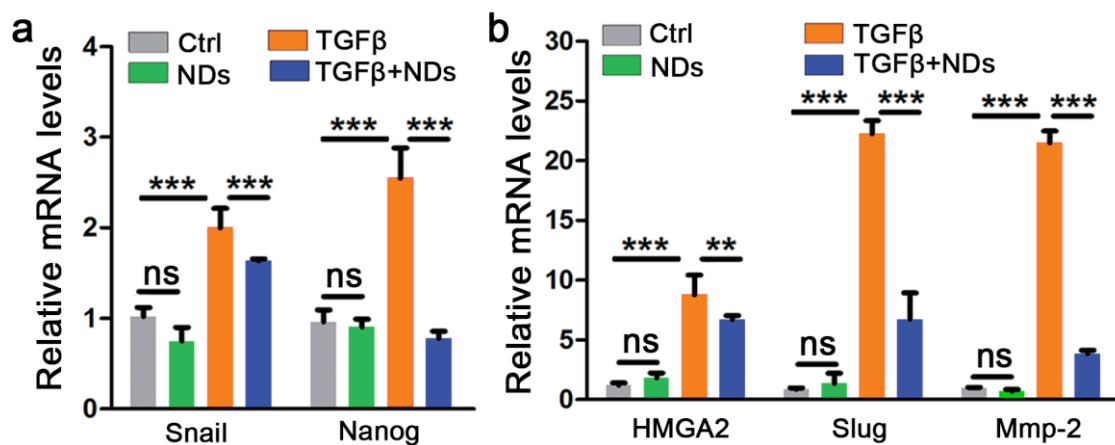

**FIG. S6** NDs attenuate the transcriptional outputs of TGFβ signaling. (a, b) The effects of NDs on the expression of endogenous TGFβ target genes in the absence or presence of TGFβ. Data are represented as mean  $\pm$ SD (n=3). Student's *t*-test, ns: not significant, \*\* $p$ <0.01, \*\*\* $p$ <0.001.

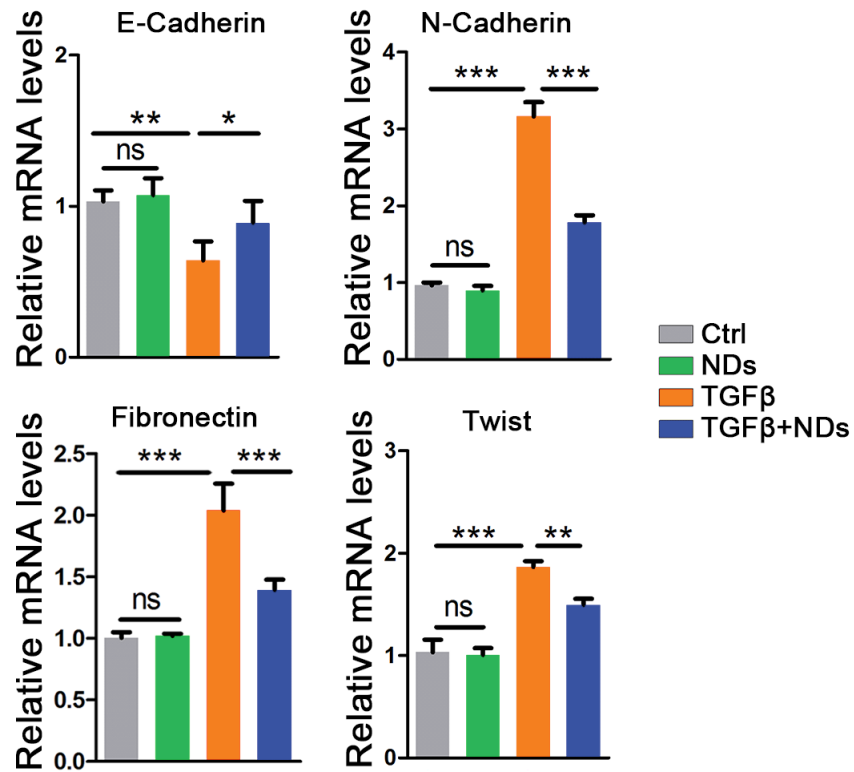

**FIG. S7** NDs block TGFβ-mediated metastasis-associated gene expression in tumor organoids. The effects of NDs on the expression of E-Cadherin, N-Cadherin, Fibronectin and Twist in the absence or presence of TGFβ. Data are represented as mean ±SD (n=3). Student's *t*-test, ns: not significant, \**p*<0.05, \*\**p*<0.01, \*\*\**p*<0.001.

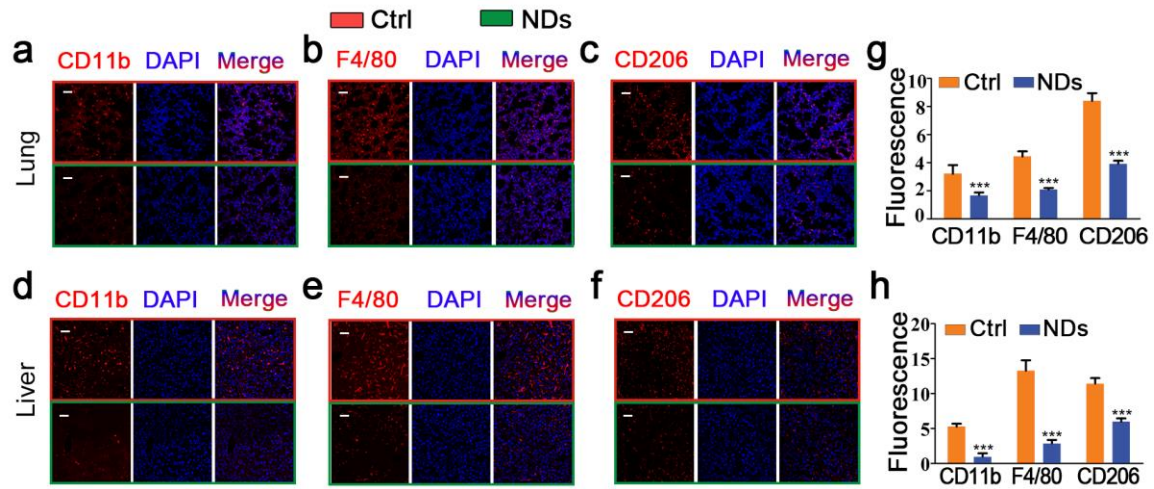

**FIG. S8** NDs reduce TAMs recruitment and M2 macrophage polarization in the lung and liver. Immunofluorescence imaging shows the expression of CD11b, F4/80 and CD206 cell surface markers in the lung (a-c) and liver (d-f) tissue sections. Scale bars, 50  $\mu$ m. (g, h) The quantification of fluorescence intensities from CD11b, F4/80 and CD206 markers in the lung (g) and liver (h) tissue sections. Data are represented as mean  $\pm$ SD (n=3), Student's *t*-test, \*\*\**p*<0.001.

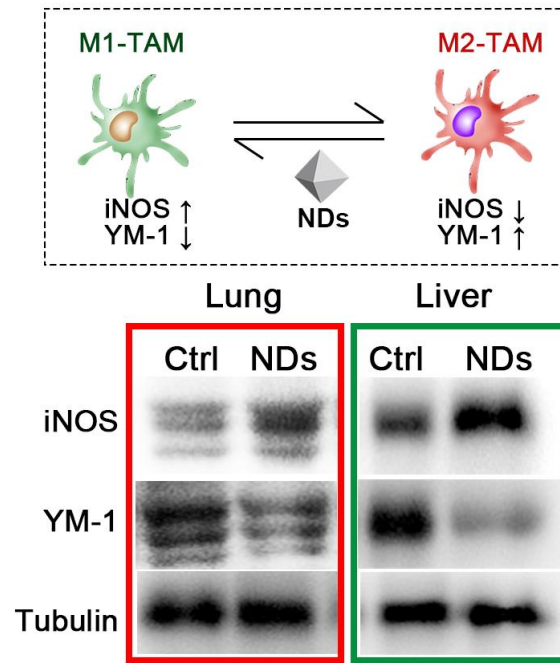

**FIG. S9** NDs affect the expression of M1-TAM and M2-TAM markers. Upper panel: a scheme for the change of marker levels during M1/M2 polarization. Lower panel: the protein levels of M1-TAM marker iNOS and M2-TAM marker YM-1 are monitored by western blotting.

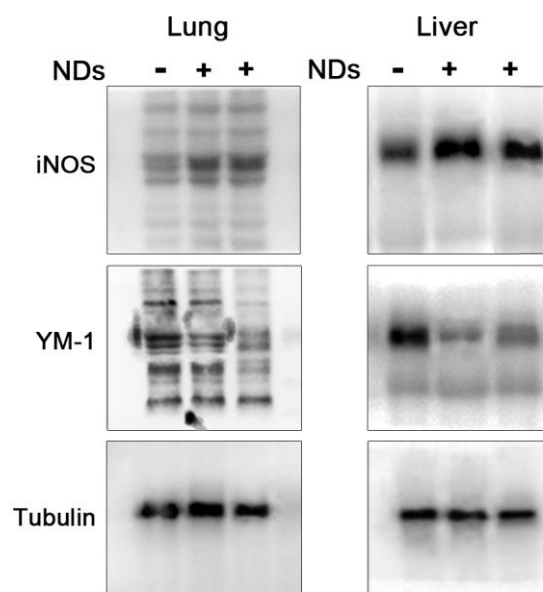

**FIG. S10** The original images of figure S9.
